# Supplementary material for: Absence of CEP78 causes photoreceptor and sperm flagella impairments in mice and a human individual
Source: eLife journal article supplement (doi:10.7554/elife.76157), 2023-02-09

Figure 1-figure supplement 1B-source data

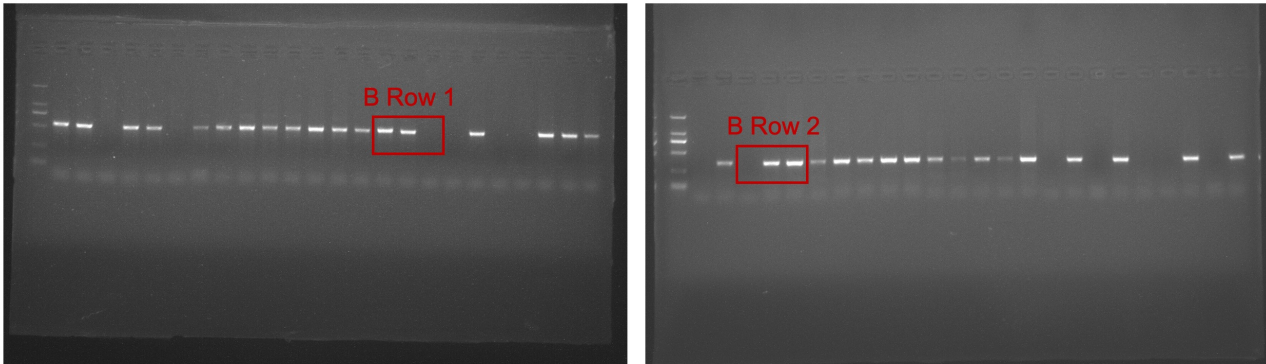

Figure 1-figure supplement 1C-source data

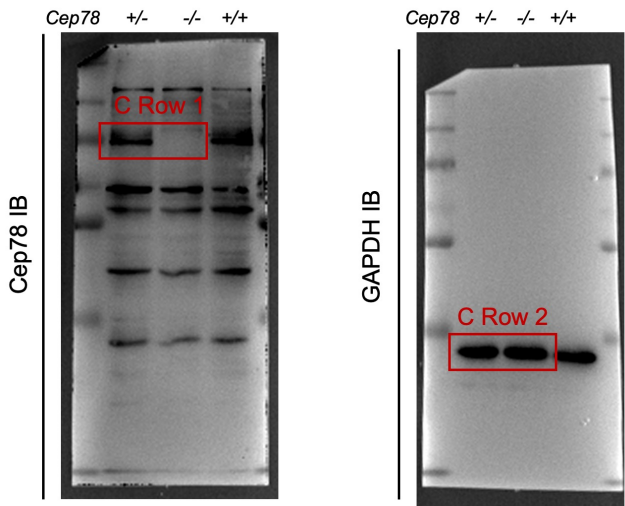

Figure 1-figure supplement 1D-source data

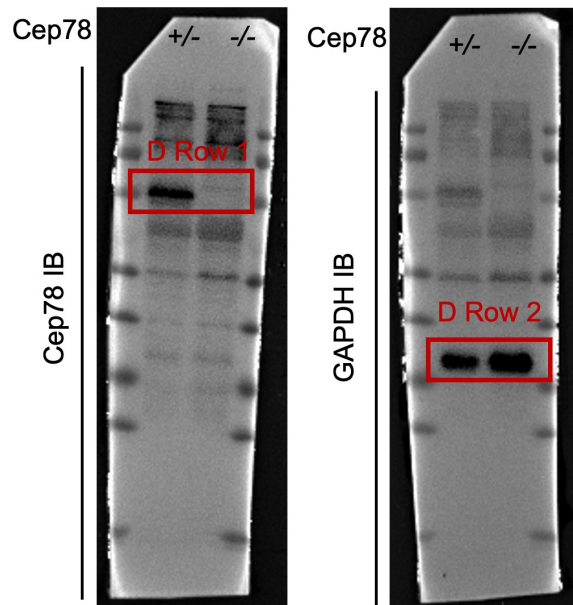

Supplement: fig1-figsupp1-data1 [file elife-76157-fig1-figsupp1-data1-v2.zip]
