# Supplementary material for: Absence of CEP78 causes photoreceptor and sperm flagella impairments in mice and a human individual
Source: eLife journal article supplement (doi:10.7554/elife.76157), 2023-02-09

Figure 7-figure supplement 2A-Source data

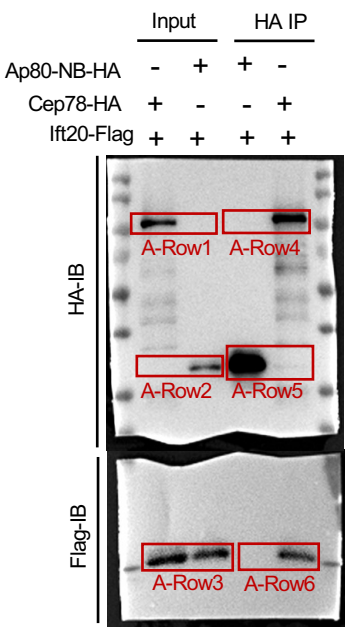

Figure 7-figure supplement 2B-Source data

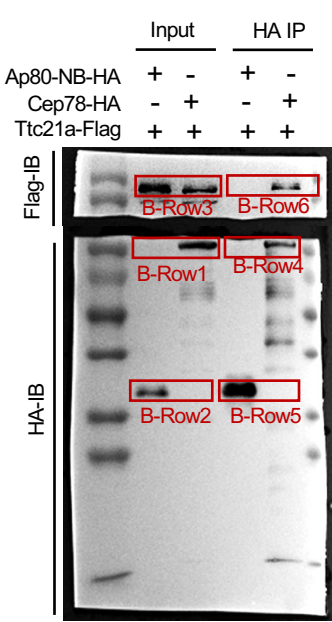

Figure 7-figure supplement 2C-Source data

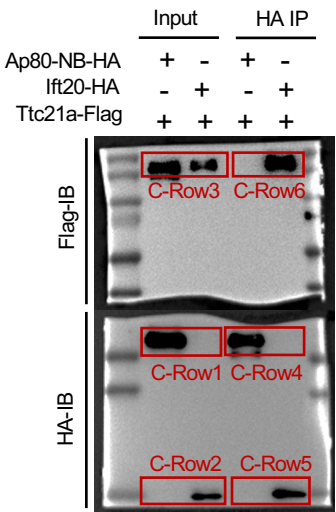

Supplement: fig7-figsupp2-data1 [file elife-76157-fig7-figsupp2-data1-v2.zip]
