# Supplementary material for: Absence of CEP78 causes photoreceptor and sperm flagella impairments in mice and a human individual
Source: eLife. 2023 Feb 9;12:e76157. doi: 10.7554/eLife.76157 (PMC9984195; doi:10.7554/eLife.76157)
Supplement: Figure 1—source data 1. [file elife-76157-fig1-data1.xlsx]

## Sheet: Figure1C source data
	Figure1C source data. Original numbers used for quantification of Scotopic a-wave amplitudes
		3M Scotopic a-wave amplitudes(μv)
	Cep78+/-	107.7	160.1	129	120	113.4
	Cep78-/-	128.8	126.7	120.8	93.4	105.5	78.02
		6M Scotopic a-wave amplitudes(μv)
	Cep78+/-	211.1	202.8	146.2	121.25	152.8	153.2
	Cep78-/-	121.6	132.4	91.91	96.97	85	73
		9M Scotopic a-wave amplitudes(μv)
	Cep78+/-	185.9	195.6	160.1	195	180.3
	Cep78-/-	102	115	104.5	78.51	118.6	133
		18M Scotopic a-wave amplitudes(μv)
	Cep78+/-	172.68	167.99	213.7	224.6	203	150
	Cep78-/-	29.4	43.55	95.94	96.17	66.99	66.36

## Sheet: Figure1D source data
	Figure1D source data. Original numbers used for quantification of Scotopic b-wave amplitudes
		3M Scotopic b-wave amplitudes(μv)
	Cep78+/-	317.9	453.1	371.1	344.4	451.9
	Cep78-/-	332.8	336.3	293.9	251.2	311.4	336.9
		6M Scotopic b-wave amplitudes(μv)
	Cep78+/-	452.9	449	447	358.2	466.6	441.4
	Cep78-/-	292.3	301.7	302.2	251.7	314.6	353.8
		9M Scotopic b-wave amplitudes(μv)
	Cep78+/-	344.4	351.9	458	429.4	487.3	475.4
	Cep78-/-	264	276	225.1	269.6	263.1	341
		18M Scotopic b-wave amplitudes(μv)
	Cep78+/-	450.6	512.4	433.4	440.6	585.8	386.6
	Cep78-/-	176.5	147.9	255.1	180.3	211	202

## Sheet: Figure 1E source data
	Figure1E source data. Original numbers used for quantification of Photopic b-wave amplitudes
		3M Photopic b-wave amplitudes(μv)
	Cep78+/-	169.8	147.8	155.1	171	160.5	173.6
	Cep78-/-	107	91.98	112.2	86.3	102.1	93.32
		6M Photopic b-wave amplitudes(μv)
	Cep78+/-	173.2	151.3	147.9	158.7	142.6	144.1
	Cep78-/-	87.22	93.92	99.34	90.98	85.98	94.88
		9M Photopic b-wave amplitudes(μv)
	Cep78+/-	130.2	157	180	159.5	173.4	162.6
	Cep78-/-	61.3	73.54	84.52	86.98	73.2	74.69
		18M Photopic b-wave amplitudes(μv)
	Cep78+/-	183.2	209.2	168.1	168.4	151.7	155
	Cep78-/-	63.89	50.78	64.35	55.45	41.5	45.18

## Sheet: Figure 1G source data
	Figure1G source data. Original numbers used for quantification of cone arrestin fluorescence intensity
		Cep78+/-	Cep78-/-
		1.07063	0.557621
		0.825279	0.483271
		0.962825	0.63197
		1.14126	0.263941

## Sheet: Figure 1I source data
	Figure1I source data. Original numbers used for quantification of 3M ONL thickness
		3M ONL thickness (μm)
Distance from ONH (μm)		Cep78+/-							Cep78-/-
	-500	39.6	39.6	39	39	40.2	37.8		35.4	39	39	39.6	39	36.6
	-400	37.8	40.2	37.2	37.8	39	37.2		34.8	36	37.8	40.2	37.8	35.4
	-300	38.4	39	38.4	33	38.4	36.6		34.2	34.2	37.2	37.8	34.8	36
	-200	35.4	35.4	34.8	31.8	34.2	31.2		31.2	30.6	34.2	32.4	34.2	34.2
	-100	29.4	27.6	29.4	24	24	19.2		20.4	16.2	28.2	25.2	25.8	26.4
	0	0	0	0	0	0	0		0	0	0	0	0	0
	100	25.2	24.6	30	29.4	26.4	21.6		17.4	21	27	30	26.4	25.2
	200	33.6	36	33.6	39	34.2	29.4		36	32.4	34.8	36	37.2	37.8
	300	38.4	39	39	39	37.8	31.8		33.6	31.8	38.4	36	37.2	36.6
	400	37.8	39.6	39	37.2	37.8	35.4		34.2	33.6	37.2	36.6	36	36
	500	37.8	41.4	42	39.6	36	34.2		36	36	37.2	35.4	36.6	36

## Sheet: Figure 1J source data
	Figure1J source data. Original numbers used for quantification of 6M ONL thickness
		6M ONL thickness (μm)
Distance from ONH (μm)		Cep78+/-							Cep78-/-
	-500	41.4	40.8	40.2	39.6	38.4	39.6		34.2	36	37.2	32.4	36.6	31.8
	-400	39.6	37.8	42	35.4	37.8	38.4		35.4	33.6	37.2	36	36	33.6
	-300	38.4	37.2	39.6	36.6	37.2	37.2		32.4	32.4	33	31.8	34.2	30.6
	-200	32.4	34.8	34.8	34.2	34.2	31.2		30.6	27.6	30.6	27	34.2	28.2
	-100	28.2	22.8	28.2	25.2	27.6	25.2		23.4	22.8	19.2	13.8	24	21.6
	0	0	0	0	0	0	0		0	0	0	0	0	0
	100	28.8	27	25.8	27	22.8	24		27	16.8	25.8	22.2	22.2	22.2
	200	36	33.6	36	34.8	32.4	31.8		31.8		34.8	30	34.2	30.6
	300	37.8	34.8	38.4	37.2	34.8	37.8		30	33.6	33	33.6	32.4	32.4
	400	36.6	38.4	40.8	37.2	37.2	36.6		34.8	33	35.4	36.6	32.4	33
	500	37.2	36	40.2	39.6	37.8	37.2		33	33	34.8	34.8	32.4	37.8

## Sheet: Figure 1K source data
	Figure1K source data. Original numbers used for quantification of 9M ONL thickness
		9M ONL thickness (μm)
Distance from ONH (μm)		Cep78+/-							Cep78-/-
	-500	40.8	40.8	42	42.6	41.4	41.4		34.8	34.8	34.8	37.2	34.2	33.6	36.6	34.8
	-400	37.8	40.2	36	42	38.4	39.6		33	33	34.8	35.4	36	33.6	36.6	33
	-300	37.2	36	35.4	42	39.6	37.2		33.6	33.6	34.2	33.6	33.6	31.8	31.8	32.4
	-200	33.6	31.8	31.2	32.4	36	33		32.4	28.8	31.2	34.2	30	28.8	29.4	30
	-100	27.6	26.4	25.2	28.2	26.4	26.4		28.2	24.6	22.8	28.8	22.2	22.2	24.6	16.8
	0	0	0	0	0	0	0		0	0	0	0	0	0	0	0
	100	27	25.8	25.8	20.4	24.6	19.2		18.6	18.6	16.8	16.8	22.8	13.2	21.6	17.4
	200	33.6	36	33	31.2	35.4	33		28.2	26.4	25.2	31.2	31.2	30.6	21	25.8
	300	37.8	39	36	37.2	37.8	37.8		33	30	31.8	31.8	31.8	30	27	30.6
	400	36.6	37.2	37.8	41.4	40.2	37.2		29.4	30.6	32.4	33	31.2	33	31.8	32.4
	500	38.4	39	39	37.8	39	37.8		30	31.8	31.2	33.6	32.4	33	30	29.4
