# Supplementary material for: Absence of CEP78 causes photoreceptor and sperm flagella impairments in mice and a human individual
Source: eLife. 2023 Feb 9;12:e76157. doi: 10.7554/eLife.76157 (PMC9984195; doi:10.7554/eLife.76157)
Supplement: Figure 2—source data 1. [file elife-76157-fig2-data1.xlsx]

## Sheet: Figure2B source data
	Figure2B source data. Original numbers used for quantification of Nphp1 signal length
		3M Nphp1 signal length(μm)
	Cep78+/-	1.72	1.09	1.93	1.37	1.36	1.28	2.2	1.65	1.71	1.4	1.31	1.3	1.55	1.21	1.94	1.34	1.57	1.45	1.49
	Cep78-/-	1.08	1.02	1	0.91	1.19	1.16	1.54	0.81	0.96	0.98	0.87	0.81	1.17	1.05	1.48	1.21	1.33	1.68
		6M Nphp1 signal length(μm)
	Cep78+/-	1.22	1.5	1.23	1.23	1.23	1.23	1.23	1.23	1.23	1.23	1.23	1.83	1.22	1.11	1.26	0.96	1.19	1.11	0.9	0.94	1.01	0.99	1
	Cep78-/-	0.65	1.87	1.07	0.97	0.94	0.88	1.07	1.37	0.74	0.71	0.82	0.79	0.65	1.06	0.98
		9M Nphp1 signal length(μm)
	Cep78+/-	0.92	0.8	1.24	1.15	0.99	0.95	1.66	1.19	1.18	0.87	1.31	1.24	0.94	1.03	0.68	1.2	0.97
	Cep78-/-	1.01	1.04	1.13	0.56	0.95	1.09	1.04	0.52	0.4	0.6	1.08	1.09	1.17	0.63	0.98	0.96	0.79

## Sheet: Figure2D source data
	Figure2D source data. Original numbers used for quantification of connecting cilium length
		3M connecting cilium length (μm)
	Cep78+/-	1.62773	1.72618	1.772	1.53932	1.66823	1.61455	1.72209	1.62068	1.93023	1.72038	1.60285	1.55138	1.92038	1.46239	1.5417	1.83886	1.74943	1.90591	1.7942	1.83466	1.45969	1.44292	1.33854	1.69928	1.18361	1.60954
	Cep78-/-	0.686591	1.3467	1.19341	1.4785	1.0642	1.00359	0.8355	0.79	1.39386	1.30273	1.21736	1.21377	1.61418	0.992045	1.11277	1.13482	1.16684	1.25077	0.729871	1.34535	1.27439	1.21852
		6M connecting cilium length (μm)
	Cep78+/-	1.60705	1.3	1.52636	1.5583	1.49418	1.60909	1.60518	1.63841	1.86205	1.77284	1.7	1.39273	1.41295	1.5342	1.21591	1.37989	1.49455	1.50432	1.64307	1.40909	1.39852	1.14419	1.29673	1.26236	1.40559	1.26736	1.10568	1.22241	1.14127	1.33721	1.30769	1.52308
	Cep78-/-	1.04602	0.730227	0.806591	0.597682	0.638269	1.06191	0.75	0.975	0.875	1.09773	1.56818	0.979659	1.18886	1.21557	1.15966	1.00368	0.901545	1.08741	1.08741
		9M connecting cilium length (μm)
	Cep78+/-	1.52875	1.54784	1.63273	1.46807	1.2425	1.52662	1.6117	1.37727	1.80477	1.46364	1.61636	1.70136	1.56636	1.29148	1.92739	1.86511	1.35569	1.59638	1.68215	1.41969	1.33892
	Cep78-/-	1.0175	0.937386	0.975341	0.892273	1.08966	1.04773	0.943091	0.781864	0.921023	0.880909	1.00318	0.986705	1.205	0.759091	1.07807	1.26693	1.19102	0.728636	0.701591	0.834364	0.915909	1.26761	1.11136	1.20486	1.22009	0.880568	1.3758	0.781279	0.724209	0.715372	0.977744	0.606651	1.01449	0.792209	0.384884	0.895721	0.626227	1.10114	1.1758	1.19807	1.09598	0.996977	0.75007	0.986023	0.889909	1.03923	1.21623
