# Supplementary material for: Absence of CEP78 causes photoreceptor and sperm flagella impairments in mice and a human individual
Source: eLife. 2023 Feb 9;12:e76157. doi: 10.7554/eLife.76157 (PMC9984195; doi:10.7554/eLife.76157)
Supplement: Figure 3—figure supplement 1—source data 1. [file elife-76157-fig3-figsupp1-data1.xlsx]

## Sheet: Figure3-figure supplement1A
	Figure3-figure supplement1A source data. Original numbers used for statistics of body weigh
	Testis weigh(mg)
	Cep78+/+	Cep78+/-	Cep78-/-
	103.41	113.27	112.64
	105.71	113.26	104.67
	103.5	101.2	91.65
	87	98.86	85.97
	99.62	105.1	103.2
	100.34	86	88

## Sheet: Figure3-figure supplement1B
	Figure3-figure supplement1B source data. Original numbers used for statistics of body weigh
	Body weigh(g)
	Cep78+/+	Cep78+/-	Cep78-/-
	30.25	35.15	22.45
	26.54	27.59	28.72
	29.5	30.2	29.3

## Sheet: Figure3-figure supplement1C
	Figure3-figure supplement1C source data. Original numbers used for statistics of testis/body weigt ratio
	Testis/body weigt ratio (%)
	Cep78+/+	Cep78+/-	Cep78-/-
	0.389638	0.3668	0.408241
	0.395629	0.3583	0.38294
	0.294915	0.322248	0.36445
	0.3508	0.322219	0.392201
	0.329322	0.2847	0.3003
	0.331792	0.348	0.3522
