# Supplementary material for: Absence of CEP78 causes photoreceptor and sperm flagella impairments in mice and a human individual
Source: eLife. 2023 Feb 9;12:e76157. doi: 10.7554/eLife.76157 (PMC9984195; doi:10.7554/eLife.76157)
Supplement: Figure 3—source data 1. [file elife-76157-fig3-data1.xlsx]

## Sheet: Figure3A Left source data
	Figure3A Left source data. Original numbers used for statistics of fertility rate
	Cep78+/-	Cep78-/-
	1	0

## Sheet: Figure3A Right source data
	Figure3A right source data. Original numbers used for statistics of litter size
	Cep78+/-	Cep78-/-
	5	0
	6	0
	7	0
	7	0
	8
