# Supplementary material for: Absence of CEP78 causes photoreceptor and sperm flagella impairments in mice and a human individual
Source: eLife. 2023 Feb 9;12:e76157. doi: 10.7554/eLife.76157 (PMC9984195; doi:10.7554/eLife.76157)
Supplement: Figure 4—source data 1. [file elife-76157-fig4-data1.xlsx]

## Sheet: Figure4L source data
	Figure4L source data. Original numbers used for quantification of centriole length
	Centriole length(nm)
	Cep78+/-	Cep78-/-
	386.389	449.153
	314.575	500.078
	317.646	455.592
	340.669	478.42
	428.276	471.981
	449.153	456.762
	384.375	508.858
	472.372	463.786
	444.86	469.835
	436.275	479.981
	395.106	559.002
	418.91	605.83
	402.911	586.904
	378.912	482.517
	402.326	471.591
	431.007	438.422
	417.544	479.981
	469.835	506.516
	413.447	722.898
	358.62	487.786
	359.791	437.056
	410.13	568.173
	421.252	606.025
	312.768	582.026
	358.099	620.073
	333.325	440.373
	319.211	476.274
	340.382	593.342
	342.784	526.808
	376.567	1061.03
	404.344	525.443
	370.862	607.586
	392.933	692.851
	452.091	525.443
	438.878	489.346
	495.483	1053.81
	413.053	387.302
	469.058	870.209
	484.222	455.592
	382.874	487.786
	479.718	709.24
	408.398	472.372
	335.728	951.182
	497.285	741.629
	361.553	577.733
	351.793	580.075
	499.087	463.786
	389.48	702.606
	499.988	593.342
	329.271	478.42
	468.457	567.197
	345.637	472.372
	367.408	433.154
	489.027	538.32
	522.96	612.659
	350.142	667.486
	477.916	605.83
	488.427	444.86
	371.763	462.421
	471.46	566.807
	478.817	530.711
	358.099	520.565
	370.862	953.38
	404.344	460.729
	415.906	513.369
	452.692	1037.03
	361.553	497.863
	376.267	816.497
	335.728	378.97
	482.571	649.834
		499.988
		1055.98
		875.504
		510.798
		510.348
		380.171
		495.183
		666.951
		499.087
		557.344
		427.317
		493.832
		832.863
		934.362
		586.322
		503.591
		673.857
		623.408
		501.79
		725.658
		745.477
		378.97
		503.441
		717.7
		509.897
		520.708
		491.88
		525.663
		466.355
		451.34
		481.37
		436.476
		652.086
		563.65
		526.414
		732.715
		1157.63
