# Supplementary material for: Absence of CEP78 causes photoreceptor and sperm flagella impairments in mice and a human individual
Source: eLife. 2023 Feb 9;12:e76157. doi: 10.7554/eLife.76157 (PMC9984195; doi:10.7554/eLife.76157)
Supplement: Figure 5—source data 1. [file elife-76157-fig5-data1.xlsx]

## Sheet: Figure5P source data
	Figure5P source data. Original numbers used for quantification of proportion of spermatocyte types
		Leptotene			Zygotene			Pachytene			Diplotene
	Cep78+/-	15.51% (9/58)	18.75% (12/64)	16.39% (10/61)	12.06% (7/58)	10.93% (7/64)	13.11% (8/61)	51.72% (30/58)	50.00% (32/64)	47.54% (29/61)	20.68% (12/58)	20.31% (13/64)	22.95% (14/61)
	Cep78-/-	14.03% (8/57)	20.00% (13/65)	15.09% (8/53)	12.28% (7/57)	12.30% (8/65)	11.32% (6/53)	54.38% (31/57)	49.23% (32/65)	54.71% (29/53)	19.29% (11/57)	18.46% (12/65)	18.86% (10/53)
