# Supplementary material for: Absence of CEP78 causes photoreceptor and sperm flagella impairments in mice and a human individual
Source: eLife. 2023 Feb 9;12:e76157. doi: 10.7554/eLife.76157 (PMC9984195; doi:10.7554/eLife.76157)
Supplement: Figure 7—figure supplement 3—source data 2. [file elife-76157-fig7-figsupp3-data2.xlsx]

## Sheet: Figure7-figure supplement 3A
	Figure7-figure supplement 3A source data. Original numbers used for quantification of Cep78 mRNA relative expression level
	Cep78 relative mRNA expression level
	Scramble-siRNA	Cep78-siRNA	Cep78-siRNA+Cep78syn-HA
	0.88595	0.105429	0.644498
	1.39173	0.305152	1.85913
	0.811027	0.253623	0.663247

## Sheet: Figure7-figure supplement 3B
	Figure7-figure supplement 3B source data. Original numbers used for quantification of Ift20 mRNA relative expression level
	Ift20 relative mRNA expression level
	Scramble-siRNA	Ift20-siRNA	Ift20-siRNA+Ift20syn-Flag
	0.911929	0.331665	1.15831
	1.0918	0.293834	1.08118
	0.996267	0.304277	1.01064

## Sheet: Figure7-figure supplement 3C
	Figure7-figure supplement 3C source data. Original numbers used for quantification of Ttc21a mRNA relative expression level
	Ttc21a relative mRNA expression level
	Scramble-siRNA	Ttc21a-siRNA	Ttc21a-siRNA+Ttc21asyn-Flag
	1.09314	0.320411	0.909275
	1.07146	0.208166	1.66496
	0.835399	0.227402	1.46717

## Sheet: Figure7-figure supplement 3E
	Figure7-figure supplement 3E source data. Original numbers used for quantification of Ift20 relative expression level
	Ift20 relative expression level
	Scramble-siRNA	Ift20-siRNA	Ift20-siRNA+Ift20syn-Flag
	1.05358	0.335197	1.03675
	0.951719	0.354943	0.940023
	0.994701	0.292021	0.799956

## Sheet: Figure7-figure supplement 3F
	Figure7-figure supplement 3F source data. Original numbers used for quantification of Cep78 relative expression level
	Cep78 relative expression level
	Scramble-siRNA	Ift20-siRNA	Ift20-siRNA+Ift20syn-Flag
	1.04476	1.11516	0.982217
	0.877231	0.833315	0.662563
	1.07801	0.9244	0.96399

## Sheet: Figure7-figure supplement 3G
	Figure7-figure supplement 3F source data. Original numbers used for quantification of Ttc21a relative expression level
	Ttc21a relative expression level
	Scramble-siRNA	Ttc21a-siRNA	Ttc21a-siRNA+Ttc21asyn-Flag
	1.08787	0.993245	0.72506
	0.81591	0.832893	0.950078
	1.09622	1.30086	1.16443

## Sheet: Figure7-figure supplement 3I
	Figure7-figure supplement 3I source data. Original numbers used for quantification of Ttc21a relative expression level
	Relative Ttc21a expression
	Scramble-siRNA	Ttc21a-siRNA	Ttc21a-siRNA+Ttc21asyn-Flag
	0.861625	0.0853737	0.925662
	1.22925	0.249643	1.06299
	0.909124	0.304626	1.30542

## Sheet: Figure7-figure supplement 3J
	Figure7-figure supplement 3J source data. Original numbers used for quantification of Cep78 relative expression level
	Relative Cep78 expression
	Scramble-siRNA	Ttc21a-siRNA	Ttc21a-siRNA+Ttc21asyn-Flag
	1.06964	1.03957	1.05151
	1.01733	1.01733	0.842826
	0.913028	1.29051	1.23464

## Sheet: Figure7-figure supplement 3K
	Figure7-figure supplement 3K source data. Original numbers used for quantification of Ift20 relative expression level
	Relative Ift20 expression
	Scramble-siRNA	Ttc21a-siRNA	Ttc21a-siRNA+Ttc21asyn-Flag
	0.97433	0.987504	1.14996
	1.0254	0.938608	1.007
	1.00027	0.854702	1.13481
