# Supplementary material for: Absence of CEP78 causes photoreceptor and sperm flagella impairments in mice and a human individual
Source: eLife. 2023 Feb 9;12:e76157. doi: 10.7554/eLife.76157 (PMC9984195; doi:10.7554/eLife.76157)
Supplement: Figure 7—figure supplement 5—source data 2. [file elife-76157-fig7-figsupp5-data2.xlsx]

## Sheet: Figure 7-figure supplement 5
	Figure 7-figure supplement 5 source data. Original numbers used for quantification of Cp110 relative expression level
	Cp110 relative expression
	Cep78+/-	Cep78-/-
	0.690018	0.142101
	0.907398	0.259622
	1.40258	0.237639
