# Supplementary material for: Absence of CEP78 causes photoreceptor and sperm flagella impairments in mice and a human individual
Source: eLife. 2023 Feb 9;12:e76157. doi: 10.7554/eLife.76157 (PMC9984195; doi:10.7554/eLife.76157)
Supplement: Figure 7—source data 2. [file elife-76157-fig7-data2.xlsx]

## Sheet: Figure7H source data
	Figure7H source data. Original numbers used for quantification of Ift20 relative expression level
	Ift20 relative expression level
	Cep78+/-	Cep78-/-
	1.04375	0.289175
	1.10458	0.393218
	0.851673	0.320563

## Sheet: Figure7I source data
	Figure7I source data. Original numbers used for quantification of Ttc21a relative expression level
	Ttc21a relative expression level
	Cep78+/-	Cep78-/-
	1.32371	0.561642
	0.938937	0.46122
	0.737355	0.485839

## Sheet: Figure7K source data
	Figure 7K source data. Original numbers used for quantification of Cep78 relative expression level
	Cep78 relative expression level
	Scramble-siRNA	Cep78-siRNA	Cep78-siRNA+Cep78syn-HA
	0.835547	0.219901	1.27926
	1.32617	0.391348	1.02599
	0.838285	0.190731	0.952876

## Sheet: Figure7L source data
	Figure7L source data. Original numbers used for quantification Ift20 of relative expression level
	Ift20 relative expression level
	Scramble-siRNA	Cep78-siRNA	Cep78-siRNA+Cep78syn-HA
	0.99837	0.437494	1.18984
	1.10459	0.636215	1.32234
	0.897036	0.306144	1.01013

## Sheet: Figure 7M source data
	Figure7M source data. Original numbers used for quantification of Ttc21a relative expression level
	Ttc21a relative expression level
	Scramble-siRNA	Cep78-siRNA	Cep78-siRNA+Cep78syn-HA
	1.17983	0.744775	1.54657
	0.847615	0.687193	0.931663
	0.972556	0.56527	1.17678

## Sheet: Figure 7O source data
	Figure7O source data. Original numbers used for quantification of cilia length
	cilia length (μm)
	Scramble-siRNA	Cep78-siRNA	Cep78-siRNA+Cep78syn-HA	Ift20-siRNA	Ift20-siRNA+Ift20syn-Flag	Ttc21a-siRNA	Ttc21a-siRNA+Ttc21asyn-Flag
	2.74993	0.497135	4.29674	1.98614	2.6166	0.674758	2.81975
	3.26494	2.28403	2.6178	1.35958	3.32544	2.07022	3.14182
	2.74363	1.14682	3.18235	1.70326	2.6187	2.06151	3.73099
	3.34256	1.22099	3.03371	0.592628	5.11444	0.887065	2.79948
	2.80939	0.744426	4.11882	1.94845	2.95578	1.91151	2.64333
	3.99465	0.672356	2.1534	0.546533	2.84032	1.74095	2.90488
	2.47486	1.57293	2.5645	0.539777	2.53012	1.61963	3.15608
	3.33761	0.638723	2.24019	1.54245	2.35144	1.04562	3.27049
	3.01809	0.889167	2.13824	0.770402	1.81227	1.16349	2.67306
	3.40277	2.02788	2.36766	2.17712	3.76252	0.863192	2.93687
	2.14559	1.40297	3.13386	2.26481	3.60502	1.30988	2.83401
	3.39766	2.6154	3.53625	1.9516	4.63697	2.763	2.59828
	2.73627	0.893071	2.95638	1.52294	5.01009	1.5342	2.54724
	2.65429	2.00821	2.772	0.668903	3.17034	1.60432	3.57063
	3.25743	1.67263	2.26151	1.62248	2.97816	1.32955	2.64603
	3.22304	1.12445	2.76465	1.45897	3.5391	1.26123	2.99302
	1.91151	1.0764	2.95053	0.936013	1.40927	1.56167	3.19842
	2.74318	0.866345	3.16854	1.61843	3.21058	3.18716	2.79513
	2.63102	1.80942	2.9735	0.866345	2.83792	0.964841	2.03494
	3.48445	0.91214	4.05005	0.854634	2.3049	0.680314	2.69798
	3.40487	1.28285	2.71915	1.73314	2.52606	2.46541	2.28103
	2.77531		3.25082	0.866345	2.45279	2.29424	3.45652
	2.92605		3.49631	1.3315	3.0214	1.67128	2.69228
	3.58655		3.48445	1.52429	3.79961	1.71002	3.09016
	4.23413		4.75289	1.02985		1.16544	2.67411
	3.96567		3.42349	1.27625		2.19139	2.92605
	3.97107		3.59766	0.839319		0.688872	2.38433
	2.83867			1.63585			2.94452
	1.87413			0.901179			2.09995
	2.39724			1.05118
	4.40245
	3.40412
	5.07855
	5.36068

## Sheet: Figure 7Q source data
	Figure7Q source data. Original numbers used for quantification of centriole length
	Centriole length (nm)
	Scramble-siRNA	Cep78-siRNA	Cep78-siRNA+Cep78syn-HA	Ift20-siRNA	Ift20-siRNA+Ift20syn-Flag	Ttc21a-siRNA	Ttc21a-siRNA+Ttc21asyn-Flag
	0.445635	0.446385	0.451641	0.644279	0.509747	0.400891	0.469959
	0.403444	0.550287	0.488577	0.792323	0.508096	0.387078	0.415906
	0.329271	0.7171	0.368459	0.816947	0.528065	0.443232	0.435725
	0.424614	0.530918	0.404945	0.584821	0.477916	0.43092	0.458397
	0.380171	0.436776	0.415906	0.45149	0.396837	0.478817	0.523861
	0.303446	0.577764	0.446235	0.78902	0.424915	0.392933	0.537224
	0.436476	0.423113	0.405696	0.62506	0.404044	0.467556	0.505243
	0.309152	0.743525	0.390831	0.708241	0.435425	0.355997	0.424614
	0.426866	0.504492	0.45074	0.732415	0.538275	0.390681	0.404344
	0.470259	0.567554	0.40975	0.828058	0.636321	0.465754	0.392933
	0.288431	0.450439	0.43002	0.800431	0.528966	0.437677	0.488877
	0.437677	0.489027	0.405696	0.484222	0.446385	0.437677	0.441581
	0.446385	0.503441	0.417407	0.751934	0.474763	0.480769	0.456595
	0.390681	0.7177	0.424764	0.626561	0.390681	0.493832	0.436476
	0.465754	0.798029	0.466205	0.615751	0.518456	0.445935	0.394135
	0.31816	0.499087	0.493531	0.418759	0.480769	0.424915	0.43002
	0.404344	0.488427	0.479117	0.884213	0.449989	0.43002	0.363204
	0.376567	0.555542	0.387828	0.615751	0.490228	0.402843	0.477166
	0.45074	0.628813	0.467556	0.375366	0.445635	0.443383	0.407948
	0.382874	0.487976	0.405696	0.534672	0.504492	0.365306	0.385426
	0.407948	0.349541	0.406447	0.499087	0.516654	0.474163	0.462601
	0.376267	0.424614	0.427617	0.390381	0.476865	0.439178	0.454493
	0.49248	0.439929	0.504792	0.552089	0.464854	0.459598	0.386027
	0.466355	0.60434	0.385426	0.835865	0.370712	0.427617	0.45074
	0.324166	0.895474	0.459298	0.736018	0.393984	0.432272	0.456595
	0.436176	0.795776	0.414254	0.393984	0.520408	0.518606	0.391582
	0.356898	0.558545	0.437677	0.473562	0.50209	0.463802	0.380171
	0.48152	0.524462	0.459598	0.669503	0.465454	0.510048	0.483472
	0.466956	0.584821	0.403143	0.828058	0.404344	0.387528	0.477166
	0.42071	0.577614	0.441581	0.872952	0.360652	0.413503	0.451641
	0.542329	0.525363	0.436476	1.11604	0.562749	0.457646	0.456595
	0.436476	0.49188	0.456595	0.812743	0.42041	0.383624	0.504492
	0.423113	0.750732	0.367408	0.77881	0.48137	0.446385	0.449989
	0.459598	0.746678	0.427317	0.965892	0.356898		0.390681
		0.612598	0.437227	0.762744	0.45074		0.453893
		0.607493	0.437227		0.383474		0.446385
		0.56425	0.391582				0.404044
		0.463502	0.432572				0.435425
		0.607493	0.415305				0.487676
		0.466355					0.405696
		0.433323					0.443383
		0.469058					0.40975
		0.404344
		0.438578
		0.476865
		1.08946
		1.03301
		0.708241
		0.706739
		0.458397
		0.395936
		0.60524
		0.597733
		0.447887
		0.548035
		0.539026
		0.558545
		0.484673
		0.382874
		0.490529
		0.556443
		0.43002
		0.466055
		0.488877
		0.397588
		0.437677
		0.441581

## Sheet: Figure 7S source data
	Figure7S source data. Original numbers used to plot fluorescence intensity traces
			Fluorescence Intensity
			Scramble-siRNA		Cep78-siRNA		Cep78-siRNA+Cep78syn-HA
	Distance (μm)	Distance (pixels)	γ-tubulin	Ift20	γ-tubulin	Ift20	γ-tubulin	Ift20
	0	0	2	5	15	18	0	17
	0.0134228	1	1	6	15	18	0	19
	0.0268456	2	2	5	17	18	0	17
	0.0402685	3	3	8	18	18	0	19
	0.0536913	4	2	8	17	19	0	19
	0.0671141	5	1	3	17	19	0	23
	0.0805369	6	1	5	17	20	0	17
	0.0939597	7	2	5	19	20	0	22
	0.107383	8	1	4	16	21	0	12
	0.120805	9	2	3	20	21	1	18
	0.134228	10	1	3	19	22	1	19
	0.147651	11	1	1	20	22	1	21
	0.161074	12	1	1	20	22	2	19
	0.174497	13	1	3	21	24	3	24
	0.187919	14	1	1	21	22	3	22
	0.201342	15	0	3	23	22	3	24
	0.214765	16	0	4	23	21	3	17
	0.228188	17	1	6	24	21	6	23
	0.241611	18	1	5	27	21	7	23
	0.255034	19	1	10	26	19	7	27
	0.268456	20	1	7	28	20	11	22
	0.281879	21	1	16	31	20	14	26
	0.295302	22	2	18	33	20	16	22
	0.308725	23	2	26	39	20	17	27
	0.322148	24	3	25	34	19	23	30
	0.33557	25	4	28	36	20	29	34
	0.348993	26	5	31	41	21	32	29
	0.362416	27	6	36	45	21	32	38
	0.375839	28	9	37	51	22	39	40
	0.389262	29	10	40	50	22	48	35
	0.402685	30	13	47	52	23	49	47
	0.416107	31	13	47	52	22	60	52
	0.42953	32	18	51	56	23	63	42
	0.442953	33	20	53	58	23	68	53
	0.456376	34	22	58	56	24	79	60
	0.469799	35	27	61	57	24	80	58
	0.483221	36	31	58	62	25	85	55
	0.496644	37	33	64	60	26	91	64
	0.510067	38	40	57	56	26	92	61
	0.52349	39	41	56	56	27	95	69
	0.536913	40	44	68	59	27	96	66
	0.550336	41	52	63	58	27	100	67
	0.563758	42	55	74	61	27	106	67
	0.577181	43	59	71	63	29	101	74
	0.590604	44	68	89	58	29	106	69
	0.604027	45	67	73	56	27	104	70
	0.61745	46	81	85	56	28	105	71
	0.630872	47	84	81	61	28	100	65
	0.644295	48	76	76	58	26	94	66
	0.657718	49	81	84	62	26	93	71
	0.671141	50	88	84	63	25	91	57
	0.684564	51	85	87	60	24	90	65
	0.697987	52	91	95	65	25	86	69
	0.711409	53	91	80	69	24	71	62
	0.724832	54	87	99	69	24	69	55
	0.738255	55	79	83	69	23	71	58
	0.751678	56	85	85	73	23	63	58
	0.765101	57	87	79	72	22	58	57
	0.778523	58	81	90	73	23	51	48
	0.791946	59	82	77	70	23	44	56
	0.805369	60	74	81	70	23	34	47
	0.818792	61	79	84	71	23	33	45
	0.832215	62	69	66	75	24	31	54
	0.845638	63	68	76	71	24	23	40
	0.85906	64	61	71	73	24	24	40
	0.872483	65	59	75	73	24	18	40
	0.885906	66	54	66	70	25	17	39
	0.899329	67	47	65	68	26	15	33
	0.912752	68	55	62	69	27	11	40
	0.926174	69	48	57	71	28	10	34
	0.939597	70	42	67	70	30	8	30
	0.95302	71	45	56	67	29	9	29
	0.966443	72	40	61	66	30	7	34
	0.979866	73	38	51	60	31	5	32
	0.993289	74	39	65	59	31	4	26
	1.00671	75	44	58	53	32	5	32
	1.02013	76	44	68	51	32	4	26
	1.03356	77	51	68	44	32	3	24
	1.04698	78	53	65	44	32	3	27
	1.0604	79	60	73	41	31	4	24
	1.07383	80	66	73	36	29	3	17
	1.08725	81	62	79	37	30	3	17
	1.10067	82	71	78	33	29	2	18
	1.11409	83	79	76	35	28	2	18
	1.12752	84	85	83	30	28	3	25
	1.14094	85	87	88	28	27	3	20
	1.15436	86	90	100	27	25	4	19
	1.16779	87	95	98	27	26	4	20
	1.18121	88	107	105	27	24	7	27
	1.19463	89	108	101	30	24	6	23
	1.20805	90	104	115	29	23	7	28
	1.22148	91	105	111	28	24	8	29
	1.2349	92	114	116	29	23	13	37
	1.24832	93	109	114	27	25	17	47
	1.26174	94	111	116	32	25	20	48
	1.27517	95	109	126	31	24	26	56
	1.28859	96	108	101	35	24	25	71
	1.30201	97	107	107	35	24	34	73
	1.31544	98	99	102	41	25	39	67
	1.32886	99	96	102	43	24	45	84
	1.34228	100	93	105	50	24	53	88
	1.3557	101	87	96	54	24	58	97
	1.36913	102	79	92	58	23	68	110
	1.38255	103	77	89	64	24	79	98
	1.39597	104	69	90	64	24	80	122
	1.4094	105	57	74	70	23	89	124
	1.42282	106	58	69	71	23	96	116
	1.43624	107	45	77	73	25	100	132
	1.44966	108	43	62	76	24	102	129
	1.46309	109	35	61	82	23	106	124
	1.47651	110	29	55	84	25	109	131
	1.48993	111	25	50	83	23	116	128
	1.50336	112	24	44	90	23	120	140
	1.51678	113	18	31	92	22	121	146
	1.5302	114	15	30	90	24	113	142
	1.54362	115	12	41	96	23	115	135
	1.55705	116	11	22	95	22	114	141
	1.57047	117	10	26	97	23	119	147
	1.58389	118	7	24	94	23	110	137
	1.59732	119	8	24	93	22	109	144
	1.61074	120	7	21	95	23	110	140
	1.62416	121	6	17	90	23	99	151
	1.63758	122	6	15	94	22	95	135
	1.65101	123	5	10	87	21	85	131
	1.66443	124	3	6	88	21	83	129
	1.67785	125	4	5	85	22	78	122
	1.69128	126	4	9	83	21	66	115
	1.7047	127	3	5	82	22	56	114
	1.71812	128	2	5	77	22	56	94
	1.73154	129	2	4	78	22	43	83
	1.74497	130	2	1	71	22	36	94
	1.75839	131	1	1	70	22	27	76
	1.77181	132	1	2	63	22	20	55
	1.78523	133	2	1	59	21	16	50
	1.79866	134	1	1	57	22	12	48
	1.81208	135	2	1	51	21	7	43
	1.8255	136	2	2	47	22	5	35
	1.83893	137	2	1	39	22	4	28
	1.85235	138	3	1	38	22	2	27
	1.86577	139	2	2	33	21	2	24
	1.87919	140	1	1	30	22	2	17
	1.89262	141	2	1	27	22	1	15
	1.90604	142	2	1	28	21	1	17
	1.91946	143	1	4	27	22	0	16
	1.93289	144	5	3	24	22	0	11
	1.94631	145	3	2	23	23	1	14
	1.95973	146	4	7	21	23	0	8
	1.97315	147	3	3	20	22	0	17
	1.98658	148	2	6	20	22	0	14
	2	149	3	4	19	24	0	14
