# Supplementary material for: Absence of CEP78 causes photoreceptor and sperm flagella impairments in mice and a human individual
Source: eLife. 2023 Feb 9;12:e76157. doi: 10.7554/eLife.76157 (PMC9984195; doi:10.7554/eLife.76157)
Supplement: Supplementary file 1. — (A) Different expression proteins between Cep78+/− and Cep78−/− male mice elongating spermatids. (B) The enriched cellular components of different expression proteins between Cep78+/− and Cep78−/− male mice elongating spermatids. [file elife-76157-supp1.xlsx]

## Sheet: Supplementary file 1A
Supplementary file 1A. Different expression proteins between Cep78+/- and Cep78-/- male mice elongating spermatids.
Protein accessions	Protein Names	Protein descriptions	Gene name	No of proteins	Peptides	Unique peptides	MW (kDa)	Cep78+/- average	Cep78-/- average	p value (Cep78+/-/Cep78-/-)	Fold change (Cep78+/-/Cep78-/-)	Cep78+/-1	Cep78+/-2	Cep78+/-3	Cep78-/-1	Cep78-/-2	Cep78-/-3
S4R1S6;S4R2U9;Q3UPH7-3;Q3UPH7-6;Q3UPH7-2;Q3UPH7;S4R189	Rho guanine nucleotide exchange factor (GEF) 40	\\tr|S4R1S6|S4R1S6_MOUSE Isoform of Q3UPH7, Rho guanine nucleotide exchange factor 40 OS=Mus musculus OX=10090 GN=Arhgef40 PE=1 SV=1;tr|S4R2U9|S4R2U9_MOUSE Isoform of Q3UPH7, Rho guanine nucleotide exchange factor 40 OS=Mus musculus OX=10090 GN=Arhgef40 PE=1\\"\"\"\"\""	Arhgef40	7	1	1	53.22	3.76197e+06	199897	5.53e-05	18.8195	3688700	3511000	4086200	0	308820	290870
Q91VB8;P01942	hemoglobin alpha, adult chain 2;hemoglobin alpha, adult chain 1	\\tr|Q91VB8|Q91VB8_MOUSE Isoform of P01942, Alpha globin 1 OS=Mus musculus OX=10090 GN=Hba-a1 PE=1 SV=1;sp|P01942|HBA_MOUSE Hemoglobin subunit alpha OS=Mus musculus OX=10090 GN=Hba PE=1 SV=2\\"\"\"\"\""	Hba-a2;Hba-a1	4	8	6	15.112	3.87967e+07	4.62277e+06	0.00159897	8.39252	40144000	30494000	45752000	3530800	5287000	5050500
A0A0A6YW87;Q9CX13	Protein cornichon homolog 4	\\tr|A0A0A6YW87|A0A0A6YW87_MOUSE Isoform of Q9CX13, Cornichon homolog 4 (Drosophila), isoform CRA_a OS=Mus musculus OX=10090 GN=Cnih4 PE=1 SV=1;sp|Q9CX13|CNIH4_MOUSE Protein cornichon homolog 4 OS=Mus musculus OX=10090 GN=Cnih4 PE=2 SV=1\\"\"\"\"\""	Cnih4	2	1	1	9.22	11285.4	1585.1	0.0082509	7.11519	9303.2	13478	11075	0	0	4755.3
S4R215;S4R2G0;D3Z519;D3Z2W1;D3YWQ0	diacylglycerol kinase, iota	\\tr|S4R215|S4R215_MOUSE Isoform of D3YWQ0, Diacylglycerol kinase OS=Mus musculus OX=10090 GN=Dgki PE=1 SV=1;tr|S4R2G0|S4R2G0_MOUSE Isoform of D3YWQ0, Diacylglycerol kinase OS=Mus musculus OX=10090 GN=Dgki PE=1 SV=1;tr|D3Z519|D3Z519_MOUSE Isoform of D3YWQ0, \\"\"\"\"\""	Dgki	5	1	1	64.591	103804	15171.6	0.00036993	6.84152	93551	100690	117170	7584.8	19293	18637
Q9JJZ2	tubulin, alpha 8	sp|Q9JJZ2|TBA8_MOUSE Tubulin alpha-8 chain OS=Mus musculus OX=10090 GN=Tuba8 PE=1 SV=1	Tuba8	1	20	6	50.051	2.71217e+07	4.71797e+06	0.000152583	5.74859	26349000	25021000	29995000	3520400	5196200	5437300
A0A0U1RQA2	hydroxy-delta-5-steroid dehydrogenase, 3 beta- and steroid delta-isomerase 7	\\tr|A0A0U1RQA2|A0A0U1RQA2_MOUSE Isoform of Q9EQC1, 3 beta-hydroxysteroid dehydrogenase type 7 (Fragment) OS=Mus musculus OX=10090 GN=Hsd3b7 PE=1 SV=1\\"\"\"\"\""	Hsd3b7	1	1	1	15.828	459080	79975.7	0.00132557	5.74017	504870	368370	504000	52842	97757	89328
Q8C8C1	receptor transporter protein 1	sp|Q8C8C1|RTP1_MOUSE Receptor-transporting protein 1 OS=Mus musculus OX=10090 GN=Rtp1 PE=1 SV=1	Rtp1	1	1	1	30.732	205767	37517	4.83e-05	5.48448	199270	214420	203610	24372	36829	51350
Q04857	collagen, type VI, alpha 1	sp|Q04857|CO6A1_MOUSE Collagen alpha-1(VI) chain OS=Mus musculus OX=10090 GN=Col6a1 PE=1 SV=1	Col6a1	1	29	29	108.49	6.05037e+07	1.13662e+07	0.000110087	5.32314	59688000	56243000	65580000	7885500	12797000	13416000
Q810S6;J3QP08;A0A087WP11	H2A histone family member L1E	tr|Q810S6|Q810S6_MOUSE Histone H2A OS=Mus musculus OX=10090 GN=H2al1e PE=2 SV=1;tr|J3QP08|J3QP08_MOUSE Histone H2A OS=Mus musculus OX=10090 GN=H2al1k PE=3 SV=1;tr|A0A087WP11|A0A087WP11_MOUSE Histone H2A OS=Mus musculus OX=10090 GN=H2al1b PE=3 SV=1	H2al1e	3	6	0	12.088	1.06261e+07	2.28957e+06	7.9e-05	4.64108	10494000	9903200	11481000	1878500	2557000	2433200
G3UW85	ERH mRNA splicing and mitosis factor	\\tr|G3UW85|G3UW85_MOUSE Isoform of P84089, Enhancer of rudimentary homolog OS=Mus musculus OX=10090 GN=Erh PE=1 SV=1\\"\"\"\"\""	Erh	1	9	1	14.355	225347	48825.3	0.00120475	4.61527	252330	183900	239810	39771	54346	52359
P11087;P11087-2	collagen, type I, alpha 1	\\sp|P11087|CO1A1_MOUSE Collagen alpha-1(I) chain OS=Mus musculus OX=10090 GN=Col1a1 PE=1 SV=4;sp|P11087-2|CO1A1_MOUSE Isoform of P11087, Isoform 2 of Collagen alpha-1(I) chain OS=Mus musculus OX=10090 GN=Col1a1\\"\"\"\"\""	Col1a1	2	14	14	138.03	2.10863e+07	4684600	3.51e-05	4.5012	20748000	20145000	22366000	3815600	4829700	5408500
Q9CQ70	H2A histone family member L2A	sp|Q9CQ70|H2AB1_MOUSE Histone H2A-Bbd type 1 OS=Mus musculus OX=10090 GN=H2afb1 PE=1 SV=1	H2al2a	2	6	6	12.842	67797000	1.55793e+07	0.000175404	4.35173	67234000	62348000	73809000	11702000	18347000	16689000
P12804	fibrinogen-like protein 2	sp|P12804|FGL2_MOUSE Fibroleukin OS=Mus musculus OX=10090 GN=Fgl2 PE=1 SV=1	Fgl2	1	1	1	48.95	113293	26436.7	0.000762155	4.2853	106170	101860	131850	27996	25132	26182
A2AX52	collagen, type VI, alpha 4	sp|A2AX52|CO6A4_MOUSE Collagen alpha-4(VI) chain OS=Mus musculus OX=10090 GN=Col6a4 PE=1 SV=2	Col6a4	2	31	31	250.8	2.84217e+07	6677000	4.25e-05	4.25665	28186000	26931000	30148000	5444400	7088000	7498600
P11404	fatty acid binding protein 3, muscle and heart	\\sp|P11404|FABPH_MOUSE Fatty acid-binding protein, heart OS=Mus musculus OX=10090 GN=Fabp3 PE=1 SV=5\\"\"\"\"\""	Fabp3	1	4	4	14.819	1864100	439087	0.00011839	4.24539	1879100	1725100	1988100	324300	507620	485340
P19137	laminin, alpha 1	sp|P19137|LAMA1_MOUSE Laminin subunit alpha-1 OS=Mus musculus OX=10090 GN=Lama1 PE=1 SV=2	Lama1	1	52	52	338.14	51704000	1.21856e+07	0.000125468	4.24303	50370000	48722000	56020000	9129900	13393000	14034000
P10856	transition protein 1	sp|P10856|STP1_MOUSE Spermatid nuclear transition protein 1 OS=Mus musculus OX=10090 GN=Tnp1 PE=2 SV=2	Tnp1	1	4	4	6.4074	1.21607e+08	28915000	0.000416452	4.20566	133910000	116910000	114000000	17496000	31901000	37348000
J3QQ16;A0A087WS16;E9PWQ3;D3YWD1	collagen, type VI, alpha 3	\\tr|J3QQ16|J3QQ16_MOUSE Isoform of E9PWQ3, Collagen, type VI, alpha 3 OS=Mus musculus OX=10090 GN=Col6a3 PE=1 SV=1;tr|A0A087WS16|A0A087WS16_MOUSE Isoform of E9PWQ3, Collagen, type VI, alpha 3 OS=Mus musculus OX=10090 GN=Col6a3 PE=1 SV=1;tr|E9PWQ3|E9PWQ3_MOU\\"\"\"\"\""	Col6a3	4	66	66	288.69	9.33907e+07	22316000	4.46e-05	4.18492	91143000	89745000	99284000	17886000	23872000	25190000
P40630;A0A0R4J1N9;D3Z0F3	transcription factor A, mitochondrial	\\sp|P40630|TFAM_MOUSE Transcription factor A, mitochondrial OS=Mus musculus OX=10090 GN=Tfam PE=1 SV=2;tr|A0A0R4J1N9|A0A0R4J1N9_MOUSE Isoform of P40630, Transcription factor A, mitochondrial OS=Mus musculus OX=10090 GN=Tfam PE=1 SV=1;tr|D3Z0F3|D3Z0F3_MOUSE \\"\"\"\"\""	Tfam	4	24	3	27.987	1.49227e+08	3.92447e+07	6.48e-05	3.80247	138210000	154700000	154770000	33455000	40031000	44248000
A8DUK4;E9Q223;P02089;P02088	hemoglobin, beta adult s chain;hemoglobin, beta adult t chain	\\tr|A8DUK4|A8DUK4_MOUSE Beta-globin OS=Mus musculus OX=10090 GN=Hbb-bs PE=1 SV=1;tr|E9Q223|E9Q223_MOUSE Isoform of A8DUK4, Hemoglobin, beta adult s chain (Fragment) OS=Mus musculus OX=10090 GN=Hbb-bs PE=1 SV=1;sp|P02089|HBB2_MOUSE Hemoglobin subunit beta-2 \\"\"\"\"\""	Hbb-bs;Hbb-bt	5	9	7	15.748	2.55053e+07	6.84657e+06	4.39e-05	3.72527	24123000	26587000	25806000	5585100	7208200	7746400
Q01149	collagen, type I, alpha 2	sp|Q01149|CO1A2_MOUSE Collagen alpha-2(I) chain OS=Mus musculus OX=10090 GN=Col1a2 PE=1 SV=2	Col1a2	2	11	11	129.56	1.49513e+07	4.05847e+06	0.000144379	3.68398	14722000	13937000	16195000	3296700	4278600	4600100
Q8CHZ9;B9EJ57;A0A096P6K7	mitochondrial transcription termination factor 1a	\\sp|Q8CHZ9|MTF1A_MOUSE Transcription termination factor 1a, mitochondrial OS=Mus musculus OX=10090 GN=Mterf1a PE=2 SV=1;sp|B9EJ57|MTF1B_MOUSE Transcription termination factor 1b, mitochondrial OS=Mus musculus OX=10090 GN=Mterf1b PE=2 SV=1;tr|A0A096P6K7|A0A0\\"\"\"\"\""	Mterf1a	3	4	4	43.814	1142800	311020	5.4e-05	3.67435	1160000	1098500	1169900	231200	354430	347430
Q91YE9-2;A0A1W2P7E9;A0A1W2P782;A0A1W2P6J4	5'-nucleotidase, cytosolic IB	\\sp|Q91YE9-2|5NT1B_MOUSE Isoform of Q91YE9, Isoform 2 of Cytosolic 5-nucleotidase 1B OS=Mus musculus OX=10090 GN=Nt5c1b;tr|A0A1W2P7E9|A0A1W2P7E9_MOUSE Isoform of Q91YE9, Cytosolic 5-nucleotidase 1B OS=Mus musculus OX=10090 GN=Nt5c1b PE=4 SV=2;tr|A0A1W2P78\\"\"\"\"\""	Nt5c1b	5	30	1	62.944	153887	42786.7	0.000607623	3.59652	162300	138030	161330	27312	46385	54663
E9Q3A0;Q80WG7	tripartite motif-containing 36	\\tr|E9Q3A0|E9Q3A0_MOUSE Isoform of Q80WG7, E3 ubiquitin-protein ligase Trim36 OS=Mus musculus OX=10090 GN=Trim36 PE=1 SV=1;sp|Q80WG7|TRI36_MOUSE E3 ubiquitin-protein ligase Trim36 OS=Mus musculus OX=10090 GN=Trim36 PE=1 SV=2\\"\"\"\"\""	Trim36	2	44	44	81.337	259570000	72324000	0.000121093	3.58899	249010000	249060000	280640000	58735000	76246000	81991000
A2ATM9;Q9R0B6	laminin gamma 3	\\tr|A2ATM9|A2ATM9_MOUSE Isoform of Q9R0B6, Laminin subunit gamma-3 (Fragment) OS=Mus musculus OX=10090 GN=Lamc3 PE=1 SV=1;sp|Q9R0B6|LAMC3_MOUSE Laminin subunit gamma-3 OS=Mus musculus OX=10090 GN=Lamc3 PE=1 SV=2\\"\"\"\"\""	Lamc3	2	19	19	167.36	1.11487e+07	3.12007e+06	6.33e-05	3.57321	10977000	10644000	11825000	2578100	3181900	3600200
Q6P8W9	high-mobility group box 4	sp|Q6P8W9|HMGB4_MOUSE High mobility group protein B4 OS=Mus musculus OX=10090 GN=Hmgb4 PE=2 SV=1	Hmgb4	1	18	18	21.604	6.57573e+07	1.84687e+07	0.000237605	3.56048	63985000	61450000	71837000	14346000	19508000	21552000
Q5M8Q2	H2A histone family member L1D;H2A histone family member L1A;H2A histone family member L1G;H2A histone family member L1C;H2A histone family member L1I;H2A histone family member L1F;H2A histone family member L1H	sp|Q5M8Q2|H2AL1_MOUSE Histone H2A-like 1 OS=Mus musculus OX=10090 GN=H2al1a PE=2 SV=1	H2al1d;H2al1a;H2al1g;H2al1c;H2al1i;H2al1f;H2al1h	2	7	2	12.122	1.86583e+07	5.35853e+06	3.95e-05	3.48198	18300000	17974000	19701000	4531900	5634500	5909200
Q9DAE3	late cornified envelope-like proline-rich 1	sp|Q9DAE3|LELP1_MOUSE Late cornified envelope-like proline-rich protein 1 OS=Mus musculus OX=10090 GN=Lelp1 PE=2 SV=2	Lelp1	1	5	5	12.755	2815200	812080	0.000241073	3.46665	2607800	2753500	3084300	658510	863570	914160
Q9D9Z7	RIKEN cDNA 1700024P04 gene	sp|Q9D9Z7|H2BV_MOUSE Histone H2B subacrosomal variant OS=Mus musculus OX=10090 GN=Subh2bv PE=1 SV=3	1700024P04Rik	1	6	6	14.197	3.55843e+06	1.03412e+06	8.11e-05	3.44103	3479100	3392100	3804100	855850	1135400	1111100
Q3UXJ2;P82198	transforming growth factor, beta induced	\\tr|Q3UXJ2|Q3UXJ2_MOUSE Isoform of P82198, Transforming growth factor-beta-induced protein ig-h3 OS=Mus musculus OX=10090 GN=Tgfbi PE=1 SV=1;sp|P82198|BGH3_MOUSE Transforming growth factor-beta-induced protein ig-h3 OS=Mus musculus OX=10090 GN=Tgfbi PE=1 SV\\"\"\"\"\""	Tgfbi	2	16	16	70.912	1.14103e+07	3.31797e+06	3.44e-05	3.43895	11203000	11004000	12024000	2922200	3262300	3769400
Q8VCT4	carboxylesterase 1D	sp|Q8VCT4|CES1D_MOUSE Carboxylesterase 1D OS=Mus musculus OX=10090 GN=Ces1d PE=1 SV=1	Ces1d	9	9	9	61.787	2.15117e+06	625757	0.000112249	3.4377	2141800	1994500	2317200	553390	637300	686580
L7MTX3;B1AXU1	RIKEN cDNA 1700020N15 gene	tr|L7MTX3|L7MTX3_MOUSE RIKEN cDNA 1700020N15 gene OS=Mus musculus OX=10090 GN=1700020N15Rik PE=4 SV=1;tr|B1AXU1|B1AXU1_MOUSE MCG15151 OS=Mus musculus OX=10090 GN=Gm6812 PE=4 SV=1	1700020N15Rik	2	4	4	12.991	1.77093e+07	5194000	0.000130839	3.40957	17549000	16506000	19073000	4514600	5068800	5998600
Q02788;D3Z7D5	collagen, type VI, alpha 2	\\sp|Q02788|CO6A2_MOUSE Collagen alpha-2(VI) chain OS=Mus musculus OX=10090 GN=Col6a2 PE=1 SV=3;tr|D3Z7D5|D3Z7D5_MOUSE Isoform of Q02788, Collagen alpha-2(VI) chain OS=Mus musculus OX=10090 GN=Col6a2 PE=1 SV=1\\"\"\"\"\""	Col6a2	2	28	28	110.33	76063000	22450000	0.000171199	3.38811	80864000	69643000	77682000	18259000	24018000	25073000
B1AT01	RIKEN cDNA 1700084M14 gene	tr|B1AT01|B1AT01_MOUSE RIKEN cDNA 1700084M14 gene OS=Mus musculus OX=10090 GN=1700084M14Rik PE=4 SV=1	1700084M14Rik	1	4	4	8.8446	1.51923e+07	4521700	8.11e-05	3.35987	14743000	14572000	16262000	3902500	4487500	5175100
F8VQJ3;P02468	laminin, gamma 1	\\tr|F8VQJ3|F8VQJ3_MOUSE Isoform of P02468, Laminin subunit gamma-1 OS=Mus musculus OX=10090 GN=Lamc1 PE=1 SV=1;sp|P02468|LAMC1_MOUSE Laminin subunit gamma-1 OS=Mus musculus OX=10090 GN=Lamc1 PE=1 SV=2\\"\"\"\"\""	Lamc1	4	54	54	177.19	4.24043e+07	1.27697e+07	0.000105163	3.32071	41946000	40097000	45170000	10353000	13515000	14441000
A0A1B0GT24	profilin 5	tr|A0A1B0GT24|A0A1B0GT24_MOUSE Profilin OS=Mus musculus OX=10090 GN=Pfn5 PE=3 SV=1	Pfn5	1	4	4	16.834	2.05013e+06	631030	0.000156731	3.24886	2090900	1869800	2189700	555840	650130	687120
Q9JK53	proline arginine-rich end leucine-rich repeat	sp|Q9JK53|PRELP_MOUSE Prolargin OS=Mus musculus OX=10090 GN=Prelp PE=1 SV=2	Prelp	1	1	1	43.292	258037	79715.3	8.24e-05	3.23694	271120	240650	262340	67610	87186	84350
Q923D2;E9PZC3;E9PZC4	biliverdin reductase B (flavin reductase (NADPH))	\\sp|Q923D2|BLVRB_MOUSE Flavin reductase (NADPH) OS=Mus musculus OX=10090 GN=Blvrb PE=1 SV=3;tr|E9PZC3|E9PZC3_MOUSE Isoform of Q923D2, Flavin reductase (NADPH) OS=Mus musculus OX=10090 GN=Blvrb PE=1 SV=1;tr|E9PZC4|E9PZC4_MOUSE Isoform of Q923D2, Flavin reduc\\"\"\"\"\""	Blvrb	4	3	3	22.197	850660	264807	0.00138246	3.21237	824850	772340	954790	165350	299740	329330
E9QAP0;B8JK39	integrin alpha 9	\\tr|E9QAP0|E9QAP0_MOUSE Isoform of B8JK39, Integrin alpha-9 OS=Mus musculus OX=10090 GN=Itga9 PE=1 SV=1;sp|B8JK39|ITA9_MOUSE Integrin alpha-9 OS=Mus musculus OX=10090 GN=Itga9 PE=1 SV=1\\"\"\"\"\""	Itga9	2	1	1	50.691	165957	51757.3	0.000328055	3.20638	166750	153260	177860	39101	53116	63055
F2Z3U6;Q3TJI8;P50172	hydroxysteroid 11-beta dehydrogenase 1	\\tr|F2Z3U6|F2Z3U6_MOUSE Isoform of P50172, Corticosteroid 11-beta-dehydrogenase isozyme 1 (Fragment) OS=Mus musculus OX=10090 GN=Hsd11b1 PE=1 SV=2;tr|Q3TJI8|Q3TJI8_MOUSE Isoform of P50172, Corticosteroid 11-beta-dehydrogenase isozyme 1 OS=Mus musculus OX=10\\"\"\"\"\""	Hsd11b1	3	2	2	23.609	291680	91211.7	0.00719346	3.1978	323130	213450	338460	82222	97776	93637
J3QK56	RIKEN cDNA 4930544D05 gene	tr|J3QK56|J3QK56_MOUSE RIKEN cDNA 4930544D05 gene OS=Mus musculus OX=10090 GN=4930544D05Rik PE=4 SV=1	4930544D05Rik	1	6	1	22.427	5.94913e+06	1.86743e+06	5.1e-05	3.18573	5630500	5962800	6254100	1626300	1909000	2067000
P02469;E9QN70	laminin B1	\\sp|P02469|LAMB1_MOUSE Laminin subunit beta-1 OS=Mus musculus OX=10090 GN=Lamb1 PE=1 SV=3;tr|E9QN70|E9QN70_MOUSE Isoform of P02469, Laminin subunit beta-1 OS=Mus musculus OX=10090 GN=Lamb1 PE=1 SV=1\\"\"\"\"\""	Lamb1	2	34	34	197.09	16831000	5.32803e+06	3.56e-05	3.15895	16485000	16300000	17708000	4655300	5441100	5887700
Q9QZR9	collagen, type IV, alpha 4	sp|Q9QZR9|CO4A4_MOUSE Collagen alpha-4(IV) chain OS=Mus musculus OX=10090 GN=Col4a4 PE=2 SV=1	Col4a4	1	3	3	164.09	2.55413e+06	810470	2.91e-05	3.15142	2549200	2463600	2649600	687230	859130	885050
P08207	S100 calcium binding protein A10 (calpactin)	sp|P08207|S10AA_MOUSE Protein S100-A10 OS=Mus musculus OX=10090 GN=S100a10 PE=1 SV=2	S100a10	1	3	3	11.186	3100500	988107	0.000431789	3.13782	3313700	2732100	3255700	866040	993880	1104400
Q5FWC3-2;Q5FWC3	membrane-spanning 4-domains, subfamily A, member 13	\\sp|Q5FWC3-2|M4A13_MOUSE Isoform of Q5FWC3, Isoform 2 of Membrane-spanning 4-domains subfamily A member 13 OS=Mus musculus OX=10090 GN=Ms4a13;sp|Q5FWC3|M4A13_MOUSE Membrane-spanning 4-domains subfamily A member 13 OS=Mus musculus OX=10090 GN=Ms4a13 PE=2 SV=\\"\"\"\"\""	Ms4a13	2	1	1	19.364	69109.3	22074	0.00545144	3.13066	64448	58326	84554	21820	28022	16380
Q5DU28;Q5DU28-4;Q5DU28-2;Q5DU28-3	pecanex homolog 2	\\sp|Q5DU28|PCX2_MOUSE Pecanex-like protein 2 OS=Mus musculus OX=10090 GN=Pcnx2 PE=2 SV=2;sp|Q5DU28-4|PCX2_MOUSE Isoform of Q5DU28, Isoform 4 of Pecanex-like protein 2 OS=Mus musculus OX=10090 GN=Pcnx2;sp|Q5DU28-2|PCX2_MOUSE Isoform of Q5DU28, Isoform 2 of P\\"\"\"\"\""	Pcnx2	4	2	2	234.13	9382500	3005600	0.000656051	3.12167	9213700	8373800	10560000	2633500	3152700	3230600
Q61559;Q6PKB0	Fc receptor, IgG, alpha chain transporter	\\sp|Q61559|FCGRN_MOUSE IgG receptor FcRn large subunit p51 OS=Mus musculus OX=10090 GN=Fcgrt PE=1 SV=1;tr|Q6PKB0|Q6PKB0_MOUSE Isoform of Q61559, Fcgrt protein OS=Mus musculus OX=10090 GN=Fcgrt PE=1 SV=1\\"\"\"\"\""	Fcgrt	3	4	4	40.092	531093	170567	8.72e-05	3.11368	548170	493590	551520	146810	187420	177470
Q3TLQ0;Q80X35;Q80ZL4;P20357;G3UWW1;G3UZV6	microtubule-associated protein 2	\\tr|Q3TLQ0|Q3TLQ0_MOUSE Isoform of P20357, Microtubule-associated protein OS=Mus musculus OX=10090 GN=Map2 PE=1 SV=1;tr|Q80X35|Q80X35_MOUSE Isoform of P20357, Microtubule-associated protein OS=Mus musculus OX=10090 GN=Map2 PE=1 SV=1;tr|Q80ZL4|Q80ZL4_MOUSE I\\"\"\"\"\""	Map2	10	9	9	52.675	5.82843e+06	1.88633e+06	0.000110274	3.08982	5597800	5618600	6268900	1615000	1978100	2065900
Q9QZZ6	dermatopontin	sp|Q9QZZ6|DERM_MOUSE Dermatopontin OS=Mus musculus OX=10090 GN=Dpt PE=1 SV=1	Dpt	1	2	2	23.995	162020	52470.3	0.00115561	3.08778	164980	139360	181720	43218	59203	54990
Q9EPR5;D3YYF4;Q8BI74	sortilin-related VPS10 domain containing receptor 2	\\sp|Q9EPR5|SORC2_MOUSE VPS10 domain-containing receptor SorCS2 OS=Mus musculus OX=10090 GN=Sorcs2 PE=1 SV=2;tr|D3YYF4|D3YYF4_MOUSE Isoform of Q9EPR5, VPS10 domain-containing receptor SorCS2 (Fragment) OS=Mus musculus OX=10090 GN=Sorcs2 PE=1 SV=8;tr|Q8BI74|Q\\"\"\"\"\""	Sorcs2	3	2	2	128.9	272273	89830.3	0.000636393	3.03094	246590	308940	261290	91510	89615	88366
Q61292	laminin, beta 2	sp|Q61292|LAMB2_MOUSE Laminin subunit beta-2 OS=Mus musculus OX=10090 GN=Lamb2 PE=1 SV=2	Lamb2	4	63	63	196.58	4.84813e+07	1.62143e+07	0.000109784	2.99003	47129000	46497000	51818000	13723000	16790000	18130000
P04919-2;P04919	solute carrier family 4 (anion exchanger), member 1	\\sp|P04919-2|B3AT_MOUSE Isoform of P04919, Isoform 2 of Band 3 anion transport protein OS=Mus musculus OX=10090 GN=Slc4a1;sp|P04919|B3AT_MOUSE Band 3 anion transport protein OS=Mus musculus OX=10090 GN=Slc4a1 PE=1 SV=1\\"\"\"\"\""	Slc4a1	2	9	9	94.233	5.03213e+06	1692700	7.77e-05	2.97284	4916600	4932800	5247000	1369100	1761500	1947500
P70458	serine (or cysteine) peptidase inhibitor, clade A, member 5	sp|P70458|IPSP_MOUSE Plasma serine protease inhibitor OS=Mus musculus OX=10090 GN=Serpina5 PE=1 SV=2	Serpina5	1	12	12	45.599	7.11667e+06	2.42537e+06	6.65e-05	2.93426	7025400	6856600	7468000	2039100	2515200	2721800
P11378	transition protein 2	sp|P11378|STP2_MOUSE Nuclear transition protein 2 OS=Mus musculus OX=10090 GN=Tnp2 PE=2 SV=3	Tnp2	1	6	6	13.117	43649000	14903000	0.0069489	2.92887	42391000	35006000	53550000	11772000	15733000	17204000
E9PV38	carboxylesterase 2G	tr|E9PV38|E9PV38_MOUSE Carboxylic ester hydrolase OS=Mus musculus OX=10090 GN=Ces2g PE=1 SV=1	Ces2g	1	1	1	62.72	153703	53406.3	0.000154966	2.87794	158390	140840	161880	48098	53280	58841
H3BJ97;Q99JR5	tubulointerstitial nephritis antigen-like 1	\\tr|H3BJ97|H3BJ97_MOUSE Isoform of Q99JR5, Tubulointerstitial nephritis antigen-like OS=Mus musculus OX=10090 GN=Tinagl1 PE=1 SV=1;sp|Q99JR5|TINAL_MOUSE Tubulointerstitial nephritis antigen-like OS=Mus musculus OX=10090 GN=Tinagl1 PE=1 SV=1\\"\"\"\"\""	Tinagl1	3	5	5	49.276	1606900	558637	0.000213478	2.87646	1562800	1504200	1753700	509600	547980	618330
Q9D9J3	actin-related protein T1	sp|Q9D9J3|ACTT1_MOUSE Actin-related protein T1 OS=Mus musculus OX=10090 GN=Actrt1 PE=2 SV=1	Actrt1	1	16	16	42.215	17451000	6.11137e+06	0.000836376	2.8555	17741000	15337000	19275000	5086500	6736700	6510900
P20065-2;P20065	thymosin, beta 4, X chromosome	\\sp|P20065-2|TYB4_MOUSE Isoform of P20065, Isoform Short of Thymosin beta-4 OS=Mus musculus OX=10090 GN=Tmsb4x;sp|P20065|TYB4_MOUSE Thymosin beta-4 OS=Mus musculus OX=10090 GN=Tmsb4x PE=1 SV=1\\"\"\"\"\""	Tmsb4x	2	5	4	5.0526	2.59967e+06	910763	0.00131255	2.85438	2605600	2275800	2917600	710790	1000400	1021100
Q3TT92;Q62188;E9PWE8	dihydropyrimidinase-like 3	\\tr|Q3TT92|Q3TT92_MOUSE Isoform of Q62188, Dihydropyrimidinase-related protein 3 OS=Mus musculus OX=10090 GN=Dpysl3 PE=1 SV=1;sp|Q62188|DPYL3_MOUSE Dihydropyrimidinase-related protein 3 OS=Mus musculus OX=10090 GN=Dpysl3 PE=1 SV=1;tr|E9PWE8|E9PWE8_MOUSE Iso\\"\"\"\"\""	Dpysl3	5	21	16	61.779	2.56807e+07	9020700	9.08e-05	2.84686	25647000	24345000	27050000	7735100	9203000	10124000
Q8K2I3	flavin containing monooxygenase 2	sp|Q8K2I3|FMO2_MOUSE Dimethylaniline monooxygenase [N-oxide-forming] 2 OS=Mus musculus OX=10090 GN=Fmo2 PE=1 SV=3	Fmo2	2	5	5	60.974	1257000	446073	0.000644761	2.81792	1264900	1117900	1388200	384240	477890	476090
Q64435;K9J7B2	UDP glucuronosyltransferase 1 family, polypeptide A7C;UDP glucuronosyltransferase 1 family, polypeptide A6A	sp|Q64435|UD16_MOUSE UDP-glucuronosyltransferase 1-6 OS=Mus musculus OX=10090 GN=Ugt1a6 PE=1 SV=1;tr|K9J7B2|K9J7B2_MOUSE UDP-glucuronosyltransferase OS=Mus musculus OX=10090 GN=Ugt1a6b PE=1 SV=1	Ugt1a7c;Ugt1a6a	2	7	3	60.438	1.51067e+06	542157	0.0117136	2.7864	1239900	1929200	1362900	465120	503830	657520
Q0P5Y3	tubulin polymerization-promoting protein family member 2	sp|Q0P5Y3|TPPP2_MOUSE Tubulin polymerization-promoting protein family member 2 OS=Mus musculus OX=10090 GN=Tppp2 PE=2 SV=1	Tppp2	1	10	10	18.681	7.53433e+06	2709000	0.000480924	2.78122	7504800	6877500	8220700	2215100	2856400	3055500
Q60675;A0A087WRP2	laminin, alpha 2	\\sp|Q60675|LAMA2_MOUSE Laminin subunit alpha-2 OS=Mus musculus OX=10090 GN=Lama2 PE=1 SV=2;tr|A0A087WRP2|A0A087WRP2_MOUSE Isoform of Q60675, Laminin subunit alpha-2 OS=Mus musculus OX=10090 GN=Lama2 PE=1 SV=1\\"\"\"\"\""	Lama2	3	54	54	343.81	4.84513e+07	17438000	7.94e-05	2.77849	49854000	45397000	50103000	15352000	17892000	19070000
P50289	acrosomal vesicle protein 1	sp|P50289|ASPX_MOUSE Acrosomal protein SP-10 OS=Mus musculus OX=10090 GN=Acrv1 PE=1 SV=2	Acrv1	1	9	9	27.948	1.33827e+08	4.81803e+07	0.000646453	2.77762	126400000	124850000	150230000	42023000	48862000	53656000
E9PXX7;Q91W90;A0A0R4J1Y7	thioredoxin domain containing 5	\\tr|E9PXX7|E9PXX7_MOUSE Isoform of Q91W90, Thioredoxin domain-containing protein 5 OS=Mus musculus OX=10090 GN=Txndc5 PE=1 SV=1;sp|Q91W90|TXND5_MOUSE Thioredoxin domain-containing protein 5 OS=Mus musculus OX=10090 GN=Txndc5 PE=1 SV=2;tr|A0A0R4J1Y7|A0A0R4J1\\"\"\"\"\""	Txndc5	3	9	9	38.532	6.18253e+06	2.22853e+06	0.000102194	2.77426	5836600	6228300	6482700	1931300	2222000	2532300
Q9EQ06;Q9EQ06-2	hydroxysteroid (17-beta) dehydrogenase 11	\\sp|Q9EQ06|DHB11_MOUSE Estradiol 17-beta-dehydrogenase 11 OS=Mus musculus OX=10090 GN=Hsd17b11 PE=1 SV=1;sp|Q9EQ06-2|DHB11_MOUSE Isoform of Q9EQ06, Isoform 2 of Estradiol 17-beta-dehydrogenase 11 OS=Mus musculus OX=10090 GN=Hsd17b11\\"\"\"\"\""	Hsd17b11	5	8	8	32.88	4634700	1.68527e+06	9.73e-05	2.75013	4628900	4396500	4878700	1438700	1756000	1861100
Q80YD3-2	family with sequence similarity 205, member C	\\sp|Q80YD3-2|F205C_MOUSE Isoform of Q80YD3, Isoform 2 of Protein FAM205C OS=Mus musculus OX=10090 GN=Fam205c\\"\"\"\"\""	Fam205c	1	16	1	41.415	7.57233e+06	2.75603e+06	0.000491886	2.74755	7353100	6959200	8404700	2415200	2990600	2862300
Q9CQX0;D3Z0Y8	OTU domain, ubiquitin aldehyde binding 2	\\sp|Q9CQX0|OTUB2_MOUSE Ubiquitin thioesterase OTUB2 OS=Mus musculus OX=10090 GN=Otub2 PE=1 SV=1;tr|D3Z0Y8|D3Z0Y8_MOUSE Isoform of Q9CQX0, Ubiquitin thioesterase OS=Mus musculus OX=10090 GN=Otub2 PE=1 SV=1\\"\"\"\"\""	Otub2	3	11	11	27.3	12634000	4598600	0.000358514	2.74736	12359000	11711000	13832000	3975600	4656400	5163800
P08122	collagen, type IV, alpha 2	sp|P08122|CO4A2_MOUSE Collagen alpha-2(IV) chain OS=Mus musculus OX=10090 GN=Col4a2 PE=1 SV=4	Col4a2	2	6	6	167.32	5.27397e+06	1924700	6.69e-05	2.74015	5268400	5039200	5514300	1698900	1900000	2175200
O35114	scavenger receptor class B, member 2	sp|O35114|SCRB2_MOUSE Lysosome membrane protein 2 OS=Mus musculus OX=10090 GN=Scarb2 PE=1 SV=3	Scarb2	1	4	4	54.043	2.19337e+06	800803	1.58e-05	2.73895	2108600	2210700	2260800	748930	788450	865030
Q6VSS7	reproductive homeobox 8	tr|Q6VSS7|Q6VSS7_MOUSE Reproductive homeobox 8 OS=Mus musculus OX=10090 GN=Rhox8 PE=1 SV=1	Rhox8	1	2	2	35.898	2.01953e+06	738100	0.000270266	2.73612	2106400	1948300	2003900	547030	835780	831490
P48774;E9PVM7;E9PV63	glutathione S-transferase, mu 5	\\sp|P48774|GSTM5_MOUSE Glutathione S-transferase Mu 5 OS=Mus musculus OX=10090 GN=Gstm5 PE=1 SV=1;tr|E9PVM7|E9PVM7_MOUSE Isoform of P48774, Glutathione S-transferase (Fragment) OS=Mus musculus OX=10090 GN=Gstm5 PE=1 SV=1;tr|E9PV63|E9PV63_MOUSE Isoform of P4\\"\"\"\"\""	Gstm5	5	19	17	26.635	1.85563e+08	6.80177e+07	0.000209385	2.72816	176800000	179250000	200640000	58617000	69324000	76112000
D3YU60;Q91VS7;E9QJW0;A0A0N4SV17;D3YVR3	microsomal glutathione S-transferase 1	\\tr|D3YU60|D3YU60_MOUSE Isoform of Q91VS7, Microsomal glutathione S-transferase 1 OS=Mus musculus OX=10090 GN=Mgst1 PE=1 SV=1;sp|Q91VS7|MGST1_MOUSE Microsomal glutathione S-transferase 1 OS=Mus musculus OX=10090 GN=Mgst1 PE=1 SV=3;tr|E9QJW0|E9QJW0_MOUSE Iso\\"\"\"\"\""	Mgst1	5	2	2	11.687	174840	64401.7	0.000173233	2.71479	163510	171380	189630	60658	69457	63090
P09041	phosphoglycerate kinase 2	sp|P09041|PGK2_MOUSE Phosphoglycerate kinase 2 OS=Mus musculus OX=10090 GN=Pgk2 PE=1 SV=4	Pgk2	1	22	16	44.852	148690000	5.47893e+07	0.000298453	2.71385	140380000	143400000	162290000	47427000	55406000	61535000
Q497J6;Q9DCU0	progestin and adipoQ receptor family member V	\\tr|Q497J6|Q497J6_MOUSE Isoform of Q9DCU0, Membrane progestin receptor gamma OS=Mus musculus OX=10090 GN=Paqr5 PE=2 SV=1;sp|Q9DCU0|PAQR5_MOUSE Membrane progestin receptor gamma OS=Mus musculus OX=10090 GN=Paqr5 PE=2 SV=1\\"\"\"\"\""	Paqr5	2	2	2	36.498	676633	249967	2.41e-05	2.70688	674020	655190	700690	224330	253540	272030
A9C437;Q9R0A1	chloride channel, voltage-sensitive 2	\\tr|A9C437|A9C437_MOUSE Isoform of Q9R0A1, Chloride channel protein OS=Mus musculus OX=10090 GN=Clcn2 PE=1 SV=1;sp|Q9R0A1|CLCN2_MOUSE Chloride channel protein 2 OS=Mus musculus OX=10090 GN=Clcn2 PE=1 SV=2\\"\"\"\"\""	Clcn2	2	3	3	97.697	36752.3	13644	0.00160135	2.69347	40806	32209	37242	13960	10496	16476
Q9DAL7	IQ motif containing F5	sp|Q9DAL7|IQCF5_MOUSE IQ domain-containing protein F5 OS=Mus musculus OX=10090 GN=Iqcf5 PE=2 SV=1	Iqcf5	1	5	5	17.809	1.06271e+06	394993	0.000192028	2.69044	1074100	986720	1127300	336060	432770	416150
Q3U962	collagen, type V, alpha 2	sp|Q3U962|CO5A2_MOUSE Collagen alpha-2(V) chain OS=Mus musculus OX=10090 GN=Col5a2 PE=1 SV=1	Col5a2	1	4	4	145.02	282893	105547	6.26e-05	2.68024	280210	267640	300830	100310	110770	105560
A0A0R4J0R1;O70404	vesicle-associated membrane protein 8	\\tr|A0A0R4J0R1|A0A0R4J0R1_MOUSE Isoform of O70404, Vesicle-associated membrane protein 8 OS=Mus musculus OX=10090 GN=Vamp8 PE=1 SV=1;sp|O70404|VAMP8_MOUSE Vesicle-associated membrane protein 8 OS=Mus musculus OX=10090 GN=Vamp8 PE=1 SV=1\\"\"\"\"\""	Vamp8	3	4	4	11.435	6.64093e+06	2.48993e+06	0.000193827	2.66711	6415000	6363200	7144600	2123400	2585000	2761400
Q9QYL0	histone H1-like protein in spermatids 1	sp|Q9QYL0|HILS1_MOUSE Spermatid-specific linker histone H1-like protein OS=Mus musculus OX=10090 GN=Hils1 PE=1 SV=1	Hils1	1	11	11	19.203	71632000	2.68667e+07	0.000278549	2.6662	67942000	69184000	77770000	22738000	28234000	29628000
P32766	cystatin 8 (cystatin-related epididymal spermatogenic)	sp|P32766|CST8_MOUSE Cystatin-8 OS=Mus musculus OX=10090 GN=Cst8 PE=1 SV=2	Cst8	1	6	6	16.288	2.26797e+07	8533900	0.000322913	2.6576	21070000	22386000	24583000	7456600	8369900	9775200
Q7TSG5;Z4YK11;Q7TSG5-2	SH3 domain containing 21	\\sp|Q7TSG5|SH321_MOUSE SH3 domain-containing protein 21 OS=Mus musculus OX=10090 GN=Sh3d21 PE=1 SV=1;tr|Z4YK11|Z4YK11_MOUSE Isoform of Q7TSG5, SH3 domain-containing protein 21 OS=Mus musculus OX=10090 GN=Sh3d21 PE=1 SV=1;sp|Q7TSG5-2|SH321_MOUSE Isoform of Q\\"\"\"\"\""	Sh3d21	6	43	43	60.323	1.20783e+08	4.56183e+07	0.000272653	2.64769	118850000	112520000	130980000	39580000	47398000	49877000
Q32MG2-2	spermatid associated	\\sp|Q32MG2-2|SPERT_MOUSE Isoform of Q32MG2, Isoform 2 of Spermatid-associated protein OS=Mus musculus OX=10090 GN=Spert\\"\"\"\"\""	Spert	1	38	3	47.528	3.54123e+08	1.34087e+08	9.35e-05	2.641	335910000	355410000	371050000	115870000	138500000	147890000
Q99L96;O70401;H3BL26	tetraspanin 6	\\tr|Q99L96|Q99L96_MOUSE Isoform of O70401, Tetraspanin OS=Mus musculus OX=10090 GN=Tspan6 PE=1 SV=1;sp|O70401|TSN6_MOUSE Tetraspanin-6 OS=Mus musculus OX=10090 GN=Tspan6 PE=1 SV=1;tr|H3BL26|H3BL26_MOUSE Isoform of O70401, Tetraspanin-6 (Fragment) OS=Mus mus\\"\"\"\"\""	Tspan6	4	8	8	27.303	17289000	6.57313e+06	0.000431333	2.63025	17365000	15666000	18836000	5766300	6948200	7004900
O35490	betaine-homocysteine methyltransferase;predicted gene 5096	sp|O35490|BHMT1_MOUSE Betaine--homocysteine S-methyltransferase 1 OS=Mus musculus OX=10090 GN=Bhmt PE=1 SV=1	Bhmt;Gm5096	2	11	11	45.02	3.61153e+06	1377300	0.000114244	2.62218	3679100	3412800	3742700	1169200	1424800	1537900
Q8C6B0;H3BJI7;A0A2R8VI07;Q9D7S5;Q76I24;Q5I0W6;G3X9G9;Q76I26	methyltransferase like 7A1	\\tr|Q8C6B0|Q8C6B0_MOUSE MCG20149, isoform CRA_a OS=Mus musculus OX=10090 GN=Mettl7a1 PE=1 SV=1;tr|H3BJI7|H3BJI7_MOUSE Isoform of Q76I26, Methyltransferase hypoxia-inducible domain-containing 1 OS=Mus musculus OX=10090 GN=Methig1 PE=4 SV=1;tr|A0A2R8VI07|A0A2\\"\"\"\"\""	Mettl7a1	9	4	4	28.096	756190	288903	4.2e-05	2.61744	757340	738260	772970	253000	284950	328760
E9QKL6;P0DOV2	interferon activated gene 204	\\tr|E9QKL6|E9QKL6_MOUSE Isoform of P0DOV2, Interferon-activable protein 204 OS=Mus musculus OX=10090 GN=Ifi204 PE=1 SV=1;sp|P0DOV2|IFI4_MOUSE Interferon-activable protein 204 OS=Mus musculus OX=10090 GN=Ifi204 PE=1 SV=1\\"\"\"\"\""	Ifi204	2	7	2	69.437	1753100	672627	0.000137689	2.60635	1672200	1734300	1852800	566380	712950	738550
E9PWK1;Q9D379	epoxide hydrolase 1, microsomal	\\tr|E9PWK1|E9PWK1_MOUSE Isoform of Q9D379, Epoxide hydrolase OS=Mus musculus OX=10090 GN=Ephx1 PE=1 SV=1;sp|Q9D379|HYEP_MOUSE Epoxide hydrolase 1 OS=Mus musculus OX=10090 GN=Ephx1 PE=1 SV=2\\"\"\"\"\""	Ephx1	4	22	22	50.969	2.16623e+07	8321300	9.54e-05	2.60324	21737000	20452000	22798000	7329200	8617300	9017400
J3QJW4	RIKEN cDNA 4930544D05 gene	\\tr|J3QJW4|J3QJW4_MOUSE Isoform of J3QK56, RIKEN cDNA 4930544D05 gene OS=Mus musculus OX=10090 GN=4930544D05Rik PE=4 SV=1\\"\"\"\"\""	4930544D05Rik	2	6	1	18.274	281563	108922	7.05e-05	2.58498	288670	270440	285580	91996	117150	117620
P70385;A0A1Y7VJ36	hydroxysteroid (17-beta) dehydrogenase 3	\\sp|P70385|DHB3_MOUSE Testosterone 17-beta-dehydrogenase 3 OS=Mus musculus OX=10090 GN=Hsd17b3 PE=1 SV=2;tr|A0A1Y7VJ36|A0A1Y7VJ36_MOUSE Isoform of P70385, Testosterone 17-beta-dehydrogenase 3 (Fragment) OS=Mus musculus OX=10090 GN=Hsd17b3 PE=4 SV=1\\"\"\"\"\""	Hsd17b3	3	5	5	34.33	1549400	599857	0.000268101	2.58295	1627400	1413800	1607000	526310	613370	659890
Q04997	inhibin alpha	sp|Q04997|INHA_MOUSE Inhibin alpha chain OS=Mus musculus OX=10090 GN=Inha PE=1 SV=2	Inha	1	5	5	39.549	5631400	2189700	0.000198146	2.57177	5448500	5426100	6019600	1834100	2353100	2381900
P15265	sperm mitochondria-associated cysteine-rich protein	sp|P15265|MCSP_MOUSE Sperm mitochondrial-associated cysteine-rich protein OS=Mus musculus OX=10090 GN=Smcp PE=2 SV=4	Smcp	1	5	5	14.945	4.21003e+07	1.64883e+07	0.000230699	2.55334	40317000	40615000	45369000	14238000	16822000	18405000
Q6ZQM8;Q62452;D3Z748;E9PXN7	UDP glucuronosyltransferase 1 family, polypeptide A7C	sp|Q6ZQM8|UD17C_MOUSE UDP-glucuronosyltransferase 1-7C OS=Mus musculus OX=10090 GN=Ugt1a7c PE=1 SV=1;sp|Q62452|UD19_MOUSE UDP-glucuronosyltransferase 1-9 OS=Mus musculus OX=10090 GN=Ugt1a9 PE=1 SV=3;tr|D3Z748|D3Z748_MOUSE UDP-glucuronosyltransferase OS=Mus	Ugt1a7c	19	11	7	59.757	1.13007e+07	4.43097e+06	0.000176371	2.55038	11292000	10683000	11927000	3707100	4750700	4835100
P10649;A2AE89;F6WHQ7	glutathione S-transferase, mu 1	\\sp|P10649|GSTM1_MOUSE Glutathione S-transferase Mu 1 OS=Mus musculus OX=10090 GN=Gstm1 PE=1 SV=2;tr|A2AE89|A2AE89_MOUSE Isoform of P10649, Glutathione S-transferase Mu 1 OS=Mus musculus OX=10090 GN=Gstm1 PE=1 SV=2;tr|F6WHQ7|F6WHQ7_MOUSE Isoform of P10649, \\"\"\"\"\""	Gstm1	3	19	13	25.97	26563000	10416000	5.49e-05	2.55021	26014000	25965000	27710000	9110000	10716000	11422000
P17563;Q63836;A0A0R4J135	selenium binding protein 1	\\sp|P17563|SBP1_MOUSE Methanethiol oxidase OS=Mus musculus OX=10090 GN=Selenbp1 PE=1 SV=2;sp|Q63836|SBP2_MOUSE Selenium-binding protein 2 OS=Mus musculus OX=10090 GN=Selenbp2 PE=1 SV=2;tr|A0A0R4J135|A0A0R4J135_MOUSE Isoform of Q63836, Selenium-binding prote\\"\"\"\"\""	Selenbp1	7	10	10	52.513	3.21657e+06	1.26223e+06	0.000233683	2.54831	3237800	2993900	3418000	1098100	1257600	1431000
Q8BJ56-3;Q8BJ56-2;Q8BJ56;E9Q323;E9PZA4	patatin-like phospholipase domain containing 2	\\sp|Q8BJ56-3|PLPL2_MOUSE Isoform of Q8BJ56, Isoform 3 of Patatin-like phospholipase domain-containing protein 2 OS=Mus musculus OX=10090 GN=Pnpla2;sp|Q8BJ56-2|PLPL2_MOUSE Isoform of Q8BJ56, Isoform 2 of Patatin-like phospholipase domain-containing protein 2\\"\"\"\"\""	Pnpla2	5	2	2	47.877	1.25363e+06	494993	0.00549681	2.53262	1074700	1498300	1187900	380850	566270	537860
P01027	complement component 3	sp|P01027|CO3_MOUSE Complement C3 OS=Mus musculus OX=10090 GN=C3 PE=1 SV=3	C3	3	10	6	186.48	1.59983e+06	634317	4.43e-05	2.52213	1546200	1572500	1680800	576710	672660	653580
Q80X83;Q9D9J8	BPI fold containing family A, member 3	\\tr|Q80X83|Q80X83_MOUSE Isoform of Q9D9J8, BPI fold-containing family A member 3 OS=Mus musculus OX=10090 GN=Bpifa3 PE=2 SV=1;sp|Q9D9J8|BPIA3_MOUSE BPI fold-containing family A member 3 OS=Mus musculus OX=10090 GN=Bpifa3 PE=2 SV=1\\"\"\"\"\""	Bpifa3	2	3	3	26.566	1372000	544867	0.000121711	2.51804	1328000	1320900	1467100	495170	542570	596860
P20491	Fc receptor, IgE, high affinity I, gamma polypeptide	sp|P20491|FCERG_MOUSE High affinity immunoglobulin epsilon receptor subunit gamma OS=Mus musculus OX=10090 GN=Fcer1g PE=1 SV=1	Fcer1g	1	2	2	9.6523	586377	233390	0.000519468	2.51242	570130	543470	645530	208760	227480	263930
Q3V3R4	integrin alpha 1	sp|Q3V3R4|ITA1_MOUSE Integrin alpha-1 OS=Mus musculus OX=10090 GN=Itga1 PE=1 SV=2	Itga1	1	4	4	130.81	806393	321187	0.00166597	2.51066	830320	701290	887570	254320	354750	354490
Q8CDE2	calicin	sp|Q8CDE2|CALI_MOUSE Calicin OS=Mus musculus OX=10090 GN=Ccin PE=1 SV=1	Ccin	1	27	27	66.749	5.03793e+07	2.01343e+07	0.000247773	2.50216	49300000	47605000	54233000	17406000	20736000	22261000
P54869	3-hydroxy-3-methylglutaryl-Coenzyme A synthase 2	\\sp|P54869|HMCS2_MOUSE Hydroxymethylglutaryl-CoA synthase, mitochondrial OS=Mus musculus OX=10090 GN=Hmgcs2 PE=1 SV=2\\"\"\"\"\""	Hmgcs2	1	19	18	56.822	16926000	6790900	0.000132482	2.49245	16939000	16010000	17829000	5897200	7026300	7449200
D3Z796;Q9CPX3	lysozyme-like 1	\\tr|D3Z796|D3Z796_MOUSE Isoform of Q9CPX3, Lysozyme OS=Mus musculus OX=10090 GN=Lyzl1 PE=1 SV=1;sp|Q9CPX3|LYZL1_MOUSE Lysozyme-like protein 1 OS=Mus musculus OX=10090 GN=Lyzl1 PE=1 SV=1\\"\"\"\"\""	Lyzl1	2	5	5	11.504	1.56337e+07	6.29727e+06	0.00078828	2.48261	15519000	14110000	17272000	5412200	6601300	6878300
O70200	allograft inflammatory factor 1	sp|O70200|AIF1_MOUSE Allograft inflammatory factor 1 OS=Mus musculus OX=10090 GN=Aif1 PE=1 SV=1	Aif1	2	5	5	16.91	5.18163e+06	2087300	6.32e-05	2.48246	4952200	5101300	5491400	1940100	2138800	2183000
A0A1B0GRS0;A0A1B0GRM9;A0A1B0GT95;B1AS34;Q9CYZ8-2;Q9D032-2;Q9CYZ8;Q3U4B1;B1AS37;Q9D032	single stranded DNA binding protein 4	\\tr|A0A1B0GRS0|A0A1B0GRS0_MOUSE Isoform of Q3U4B1, Single stranded DNA-binding protein 4 OS=Mus musculus OX=10090 GN=Ssbp4 PE=4 SV=1;tr|A0A1B0GRM9|A0A1B0GRM9_MOUSE Isoform of Q3U4B1, Single stranded DNA-binding protein 4 (Fragment) OS=Mus musculus OX=10090 \\"\"\"\"\""	Ssbp4	10	1	1	9.7741	110598	44628.3	0.00590021	2.47815	113050	88984	129760	39298	43384	51203
Q8BM88	cathepsin O	sp|Q8BM88|CATO_MOUSE Cathepsin O OS=Mus musculus OX=10090 GN=Ctso PE=2 SV=1	Ctso	1	2	2	34.723	295943	119747	1.48e-05	2.47139	297440	297620	292770	112360	113510	133370
G3X9T4;Q8VI64;D3Z134	mitochondria localized glutamic acid rich protein	\\tr|G3X9T4|G3X9T4_MOUSE Isoform of Q8VI64, Protein MGARP OS=Mus musculus OX=10090 GN=Mgarp PE=1 SV=1;sp|Q8VI64|HUMMR_MOUSE Protein MGARP OS=Mus musculus OX=10090 GN=Mgarp PE=1 SV=1;tr|D3Z134|D3Z134_MOUSE Isoform of Q8VI64, Protein MGARP OS=Mus musculus OX=1\\"\"\"\"\""	Mgarp	3	3	3	29.067	2.96353e+06	1200300	0.000631092	2.46899	2993800	2669100	3227700	1060100	1195600	1345200
Q9EQ31	lysophosphatidic acid receptor 3	sp|Q9EQ31|LPAR3_MOUSE Lysophosphatidic acid receptor 3 OS=Mus musculus OX=10090 GN=Lpar3 PE=1 SV=1	Lpar3	1	1	1	40.315	65591.3	26889.3	0.024117	2.43922	69564	45571	81639	23403	24976	32289
Q8C0T7	major facilitator superfamily domain containing 9	sp|Q8C0T7|MFSD9_MOUSE Major facilitator superfamily domain-containing protein 9 OS=Mus musculus OX=10090 GN=Mfsd9 PE=2 SV=1	Mfsd9	1	1	1	49.663	130170	53451.7	9.43e-05	2.43524	127960	124950	137600	54421	58122	47812
P54071	isocitrate dehydrogenase 2 (NADP+), mitochondrial	\\sp|P54071|IDHP_MOUSE Isocitrate dehydrogenase [NADP], mitochondrial OS=Mus musculus OX=10090 GN=Idh2 PE=1 SV=3\\"\"\"\"\""	Idh2	4	15	13	50.906	4.82527e+06	1.98463e+06	0.000304096	2.43131	4805700	4478000	5192100	1734400	2067500	2152000
P20152;A0A0A6YWC8	NA	\\sp|P20152|VIME_MOUSE Vimentin OS=Mus musculus OX=10090 GN=Vim PE=1 SV=3;tr|A0A0A6YWC8|A0A0A6YWC8_MOUSE Isoform of P20152, Vimentin OS=Mus musculus OX=10090 GN=Vim PE=1 SV=1\\"\"\"\"\""	NA	26	43	37	53.687	1.07873e+08	4.44113e+07	0.000361264	2.42896	105210000	101260000	117150000	38533000	45980000	48721000
A0A0A6YXP3;A0A0A6YXE3;Q9JKP5;A0A0A6YWB0;G3X9Q0;A0A0A6YVV8	muscleblind like splicing factor 1	\\tr|A0A0A6YXP3|A0A0A6YXP3_MOUSE Isoform of Q9JKP5, Muscleblind-like protein 1 (Fragment) OS=Mus musculus OX=10090 GN=Mbnl1 PE=1 SV=1;tr|A0A0A6YXE3|A0A0A6YXE3_MOUSE Isoform of Q9JKP5, Muscleblind-like protein 1 OS=Mus musculus OX=10090 GN=Mbnl1 PE=1 SV=1;sp|\\"\"\"\"\""	Mbnl1	11	3	3	19.667	355427	146983	0.000424496	2.41813	342340	333820	390120	132090	148050	160810
A0A0R4J0B2;Q8VCI0	phospholipase B domain containing 1	\\tr|A0A0R4J0B2|A0A0R4J0B2_MOUSE Isoform of Q8VCI0, Phospholipase B-like OS=Mus musculus OX=10090 GN=Plbd1 PE=1 SV=1;sp|Q8VCI0|PLBL1_MOUSE Phospholipase B-like 1 OS=Mus musculus OX=10090 GN=Plbd1 PE=1 SV=1\\"\"\"\"\""	Plbd1	3	17	17	63.018	1.04346e+07	4331100	0.000449323	2.40922	10287000	9644700	11372000	3798000	4454800	4740500
Q9D548	zinc finger, CCHC domain containing 13	tr|Q9D548|Q9D548_MOUSE Cellular nucleic acid binding protein 2 OS=Mus musculus OX=10090 GN=Zcchc13 PE=1 SV=1	Zcchc13	1	10	9	18.943	6.19363e+06	2579900	0.000194047	2.40073	6260300	5755900	6564700	2297900	2696800	2745000
Q9JKK7;A0A1L1SU70;Q9JKK7-2;A0A1L1SRR7	tropomodulin 2	\\sp|Q9JKK7|TMOD2_MOUSE Tropomodulin-2 OS=Mus musculus OX=10090 GN=Tmod2 PE=1 SV=2;tr|A0A1L1SU70|A0A1L1SU70_MOUSE Isoform of Q9JKK7, Tropomodulin 2, isoform CRA_c OS=Mus musculus OX=10090 GN=Tmod2 PE=1 SV=1;sp|Q9JKK7-2|TMOD2_MOUSE Isoform of Q9JKK7, Isoform \\"\"\"\"\""	Tmod2	5	11	11	39.51	12199000	5101700	0.00041041	2.39116	11897000	11483000	13217000	4430800	5080100	5794200
Q9DAR6	cysteine-rich perinuclear theca 12	tr|Q9DAR6|Q9DAR6_MOUSE Cysteine-rich perinuclear theca 12 OS=Mus musculus OX=10090 GN=Cypt12 PE=2 SV=1	Cypt12	1	5	5	13.156	4.27267e+07	1.79183e+07	0.000284188	2.38452	42140000	39809000	46231000	16128000	18634000	18993000
Q9D328	transmembrane protein 35A	sp|Q9D328|TM35A_MOUSE Transmembrane protein 35A OS=Mus musculus OX=10090 GN=Tmem35a PE=1 SV=1	Tmem35a	1	5	5	18.505	5.05567e+06	2.12307e+06	0.00030323	2.3813	5175000	4660900	5331100	1859000	2142900	2367300
P48036	annexin A5	sp|P48036|ANXA5_MOUSE Annexin A5 OS=Mus musculus OX=10090 GN=Anxa5 PE=1 SV=1	Anxa5	2	9	9	35.752	6273100	2.63787e+06	0.000467659	2.3781	6172600	5831200	6815500	2260100	2765300	2888200
G5E897	KDEL (Lys-Asp-Glu-Leu) containing 2	\\tr|G5E897|G5E897_MOUSE KDEL (Lys-Asp-Glu-Leu) containing 2, isoform CRA_b OS=Mus musculus OX=10090 GN=Kdelc2 PE=1 SV=1\\"\"\"\"\""	Kdelc2	1	3	3	57.685	1.36787e+06	580550	3.1e-05	2.35615	1349900	1333700	1420000	531200	587150	623300
Q9D9Z1;A3KGG8	kinetochore-localized astrin/SPAG5 binding	\\sp|Q9D9Z1|SKAP_MOUSE Small kinetochore-associated protein OS=Mus musculus OX=10090 GN=Knstrn PE=2 SV=2;tr|A3KGG8|A3KGG8_MOUSE Isoform of Q9D9Z1, Small kinetochore-associated protein OS=Mus musculus OX=10090 GN=Knstrn PE=1 SV=1\\"\"\"\"\""	Knstrn	8	13	13	34.728	1.21897e+07	5.19097e+06	0.000163251	2.34825	11618000	12125000	12826000	4473500	5388400	5711000
P48678;P48678-2;P48678-3	lamin A	\\sp|P48678|LMNA_MOUSE Prelamin-A/C OS=Mus musculus OX=10090 GN=Lmna PE=1 SV=2;sp|P48678-2|LMNA_MOUSE Isoform of P48678, Isoform C of Prelamin-A/C OS=Mus musculus OX=10090 GN=Lmna;sp|P48678-3|LMNA_MOUSE Isoform of P48678, Isoform C2 of Prelamin-A/C OS=Mus mu\\"\"\"\"\""	Lmna	4	60	58	74.237	103105000	4.39217e+07	0.000301865	2.34747	101790000	96765000	110760000	38220000	45472000	48073000
P27786	cytochrome P450, family 17, subfamily a, polypeptide 1	\\sp|P27786|CP17A_MOUSE Steroid 17-alpha-hydroxylase/17,20 lyase OS=Mus musculus OX=10090 GN=Cyp17a1 PE=1 SV=1\\"\"\"\"\""	Cyp17a1	1	12	12	57.637	8047200	3.43073e+06	0.000176048	2.34562	7701900	7935400	8504300	3044500	3358400	3889300
Q9D9J2;E9QA37;A0A2R8W6F3	testis expressed 33	\\sp|Q9D9J2|TEX33_MOUSE Testis-expressed protein 33 OS=Mus musculus OX=10090 GN=Tex33 PE=1 SV=1;tr|E9QA37|E9QA37_MOUSE Isoform of Q9D9J2, Testis-expressed protein 33 OS=Mus musculus OX=10090 GN=Tex33 PE=1 SV=1;tr|A0A2R8W6F3|A0A2R8W6F3_MOUSE Isoform of Q9D9J2\\"\"\"\"\""	Tex33	3	22	22	30.227	89596000	3.82223e+07	0.000256501	2.34407	83655000	91214000	93919000	33314000	38117000	43236000
Q9D5V1	actin-like 11	tr|Q9D5V1|Q9D5V1_MOUSE Actin-like 11 OS=Mus musculus OX=10090 GN=Actl11 PE=2 SV=1	Actl11	1	37	37	130.8	4.53073e+07	1.94147e+07	6.63e-05	2.33367	45016000	45247000	45659000	16819000	19448000	21977000
Q6X4T6;Q925T6-4;D3Z066;D3Z6R6;Q925T6-3;Q925T6-2;H7BX90;H7BX09;D3YWY4;D3Z6T4;D3YZL8;Q6GQT7;Q925T6	glutamate receptor interacting protein 1	\\tr|Q6X4T6|Q6X4T6_MOUSE Isoform of Q925T6, Glutamate receptor-interacting protein 1 OS=Mus musculus OX=10090 GN=Grip1 PE=1 SV=1;sp|Q925T6-4|GRIP1_MOUSE Isoform of Q925T6, Isoform 4 of Glutamate receptor-interacting protein 1 OS=Mus musculus OX=10090 GN=Grip\\"\"\"\"\""	Grip1	16	8	8	68.833	6.14687e+06	2635100	6.84e-05	2.33269	5905500	6137400	6397700	2354800	2693100	2857400
Q8K0U4	heat shock protein 12A	sp|Q8K0U4|HS12A_MOUSE Heat shock 70 kDa protein 12A OS=Mus musculus OX=10090 GN=Hspa12a PE=1 SV=1	Hspa12a	1	9	9	74.87	1.94623e+06	835883	0.000522389	2.32835	1984800	1756400	2097500	755530	852160	899960
Q8BHL8	proteasome (prosome, macropain) inhibitor subunit 1	sp|Q8BHL8|PSMF1_MOUSE Proteasome inhibitor PI31 subunit OS=Mus musculus OX=10090 GN=Psmf1 PE=1 SV=1	Psmf1	1	6	6	29.664	2.95443e+06	1.27277e+06	0.000495421	2.32127	3002200	2705300	3155800	1090600	1317400	1410300
Q99MQ4	asporin	sp|Q99MQ4|ASPN_MOUSE Asporin OS=Mus musculus OX=10090 GN=Aspn PE=1 SV=1	Aspn	1	2	2	42.572	470453	203800	7.75e-05	2.3084	465770	463690	481900	173770	218240	219390
P10493	nidogen 1	sp|P10493|NID1_MOUSE Nidogen-1 OS=Mus musculus OX=10090 GN=Nid1 PE=1 SV=2	Nid1	1	28	27	136.54	2.68997e+07	11686000	0.000176831	2.30187	26957000	25289000	28453000	10431000	11923000	12704000
Q8BW11	protease, serine 58	sp|Q8BW11|PRS58_MOUSE Putative inactive serine protease 58 OS=Mus musculus OX=10090 GN=Prss58 PE=2 SV=1	Prss58	1	2	2	26.865	3692600	1.60903e+06	9.98e-05	2.29492	3741400	3458400	3878000	1531500	1588400	1707200
P31001	desmin	sp|P31001|DESM_MOUSE Desmin OS=Mus musculus OX=10090 GN=Des PE=1 SV=3	Des	1	25	20	53.497	1.66777e+07	7.26887e+06	0.000417202	2.2944	16423000	15582000	18028000	6320800	7499500	7986300
Q3UBX0;D3Z7P2;D3Z3Z2;D3YX08;D3Z0I8	transmembrane protein 109	\\sp|Q3UBX0|TM109_MOUSE Transmembrane protein 109 OS=Mus musculus OX=10090 GN=Tmem109 PE=1 SV=2;tr|D3Z7P2|D3Z7P2_MOUSE Isoform of Q3UBX0, Transmembrane protein 109 (Fragment) OS=Mus musculus OX=10090 GN=Tmem109 PE=1 SV=1;tr|D3Z3Z2|D3Z3Z2_MOUSE Isoform of Q3U\\"\"\"\"\""	Tmem109	5	2	2	26.306	929153	405993	0.00041006	2.28859	905790	866570	1015100	368500	423790	425690
E9Q6L0;J3QP81;A0A087WS18;A0A087WQF1;A0A087WNW8	CLIP associating protein 1	\\tr|E9Q6L0|E9Q6L0_MOUSE Isoform of Q80TV8, CLIP-associating protein 1 OS=Mus musculus OX=10090 GN=Clasp1 PE=1 SV=2;tr|J3QP81|J3QP81_MOUSE Isoform of Q80TV8, CLIP-associating protein 1 OS=Mus musculus OX=10090 GN=Clasp1 PE=1 SV=1;tr|A0A087WS18|A0A087WS18_MOU\\"\"\"\"\""	Clasp1	7	45	1	160.23	116647	51172.3	0.000967387	2.27944	110960	114810	124170	46237	63939	43341
Q9JM51	prostaglandin E synthase	sp|Q9JM51|PTGES_MOUSE Prostaglandin E synthase OS=Mus musculus OX=10090 GN=Ptges PE=1 SV=1	Ptges	1	2	2	17.285	650923	285790	0.000178142	2.27762	668070	602720	681980	275730	309600	272040
O54794	aquaporin 7	sp|O54794|AQP7_MOUSE Aquaporin-7 OS=Mus musculus OX=10090 GN=Aqp7 PE=1 SV=1	Aqp7	1	1	1	32.667	2.11117e+06	928577	0.000759688	2.27355	2292500	1928200	2112800	811300	912730	1061700
P70195	proteasome (prosome, macropain) subunit, beta type 7	sp|P70195|PSB7_MOUSE Proteasome subunit beta type-7 OS=Mus musculus OX=10090 GN=Psmb7 PE=1 SV=1	Psmb7	1	7	7	29.891	21762000	9.57223e+06	0.000436917	2.27345	21577000	20201000	23508000	8384900	9852800	10479000
P16563;D3YVR2;Q9D2T2	cysteine-rich secretory protein 2	\\sp|P16563|CRIS2_MOUSE Cysteine-rich secretory protein 2 OS=Mus musculus OX=10090 GN=Crisp2 PE=1 SV=1;tr|D3YVR2|D3YVR2_MOUSE Isoform of P16563, Cysteine-rich secretory protein 2 (Fragment) OS=Mus musculus OX=10090 GN=Crisp2 PE=4 SV=1;tr|Q9D2T2|Q9D2T2_MOUSE \\"\"\"\"\""	Crisp2	3	11	11	27.605	26882000	1.18577e+07	0.000508277	2.26706	26661000	24991000	28994000	10088000	12547000	12938000
Q8C2S0;A0A0A0MQB2	ubiquitin specific peptidase 44	\\sp|Q8C2S0|UBP44_MOUSE Ubiquitin carboxyl-terminal hydrolase 44 OS=Mus musculus OX=10090 GN=Usp44 PE=2 SV=3;tr|A0A0A0MQB2|A0A0A0MQB2_MOUSE Isoform of Q8C2S0, Ubiquitin carboxyl-terminal hydrolase 44 OS=Mus musculus OX=10090 GN=Usp44 PE=4 SV=1\\"\"\"\"\""	Usp44	2	2	2	80.478	96619	42641	0.000116294	2.26582	95518	101100	93239	37190	46008	44725
P04441-2;P04441	CD74 antigen (invariant polypeptide of major histocompatibility complex, class II antigen-associated)	\\sp|P04441-2|HG2A_MOUSE Isoform of P04441, Isoform Short of H-2 class II histocompatibility antigen gamma chain OS=Mus musculus OX=10090 GN=Cd74;sp|P04441|HG2A_MOUSE H-2 class II histocompatibility antigen gamma chain OS=Mus musculus OX=10090 GN=Cd74 PE=1 S\\"\"\"\"\""	Cd74	2	2	2	24.454	480267	212073	8.31e-05	2.26461	471200	466750	502850	188380	221820	226020
P09470;F6QCP8;P09470-2	angiotensin I converting enzyme (peptidyl-dipeptidase A) 1	\\sp|P09470|ACE_MOUSE Angiotensin-converting enzyme OS=Mus musculus OX=10090 GN=Ace PE=1 SV=3;tr|F6QCP8|F6QCP8_MOUSE Isoform of P09470, Angiotensin-converting enzyme (Fragment) OS=Mus musculus OX=10090 GN=Ace PE=1 SV=1;sp|P09470-2|ACE_MOUSE Isoform of P09470\\"\"\"\"\""	Ace	3	34	32	150.92	1.33337e+08	5.89433e+07	0.000205075	2.26212	130300000	128360000	141350000	51214000	60553000	65063000
Q8C633	calcium binding protein, spermatid specific 1	sp|Q8C633|CABS1_MOUSE Calcium-binding and spermatid-specific protein 1 OS=Mus musculus OX=10090 GN=Cabs1 PE=1 SV=1	Cabs1	1	16	16	42.301	29194000	1.29073e+07	0.000136155	2.26181	28482000	28395000	30705000	11338000	13153000	14231000
Q8CDC8	four and a half LIM domains 4	tr|Q8CDC8|Q8CDC8_MOUSE Four and a half LIM domains 4 OS=Mus musculus OX=10090 GN=Fhl4 PE=1 SV=1	Fhl4	1	12	10	31.896	27240000	1.20463e+07	0.000665238	2.26127	26498000	25200000	30022000	10807000	12243000	13089000
Q8R4N0	citrate lyase beta like	\\sp|Q8R4N0|CLYBL_MOUSE Citramalyl-CoA lyase, mitochondrial OS=Mus musculus OX=10090 GN=Clybl PE=1 SV=2\\"\"\"\"\""	Clybl	1	14	14	37.548	9.89223e+07	4.37903e+07	0.000349092	2.259	93429000	95848000	107490000	39768000	44154000	47449000
P68373;P68369	tubulin, alpha 1C	sp|P68373|TBA1C_MOUSE Tubulin alpha-1C chain OS=Mus musculus OX=10090 GN=Tuba1c PE=1 SV=1;sp|P68369|TBA1A_MOUSE Tubulin alpha-1A chain OS=Mus musculus OX=10090 GN=Tuba1a PE=1 SV=1	Tuba1c	2	21	0	49.909	9.36153e+06	4.14977e+06	0.000995979	2.25592	8791500	8832100	10461000	3664900	4276100	4508300
O09035	diazepam binding inhibitor-like 5	sp|O09035|DBIL5_MOUSE Diazepam-binding inhibitor-like 5 OS=Mus musculus OX=10090 GN=Dbil5 PE=1 SV=1	Dbil5	1	7	7	9.8645	37282000	1.65283e+07	0.000670434	2.25564	36480000	34562000	40804000	14340000	17038000	18207000
G3X973;Q8R4Y4-2;Q8R4Y4	stabilin 1	\\tr|G3X973|G3X973_MOUSE Isoform of Q8R4Y4, Stabilin 1, isoform CRA_a OS=Mus musculus OX=10090 GN=Stab1 PE=1 SV=1;sp|Q8R4Y4-2|STAB1_MOUSE Isoform of Q8R4Y4, Isoform 2 of Stabilin-1 OS=Mus musculus OX=10090 GN=Stab1;sp|Q8R4Y4|STAB1_MOUSE Stabilin-1 OS=Mus mus\\"\"\"\"\""	Stab1	3	4	4	276.47	893383	396883	0.000198066	2.25099	905770	839940	934440	350970	399760	439920
Q8BMJ3	eukaryotic translation initiation factor 1A, X-linked	\\sp|Q8BMJ3|IF1AX_MOUSE Eukaryotic translation initiation factor 1A, X-chromosomal OS=Mus musculus OX=10090 GN=Eif1ax PE=2 SV=3\\"\"\"\"\""	Eif1ax	7	9	2	16.46	1757300	782090	0.000295949	2.24693	1778000	1627900	1866000	693050	817840	835380
P07356;B0V2N7;B0V2N5;B0V2N8	annexin A2	\\sp|P07356|ANXA2_MOUSE Annexin A2 OS=Mus musculus OX=10090 GN=Anxa2 PE=1 SV=2;tr|B0V2N7|B0V2N7_MOUSE Isoform of P07356, Annexin (Fragment) OS=Mus musculus OX=10090 GN=Anxa2 PE=1 SV=1;tr|B0V2N5|B0V2N5_MOUSE Isoform of P07356, Annexin (Fragment) OS=Mus muscul\\"\"\"\"\""	Anxa2	6	22	22	38.676	2.83507e+07	1.26337e+07	0.000148673	2.24406	27707000	27572000	29773000	10986000	13018000	13897000
G5E850;P56395	cytochrome b5 type A (microsomal)	\\tr|G5E850|G5E850_MOUSE Isoform of P56395, Cytochrome b-5, isoform CRA_a OS=Mus musculus OX=10090 GN=Cyb5a PE=1 SV=1;sp|P56395|CYB5_MOUSE Cytochrome b5 OS=Mus musculus OX=10090 GN=Cyb5a PE=1 SV=2\\"\"\"\"\""	Cyb5a	3	6	6	11.142	7.94503e+06	3547500	0.000193674	2.23961	7979300	7419100	8436700	3258600	3575300	3808600
P20108	peroxiredoxin 3	\\sp|P20108|PRDX3_MOUSE Thioredoxin-dependent peroxide reductase, mitochondrial OS=Mus musculus OX=10090 GN=Prdx3 PE=1 SV=1\\"\"\"\"\""	Prdx3	1	6	6	28.127	1.00528e+07	4.48987e+06	0.000363007	2.23899	10062000	9289300	10807000	4020400	4733500	4715700
J3QM76;A0A087WSN4;A0A087WSR9;A0A087WQJ9	RIKEN cDNA 1700015G11 gene	\\sp|J3QM76|CC179_MOUSE Coiled-coil domain-containing protein 179 OS=Mus musculus OX=10090 GN=Ccdc179 PE=4 SV=1;tr|A0A087WSN4|A0A087WSN4_MOUSE Isoform of J3QM76, RIKEN cDNA 1700015G11 gene OS=Mus musculus OX=10090 GN=1700015G11Rik PE=4 SV=1;tr|A0A087WSR9|A0A\\"\"\"\"\""	1700015G11Rik	4	2	2	7.928	274117	123003	3.08e-06	2.22851	280100	272910	269340	120160	120810	128040
Q6PFY9-2	CDC14 cell division cycle 14B	\\sp|Q6PFY9-2|CC14B_MOUSE Isoform of Q6PFY9, Isoform 2 of Dual specificity protein phosphatase CDC14B OS=Mus musculus OX=10090 GN=Cdc14b\\"\"\"\"\""	Cdc14b	2	9	1	51.401	93337.3	41883.3	0.0116541	2.22845	102370	72172	105470	32663	49205	43782
Q9CR52	RIKEN cDNA 4933400A11 gene	tr|Q9CR52|Q9CR52_MOUSE RIKEN cDNA 4933400A11 gene OS=Mus musculus OX=10090 GN=4933400A11Rik PE=2 SV=1	4933400A11Rik	1	6	6	33.46	2.56793e+06	1153600	0.000533115	2.22602	2631400	2311100	2761300	1084900	1153800	1222100
Q80VT5	RIKEN cDNA 2610318N02 gene	\\tr|Q80VT5|Q80VT5_MOUSE MCG131172, isoform CRA_a OS=Mus musculus OX=10090 GN=2610318N02Rik PE=2 SV=1\\"\"\"\"\""	2610318N02Rik	1	10	10	34.041	1.09233e+07	4.90783e+06	0.000152063	2.22569	10752000	10556000	11462000	4259300	5117400	5346800
Q8CFB8;Q3ULW8;A0A1L1SRP6	poly (ADP-ribose) polymerase family, member 3	\\tr|Q8CFB8|Q8CFB8_MOUSE Isoform of Q3ULW8, Poly [ADP-ribose] polymerase OS=Mus musculus OX=10090 GN=Parp3 PE=1 SV=1;tr|Q3ULW8|Q3ULW8_MOUSE Poly [ADP-ribose] polymerase OS=Mus musculus OX=10090 GN=Parp3 PE=1 SV=1;tr|A0A1L1SRP6|A0A1L1SRP6_MOUSE Isoform of Q3U\\"\"\"\"\""	Parp3	5	7	7	59.452	1468200	660140	0.000122843	2.22407	1429900	1492700	1482000	566000	672230	742190
A0A2Q2AAE3;Q80Y72-2;Q80Y72	cystatin-like 1	\\tr|A0A2Q2AAE3|A0A2Q2AAE3_MOUSE Isoform of Q80Y72, Cystatin OS=Mus musculus OX=10090 GN=Cstl1 PE=3 SV=1;sp|Q80Y72-2|CSTL1_MOUSE Isoform of Q80Y72, Isoform 1 of Cystatin-like 1 OS=Mus musculus OX=10090 GN=Cstl1;sp|Q80Y72|CSTL1_MOUSE Cystatin-like 1 OS=Mus mu\\"\"\"\"\""	Cstl1	3	2	2	10.04	4.15253e+06	1.87007e+06	0.00099567	2.22053	4168200	3783500	4505900	1549800	2082700	1977700
Q64314;Q64314-2	CD34 antigen	\\sp|Q64314|CD34_MOUSE Hematopoietic progenitor cell antigen CD34 OS=Mus musculus OX=10090 GN=Cd34 PE=1 SV=1;sp|Q64314-2|CD34_MOUSE Isoform of Q64314, Isoform Short of Hematopoietic progenitor cell antigen CD34 OS=Mus musculus OX=10090 GN=Cd34\\"\"\"\"\""	Cd34	2	6	6	40.982	9424600	4.25243e+06	0.00321401	2.21628	9343400	8295400	10635000	3332500	4772600	4652200
A0A1W2P7K9;A0A1W2P6X8;A0A1Y7VK90;Q91YE9;A0A1Y7VJB2;D6REF4;A0A1W2P7V4;A0A1W2P7S7;A0A1W2P710;A0A1W2P893;A0A1W2P7D6;A0A1W2P6R5	5'-nucleotidase, cytosolic IB	\\tr|A0A1W2P7K9|A0A1W2P7K9_MOUSE Isoform of Q91YE9, Cytosolic 5-nucleotidase 1B OS=Mus musculus OX=10090 GN=Nt5c1b PE=4 SV=1;tr|A0A1W2P6X8|A0A1W2P6X8_MOUSE Isoform of Q91YE9, Cytosolic 5-nucleotidase 1B OS=Mus musculus OX=10090 GN=Nt5c1b PE=4 SV=1;tr|A0A1Y\\"\"\"\"\""	Nt5c1b	15	33	4	70.092	6.01743e+07	2.71707e+07	0.000181191	2.21468	59857000	57298000	63368000	23900000	27815000	29797000
D3Z533;Q9D4M9	UDP-N-acetyl-alpha-D-galactosamine:polypeptide N-acetylgalactosaminyltransferase-like 5	\\tr|D3Z533|D3Z533_MOUSE Isoform of Q9D4M9, Inactive polypeptide N-acetylgalactosaminyltransferase-like protein 5 OS=Mus musculus OX=10090 GN=Galntl5 PE=4 SV=1;sp|Q9D4M9|GLTL5_MOUSE Inactive polypeptide N-acetylgalactosaminyltransferase-like protein 5 OS=Mus\\"\"\"\"\""	Galntl5	2	6	6	46.154	4.98767e+06	2.25507e+06	0.000491304	2.21176	5012700	4585900	5364400	1994600	2307000	2463600
P00920	carbonic anhydrase 2	sp|P00920|CAH2_MOUSE Carbonic anhydrase 2 OS=Mus musculus OX=10090 GN=Ca2 PE=1 SV=4	Car2	2	5	5	29.032	3827200	1.73163e+06	3.22e-05	2.21017	3742200	3816800	3922600	1582900	1728900	1883100
P15626;D3YX76	glutathione S-transferase, mu 2	\\sp|P15626|GSTM2_MOUSE Glutathione S-transferase Mu 2 OS=Mus musculus OX=10090 GN=Gstm2 PE=1 SV=2;tr|D3YX76|D3YX76_MOUSE Isoform of P15626, Glutathione S-transferase OS=Mus musculus OX=10090 GN=Gstm2 PE=1 SV=1\\"\"\"\"\""	Gstm2	3	16	7	25.716	1.63567e+07	7412900	0.00015062	2.20651	15626000	16022000	17422000	6830900	7424100	7983700
Q6IQX7-2;Q6IQX7-3;Q6IQX7	chondroitin polymerizing factor	\\sp|Q6IQX7-2|CHSS2_MOUSE Isoform of Q6IQX7, Isoform 2 of Chondroitin sulfate synthase 2 OS=Mus musculus OX=10090 GN=Chpf;sp|Q6IQX7-3|CHSS2_MOUSE Isoform of Q6IQX7, Isoform 3 of Chondroitin sulfate synthase 2 OS=Mus musculus OX=10090 GN=Chpf;sp|Q6IQX7|CHSS2_\\"\"\"\"\""	Chpf	3	3	3	34.986	134840	61215	0.0053937	2.20269	142380	116840	145300	41756	74426	67463
Q9EQF6	dihydropyrimidinase-like 5	sp|Q9EQF6|DPYL5_MOUSE Dihydropyrimidinase-related protein 5 OS=Mus musculus OX=10090 GN=Dpysl5 PE=1 SV=1	Dpysl5	2	13	13	61.516	1.26687e+07	5771300	8.94e-05	2.19511	12472000	12378000	13156000	5162800	5759100	6392000
D3Z390;Q921C5;Q921C5-2	BICD cargo adaptor 2	\\tr|D3Z390|D3Z390_MOUSE Isoform of Q921C5, Bicaudal D homolog 2 (Drosophila), isoform CRA_a OS=Mus musculus OX=10090 GN=Bicd2 PE=1 SV=2;sp|Q921C5|BICD2_MOUSE Protein bicaudal D homolog 2 OS=Mus musculus OX=10090 GN=Bicd2 PE=1 SV=1;sp|Q921C5-2|BICD2_MOUSE Is\\"\"\"\"\""	Bicd2	3	2	2	84.702	281010	128027	0.00171639	2.19492	272370	254110	316550	114590	125150	144340
P11352;A0A0A6YY34;A0A0A6YVV2	glutathione peroxidase 1	\\sp|P11352|GPX1_MOUSE Glutathione peroxidase 1 OS=Mus musculus OX=10090 GN=Gpx1 PE=1 SV=2;tr|A0A0A6YY34|A0A0A6YY34_MOUSE Isoform of P11352, Glutathione peroxidase OS=Mus musculus OX=10090 GN=Gpx1 PE=1 SV=1;tr|A0A0A6YVV2|A0A0A6YVV2_MOUSE Isoform of P11352, G\\"\"\"\"\""	Gpx1	3	7	7	22.329	783767	357180	7.02e-05	2.19431	774540	791850	784910	309910	369100	392530
P52196	thiosulfate sulfurtransferase, mitochondrial	sp|P52196|THTR_MOUSE Thiosulfate sulfurtransferase OS=Mus musculus OX=10090 GN=Tst PE=1 SV=3	Tst	1	15	15	33.466	8.82867e+06	4.02583e+06	0.000163247	2.193	8654000	8575800	9256200	3518300	4091100	4468100
P15508;E9Q397;Q3UGX2	spectrin beta, erythrocytic	\\sp|P15508|SPTB1_MOUSE Spectrin beta chain, erythrocytic OS=Mus musculus OX=10090 GN=Sptb PE=1 SV=4;tr|E9Q397|E9Q397_MOUSE Isoform of P15508, Spectrin beta chain OS=Mus musculus OX=10090 GN=Sptb PE=1 SV=1;tr|Q3UGX2|Q3UGX2_MOUSE Isoform of P15508, Spectrin b\\"\"\"\"\""	Sptb	4	23	19	245.25	4.47387e+06	2042900	6.02e-05	2.18996	4582700	4295800	4543100	1904800	1976700	2247200
B1AWN8	cylicin, basic protein of sperm head cytoskeleton 2	\\tr|B1AWN8|B1AWN8_MOUSE Cylicin, basic protein of sperm head cytoskeleton 2 OS=Mus musculus OX=10090 GN=Cylc2 PE=4 SV=2\\"\"\"\"\""	Cylc2	1	8	8	46.653	2.24413e+07	1.02623e+07	0.00044214	2.18677	22245000	21131000	23948000	8729000	10634000	11424000
P06745	NA	sp|P06745|G6PI_MOUSE Glucose-6-phosphate isomerase OS=Mus musculus OX=10090 GN=Gpi PE=1 SV=4	NA	5	23	23	62.766	4.00647e+07	1.83223e+07	0.00121788	2.18666	40091000	36045000	44058000	15702000	19552000	19713000
Q80W24;D3YV92	family with sequence similarity 71, member D	\\tr|Q80W24|Q80W24_MOUSE Isoform of D3YV92, Family with sequence similarity 71, member D OS=Mus musculus OX=10090 GN=Fam71d PE=2 SV=1;tr|D3YV92|D3YV92_MOUSE Family with sequence similarity 71, member D OS=Mus musculus OX=10090 GN=Fam71d PE=4 SV=1\\"\"\"\"\""	Fam71d	6	10	10	44.866	5.75237e+06	2.63377e+06	0.00038091	2.18408	5891400	5340000	6025700	2258400	2788500	2854400
Q14AA6	RIKEN cDNA 1700009N14 gene	tr|Q14AA6|Q14AA6_MOUSE GTP-binding nuclear protein Ran OS=Mus musculus OX=10090 GN=1700009N14Rik PE=2 SV=1	1700009N14Rik	1	10	1	24.357	842393	385877	2.58e-05	2.18306	858400	816010	852770	368570	371050	418010
Q6PER3	microtubule-associated protein, RP/EB family, member 3	sp|Q6PER3|MARE3_MOUSE Microtubule-associated protein RP/EB family member 3 OS=Mus musculus OX=10090 GN=Mapre3 PE=1 SV=1	Mapre3	3	17	3	31.966	3.15373e+07	14454000	0.000178198	2.18191	29970000	32423000	32219000	13247000	13674000	16441000
F6YMR0;E9PUF2;B1AZP2-3;B7ZNS2;B1AZP2-2;B1AZP2;I1E4X0;H3BJW9	DLG associated protein 4	\\tr|F6YMR0|F6YMR0_MOUSE Isoform of B1AZP2, Disks large-associated protein 4 (Fragment) OS=Mus musculus OX=10090 GN=Dlgap4 PE=1 SV=2;tr|E9PUF2|E9PUF2_MOUSE Isoform of B1AZP2, Disks large-associated protein 4 OS=Mus musculus OX=10090 GN=Dlgap4 PE=1 SV=1;sp|B1\\"\"\"\"\""	Dlgap4	11	10	10	29.521	5850000	2.68517e+06	0.000261972	2.17863	5740600	5609200	6200200	2326600	2763000	2965900
Q8K3I8	defensin beta 19	sp|Q8K3I8|DFB19_MOUSE Beta-defensin 19 OS=Mus musculus OX=10090 GN=Defb19 PE=1 SV=1	Defb19	1	4	4	9.5682	3.93453e+06	1.81213e+06	0.00047694	2.17122	3950500	3646200	4206900	1592200	1826700	2017500
Q7TNL9	coiled-coil-helix-coiled-coil-helix domain containing 10	tr|Q7TNL9|Q7TNL9_MOUSE Coiled-coil-helix-coiled-coil-helix domain-containing 10 OS=Mus musculus OX=10090 GN=Chchd10 PE=1 SV=1	Chchd10	1	1	1	13.812	3.89147e+06	1.79277e+06	0.000622923	2.17065	3764800	3680700	4228900	1538100	1860500	1979700
A0A1B0GX27;O35855;O88374	branched chain aminotransferase 2, mitochondrial	\\tr|A0A1B0GX27|A0A1B0GX27_MOUSE Isoform of O35855, Branched-chain-amino-acid aminotransferase OS=Mus musculus OX=10090 GN=Bcat2 PE=1 SV=1;sp|O35855|BCAT2_MOUSE Branched-chain-amino-acid aminotransferase, mitochondrial OS=Mus musculus OX=10090 GN=Bcat2 PE=1 \\"\"\"\"\""	Bcat2	5	13	13	43.493	11187000	5158300	5.28e-05	2.16874	10931000	11051000	11579000	4667700	5238000	5569200
Q5DTY9	potassium channel tetramerisation domain containing 16	sp|Q5DTY9|KCD16_MOUSE BTB/POZ domain-containing protein KCTD16 OS=Mus musculus OX=10090 GN=Kctd16 PE=1 SV=2	Kctd16	1	6	6	48.972	4.36093e+06	2.01143e+06	3.01e-05	2.16807	4240900	4421300	4420600	1878400	1962700	2193200
Q6IRU2	tropomyosin 4	sp|Q6IRU2|TPM4_MOUSE Tropomyosin alpha-4 chain OS=Mus musculus OX=10090 GN=Tpm4 PE=1 SV=3	Tpm4	1	10	6	28.467	2.07767e+06	961493	0.000548629	2.16087	2134700	1891000	2207300	856140	980440	1047900
F8VQ03	a disintegrin and metallopeptidase domain 3 (cyritestin)	sp|F8VQ03|ADAM3_MOUSE A disintegrin and metallopeptidase domain 3 OS=Mus musculus OX=10090 GN=Adam3 PE=1 SV=1	Adam3	5	25	25	91.443	56856000	26325000	0.000268087	2.15977	54748000	55200000	60620000	23242000	26721000	29012000
D3YVJ1	predicted gene 5901	tr|D3YVJ1|D3YVJ1_MOUSE Chromosome 11 open reading frame 42 OS=Mus musculus OX=10090 GN=Gm5901 PE=4 SV=1	Gm5901	1	6	6	36.62	3.93147e+06	1.82243e+06	0.000458544	2.15726	4002400	3625800	4166200	1590700	1882700	1993900
Q8R3R8	gamma-aminobutyric acid (GABA) A receptor-associated protein-like 1	sp|Q8R3R8|GBRL1_MOUSE Gamma-aminobutyric acid receptor-associated protein-like 1 OS=Mus musculus OX=10090 GN=Gabarapl1 PE=1 SV=2	Gabarapl1	1	3	3	14.044	4.35213e+06	2023800	0.000720174	2.15047	4241100	4080500	4734800	1759200	2029100	2283100
Q497H0;Q497H0-2	zinc finger, AN1-type domain 3	\\sp|Q497H0|ZFAN3_MOUSE AN1-type zinc finger protein 3 OS=Mus musculus OX=10090 GN=Zfand3 PE=2 SV=1;sp|Q497H0-2|ZFAN3_MOUSE Isoform of Q497H0, Isoform 2 of AN1-type zinc finger protein 3 OS=Mus musculus OX=10090 GN=Zfand3\\"\"\"\"\""	Zfand3	2	7	7	25.081	2261100	1.05147e+06	0.000961816	2.15041	2118500	2242600	2422200	844620	1206000	1103800
G3X9I1;Q91VU0;G5E911	family with sequence similarity 3, member C	\\tr|G3X9I1|G3X9I1_MOUSE Isoform of Q91VU0, DNA segment, Chr 6, Wayne State University 176, expressed, isoform CRA_a OS=Mus musculus OX=10090 GN=Fam3c PE=1 SV=1;sp|Q91VU0|FAM3C_MOUSE Protein FAM3C OS=Mus musculus OX=10090 GN=Fam3c PE=1 SV=1;tr|G5E911|G5E911_\\"\"\"\"\""	Fam3c	5	3	3	21.486	308713	143607	0.00097852	2.1497	317680	278950	329510	120990	152150	157680
Q9D517	1-acylglycerol-3-phosphate O-acyltransferase 3	sp|Q9D517|PLCC_MOUSE 1-acyl-sn-glycerol-3-phosphate acyltransferase gamma OS=Mus musculus OX=10090 GN=Agpat3 PE=1 SV=2	Agpat3	5	15	15	43.295	2.30337e+07	1.07276e+07	0.000284199	2.14715	22641000	21832000	24628000	9634700	10790000	11758000
Q9WTP7	adenylate kinase 3	\\sp|Q9WTP7|KAD3_MOUSE GTP:AMP phosphotransferase AK3, mitochondrial OS=Mus musculus OX=10090 GN=Ak3 PE=1 SV=3\\"\"\"\"\""	Ak3	2	14	14	25.426	1.04843e+07	4.89173e+06	0.000330729	2.14326	10656000	9726800	11070000	4353300	5007100	5314800
E9Q616	AHNAK nucleoprotein (desmoyokin)	tr|E9Q616|E9Q616_MOUSE AHNAK nucleoprotein (desmoyokin) OS=Mus musculus OX=10090 GN=Ahnak PE=1 SV=1	Ahnak	1	59	59	604.25	2.62683e+07	12270000	0.000521359	2.14086	26343000	24388000	28074000	10580000	12780000	13450000
Q9DA11	lysozyme-like 6	sp|Q9DA11|LYZL6_MOUSE Lysozyme-like protein 6 OS=Mus musculus OX=10090 GN=Lyzl6 PE=1 SV=1	Lyzl6	1	2	2	16.818	7076600	3308800	0.000327401	2.13872	7052000	6611400	7566400	2973900	3376500	3576000
Q61093	cytochrome b-245, beta polypeptide	sp|Q61093|CY24B_MOUSE Cytochrome b-245 heavy chain OS=Mus musculus OX=10090 GN=Cybb PE=1 SV=1	Cybb	1	2	2	65.304	719057	338187	0.000455305	2.12621	755810	659470	741890	298720	352970	362870
Q5STT6	family with sequence similarity 71, member B	sp|Q5STT6|FA71B_MOUSE Protein FAM71B OS=Mus musculus OX=10090 GN=Fam71b PE=3 SV=3	Fam71b	1	28	28	68.884	1.07833e+08	50731000	0.000801676	2.12559	107060000	100170000	116270000	42592000	53171000	56430000
D3Z3A6;D3YXR5;Q60953-2;Q60953;F7BTZ2	promyelocytic leukemia	\\tr|D3Z3A6|D3Z3A6_MOUSE Isoform of Q60953, Protein PML OS=Mus musculus OX=10090 GN=Pml PE=1 SV=1;tr|D3YXR5|D3YXR5_MOUSE Isoform of Q60953, Protein PML OS=Mus musculus OX=10090 GN=Pml PE=1 SV=1;sp|Q60953-2|PML_MOUSE Isoform of Q60953, Isoform 2 of Protein PM\\"\"\"\"\""	Pml	7	5	5	70.481	1.23927e+06	585330	0.000405761	2.11721	1263900	1175800	1278100	483800	629460	642730
D3Z5N1;D3Z5N0;Q2HJ10	solute carrier family 30 (zinc transporter), member 2	\\tr|D3Z5N1|D3Z5N1_MOUSE Isoform of Q2HJ10, Zinc transporter 2 OS=Mus musculus OX=10090 GN=Slc30a2 PE=4 SV=1;tr|D3Z5N0|D3Z5N0_MOUSE Isoform of Q2HJ10, Zinc transporter 2 OS=Mus musculus OX=10090 GN=Slc30a2 PE=4 SV=1;sp|Q2HJ10|ZNT2_MOUSE Zinc transporter 2 OS\\"\"\"\"\""	Slc30a2	3	2	2	31.69	114943	54344.3	0.00110757	2.11505	107930	125670	111230	53378	46640	63015
A0A1Y7VN40	predicted gene, 30302	tr|A0A1Y7VN40|A0A1Y7VN40_MOUSE Uncharacterized protein OS=Mus musculus OX=10090 GN=Gm30302 PE=4 SV=1	Gm30302	1	31	31	124.15	13883000	6568700	0.000320718	2.11351	13923000	13092000	14634000	5722100	6728400	7255600
Q91X72	hemopexin	sp|Q91X72|HEMO_MOUSE Hemopexin OS=Mus musculus OX=10090 GN=Hpx PE=1 SV=2	Hpx	2	6	6	51.317	1.33687e+06	632677	8e-05	2.11303	1370200	1253400	1387000	623200	625770	649060
Q8BWT1	acetyl-Coenzyme A acyltransferase 2 (mitochondrial 3-oxoacyl-Coenzyme A thiolase)	\\sp|Q8BWT1|THIM_MOUSE 3-ketoacyl-CoA thiolase, mitochondrial OS=Mus musculus OX=10090 GN=Acaa2 PE=1 SV=3\\"\"\"\"\""	Acaa2	1	15	15	41.829	1.36393e+07	6.46027e+06	0.000159992	2.11126	13091000	13463000	14364000	5947300	6284800	7148700
Q9D2R9;A2AEH9	thymosin beta 15a	\\tr|Q9D2R9|Q9D2R9_MOUSE Isoform of A2AEH9, Thymosin beta 15a OS=Mus musculus OX=10090 GN=Tmsb15a PE=2 SV=1;tr|A2AEH9|A2AEH9_MOUSE Thymosin beta 15a OS=Mus musculus OX=10090 GN=Tmsb15a PE=4 SV=1\\"\"\"\"\""	Tmsb15a	2	8	7	5.296	8.44867e+06	4008000	0.000112271	2.10795	8281100	8275300	8789600	3636800	3930700	4456500
P31428;A0A1D5RML1;A0A1D5RM32	dipeptidase 1	\\sp|P31428|DPEP1_MOUSE Dipeptidase 1 OS=Mus musculus OX=10090 GN=Dpep1 PE=1 SV=2;tr|A0A1D5RML1|A0A1D5RML1_MOUSE Isoform of P31428, Dipeptidase (Fragment) OS=Mus musculus OX=10090 GN=Dpep1 PE=1 SV=1;tr|A0A1D5RM32|A0A1D5RM32_MOUSE Isoform of P31428, Dipeptida\\"\"\"\"\""	Dpep1	3	7	7	45.722	4.42107e+06	2.09827e+06	9.4e-05	2.10701	4444600	4228300	4590300	1928000	2083400	2283400
Q9D869	calcineurin-like EF hand protein 2	sp|Q9D869|CHP2_MOUSE Calcineurin B homologous protein 2 OS=Mus musculus OX=10090 GN=Chp2 PE=2 SV=4	Chp2	1	2	2	22.566	161760	76854	0.00340924	2.10474	154790	177940	152550	62585	69517	98460
Q8C5W0-4;Q8C5W0;Q8C5W0-2;Q8C5W0-3	calmin	\\sp|Q8C5W0-4|CLMN_MOUSE Isoform of Q8C5W0, Isoform 4 of Calmin OS=Mus musculus OX=10090 GN=Clmn;sp|Q8C5W0|CLMN_MOUSE Calmin OS=Mus musculus OX=10090 GN=Clmn PE=1 SV=2;sp|Q8C5W0-2|CLMN_MOUSE Isoform of Q8C5W0, Isoform 2 of Calmin OS=Mus musculus OX=10090 GN=\\"\"\"\"\""	Clmn	5	41	41	113.44	5.46403e+07	2.59683e+07	0.000135842	2.10411	54220000	52526000	57175000	23189000	26587000	28129000
Q3UPN1;P29533	vascular cell adhesion molecule 1	\\tr|Q3UPN1|Q3UPN1_MOUSE Isoform of P29533, Vascular cell adhesion protein 1 OS=Mus musculus OX=10090 GN=Vcam1 PE=1 SV=1;sp|P29533|VCAM1_MOUSE Vascular cell adhesion protein 1 OS=Mus musculus OX=10090 GN=Vcam1 PE=1 SV=1\\"\"\"\"\""	Vcam1	4	3	3	81.316	345490	164257	0.00177381	2.10334	335500	314440	386530	140670	178380	173720
Q9CXR1;A0A1Y7VN19	dehydrogenase/reductase (SDR family) member 7	\\sp|Q9CXR1|DHRS7_MOUSE Dehydrogenase/reductase SDR family member 7 OS=Mus musculus OX=10090 GN=Dhrs7 PE=1 SV=2;tr|A0A1Y7VN19|A0A1Y7VN19_MOUSE Isoform of Q9CXR1, Dehydrogenase/reductase SDR family member 7 (Fragment) OS=Mus musculus OX=10090 GN=Dhrs7 PE=1 SV\\"\"\"\"\""	Dhrs7	5	8	8	38.167	11936000	5.69937e+06	0.00072078	2.09427	11501000	11363000	12944000	4834900	6133400	6129800
P97352;A0A0A0MQ90	S100 calcium binding protein A13	\\sp|P97352|S10AD_MOUSE Protein S100-A13 OS=Mus musculus OX=10090 GN=S100a13 PE=1 SV=1;tr|A0A0A0MQ90|A0A0A0MQ90_MOUSE Isoform of P97352, Protein S100-A13 OS=Mus musculus OX=10090 GN=S100a13 PE=1 SV=1\\"\"\"\"\""	S100a13	2	2	2	11.158	560747	268073	0.0046628	2.09176	597370	481950	602920	210870	324480	268870
P0C1V4;J3JS82	transmembrane and coiled-coil domains 2	\\sp|P0C1V4|TMCO2_MOUSE Transmembrane and coiled-coil domain-containing protein 2 OS=Mus musculus OX=10090 GN=Tmco2 PE=1 SV=1;tr|J3JS82|J3JS82_MOUSE Isoform of P0C1V4, MCG49082 OS=Mus musculus OX=10090 GN=Tmco2 PE=1 SV=1\\"\"\"\"\""	Tmco2	2	5	5	20.33	8.40083e+06	4021200	0.000830543	2.08914	8356100	7767600	9078800	3419000	4286600	4358000
Q9R0Y5;Q9R0Y5-2	adenylate kinase 1	\\sp|Q9R0Y5|KAD1_MOUSE Adenylate kinase isoenzyme 1 OS=Mus musculus OX=10090 GN=Ak1 PE=1 SV=1;sp|Q9R0Y5-2|KAD1_MOUSE Isoform of Q9R0Y5, Isoform 2 of Adenylate kinase isoenzyme 1 OS=Mus musculus OX=10090 GN=Ak1\\"\"\"\"\""	Ak1	4	13	13	21.539	1.51653e+07	7.27093e+06	0.000286953	2.08575	15143000	14225000	16128000	6592500	7340900	7879400
Q9CQ19	myosin, light polypeptide 9, regulatory	sp|Q9CQ19|MYL9_MOUSE Myosin regulatory light polypeptide 9 OS=Mus musculus OX=10090 GN=Myl9 PE=1 SV=3	Myl9	1	4	1	19.854	112367	53933	0.000468839	2.08341	120740	109310	107050	61153	50901	49745
B2RXB0	family with sequence similarity 71, member F2	\\tr|B2RXB0|B2RXB0_MOUSE Family with sequence similarity 71, member F2 OS=Mus musculus OX=10090 GN=Fam71f2 PE=2 SV=1\\"\"\"\"\""	Fam71f2	1	5	4	32.844	1.17393e+06	563480	0.000387664	2.08336	1174800	1105900	1241100	484710	599820	605910
Q9QUM9;E0CXB1	proteasome (prosome, macropain) subunit, alpha type 6	\\sp|Q9QUM9|PSA6_MOUSE Proteasome subunit alpha type-6 OS=Mus musculus OX=10090 GN=Psma6 PE=1 SV=1;tr|E0CXB1|E0CXB1_MOUSE Isoform of Q9QUM9, Proteasome endopeptidase complex OS=Mus musculus OX=10090 GN=Psma6 PE=1 SV=1\\"\"\"\"\""	Psma6	3	16	16	27.372	2.13697e+07	1.02805e+07	8.31e-05	2.07865	21112000	21190000	21807000	9090600	10447000	11304000
Q80YU0	abhydrolase domain containing 16B	sp|Q80YU0|ABHGB_MOUSE Protein ABHD16B OS=Mus musculus OX=10090 GN=Abhd16b PE=2 SV=1	Abhd16b	1	7	6	53.297	974453	469557	0.000227778	2.07526	961000	932060	1030300	419470	475090	514110
Q9DA47	transmembrane 239	sp|Q9DA47|TM239_MOUSE Transmembrane protein 239 OS=Mus musculus OX=10090 GN=Tmem239 PE=2 SV=1	Tmem239	1	3	3	17.201	1.76413e+06	851627	0.000420192	2.07148	1649000	1861800	1781600	767530	825490	961860
Q64442	sorbitol dehydrogenase	sp|Q64442|DHSO_MOUSE Sorbitol dehydrogenase OS=Mus musculus OX=10090 GN=Sord PE=1 SV=3	Sord	1	15	15	38.249	79558000	3.84273e+07	0.000567525	2.07035	77594000	74441000	86639000	34705000	39563000	41014000
Q8BVW3	tripartite motif-containing 14	sp|Q8BVW3|TRI14_MOUSE Tripartite motif-containing protein 14 OS=Mus musculus OX=10090 GN=Trim14 PE=1 SV=2	Trim14	1	1	1	49.64	42472.3	20518	0.00169092	2.0699	46803	40402	40212	20327	17207	24020
Q9DBG1	cytochrome P450, family 27, subfamily a, polypeptide 1	\\sp|Q9DBG1|CP27A_MOUSE Sterol 26-hydroxylase, mitochondrial OS=Mus musculus OX=10090 GN=Cyp27a1 PE=1 SV=1\\"\"\"\"\""	Cyp27a1	1	5	5	60.719	2.28867e+06	1.10617e+06	0.000397087	2.06901	2328500	2169900	2367600	943400	1252700	1122400
Q9ERL7;D3YY16;D3Z2F6	glia maturation factor, gamma	\\sp|Q9ERL7|GMFG_MOUSE Glia maturation factor gamma OS=Mus musculus OX=10090 GN=Gmfg PE=1 SV=1;tr|D3YY16|D3YY16_MOUSE Isoform of Q9ERL7, Glia maturation factor gamma OS=Mus musculus OX=10090 GN=Gmfg PE=1 SV=1;tr|D3Z2F6|D3Z2F6_MOUSE Isoform of Q9ERL7, Glia ma\\"\"\"\"\""	Gmfg	3	4	3	16.748	863257	417470	0.000746631	2.06782	850940	821120	917710	354080	411130	487200
Q9Z2U0	proteasome (prosome, macropain) subunit, alpha type 7	sp|Q9Z2U0|PSA7_MOUSE Proteasome subunit alpha type-7 OS=Mus musculus OX=10090 GN=Psma7 PE=1 SV=1	Psma7	1	9	5	27.855	9121800	4.41597e+06	0.000366219	2.06564	8696400	8984900	9684100	3847200	4520600	4880100
Q61830	mannose receptor, C type 1	sp|Q61830|MRC1_MOUSE Macrophage mannose receptor 1 OS=Mus musculus OX=10090 GN=Mrc1 PE=1 SV=2	Mrc1	1	37	37	164.98	2.71923e+07	13168000	0.000203941	2.06503	26822000	25969000	28786000	11843000	13507000	14154000
Q8R3E3-2;Q8R3E3;Q8R3E3-3;B1AT64	WD repeat domain, phosphoinositide interacting 1	\\sp|Q8R3E3-2|WIPI1_MOUSE Isoform of Q8R3E3, Isoform 2 of WD repeat domain phosphoinositide-interacting protein 1 OS=Mus musculus OX=10090 GN=Wipi1;sp|Q8R3E3|WIPI1_MOUSE WD repeat domain phosphoinositide-interacting protein 1 OS=Mus musculus OX=10090 GN=Wipi\\"\"\"\"\""	Wipi1	4	4	4	47.796	3.30003e+06	1.60077e+06	0.000178002	2.06153	3348000	3178200	3373900	1383000	1675200	1744100
Q8C025;D6RCW3;Q8C025-3;D3Z6W4;Q8C025-2;D3YU39	choline phosphotransferase 1	\\sp|Q8C025|CHPT1_MOUSE Cholinephosphotransferase 1 OS=Mus musculus OX=10090 GN=Chpt1 PE=1 SV=1;tr|D6RCW3|D6RCW3_MOUSE Isoform of Q8C025, Cholinephosphotransferase 1 OS=Mus musculus OX=10090 GN=Chpt1 PE=1 SV=1;sp|Q8C025-3|CHPT1_MOUSE Isoform of Q8C025, Isofo\\"\"\"\"\""	Chpt1	6	3	2	44.607	1.04357e+06	506260	7.73e-05	2.06132	1001800	1055700	1073200	463630	507590	547560
Q7M6Y6-2;Q7M6Y6;Q7M6Y6-3	maestro heat-like repeat family member 2B	\\sp|Q7M6Y6-2|MRO2B_MOUSE Isoform of Q7M6Y6, Isoform 2 of Maestro heat-like repeat-containing protein family member 2B OS=Mus musculus OX=10090 GN=Mroh2b;sp|Q7M6Y6|MRO2B_MOUSE Maestro heat-like repeat-containing protein family member 2B OS=Mus musculus OX=10\\"\"\"\"\""	Mroh2b	3	41	41	179.94	28936000	1.40643e+07	0.000225545	2.0574	28461000	27797000	30550000	12488000	14378000	15327000
C0HK80;C0HK79	adipocyte-related X-chromosome expressed sequence 2;adipocyte-related X-chromosome expressed sequence 1	sp|C0HK80|ARXS2_MOUSE Adipocyte-related X-chromosome expressed sequence 2 OS=Mus musculus OX=10090 GN=Arxes2 PE=1 SV=1;sp|C0HK79|ARXS1_MOUSE Adipocyte-related X-chromosome expressed sequence 1 OS=Mus musculus OX=10090 GN=Arxes1 PE=1 SV=1	Arxes2;Arxes1	2	5	5	20.146	4.85367e+06	2359600	0.000552936	2.05699	4827000	4542000	5192000	2065900	2387300	2625600
A0A1B0GR13;G3X9R0	cylicin, basic protein of sperm head cytoskeleton 1	\\tr|A0A1B0GR13|A0A1B0GR13_MOUSE Cylicin, basic protein of sperm head cytoskeleton 1 OS=Mus musculus OX=10090 GN=Cylc1 PE=1 SV=1;tr|G3X9R0|G3X9R0_MOUSE Isoform of A0A1B0GR13, Cylicin, basic protein of sperm head cytoskeleton 1 OS=Mus musculus OX=10090 GN=Cyl\\"\"\"\"\""	Cylc1	2	19	19	71.773	1.11233e+07	5.42037e+06	0.000319545	2.05214	10912000	10768000	11690000	4696900	5480100	6084100
Q9DBX3;Q9DBX3-2	sushi domain containing 2	\\sp|Q9DBX3|SUSD2_MOUSE Sushi domain-containing protein 2 OS=Mus musculus OX=10090 GN=Susd2 PE=1 SV=1;sp|Q9DBX3-2|SUSD2_MOUSE Isoform of Q9DBX3, Isoform 2 of Sushi domain-containing protein 2 OS=Mus musculus OX=10090 GN=Susd2\\"\"\"\"\""	Susd2	3	5	5	90.641	1.48743e+06	725170	0.000244383	2.05115	1460400	1425800	1576100	652990	725720	796800
Q9D8L5	coiled-coil domain containing 91	sp|Q9D8L5|CCD91_MOUSE Coiled-coil domain-containing protein 91 OS=Mus musculus OX=10090 GN=Ccdc91 PE=1 SV=2	Ccdc91	2	31	31	50.006	5.14977e+07	25163000	0.000977347	2.04656	52453000	47015000	55025000	21458000	26173000	27858000
A0A087WPD9;Q3V0U0;A0A087WRL7	RIKEN cDNA 1700057G04 gene	\\tr|A0A087WPD9|A0A087WPD9_MOUSE Isoform of Q3V0U0, Phospholipid scramblase OS=Mus musculus OX=10090 GN=1700057G04Rik PE=3 SV=1;tr|Q3V0U0|Q3V0U0_MOUSE Phospholipid scramblase OS=Mus musculus OX=10090 GN=1700057G04Rik PE=2 SV=1;tr|A0A087WRL7|A0A087WRL7_MOUSE \\"\"\"\"\""	1700057G04Rik	3	2	2	17.688	962670	470520	0.000266114	2.04597	966990	897920	1023100	451340	507340	452880
O55026	ectonucleoside triphosphate diphosphohydrolase 2	sp|O55026|ENTP2_MOUSE Ectonucleoside triphosphate diphosphohydrolase 2 OS=Mus musculus OX=10090 GN=Entpd2 PE=1 SV=2	Entpd2	2	8	8	54.319	4174800	2.04227e+06	8.52e-05	2.0442	4107300	4167700	4249400	1817000	2060400	2249400
G3UYK8;O89053;A0A0U1RPY8	coronin, actin binding protein 1A	\\tr|G3UYK8|G3UYK8_MOUSE Isoform of O89053, Coronin OS=Mus musculus OX=10090 GN=Coro1a PE=1 SV=1;sp|O89053|COR1A_MOUSE Coronin-1A OS=Mus musculus OX=10090 GN=Coro1a PE=1 SV=5;tr|A0A0U1RPY8|A0A0U1RPY8_MOUSE Isoform of O89053, Coronin (Fragment) OS=Mus musculu\\"\"\"\"\""	Coro1a	6	6	5	43.26	691743	338787	0.000248469	2.04182	697950	685050	692230	285570	348310	382480
P19324	serine (or cysteine) peptidase inhibitor, clade H, member 1	sp|P19324|SERPH_MOUSE Serpin H1 OS=Mus musculus OX=10090 GN=Serpinh1 PE=1 SV=3	Serpinh1	4	8	8	46.533	5.17753e+06	2.53587e+06	0.000118893	2.04172	5213600	4931300	5387700	2324900	2551000	2731700
P70190	capping protein (actin filament) muscle Z-line, alpha 3	sp|P70190|CAZA3_MOUSE F-actin-capping protein subunit alpha-3 OS=Mus musculus OX=10090 GN=Capza3 PE=2 SV=1	Capza3	1	14	14	34.952	3.41763e+07	1.67513e+07	0.000409098	2.04022	34602000	31704000	36223000	15103000	16901000	18250000
F5H8M7	cysteine-rich transmembrane module containing 1	\\tr|F5H8M7|F5H8M7_MOUSE Isoform of Q8K353, Cysteine-rich and transmembrane domain-containing protein 1 OS=Mus musculus OX=10090 GN=Cystm1 PE=4 SV=1\\"\"\"\"\""	Cystm1	1	1	1	11.453	1417200	696757	0.000480048	2.03399	1326600	1440000	1485000	626130	669210	794930
Q91ZT8	ankyrin repeat and SOCS box-containing 9	sp|Q91ZT8|ASB9_MOUSE Ankyrin repeat and SOCS box protein 9 OS=Mus musculus OX=10090 GN=Asb9 PE=1 SV=2	Asb9	1	5	5	31.656	2146000	1.05524e+06	0.000925368	2.03365	1966100	2313700	2158200	947230	1024600	1193900
Q61241	testis-specific serine kinase 1	sp|Q61241|TSSK1_MOUSE Testis-specific serine/threonine-protein kinase 1 OS=Mus musculus OX=10090 GN=Tssk1b PE=1 SV=2	Tssk1	1	24	19	41.588	47695000	2.34557e+07	0.000466702	2.03341	47069000	45265000	50751000	20423000	23832000	26112000
P16627	heat shock protein 1-like	sp|P16627|HS71L_MOUSE Heat shock 70 kDa protein 1-like OS=Mus musculus OX=10090 GN=Hspa1l PE=1 SV=4	Hspa1l	1	39	21	70.636	1.49047e+08	7.33763e+07	0.00114354	2.03126	145340000	138590000	163210000	63006000	76102000	81021000
B1AXB9	predicted gene 4907	\\tr|B1AXB9|B1AXB9_MOUSE Predicted gene, EG236749 OS=Mus musculus OX=10090 GN=Gm4907 PE=1 SV=1\\"\"\"\"\""	Gm4907	1	19	15	46.783	8559900	4224700	0.0005649	2.02616	8300600	8138300	9240800	3716300	4347900	4609900
A0A0U1RPG8;A0A0U1RPQ8;F7DE04;Q5EER8;A0A0U1RNG7	potassium channel tetramerisation domain containing 14	\\tr|A0A0U1RPG8|A0A0U1RPG8_MOUSE Isoform of A0A0U1RNG7, Potassium channel tetramerisation domain-containing 14 OS=Mus musculus OX=10090 GN=Kctd14 PE=1 SV=1;tr|A0A0U1RPQ8|A0A0U1RPQ8_MOUSE Isoform of A0A0U1RNG7, Potassium channel tetramerisation domain-contain\\"\"\"\"\""	Kctd14	5	2	2	30.453	147077	72615	0.00300053	2.0254	133880	141690	165660	60432	74685	82728
A0A1L1ST33;B1AUF7;A0A087WQM2;B1AUG0;Q80UI5;Q64143;O08908;P26450	predicted gene, 49337	\\tr|A0A1L1ST33|A0A1L1ST33_MOUSE Uncharacterized protein OS=Mus musculus OX=10090 GN=Gm49337 PE=4 SV=1;tr|B1AUF7|B1AUF7_MOUSE MCG1049117 OS=Mus musculus OX=10090 GN=1700042G07Rik PE=4 SV=1;tr|A0A087WQM2|A0A087WQM2_MOUSE Isoform of P26450, Phosphatidylinosito\\"\"\"\"\""	Gm49337	8	2	2	58.466	265783	131380	0.00212862	2.023	292880	260130	244340	108060	134800	151280
O35425-2;O35425;A0A087WR00	BCL2-related ovarian killer	\\sp|O35425-2|BOK_MOUSE Isoform of O35425, Isoform 2 of Bcl-2-related ovarian killer protein OS=Mus musculus OX=10090 GN=Bok;sp|O35425|BOK_MOUSE Bcl-2-related ovarian killer protein OS=Mus musculus OX=10090 GN=Bok PE=1 SV=1;tr|A0A087WR00|A0A087WR00_MOUSE Iso\\"\"\"\"\""	Bok	4	5	5	21.866	1435500	710077	0.000141441	2.02161	1352200	1453100	1501200	691400	677620	761210
P63011	RAB3A, member RAS oncogene family;RAB3A, member RAS onco family	sp|P63011|RAB3A_MOUSE Ras-related protein Rab-3A OS=Mus musculus OX=10090 GN=Rab3a PE=1 SV=1	Rab3a	1	4	3	24.97	1.13353e+06	560843	0.000676422	2.02112	1202000	1179400	1019200	566030	528630	587870
Q3TTY0;Q3TTY0-3;Q3TTY0-2	phospholipase B1	\\sp|Q3TTY0|PLB1_MOUSE Phospholipase B1, membrane-associated OS=Mus musculus OX=10090 GN=Plb1 PE=1 SV=2;sp|Q3TTY0-3|PLB1_MOUSE Isoform of Q3TTY0, Isoform 3 of Phospholipase B1, membrane-associated OS=Mus musculus OX=10090 GN=Plb1;sp|Q3TTY0-2|PLB1_MOUSE Isofo\\"\"\"\"\""	Plb1	4	50	50	164.54	8.09603e+07	4.00597e+07	0.000484081	2.02099	79932000	76335000	86614000	35303000	40925000	43951000
Q9D9S4	cancer/testis antigen 2	tr|Q9D9S4|Q9D9S4_MOUSE Cancer/testis antigen 2 OS=Mus musculus OX=10090 GN=Ctag2 PE=1 SV=1	Ctag2	2	4	4	23.67	868497	429800	6.84e-05	2.02069	825640	899210	880640	410780	423930	454690
Q9Z2A9;Q9Z2A9-2;A0A087WSM3;Q80WV0	gamma-glutamyltransferase 5	\\sp|Q9Z2A9|GGT5_MOUSE Glutathione hydrolase 5 proenzyme OS=Mus musculus OX=10090 GN=Ggt5 PE=1 SV=2;sp|Q9Z2A9-2|GGT5_MOUSE Isoform of Q9Z2A9, Isoform 2 of Glutathione hydrolase 5 proenzyme OS=Mus musculus OX=10090 GN=Ggt5;tr|A0A087WSM3|A0A087WSM3_MOUSE Isofo\\"\"\"\"\""	Ggt5	5	7	7	61.673	2.35683e+06	1.16837e+06	0.000149622	2.0172	2336200	2298200	2436100	1021800	1223400	1259900
Q9DAL4;E9PXD1;A0A286YDY8;E9PWV1	protease, serine 51	\\tr|Q9DAL4|Q9DAL4_MOUSE Isoform of A0A286YDY8, MCG15876 OS=Mus musculus OX=10090 GN=Prss51 PE=2 SV=1;tr|E9PXD1|E9PXD1_MOUSE Isoform of A0A286YDY8, Protease, serine 51 OS=Mus musculus OX=10090 GN=Prss51 PE=4 SV=1;tr|A0A286YDY8|A0A286YDY8_MOUSE Protease, seri\\"\"\"\"\""	Prss51	4	3	3	24.97	245010	121670	0.000164562	2.01371	234400	254820	245810	120360	110610	134040
D3Z2Z1;F8WIA1;D3Z3M7;F6RCU2	CAP-GLY domain containing linker protein 1	\\tr|D3Z2Z1|D3Z2Z1_MOUSE Isoform of Q922J3, CAP-Gly domain-containing linker protein 1 OS=Mus musculus OX=10090 GN=Clip1 PE=1 SV=1;tr|F8WIA1|F8WIA1_MOUSE Isoform of Q922J3, CAP-Gly domain-containing linker protein 1 OS=Mus musculus OX=10090 GN=Clip1 PE=1 SV=\\"\"\"\"\""	Clip1	4	67	0	160.01	42192000	20953000	0.000495702	2.01365	41356000	39798000	45422000	18745000	21285000	22829000
A2AE20	sperm acrosome associated 5	sp|A2AE20|LYZL5_MOUSE Sperm acrosome-associated protein 5 OS=Mus musculus OX=10090 GN=Spaca5 PE=1 SV=1	Spaca5	1	5	5	18.005	4.36173e+06	2166800	0.00192936	2.01298	4446900	3877600	4760700	1855500	2372300	2272600
Q9D9G7	RIKEN cDNA 1700074P13 gene	tr|Q9D9G7|Q9D9G7_MOUSE 1700074P13Rik protein OS=Mus musculus OX=10090 GN=1700074P13Rik PE=2 SV=1	1700074P13Rik	2	8	8	28.406	2.43147e+07	1.20917e+07	0.000209144	2.01086	24151000	23631000	25162000	10709000	11971000	13595000
Q9Z2U1	proteasome (prosome, macropain) subunit, alpha type 5	sp|Q9Z2U1|PSA5_MOUSE Proteasome subunit alpha type-5 OS=Mus musculus OX=10090 GN=Psma5 PE=1 SV=1	Psma5	2	7	7	26.411	21159000	10526700	0.00256968	2.01003	21102000	18724000	23651000	9288100	10586000	11706000
Q05186	reticulocalbin 1	sp|Q05186|RCN1_MOUSE Reticulocalbin-1 OS=Mus musculus OX=10090 GN=Rcn1 PE=1 SV=1	Rcn1	1	5	5	38.113	2.05253e+06	1.02237e+06	9.53e-05	2.00763	2046100	1994700	2116800	947830	989370	1129900
A2A6C4;A2A6C4-2	signal peptide peptidase 2C	\\sp|A2A6C4|SPP2C_MOUSE Signal peptide peptidase-like 2C OS=Mus musculus OX=10090 GN=Sppl2c PE=2 SV=1;sp|A2A6C4-2|SPP2C_MOUSE Isoform of A2A6C4, Isoform 2 of Signal peptide peptidase-like 2C OS=Mus musculus OX=10090 GN=Sppl2c\\"\"\"\"\""	Sppl2c	2	16	15	76.265	1.47607e+07	7.36077e+06	0.0011435	2.00532	14382000	13708000	16192000	6389700	7706600	7986000
Q62433	N-myc downstream regulated gene 1	sp|Q62433|NDRG1_MOUSE Protein NDRG1 OS=Mus musculus OX=10090 GN=Ndrg1 PE=1 SV=1	Ndrg1	1	1	1	43.008	101064	50442.7	0.00123032	2.0035	96802	103760	102630	38865	55180	57283
A2A6P4	family with sequence similarity 104, member A	\\tr|A2A6P4|A2A6P4_MOUSE Family with sequence similarity 104, member A OS=Mus musculus OX=10090 GN=Fam104a PE=1 SV=1\\"\"\"\"\""	Fam104a	1	5	5	19.618	2.06603e+06	1.03212e+06	0.00068994	2.00174	2067500	1964300	2166300	857350	1069000	1170000
F6UK66;Q810U5-3;Q810U5;Q810U5-2	coiled-coil domain containing 50	\\tr|F6UK66|F6UK66_MOUSE Isoform of Q810U5, Coiled-coil domain-containing protein 50 (Fragment) OS=Mus musculus OX=10090 GN=Ccdc50 PE=1 SV=1;sp|Q810U5-3|CCD50_MOUSE Isoform of Q810U5, Isoform 3 of Coiled-coil domain-containing protein 50 OS=Mus musculus OX=1\\"\"\"\"\""	Ccdc50	4	5	5	29.684	1677500	839220	0.00529284	1.99888	1712100	1438400	1882000	680240	938340	899080
G3XA14;Q3UXL1	aldo-keto reductase family 1, member C-like	\\tr|G3XA14|G3XA14_MOUSE Isoform of Q3UXL1, Aldo-keto reductase family 1, member C-like OS=Mus musculus OX=10090 GN=Akr1cl PE=1 SV=1;tr|Q3UXL1|Q3UXL1_MOUSE Aldo-keto reductase family 1, member C-like OS=Mus musculus OX=10090 GN=Akr1cl PE=1 SV=1\\"\"\"\"\""	Akr1cl	2	3	1	33.459	417493	208893	0.00184571	1.99859	429310	366370	456800	196270	202460	227950
B1AW18	RIKEN cDNA 4930402K13 gene	tr|B1AW18|B1AW18_MOUSE MCG54973 OS=Mus musculus OX=10090 GN=4930402K13Rik PE=4 SV=1	4930402K13Rik	1	2	2	48.285	1.24353e+06	622293	0.000983959	1.9983	1255900	1166500	1308200	507520	657960	701400
Q9DAL0	small integral membrane protein 23	sp|Q9DAL0|SIM23_MOUSE Small integral membrane protein 23 OS=Mus musculus OX=10090 GN=Smim23 PE=2 SV=1	Smim23	2	6	6	15.821	6.67257e+06	3352500	0.000200233	1.99033	6647000	6313800	7056900	3110700	3362100	3584700
Q9DBL9;Q9DBL9-2	abhydrolase domain containing 5	\\sp|Q9DBL9|ABHD5_MOUSE 1-acylglycerol-3-phosphate O-acyltransferase ABHD5 OS=Mus musculus OX=10090 GN=Abhd5 PE=1 SV=1;sp|Q9DBL9-2|ABHD5_MOUSE Isoform of Q9DBL9, Isoform 2 of 1-acylglycerol-3-phosphate O-acyltransferase ABHD5 OS=Mus musculus OX=10090 GN=Abhd\\"\"\"\"\""	Abhd5	3	6	6	39.154	6337300	3185300	0.000685974	1.98955	6159500	6033600	6818800	2741900	3335300	3478700
Q2TVW9;Q810P8	membrane-spanning 4-domains, subfamily A, member 5	\\tr|Q2TVW9|Q2TVW9_MOUSE Isoform of Q810P8, MS4a5 protein OS=Mus musculus OX=10090 GN=Ms4a5 PE=2 SV=1;tr|Q810P8|Q810P8_MOUSE Membrane-spanning 4-domains, subfamily A, member 5 OS=Mus musculus OX=10090 GN=Ms4a5 PE=2 SV=1\\"\"\"\"\""	Ms4a5	2	2	2	16.911	1.60883e+06	808740	0.000101691	1.98931	1583000	1549800	1693700	754150	825850	846220
P47738;A0A0G2JEU1	aldehyde dehydrogenase 2, mitochondrial	\\sp|P47738|ALDH2_MOUSE Aldehyde dehydrogenase, mitochondrial OS=Mus musculus OX=10090 GN=Aldh2 PE=1 SV=1;tr|A0A0G2JEU1|A0A0G2JEU1_MOUSE Isoform of P47738, Aldehyde dehydrogenase, mitochondrial OS=Mus musculus OX=10090 GN=Aldh2 PE=1 SV=1\\"\"\"\"\""	Aldh2	5	23	20	56.537	5.93113e+07	2.98523e+07	0.000175587	1.98682	57237000	58756000	61941000	26803000	30110000	32644000
Q9D115	zinc finger protein 706	sp|Q9D115|ZN706_MOUSE Zinc finger protein 706 OS=Mus musculus OX=10090 GN=Znf706 PE=1 SV=1	Zfp706	1	2	2	8.4977	1.87813e+06	946523	0.00229304	1.98424	1871600	1671500	2091300	829510	1013400	996660
F7CB97	CAP-GLY domain containing linker protein 1	\\tr|F7CB97|F7CB97_MOUSE Isoform of Q922J3, CAP-Gly domain-containing linker protein 1 (Fragment) OS=Mus musculus OX=10090 GN=Clip1 PE=1 SV=1\\"\"\"\"\""	Clip1	1	80	58	135.88	70390000	3.54943e+07	0.000209083	1.98313	69168000	68066000	73936000	31592000	36528000	38363000
Q7TPW1;A0A0G2JEX1	nexilin	\\sp|Q7TPW1|NEXN_MOUSE Nexilin OS=Mus musculus OX=10090 GN=Nexn PE=1 SV=3;tr|A0A0G2JEX1|A0A0G2JEX1_MOUSE Isoform of Q7TPW1, Nexilin OS=Mus musculus OX=10090 GN=Nexn PE=1 SV=1\\"\"\"\"\""	Nexn	7	17	0	72.107	1.33093e+07	6.71917e+06	0.000960171	1.9808	13185000	12415000	14328000	5767000	6857500	7533000
Q61001	laminin, alpha 5	sp|Q61001|LAMA5_MOUSE Laminin subunit alpha-5 OS=Mus musculus OX=10090 GN=Lama5 PE=1 SV=4	Lama5	1	27	27	404.05	9293500	4691900	0.000164927	1.98075	9022000	9147600	9710900	4272600	4632300	5170800
Q99NB1	acyl-CoA synthetase short-chain family member 1	\\sp|Q99NB1|ACS2L_MOUSE Acetyl-coenzyme A synthetase 2-like, mitochondrial OS=Mus musculus OX=10090 GN=Acss1 PE=1 SV=1\\"\"\"\"\""	Acss1	1	13	13	74.622	7.26773e+06	3670900	0.000558431	1.97982	6936700	7123100	7743400	3206300	3687400	4119000
P97370	ATPase, Na+/K+ transporting, beta 3 polypeptide	sp|P97370|AT1B3_MOUSE Sodium/potassium-transporting ATPase subunit beta-3 OS=Mus musculus OX=10090 GN=Atp1b3 PE=1 SV=1	Atp1b3	1	10	10	31.775	12450000	6296400	0.000367599	1.97732	12220000	11917000	13213000	5567900	6425400	6895900
A3KMP2;D6RH59;A3KMP2-2	tetratricopeptide repeat domain 38	\\sp|A3KMP2|TTC38_MOUSE Tetratricopeptide repeat protein 38 OS=Mus musculus OX=10090 GN=Ttc38 PE=1 SV=2;tr|D6RH59|D6RH59_MOUSE Isoform of A3KMP2, Tetratricopeptide repeat protein 38 OS=Mus musculus OX=10090 GN=Ttc38 PE=1 SV=1;sp|A3KMP2-2|TTC38_MOUSE Isoform \\"\"\"\"\""	Ttc38	3	2	2	52.223	396483	201103	0.000159393	1.97153	395670	384570	409210	180890	199300	223120
Q3TTE0-2	a disintegrin and metallopeptidase domain 5	\\sp|Q3TTE0-2|ADAM5_MOUSE Isoform of Q3TTE0, Isoform 2 of Disintegrin and metalloproteinase domain-containing protein 5 OS=Mus musculus OX=10090 GN=Adam5\\"\"\"\"\""	Adam5	1	33	1	86.814	7.11157e+07	3.61113e+07	0.000657287	1.96934	69241000	67604000	76502000	31475000	37285000	39574000
A1L3C1;A0A0U1RNU0	family with sequence similarity 71, member E1	\\sp|A1L3C1|F71E1_MOUSE Protein FAM71E1 OS=Mus musculus OX=10090 GN=Fam71e1 PE=2 SV=2;tr|A0A0U1RNU0|A0A0U1RNU0_MOUSE Isoform of A1L3C1, Protein FAM71E1 OS=Mus musculus OX=10090 GN=Fam71e1 PE=4 SV=1\\"\"\"\"\""	Fam71e1	4	3	3	24.172	3.14367e+06	1.59717e+06	0.000212303	1.96828	3103500	3062700	3264800	1400000	1641300	1750200
Q8CFI2;A0A1W2P7U1	cell division cycle 34	\\sp|Q8CFI2|UB2R1_MOUSE Ubiquitin-conjugating enzyme E2 R1 OS=Mus musculus OX=10090 GN=Cdc34 PE=1 SV=1;tr|A0A1W2P7U1|A0A1W2P7U1_MOUSE Isoform of Q8CFI2, Ubiquitin-conjugating enzyme E2 R1 OS=Mus musculus OX=10090 GN=Cdc34 PE=1 SV=1\\"\"\"\"\""	Cdc34	9	12	11	26.621	12936000	6.57533e+06	0.000416452	1.96735	12846000	12206000	13756000	5865300	6695400	7165300
Q3UMW8	ceroid-lipofuscinosis, neuronal 5	sp|Q3UMW8|CLN5_MOUSE Ceroid-lipofuscinosis neuronal protein 5 homolog OS=Mus musculus OX=10090 GN=Cln5 PE=1 SV=1	Cln5	1	2	2	39.329	96797.7	49231.7	0.000419574	1.96613	91049	99498	99846	42848	50690	54157
Q9CQC9	secretion associated Ras related GTPase 1B	sp|Q9CQC9|SAR1B_MOUSE GTP-binding protein SAR1b OS=Mus musculus OX=10090 GN=Sar1b PE=1 SV=1	Sar1b	4	7	2	22.382	2.87307e+06	1.46497e+06	0.00158831	1.96118	2895100	2604200	3119900	1257100	1513700	1624100
P56387	dynein light chain Tctex-type 3	sp|P56387|DYLT3_MOUSE Dynein light chain Tctex-type 3 OS=Mus musculus OX=10090 GN=Dynlt3 PE=1 SV=1	Dynlt3	1	1	1	12.957	591333	301720	0.00115412	1.95987	604500	530740	638760	276330	303110	325720
Q9QYI7	DnaJ heat shock protein family (Hsp40) member B8	sp|Q9QYI7|DNJB8_MOUSE DnaJ homolog subfamily B member 8 OS=Mus musculus OX=10090 GN=Dnajb8 PE=2 SV=1	Dnajb8	1	8	3	25.23	2515300	1.28443e+06	0.000104706	1.95829	2478400	2430600	2636900	1185100	1320200	1348000
A0A087WSD2	membrane-spanning 4-domains, subfamily A, member 14	\\tr|A0A087WSD2|A0A087WSD2_MOUSE Membrane-spanning 4-domains, subfamily A, member 14 OS=Mus musculus OX=10090 GN=Ms4a14 PE=4 SV=1\\"\"\"\"\""	Ms4a14	1	16	16	137.56	1.50523e+07	7.69083e+06	0.000508239	1.95718	14492000	14675000	15990000	6800900	7605000	8666600
Q8CFX1;A2A7A7	hexose-6-phosphate dehydrogenase (glucose 1-dehydrogenase)	\\sp|Q8CFX1|G6PE_MOUSE GDH/6PGL endoplasmic bifunctional protein OS=Mus musculus OX=10090 GN=H6pd PE=1 SV=2;tr|A2A7A7|A2A7A7_MOUSE Isoform of Q8CFX1, GDH/6PGL endoplasmic bifunctional protein OS=Mus musculus OX=10090 GN=H6pd PE=1 SV=1\\"\"\"\"\""	H6pd	3	8	8	88.927	2.37653e+06	1.21843e+06	0.00011503	1.95048	2316000	2375300	2438300	1099900	1217700	1337700
O35660;G5E8M7;D3YVP9;D3YVP8	glutathione S-transferase, mu 6	\\sp|O35660|GSTM6_MOUSE Glutathione S-transferase Mu 6 OS=Mus musculus OX=10090 GN=Gstm6 PE=1 SV=4;tr|G5E8M7|G5E8M7_MOUSE Isoform of O35660, Glutathione S-transferase Mu 6 OS=Mus musculus OX=10090 GN=Gstm6 PE=1 SV=1;tr|D3YVP9|D3YVP9_MOUSE Isoform of O35660, \\"\"\"\"\""	Gstm6	5	10	6	25.621	1.17707e+06	603727	0.000124218	1.94966	1183600	1188000	1159600	552360	581000	677820
Q9JMC3	DnaJ heat shock protein family (Hsp40) member A4	sp|Q9JMC3|DNJA4_MOUSE DnaJ homolog subfamily A member 4 OS=Mus musculus OX=10090 GN=Dnaja4 PE=1 SV=1	Dnaja4	2	24	24	44.901	30061000	1.54283e+07	0.000427176	1.94843	29331000	28902000	31950000	13585000	15797000	16903000
Q8K2Q2;D3Z1Q9	glutathione S-transferase omega 2	\\sp|Q8K2Q2|GSTO2_MOUSE Glutathione S-transferase omega-2 OS=Mus musculus OX=10090 GN=Gsto2 PE=1 SV=1;tr|D3Z1Q9|D3Z1Q9_MOUSE Isoform of Q8K2Q2, Glutathione S-transferase omega-2 (Fragment) OS=Mus musculus OX=10090 GN=Gsto2 PE=1 SV=1\\"\"\"\"\""	Gsto2	2	12	10	28.599	4.11047e+07	2.11053e+07	0.000521799	1.9476	40029000	38956000	44329000	19462000	20728000	23126000
Q91YN9	BCL2-associated athanogene 2	sp|Q91YN9|BAG2_MOUSE BAG family molecular chaperone regulator 2 OS=Mus musculus OX=10090 GN=Bag2 PE=1 SV=1	Bag2	1	8	8	23.473	3.23367e+06	1.66057e+06	0.00206573	1.94733	3196000	2966500	3538500	1382800	1721600	1877300
Q91WA3;D3Z2G7;F6UL83	histone deacetylase 11	\\sp|Q91WA3|HDA11_MOUSE Histone deacetylase 11 OS=Mus musculus OX=10090 GN=Hdac11 PE=1 SV=1;tr|D3Z2G7|D3Z2G7_MOUSE Isoform of Q91WA3, Histone deacetylase 11 (Fragment) OS=Mus musculus OX=10090 GN=Hdac11 PE=1 SV=1;tr|F6UL83|F6UL83_MOUSE Isoform of Q91WA3, His\\"\"\"\"\""	Hdac11	3	12	12	39.157	3604200	1.85213e+06	0.000110661	1.94597	3571800	3558200	3682600	1681500	1820700	2054200
Q8BH61	coagulation factor XIII, A1 subunit	sp|Q8BH61|F13A_MOUSE Coagulation factor XIII A chain OS=Mus musculus OX=10090 GN=F13a1 PE=1 SV=3	F13a1	1	13	12	83.206	2.25573e+06	1.15983e+06	0.000970064	1.94488	2101700	2474600	2190900	1063400	1153800	1262300
Q3UW53;E9PYV4;D3Z233	family with sequence similarity 129, member A	\\sp|Q3UW53|NIBAN_MOUSE Protein Niban OS=Mus musculus OX=10090 GN=Fam129a PE=1 SV=2;tr|E9PYV4|E9PYV4_MOUSE Isoform of Q3UW53, Protein Niban OS=Mus musculus OX=10090 GN=Fam129a PE=1 SV=1;tr|D3Z233|D3Z233_MOUSE Isoform of Q3UW53, Protein Niban OS=Mus musculus \\"\"\"\"\""	Fam129a	4	13	13	102.65	3.51697e+06	1.81063e+06	0.000283745	1.94239	3549200	3330400	3671300	1616600	1849300	1966000
P62748;P84075;A0A1Y7VMK3;E9PV73	hippocalcin-like 1	sp|P62748|HPCL1_MOUSE Hippocalcin-like protein 1 OS=Mus musculus OX=10090 GN=Hpcal1 PE=1 SV=2;sp|P84075|HPCA_MOUSE Neuron-specific calcium-binding protein hippocalcin OS=Mus musculus OX=10090 GN=Hpca PE=1 SV=2;tr|A0A1Y7VMK3|A0A1Y7VMK3_MOUSE Isoform of P627	Hpcal1	9	9	9	22.338	2.94833e+06	1.51843e+06	6.36e-05	1.94169	2947900	2905600	2991500	1386600	1511500	1657200
Q8BIL5;Q8BIL5-2	hook microtubule tethering protein 1	\\sp|Q8BIL5|HOOK1_MOUSE Protein Hook homolog 1 OS=Mus musculus OX=10090 GN=Hook1 PE=1 SV=2;sp|Q8BIL5-2|HOOK1_MOUSE Isoform of Q8BIL5, Isoform 2 of Protein Hook homolog 1 OS=Mus musculus OX=10090 GN=Hook1\\"\"\"\"\""	Hook1	3	42	41	84.438	4.48253e+07	2.31173e+07	9.22e-05	1.93904	43423000	44609000	46444000	21731000	22448000	25173000
D3YVA6;G5E8I1;Q9DAK8	leucine rich repeat containing 51	\\tr|D3YVA6|D3YVA6_MOUSE Isoform of Q9DAK8, Leucine-rich repeat-containing protein 51 OS=Mus musculus OX=10090 GN=Lrrc51 PE=4 SV=1;tr|G5E8I1|G5E8I1_MOUSE Isoform of Q9DAK8, Leucine-rich repeat-containing protein 51 OS=Mus musculus OX=10090 GN=Lrrc51 PE=4 SV=\\"\"\"\"\""	Lrrc51	5	5	5	18.313	1.66897e+06	861223	0.000289268	1.9379	1668300	1594100	1744500	763720	876410	943540
Q65CL1	catenin (cadherin associated protein), alpha 3	sp|Q65CL1|CTNA3_MOUSE Catenin alpha-3 OS=Mus musculus OX=10090 GN=Ctnna3 PE=1 SV=2	Ctnna3	1	23	22	99.802	2.43643e+07	1.25913e+07	0.00266371	1.93501	24281000	21883000	26929000	10589000	13796000	13389000
Q3UZD7;B7XG46;B7ZWJ6	family with sequence similarity 71, member F1	\\sp|Q3UZD7|F71F1_MOUSE Protein FAM71F1 OS=Mus musculus OX=10090 GN=Fam71f1 PE=2 SV=1;tr|B7XG46|B7XG46_MOUSE Isoform of Q3UZD7, Fam71f1 protein OS=Mus musculus OX=10090 GN=Fam71f1 PE=2 SV=1;tr|B7ZWJ6|B7ZWJ6_MOUSE Isoform of Q3UZD7, Fam71f1 protein OS=Mus mus\\"\"\"\"\""	Fam71f1	5	6	5	38.686	2.52153e+06	1303300	0.000979999	1.93473	2587700	2296200	2680700	1153900	1328600	1427400
Z4YJS5;A2ASQ1-3;Z4YK85;A2ASQ1-2;A2ASQ1;M0QWP1	agrin	\\tr|Z4YJS5|Z4YJS5_MOUSE Isoform of A2ASQ1, Agrin OS=Mus musculus OX=10090 GN=Agrn PE=1 SV=1;sp|A2ASQ1-3|AGRIN_MOUSE Isoform of A2ASQ1, Isoform 3 of Agrin OS=Mus musculus OX=10090 GN=Agrn;tr|Z4YK85|Z4YK85_MOUSE Isoform of A2ASQ1, Agrin OS=Mus musculus OX=100\\"\"\"\"\""	Agrn	6	2	2	121.88	326640	168953	0.00385058	1.9333	289940	332260	357720	138290	170670	197900
P29268	connective tissue growth factor;cellular communication network factor 2	sp|P29268|CTGF_MOUSE Connective tissue growth factor OS=Mus musculus OX=10090 GN=Ctgf PE=2 SV=3	Ctgf;Ccn2	1	2	2	37.824	459867	237980	0.00172991	1.93237	429120	458550	491930	190800	260740	262400
Q7M6Z4;Q7M6Z4-2	kinesin family member 27	\\sp|Q7M6Z4|KIF27_MOUSE Kinesin-like protein KIF27 OS=Mus musculus OX=10090 GN=Kif27 PE=1 SV=1;sp|Q7M6Z4-2|KIF27_MOUSE Isoform of Q7M6Z4, Isoform 2 of Kinesin-like protein KIF27 OS=Mus musculus OX=10090 GN=Kif27\\"\"\"\"\""	Kif27	13	74	71	158.95	1.13073e+08	58589000	0.000373195	1.92994	111630000	107370000	120220000	52788000	59478000	63501000
O35074;Q8BXC0	prostaglandin I2 (prostacyclin) synthase	\\sp|O35074|PTGIS_MOUSE Prostacyclin synthase OS=Mus musculus OX=10090 GN=Ptgis PE=1 SV=1;tr|Q8BXC0|Q8BXC0_MOUSE Isoform of O35074, Prostacyclin synthase OS=Mus musculus OX=10090 GN=Ptgis PE=1 SV=1\\"\"\"\"\""	Ptgis	2	9	9	57.046	4.15707e+06	2.15417e+06	0.00127953	1.92978	4107200	3878100	4485900	1812300	2271900	2378300
Q497K7	transmembrane protein 247	sp|Q497K7|TM247_MOUSE Transmembrane protein 247 OS=Mus musculus OX=10090 GN=Tmem247 PE=1 SV=2	Tmem247	2	10	10	23.97	2.42617e+07	12573000	0.000490493	1.92966	23348000	23452000	25985000	11194000	12857000	13668000
P21300	aldo-keto reductase family 1, member B7	sp|P21300|ALD1_MOUSE Aldose reductase-related protein 1 OS=Mus musculus OX=10090 GN=Akr1b7 PE=1 SV=4	Akr1b7	1	4	1	35.988	163993	85045.3	0.00274221	1.92828	170240	148660	173080	66924	91741	96471
Q7TMR0;A0A140LHY2	prolylcarboxypeptidase (angiotensinase C)	\\sp|Q7TMR0|PCP_MOUSE Lysosomal Pro-X carboxypeptidase OS=Mus musculus OX=10090 GN=Prcp PE=1 SV=2;tr|A0A140LHY2|A0A140LHY2_MOUSE Isoform of Q7TMR0, Lysosomal Pro-X carboxypeptidase OS=Mus musculus OX=10090 GN=Prcp PE=1 SV=1\\"\"\"\"\""	Prcp	3	16	16	55.026	12818000	6.64827e+06	0.000466966	1.92802	12816000	12151000	13487000	5789100	6882800	7272900
D3YY50;F8WHX2;Q9D8X1	cutC copper transporter	\\tr|D3YY50|D3YY50_MOUSE Isoform of Q9D8X1, Copper homeostasis protein cutC homolog (Fragment) OS=Mus musculus OX=10090 GN=Cutc PE=1 SV=1;tr|F8WHX2|F8WHX2_MOUSE Isoform of Q9D8X1, Copper homeostasis protein cutC homolog OS=Mus musculus OX=10090 GN=Cutc PE=1 \\"\"\"\"\""	Cutc	3	7	7	27.153	6.00173e+06	3.11383e+06	0.00298887	1.92744	6069500	5290700	6645000	2682200	3293300	3366000
Q9CQR4	acyl-CoA thioesterase 13	sp|Q9CQR4|ACO13_MOUSE Acyl-coenzyme A thioesterase 13 OS=Mus musculus OX=10090 GN=Acot13 PE=1 SV=1	Acot13	1	3	3	15.183	3.57977e+06	1857500	0.000977137	1.9272	3557700	3843400	3338200	1693800	1754100	2124600
Q9WV27	ATPase, Na+/K+ transporting, alpha 4 polypeptide	sp|Q9WV27|AT1A4_MOUSE Sodium/potassium-transporting ATPase subunit alpha-4 OS=Mus musculus OX=10090 GN=Atp1a4 PE=1 SV=3	Atp1a4	1	41	31	114.89	7.52223e+07	3.91597e+07	0.000369834	1.92091	74992000	71512000	79163000	34637000	40222000	42620000
Q9D2T6	RIKEN cDNA 1700034E13 gene	tr|Q9D2T6|Q9D2T6_MOUSE RIKEN cDNA 1700034E13 gene OS=Mus musculus OX=10090 GN=1700034E13Rik PE=2 SV=1	1700034E13Rik	1	3	3	12.416	1.36927e+06	713223	0.000145891	1.91983	1301000	1393100	1413700	677310	687540	774820
O54863	testis-specific serine kinase 2	sp|O54863|TSSK2_MOUSE Testis-specific serine/threonine-protein kinase 2 OS=Mus musculus OX=10090 GN=Tssk2 PE=1 SV=2	Tssk2	1	21	16	41.022	25117000	1.30897e+07	0.00248239	1.91884	25197000	22527000	27627000	11148000	13699000	14422000
B1AR42;B1AR44;Q6NSU2;B1AR39	RIKEN cDNA 2810408A11 gene	\\tr|B1AR42|B1AR42_MOUSE Isoform of Q6NSU2, RIKEN cDNA 2810408A11 gene OS=Mus musculus OX=10090 GN=2810408A11Rik PE=1 SV=1;tr|B1AR44|B1AR44_MOUSE Isoform of Q6NSU2, RIKEN cDNA 2810408A11 gene OS=Mus musculus OX=10090 GN=2810408A11Rik PE=1 SV=1;tr|Q6NSU2|Q6NS\\"\"\"\"\""	2810408A11Rik	6	10	10	44.159	5.83977e+06	3.04363e+06	0.000171491	1.91868	5760200	5727400	6031700	2764300	2980200	3386400
Q0VF76	tetratricopeptide repeat domain 39D	tr|Q0VF76|Q0VF76_MOUSE Tetratricopeptide repeat domain 39D OS=Mus musculus OX=10090 GN=Ttc39d PE=2 SV=1	Ttc39d	1	11	11	69.975	5950600	3.10563e+06	0.00053685	1.91607	5828000	5627400	6396400	2815700	3128200	3373000
Q80YT5	spermatogenesis associated 20	sp|Q80YT5|SPT20_MOUSE Spermatogenesis-associated protein 20 OS=Mus musculus OX=10090 GN=Spata20 PE=1 SV=1	Spata20	1	32	32	88.471	6.58267e+07	3.43627e+07	0.000113583	1.91564	64747000	64304000	68429000	31391000	34682000	37015000
Q4VAA2;A0A087WNP6;Q4VAA2-2	carnitine deficiency-associated gene expressed in ventricle 3	\\sp|Q4VAA2|CDV3_MOUSE Protein CDV3 OS=Mus musculus OX=10090 GN=Cdv3 PE=1 SV=2;tr|A0A087WNP6|A0A087WNP6_MOUSE Isoform of Q4VAA2, Protein CDV3 OS=Mus musculus OX=10090 GN=Cdv3 PE=1 SV=1;sp|Q4VAA2-2|CDV3_MOUSE Isoform of Q4VAA2, Isoform 2 of Protein CDV3 OS=Mu\\"\"\"\"\""	Cdv3	6	12	12	29.729	10398700	5.43513e+06	0.000995715	1.91324	10358000	9724100	11114000	4722000	5432400	6151000
Q9R1P3	proteasome (prosome, macropain) subunit, beta type 2	sp|Q9R1P3|PSB2_MOUSE Proteasome subunit beta type-2 OS=Mus musculus OX=10090 GN=Psmb2 PE=1 SV=1	Psmb2	1	12	12	22.906	11507000	6017800	0.00106796	1.91216	11447000	10669000	12405000	5236200	6190400	6626800
Q922Q1	mitochondrial amidoxime reducing component 2	sp|Q922Q1|MARC2_MOUSE Mitochondrial amidoxime reducing component 2 OS=Mus musculus OX=10090 GN=Marc2 PE=1 SV=1	2019-03-02	5	11	11	38.194	1.15387e+07	6.03657e+06	0.000610984	1.91146	11491000	10698000	12427000	5524500	6242000	6343200
Q811W2;A0A0N4SUV4;A0A0N4SV88	cytochrome P450, family 26, subfamily b, polypeptide 1	\\sp|Q811W2|CP26B_MOUSE Cytochrome P450 26B1 OS=Mus musculus OX=10090 GN=Cyp26b1 PE=1 SV=1;tr|A0A0N4SUV4|A0A0N4SUV4_MOUSE Isoform of Q811W2, Cytochrome P450 26B1 OS=Mus musculus OX=10090 GN=Cyp26b1 PE=1 SV=1;tr|A0A0N4SV88|A0A0N4SV88_MOUSE Isoform of Q811W2, \\"\"\"\"\""	Cyp26b1	4	3	3	57.375	319143	167027	0.000636156	1.91072	301830	309080	346520	152970	169970	178140
Q9D4U4	H2A histone family member L3	tr|Q9D4U4|Q9D4U4_MOUSE H2A histone family member L3 OS=Mus musculus OX=10090 GN=H2al3 PE=2 SV=1	H2al3	1	5	5	14.337	4.42273e+06	2.31637e+06	0.000406605	1.90934	4357600	4232400	4678200	2052100	2362400	2534600
Q8BV49	interferon activated gene 209	sp|Q8BV49|IFIX_MOUSE Pyrin and HIN domain-containing protein 1 OS=Mus musculus OX=10090 GN=Pyhin1 PE=1 SV=1	Ifi209	4	3	3	46.886	231117	121067	3.61e-05	1.90899	236060	231740	225550	112390	127760	123050
Q9D8B6	family with sequence similarity 210, member B	\\sp|Q9D8B6|F210B_MOUSE Protein FAM210B, mitochondrial OS=Mus musculus OX=10090 GN=Fam210b PE=1 SV=3\\"\"\"\"\""	Fam210b	1	1	1	20.344	229117	120027	0.00278324	1.90887	222420	222920	242010	93470	146510	120100
Q60759;A0A0A0MQ68	glutaryl-Coenzyme A dehydrogenase	\\sp|Q60759|GCDH_MOUSE Glutaryl-CoA dehydrogenase, mitochondrial OS=Mus musculus OX=10090 GN=Gcdh PE=1 SV=2;tr|A0A0A0MQ68|A0A0A0MQ68_MOUSE Isoform of Q60759, Glutaryl-CoA dehydrogenase, mitochondrial OS=Mus musculus OX=10090 GN=Gcdh PE=1 SV=1\\"\"\"\"\""	Gcdh	2	2	2	48.605	467820	245837	3.26e-05	1.90296	452740	480290	470430	234510	244000	259000
Q9DD03	RAB13, member RAS oncogene family	sp|Q9DD03|RAB13_MOUSE Ras-related protein Rab-13 OS=Mus musculus OX=10090 GN=Rab13 PE=1 SV=1	Rab13	2	4	1	22.77	145380	76440.3	3.36e-05	1.90185	150890	141400	143850	73847	79908	75566
D3Z652;D3Z4U7;A0A0R4J070;A0A0R4J1P6;Q14BK3;Q14BK3-2;A0A087WNR4	testis expressed 35	\\tr|D3Z652|D3Z652_MOUSE Isoform of Q14BK3, Testis-expressed protein 35 OS=Mus musculus OX=10090 GN=Tex35 PE=4 SV=1;tr|D3Z4U7|D3Z4U7_MOUSE Isoform of Q14BK3, Testis-expressed protein 35 OS=Mus musculus OX=10090 GN=Tex35 PE=4 SV=1;tr|A0A0R4J070|A0A0R4J070_MOU\\"\"\"\"\""	Tex35	7	8	8	21.633	8.65737e+06	4552900	0.00101375	1.90151	8461900	8195200	9315000	3896800	4734000	5027900
Q9D964	glycine amidinotransferase (L-arginine:glycine amidinotransferase)	\\sp|Q9D964|GATM_MOUSE Glycine amidinotransferase, mitochondrial OS=Mus musculus OX=10090 GN=Gatm PE=1 SV=1\\"\"\"\"\""	Gatm	1	17	17	48.297	9.84573e+06	5.18067e+06	0.000126897	1.90048	9799600	9517600	10220000	4734200	5229300	5578500
Q61554	fibrillin 1	sp|Q61554|FBN1_MOUSE Fibrillin-1 OS=Mus musculus OX=10090 GN=Fbn1 PE=1 SV=2	Fbn1	2	6	6	312.3	794180	417917	0.000839249	1.90033	863920	740800	777820	429080	378500	446170
P47857-2;P47857-3;P47857	phosphofructokinase, muscle	\\sp|P47857-2|PFKAM_MOUSE Isoform of P47857, Isoform 2 of ATP-dependent 6-phosphofructokinase, muscle type OS=Mus musculus OX=10090 GN=Pfkm;sp|P47857-3|PFKAM_MOUSE Isoform of P47857, Isoform 3 of ATP-dependent 6-phosphofructokinase, muscle type OS=Mus muscul\\"\"\"\"\""	Pfkm	5	22	18	93.246	1.96983e+07	1.03733e+07	0.00074848	1.89895	19094000	18902000	21099000	9241800	10174000	11704000
Q2VLH6;Q2VLH6-2	CD163 antigen	\\sp|Q2VLH6|C163A_MOUSE Scavenger receptor cysteine-rich type 1 protein M130 OS=Mus musculus OX=10090 GN=Cd163 PE=1 SV=2;sp|Q2VLH6-2|C163A_MOUSE Isoform of Q2VLH6, Isoform 2 of Scavenger receptor cysteine-rich type 1 protein M130 OS=Mus musculus OX=10090 GN=\\"\"\"\"\""	Cd163	2	7	7	120.92	939023	495267	0.000360668	1.89599	936410	898310	982350	486370	446130	553300
P51881	solute carrier family 25 (mitochondrial carrier, adenine nucleotide translocator), member 5	sp|P51881|ADT2_MOUSE ADP/ATP translocase 2 OS=Mus musculus OX=10090 GN=Slc25a5 PE=1 SV=3	Slc25a5	1	20	8	32.931	2.65523e+07	1.40307e+07	0.000534316	1.89245	25503000	25859000	28295000	12401000	14315000	15376000
Q6P8Q0;P13745;P10648;D3Z6A6;D3YZV3;E9Q6L7	predicted gene 3776	tr|Q6P8Q0|Q6P8Q0_MOUSE Glutathione S-transferase OS=Mus musculus OX=10090 GN=Gm3776 PE=2 SV=1;sp|P13745|GSTA1_MOUSE Glutathione S-transferase A1 OS=Mus musculus OX=10090 GN=Gsta1 PE=1 SV=2;sp|P10648|GSTA2_MOUSE Glutathione S-transferase A2 OS=Mus musculus	Gm3776	6	6	3	25.582	1734800	917627	4.79e-05	1.89053	1726500	1676200	1801700	886200	902000	964680
Q8CIF4;A0A0R4J131	biotinidase	\\sp|Q8CIF4|BTD_MOUSE Biotinidase OS=Mus musculus OX=10090 GN=Btd PE=1 SV=2;tr|A0A0R4J131|A0A0R4J131_MOUSE Isoform of Q8CIF4, Biotinidase OS=Mus musculus OX=10090 GN=Btd PE=1 SV=1\\"\"\"\"\""	Btd	2	2	2	58.154	216457	114574	0.00112699	1.88922	218250	219240	211880	94201	113810	135710
Q8K124	pleckstrin homology domain containing, family O member 2	sp|Q8K124|PKHO2_MOUSE Pleckstrin homology domain-containing family O member 2 OS=Mus musculus OX=10090 GN=Plekho2 PE=1 SV=1	Plekho2	1	5	5	53.872	2.21753e+06	1174400	0.000225734	1.88823	2197500	2153100	2302000	1074300	1140300	1308600
G3UWF2	IQ motif containing F6	tr|G3UWF2|G3UWF2_MOUSE IQ motif-containing F6 OS=Mus musculus OX=10090 GN=Iqcf6 PE=4 SV=1	Iqcf6	1	5	4	18.618	2.33157e+06	1.23643e+06	0.000168592	1.88572	2255400	2289300	2450000	1168800	1198300	1342200
E9PVW4;D3YX43	V-set and immunoglobulin domain containing 10	\\tr|E9PVW4|E9PVW4_MOUSE Isoform of D3YX43, V-set and immunoglobulin domain-containing protein 10 OS=Mus musculus OX=10090 GN=Vsig10 PE=1 SV=1;sp|D3YX43|VSI10_MOUSE V-set and immunoglobulin domain-containing protein 10 OS=Mus musculus OX=10090 GN=Vsig10 PE=3\\"\"\"\"\""	Vsig10	2	5	5	57.647	540947	287073	0.00052063	1.88434	524490	516980	581370	260080	292050	309090
A0A087WQ95;A0A087WRK0;A0A087WP42;E9QNY9;A0A087WRE8;E9QKH0;A0A087WQ31;A0A0A6YXZ1;Q80TV8-2;Q80TV8	CLIP associating protein 1	\\tr|A0A087WQ95|A0A087WQ95_MOUSE Isoform of Q80TV8, CLIP-associating protein 1 OS=Mus musculus OX=10090 GN=Clasp1 PE=1 SV=2;tr|A0A087WRK0|A0A087WRK0_MOUSE Isoform of Q80TV8, CLIP-associating protein 1 OS=Mus musculus OX=10090 GN=Clasp1 PE=1 SV=2;tr|A0A087WP4\\"\"\"\"\""	Clasp1	11	46	2	161.95	2.22427e+07	11817000	0.00026651	1.88226	22090000	21420000	23218000	10501000	12162000	12788000
Q9JM62;Q9JM62-2	receptor accessory protein 6	\\sp|Q9JM62|REEP6_MOUSE Receptor expression-enhancing protein 6 OS=Mus musculus OX=10090 GN=Reep6 PE=1 SV=1;sp|Q9JM62-2|REEP6_MOUSE Isoform of Q9JM62, Isoform 2 of Receptor expression-enhancing protein 6 OS=Mus musculus OX=10090 GN=Reep6\\"\"\"\"\""	Reep6	3	3	3	22.204	1913200	1017120	4.37e-05	1.881	1886300	1876700	1976600	951960	1031400	1068000
B1AXJ3;Q924X6-2;B1AXJ4;Q924X6;B1AXJ6;B1AXJ5	low density lipoprotein receptor-related protein 8, apolipoprotein e receptor	\\tr|B1AXJ3|B1AXJ3_MOUSE Isoform of Q924X6, Low-density lipoprotein receptor-related protein 8 OS=Mus musculus OX=10090 GN=Lrp8 PE=1 SV=1;sp|Q924X6-2|LRP8_MOUSE Isoform of Q924X6, Isoform 2 of Low-density lipoprotein receptor-related protein 8 OS=Mus musculu\\"\"\"\"\""	Lrp8	7	5	5	96.318	199903	106289	0.00285988	1.88074	220720	186520	192470	92086	101830	124950
Q99KR8;D3YVV4	fucosidase, alpha-L- 2, plasma	\\sp|Q99KR8|FUCO2_MOUSE Plasma alpha-L-fucosidase OS=Mus musculus OX=10090 GN=Fuca2 PE=1 SV=1;tr|D3YVV4|D3YVV4_MOUSE Isoform of Q99KR8, Plasma alpha-L-fucosidase (Fragment) OS=Mus musculus OX=10090 GN=Fuca2 PE=1 SV=1\\"\"\"\"\""	Fuca2	2	2	2	53.645	895853	476407	0.000804102	1.88043	894870	831960	960730	443510	455480	530230
P60710;E9Q1F2;E9Q5F4;G3UZ07	actin, beta	\\sp|P60710|ACTB_MOUSE Actin, cytoplasmic 1 OS=Mus musculus OX=10090 GN=Actb PE=1 SV=1;tr|E9Q1F2|E9Q1F2_MOUSE Isoform of P60710, Actin, cytoplasmic 1 OS=Mus musculus OX=10090 GN=Actb PE=1 SV=1;tr|E9Q5F4|E9Q5F4_MOUSE Isoform of P60710, Actin, cytoplasmic 1 (F\\"\"\"\"\""	Actb	10	22	0	41.736	479460000	2.55167e+08	0.000703958	1.87901	461160000	470160000	507060000	218100000	265110000	282290000
P24549	aldehyde dehydrogenase family 1, subfamily A1;RIKEN cDNA E030003E18 gene	sp|P24549|AL1A1_MOUSE Retinal dehydrogenase 1 OS=Mus musculus OX=10090 GN=Aldh1a1 PE=1 SV=5	Aldh1a1;E030003E18Rik	4	16	14	54.467	1.16407e+07	6223500	0.0015569	1.87044	11805000	10505000	12612000	5577400	6311900	6781200
O70169	protease, serine 39	sp|O70169|PRS39_MOUSE Inactive serine protease 39 OS=Mus musculus OX=10090 GN=Prss39 PE=2 SV=1	Prss39	2	8	7	40.765	8856800	4.74397e+06	0.000476243	1.86696	8759700	8424500	9386200	4266400	4744900	5220600
Q9EPL9;Q3TAW3;E9Q296;Q8C178	acyl-Coenzyme A oxidase 3, pristanoyl	\\sp|Q9EPL9|ACOX3_MOUSE Peroxisomal acyl-coenzyme A oxidase 3 OS=Mus musculus OX=10090 GN=Acox3 PE=1 SV=2;tr|Q3TAW3|Q3TAW3_MOUSE Isoform of Q9EPL9, Acyl-coenzyme A oxidase OS=Mus musculus OX=10090 GN=Acox3 PE=1 SV=1;tr|E9Q296|E9Q296_MOUSE Isoform of Q9EPL9, \\"\"\"\"\""	Acox3	9	8	8	78.403	1571200	841597	0.00173675	1.86693	1579900	1415000	1718700	755940	897760	871090
Q8CH77-4;Q8CH77-3;Q8CH77-2;Q8CH77	neuron navigator 1	\\sp|Q8CH77-4|NAV1_MOUSE Isoform of Q8CH77, Isoform 4 of Neuron navigator 1 OS=Mus musculus OX=10090 GN=Nav1;sp|Q8CH77-3|NAV1_MOUSE Isoform of Q8CH77, Isoform 3 of Neuron navigator 1 OS=Mus musculus OX=10090 GN=Nav1;sp|Q8CH77-2|NAV1_MOUSE Isoform of Q8CH77, \\"\"\"\"\""	Nav1	4	1	1	87.804	207650	111393	0.00192948	1.8641	197260	193140	232550	110390	119640	104150
O54887;Q147V4	testis-specific serine kinase substrate	\\sp|O54887|TSKS_MOUSE Testis-specific serine kinase substrate OS=Mus musculus OX=10090 GN=Tsks PE=1 SV=4;tr|Q147V4|Q147V4_MOUSE Isoform of O54887, Serine/threonine kinase 22 substrate 1 OS=Mus musculus OX=10090 GN=Tsks PE=1 SV=1\\"\"\"\"\""	Tsks	3	47	39	63.504	1.54597e+08	82948000	0.000397109	1.86378	151640000	148690000	163460000	73798000	85312000	89734000
P49442	inositol polyphosphate-1-phosphatase	sp|P49442|INPP_MOUSE Inositol polyphosphate 1-phosphatase OS=Mus musculus OX=10090 GN=Inpp1 PE=1 SV=2	Inpp1	2	7	7	43.346	2281500	1224300	0.000523059	1.86351	2120900	2342200	2381400	1148900	1170800	1353200
Q922F4	tubulin, beta 6 class V	sp|Q922F4|TBB6_MOUSE Tubulin beta-6 chain OS=Mus musculus OX=10090 GN=Tubb6 PE=1 SV=1	Tubb6	1	13	2	50.09	150100	80647	0.000615416	1.86117	142460	160020	147820	71343	82900	87698
Q9D2H8;Q9D2H8-2	fibronectin type III domain containing 8	\\sp|Q9D2H8|FNDC8_MOUSE Fibronectin type III domain-containing protein 8 OS=Mus musculus OX=10090 GN=Fndc8 PE=2 SV=1;sp|Q9D2H8-2|FNDC8_MOUSE Isoform of Q9D2H8, Isoform 2 of Fibronectin type III domain-containing protein 8 OS=Mus musculus OX=10090 GN=Fndc8\\"\"\"\"\""	Fndc8	2	14	13	35.618	3.08577e+07	1.65997e+07	0.00179359	1.85893	30918000	28072000	33583000	15162000	15890000	18747000
Q5F289	sperm maturation 1	sp|Q5F289|SPEM1_MOUSE Spermatid maturation protein 1 OS=Mus musculus OX=10090 GN=Spem1 PE=1 SV=1	Spem1	1	6	6	35.062	4.73087e+06	2545200	0.000546557	1.85874	4599600	4522400	5070600	2305000	2565600	2765000
O88322;A0A286YCQ5	nidogen 2	\\sp|O88322|NID2_MOUSE Nidogen-2 OS=Mus musculus OX=10090 GN=Nid2 PE=1 SV=2;tr|A0A286YCQ5|A0A286YCQ5_MOUSE Isoform of O88322, Nidogen-2 (Fragment) OS=Mus musculus OX=10090 GN=Nid2 PE=1 SV=1\\"\"\"\"\""	Nid2	2	7	6	153.91	1.84973e+06	995657	0.0019337	1.8578	1859900	1690700	1998600	845270	1038700	1103000
Q9D9X8-2;Q9D9X8	sperm acrosome associated 3	\\sp|Q9D9X8-2|SACA3_MOUSE Isoform of Q9D9X8, Isoform 2 of Sperm acrosome membrane-associated protein 3 OS=Mus musculus OX=10090 GN=Spaca3;sp|Q9D9X8|SACA3_MOUSE Sperm acrosome membrane-associated protein 3 OS=Mus musculus OX=10090 GN=Spaca3 PE=1 SV=2\\"\"\"\"\""	Spaca3	2	4	4	18.438	5.65987e+06	3.04847e+06	0.000399645	1.85663	5428700	5598600	5952300	2745200	3023200	3377000
Q9QYC0-2;E9Q1K3;F8WHZ9;F8WGR0;Q9QYC0	adducin 1 (alpha)	\\sp|Q9QYC0-2|ADDA_MOUSE Isoform of Q9QYC0, Isoform 2 of Alpha-adducin OS=Mus musculus OX=10090 GN=Add1;tr|E9Q1K3|E9Q1K3_MOUSE Isoform of Q9QYC0, Alpha-adducin OS=Mus musculus OX=10090 GN=Add1 PE=1 SV=1;tr|F8WHZ9|F8WHZ9_MOUSE Isoform of Q9QYC0, Alpha-adducin\\"\"\"\"\""	Add1	11	10	10	69.886	2845900	1.53343e+06	0.000761051	1.8559	2713000	2837000	2987700	1303400	1605400	1691500
Q8C0W0;A2AF31	thymosin beta 15b2;thymosin beta 15b like	\\tr|Q8C0W0|Q8C0W0_MOUSE Thymosin beta 15b-like OS=Mus musculus OX=10090 GN=Tmsb15l PE=1 SV=1;tr|A2AF31|A2AF31_MOUSE Isoform of Q8C0W0, Thymosin beta 15b2 OS=Mus musculus OX=10090 GN=Tmsb15b2 PE=1 SV=1\\"\"\"\"\""	Tmsb15b2;Tmsb15l	2	2	2	9.2252	1069300	576443	0.000416925	1.85499	1010900	1073700	1123300	522920	572770	633640
P40338	von Hippel-Lindau tumor suppressor	sp|P40338|VHL_MOUSE von Hippel-Lindau disease tumor suppressor OS=Mus musculus OX=10090 GN=Vhl PE=1 SV=1	Vhl	1	2	2	20.769	361603	195140	0.000664229	1.85304	353140	354770	376900	171330	189580	224510
Q0ZNK3	predicted gene 6760	tr|Q0ZNK3|Q0ZNK3_MOUSE SPANX-N OS=Mus musculus OX=10090 GN=Gm6760 PE=4 SV=1	Gm6760	1	2	2	9.987	893497	482567	0.00124412	1.85155	880110	848450	951930	412940	482540	552220
Q14B71;D3YZE8	cell division cycle associated 2	\\sp|Q14B71|CDCA2_MOUSE Cell division cycle-associated protein 2 OS=Mus musculus OX=10090 GN=Cdca2 PE=1 SV=2;tr|D3YZE8|D3YZE8_MOUSE Isoform of Q14B71, Cell division cycle-associated protein 2 (Fragment) OS=Mus musculus OX=10090 GN=Cdca2 PE=1 SV=1\\"\"\"\"\""	Cdca2	5	17	17	106.36	4.54613e+06	2.45733e+06	0.0003534	1.85003	4504900	4347300	4786200	2216800	2476300	2678900
Q9D5U0	lysophosphatidylcholine acyltransferase 2B	sp|Q9D5U0|PCT2B_MOUSE Lysophosphatidylcholine acyltransferase 2B OS=Mus musculus OX=10090 GN=Lpcat2b PE=2 SV=1	Lpcat2b	1	11	10	58.38	6907300	3735900	0.00105758	1.8489	6477500	7421800	6822600	3344400	3656300	4207000
P14602-3;P14602-2;P14602;D3YZ06	heat shock protein 1	\\sp|P14602-3|HSPB1_MOUSE Isoform of P14602, Isoform C of Heat shock protein beta-1 OS=Mus musculus OX=10090 GN=Hspb1;sp|P14602-2|HSPB1_MOUSE Isoform of P14602, Isoform B of Heat shock protein beta-1 OS=Mus musculus OX=10090 GN=Hspb1;sp|P14602|HSPB1_MOUSE He\\"\"\"\"\""	Hspb1	4	5	5	19.38	1.60617e+06	869097	0.00106481	1.84809	1609800	1492700	1716000	784450	841650	981190
O08573-3;O08573-2;B1AQR8;G3X9T7;O08573	lectin, galactose binding, soluble 9	\\sp|O08573-3|LEG9_MOUSE Isoform of O08573, Isoform 3 of Galectin-9 OS=Mus musculus OX=10090 GN=Lgals9;sp|O08573-2|LEG9_MOUSE Isoform of O08573, Isoform 2 of Galectin-9 OS=Mus musculus OX=10090 GN=Lgals9;tr|B1AQR8|B1AQR8_MOUSE Isoform of O08573, Galectin OS=\\"\"\"\"\""	Lgals9	5	5	5	35.164	950520	514500	0.000835523	1.84746	883790	988150	979620	455180	512410	575910
P40630-2	transcription factor A, mitochondrial	\\sp|P40630-2|TFAM_MOUSE Isoform of P40630, Isoform Nuclear of Transcription factor A, mitochondrial OS=Mus musculus OX=10090 GN=Tfam\\"\"\"\"\""	Tfam	1	22	1	25.036	362710	196477	0.00172531	1.84606	370400	329440	388290	169770	203160	216500
D3YU06;D3Z6Y2;Q91ZH7-2;Q91ZH7;F6RSE8	abhydrolase domain containing 3	\\tr|D3YU06|D3YU06_MOUSE Isoform of Q91ZH7, Phospholipase ABHD3 OS=Mus musculus OX=10090 GN=Abhd3 PE=1 SV=1;tr|D3Z6Y2|D3Z6Y2_MOUSE Isoform of Q91ZH7, Phospholipase ABHD3 OS=Mus musculus OX=10090 GN=Abhd3 PE=1 SV=1;sp|Q91ZH7-2|ABHD3_MOUSE Isoform of Q91ZH7, I\\"\"\"\"\""	Abhd3	5	4	4	45.237	708307	383697	0.000381448	1.846	721980	679880	723060	334760	394500	421830
F6ZQA3	nuclear mitotic apparatus protein 1	\\tr|F6ZQA3|F6ZQA3_MOUSE Isoform of E9Q7G0, Nuclear mitotic apparatus protein 1 (Fragment) OS=Mus musculus OX=10090 GN=Numa1 PE=1 SV=1\\"\"\"\"\""	Numa1	1	30	1	82.882	507023	274933	0.00251634	1.84416	492040	466970	562060	248520	312600	263680
Q9D9D5;A0A0R4J1W9;Z4YLS6;Q9D9D5-2	transmembrane and coiled-coil domains 5	\\sp|Q9D9D5|TMC5A_MOUSE Transmembrane and coiled-coil domain-containing protein 5A OS=Mus musculus OX=10090 GN=Tmco5a PE=1 SV=1;tr|A0A0R4J1W9|A0A0R4J1W9_MOUSE Isoform of Q9D9D5, Transmembrane and coiled-coil domains 5 (Fragment) OS=Mus musculus OX=10090 GN=T\\"\"\"\"\""	Tmco5	4	17	17	35.853	2.38243e+07	1.29323e+07	0.00101214	1.84223	24024000	22114000	25335000	11217000	13815000	13765000
Q9DBF1-2;Q9DBF1;G3UYR8	aldehyde dehydrogenase family 7, member A1	\\sp|Q9DBF1-2|AL7A1_MOUSE Isoform of Q9DBF1, Isoform 2 of Alpha-aminoadipic semialdehyde dehydrogenase OS=Mus musculus OX=10090 GN=Aldh7a1;sp|Q9DBF1|AL7A1_MOUSE Alpha-aminoadipic semialdehyde dehydrogenase OS=Mus musculus OX=10090 GN=Aldh7a1 PE=1 SV=4;tr|G3U\\"\"\"\"\""	Aldh7a1	6	15	15	55.644	16404000	8911100	0.000712845	1.84085	16339000	15415000	17458000	7884400	9164300	9684600
A0A1D5RMD1	IQ motif containing N	tr|A0A1D5RMD1|A0A1D5RMD1_MOUSE IQ motif-containing N OS=Mus musculus OX=10090 GN=Iqcn PE=4 SV=1	Iqcn	3	65	65	154.66	122000000	66309000	0.000690525	1.83987	118800000	117370000	129830000	58469000	66925000	73533000
A6ZI46;Q9CPQ9	aldolase 1 A, retrogene 1	\\tr|A6ZI46|A6ZI46_MOUSE Fructose-bisphosphate aldolase OS=Mus musculus OX=10090 GN=Aldoart1 PE=1 SV=1;tr|Q9CPQ9|Q9CPQ9_MOUSE Isoform of A6ZI46, Fructose-bisphosphate aldolase OS=Mus musculus OX=10090 GN=Aldoart1 PE=1 SV=1\\"\"\"\"\""	Aldoart1	2	23	5	45.343	3.26943e+06	1.77777e+06	0.000253334	1.83907	3243500	3145100	3419700	1610300	1798700	1924300
Q9CWH6	proteasome (prosome, macropain) subunit, alpha type, 8	sp|Q9CWH6|PSMA8_MOUSE Proteasome subunit alpha-type 7-like OS=Mus musculus OX=10090 GN=Psma8 PE=1 SV=1	Psma8	1	14	10	27.866	14973000	8.14543e+06	0.00120361	1.83821	14647000	14687000	15585000	6855500	8049300	9531500
Q9R1P4;A0A1B0GS70	proteasome (prosome, macropain) subunit, alpha type 1	\\sp|Q9R1P4|PSA1_MOUSE Proteasome subunit alpha type-1 OS=Mus musculus OX=10090 GN=Psma1 PE=1 SV=1;tr|A0A1B0GS70|A0A1B0GS70_MOUSE Isoform of Q9R1P4, Proteasome endopeptidase complex OS=Mus musculus OX=10090 GN=Psma1 PE=1 SV=1\\"\"\"\"\""	Psma1	2	17	17	29.546	2.64373e+07	14389000	0.000534771	1.83733	25822000	25397000	28093000	12849000	14555000	15763000
Q8K003	translational machinery associated 7	sp|Q8K003|TMA7_MOUSE Translation machinery-associated protein 7 OS=Mus musculus OX=10090 GN=Tma7 PE=3 SV=1	Tma7	1	2	2	7.0662	1.56607e+06	853063	0.000599391	1.83581	1591600	1454500	1652100	783410	844550	931230
Q9JIB0	RAN guanine nucleotide release factor	sp|Q9JIB0|MOG1_MOUSE Ran guanine nucleotide release factor OS=Mus musculus OX=10090 GN=Rangrf PE=1 SV=1	Rangrf	1	4	4	20.413	1.13963e+06	623297	0.00342586	1.82839	1244500	1050100	1124300	502340	671230	696320
Q80ZN5	cystatin 13	sp|Q80ZN5|CST13_MOUSE Cystatin-13 OS=Mus musculus OX=10090 GN=Cst13 PE=1 SV=1	Cst13	1	2	2	16.825	6.30413e+06	3449100	0.000331886	1.82776	6251600	6124400	6536400	3081300	3431700	3834300
A0A1W2P884;E9QA61	centrosomal protein 85-like	\\tr|A0A1W2P884|A0A1W2P884_MOUSE Centrosomal protein 85-like OS=Mus musculus OX=10090 GN=Cep85l PE=1 SV=1;tr|E9QA61|E9QA61_MOUSE Isoform of A0A1W2P884, Centrosomal protein 85-like OS=Mus musculus OX=10090 GN=Cep85l PE=1 SV=3\\"\"\"\"\""	Cep85l	2	27	27	91.83	17208000	9.41533e+06	0.000309743	1.82766	16966000	16655000	18003000	8516000	9379000	10351000
G3X906;E9PY36	RIKEN cDNA 1700029H14 gene	\\tr|G3X906|G3X906_MOUSE Isoform of E9PY36, RIKEN cDNA 1700029H14 gene OS=Mus musculus OX=10090 GN=1700029H14Rik PE=4 SV=1;tr|E9PY36|E9PY36_MOUSE RIKEN cDNA 1700029H14 gene OS=Mus musculus OX=10090 GN=1700029H14Rik PE=4 SV=1\\"\"\"\"\""	1700029H14Rik	2	29	2	24.281	1.37043e+08	7.50593e+07	0.00199868	1.8258	136230000	125340000	149560000	65033000	78897000	81248000
F6WEU2	coiled-coil domain containing 188	tr|F6WEU2|F6WEU2_MOUSE Coiled-coil domain-containing 188 OS=Mus musculus OX=10090 GN=Ccdc188 PE=4 SV=1	Ccdc188	1	5	5	27.121	3.69177e+06	2022100	0.000322636	1.82571	3567500	3586800	3921000	1904300	1967200	2194800
A0A0R4J0K8;Q7TMV1	ring finger protein 139	\\tr|A0A0R4J0K8|A0A0R4J0K8_MOUSE Isoform of Q7TMV1, E3 ubiquitin-protein ligase RNF139 OS=Mus musculus OX=10090 GN=Rnf139 PE=1 SV=1;sp|Q7TMV1|RN139_MOUSE E3 ubiquitin-protein ligase RNF139 OS=Mus musculus OX=10090 GN=Rnf139 PE=1 SV=1\\"\"\"\"\""	Rnf139	3	7	7	76.154	2.17427e+06	1191000	0.00236915	1.82558	2026200	2104200	2392400	1030100	1200200	1342700
Q149T7	protein phosphatase 1J	sp|Q149T7|PPM1J_MOUSE Protein phosphatase 1J OS=Mus musculus OX=10090 GN=Ppm1j PE=1 SV=1	Ppm1j	1	16	15	55.549	1.80047e+07	9.86277e+06	0.000516353	1.82552	17471000	17460000	19083000	8824400	9909900	10854000
B2RWK3;Q710D3	unc-93 homolog A2	tr|B2RWK3|B2RWK3_MOUSE Unc-93 homolog A (C. elegans) OS=Mus musculus OX=10090 GN=Unc93a2 PE=2 SV=1;sp|Q710D3|UN93A_MOUSE Protein unc-93 homolog A OS=Mus musculus OX=10090 GN=Unc93a PE=2 SV=1	Unc93a2	2	2	2	50.374	833647	457317	0.00589754	1.82291	719920	947570	833450	406940	483610	481400
P13020-2;P13020;A0A0J9YUQ8	gelsolin	\\sp|P13020-2|GELS_MOUSE Isoform of P13020, Isoform 2 of Gelsolin OS=Mus musculus OX=10090 GN=Gsn;sp|P13020|GELS_MOUSE Gelsolin OS=Mus musculus OX=10090 GN=Gsn PE=1 SV=3;tr|A0A0J9YUQ8|A0A0J9YUQ8_MOUSE Isoform of P13020, Gelsolin (Fragment) OS=Mus musculus OX\\"\"\"\"\""	Gsn	4	14	4	80.762	7019300	3.85627e+06	0.000327812	1.82023	6915200	6727000	7415700	3533400	3867500	4167900
D3Z5Y0;Q925F2	endothelial cell-specific adhesion molecule	\\tr|D3Z5Y0|D3Z5Y0_MOUSE Isoform of Q925F2, Endothelial cell-selective adhesion molecule (Fragment) OS=Mus musculus OX=10090 GN=Esam PE=1 SV=1;sp|Q925F2|ESAM_MOUSE Endothelial cell-selective adhesion molecule OS=Mus musculus OX=10090 GN=Esam PE=1 SV=1\\"\"\"\"\""	Esam	2	2	2	27.217	98233.3	54027	0.016817	1.81819	87280	102030	105390	34606	63957	63518
S4R225;Q91V09	WD repeat domain 13	\\tr|S4R225|S4R225_MOUSE Isoform of Q91V09, WD repeat-containing protein 13 OS=Mus musculus OX=10090 GN=Wdr13 PE=1 SV=1;sp|Q91V09|WDR13_MOUSE WD repeat-containing protein 13 OS=Mus musculus OX=10090 GN=Wdr13 PE=1 SV=1\\"\"\"\"\""	Wdr13	3	8	8	43.004	4.14033e+06	2.27757e+06	0.000714395	1.81788	4135300	3848900	4436800	2103900	2270500	2458300
P17710-2	hexokinase 1	\\sp|P17710-2|HXK1_MOUSE Isoform of P17710, Isoform HK1-SB of Hexokinase-1 OS=Mus musculus OX=10090 GN=Hk1\\"\"\"\"\""	Hk1	1	44	1	105.57	979590	539387	0.00240002	1.81611	923180	1056800	958790	438550	596020	583590
Q9D498;A0A087WSD7;A0A087WQS8	IQ motif containing F3	\\sp|Q9D498|IQCF3_MOUSE IQ domain-containing protein F3 OS=Mus musculus OX=10090 GN=Iqcf3 PE=2 SV=1;tr|A0A087WSD7|A0A087WSD7_MOUSE Isoform of Q9D498, IQ domain-containing protein F3 (Fragment) OS=Mus musculus OX=10090 GN=Iqcf3 PE=4 SV=6;tr|A0A087WQS8|A0A087W\\"\"\"\"\""	Iqcf3	4	5	5	23.5	876240	483223	0.00421553	1.81332	858780	779730	990210	437670	481430	530570
P43135;Q32NY6;Q60632;B8JJI9;F7CII1;D3YYP4;A0A140LJF1	nuclear receptor subfamily 2, group F, member 2	\\sp|P43135|COT2_MOUSE COUP transcription factor 2 OS=Mus musculus OX=10090 GN=Nr2f2 PE=1 SV=2;tr|Q32NY6|Q32NY6_MOUSE Isoform of Q60632, COUP transcription factor 1 OS=Mus musculus OX=10090 GN=Nr2f1 PE=1 SV=1;sp|Q60632|COT1_MOUSE COUP transcription factor 1 \\"\"\"\"\""	Nr2f2	7	4	4	45.571	535787	295663	0.0224736	1.81215	468450	668140	470770	293830	286540	306620
P61213	ADP-ribosylation factor-like 4A	sp|P61213|ARL4A_MOUSE ADP-ribosylation factor-like protein 4A OS=Mus musculus OX=10090 GN=Arl4a PE=2 SV=1	Arl4a	2	5	5	22.588	2.19587e+06	1.21187e+06	0.00130812	1.81197	2202500	2027900	2357200	1058900	1268100	1308600
P99026	proteasome (prosome, macropain) subunit, beta type 4	sp|P99026|PSB4_MOUSE Proteasome subunit beta type-4 OS=Mus musculus OX=10090 GN=Psmb4 PE=1 SV=1	Psmb4	1	5	5	29.116	5.73043e+06	3163200	0.00051141	1.81159	5717700	5409800	6063800	2845500	3247400	3396700
B1ATI9;Q3U432;Q60780;Q60780-2	growth arrest specific 7	\\tr|B1ATI9|B1ATI9_MOUSE Isoform of Q60780, Growth arrest-specific protein 7 OS=Mus musculus OX=10090 GN=Gas7 PE=1 SV=1;tr|Q3U432|Q3U432_MOUSE Isoform of Q60780, Growth arrest-specific protein 7 OS=Mus musculus OX=10090 GN=Gas7 PE=1 SV=1;sp|Q60780|GAS7_MOUSE\\"\"\"\"\""	Gas7	4	5	5	47.261	2.69797e+06	1.48953e+06	0.00222022	1.81128	2732500	2419200	2942200	1328900	1607100	1532600
A6H6T1	protease, serine 40	sp|A6H6T1|PRS40_MOUSE Serine protease 40 OS=Mus musculus OX=10090 GN=Prss40 PE=2 SV=2	Prss40	2	4	3	40.145	758017	418900	0.00179731	1.80954	756070	691790	826190	369690	443770	443240
Q9JJZ4;F6SPK0;B1AWT7	ubiquitin-conjugating enzyme E2J 1	\\sp|Q9JJZ4|UB2J1_MOUSE Ubiquitin-conjugating enzyme E2 J1 OS=Mus musculus OX=10090 GN=Ube2j1 PE=1 SV=2;tr|F6SPK0|F6SPK0_MOUSE Isoform of Q9JJZ4, Ubiquitin-conjugating enzyme E2 J1 (Fragment) OS=Mus musculus OX=10090 GN=Ube2j1 PE=1 SV=1;tr|B1AWT7|B1AWT7_MOUS\\"\"\"\"\""	Ube2j1	3	9	9	34.989	1.82297e+07	1.00747e+07	0.00146062	1.80944	19232000	16427000	19030000	9020200	10564000	10640000
P70296;D3Z1V4;D6RHS6	phosphatidylethanolamine binding protein 1	\\sp|P70296|PEBP1_MOUSE Phosphatidylethanolamine-binding protein 1 OS=Mus musculus OX=10090 GN=Pebp1 PE=1 SV=3;tr|D3Z1V4|D3Z1V4_MOUSE Isoform of P70296, Phosphatidylethanolamine-binding protein 1 OS=Mus musculus OX=10090 GN=Pebp1 PE=1 SV=1;tr|D6RHS6|D6RHS6_M\\"\"\"\"\""	Pebp1	3	11	10	20.83	2.36403e+07	13069000	0.000390361	1.80889	22470000	23776000	24675000	11730000	13286000	14191000
Q99PU5	acyl-CoA synthetase bubblegum family member 1	sp|Q99PU5|ACBG1_MOUSE Long-chain-fatty-acid--CoA ligase ACSBG1 OS=Mus musculus OX=10090 GN=Acsbg1 PE=1 SV=1	Acsbg1	1	16	14	80.425	9.88973e+06	5469500	0.000402475	1.80816	9799300	9435900	10434000	4930000	5597700	5880800
A0A0B4J1E9;Q9D2J4-2;Q9D2J4	V-set and immunoglobulin domain containing 1	\\tr|A0A0B4J1E9|A0A0B4J1E9_MOUSE Isoform of Q9D2J4, V-set and immunoglobulin domain-containing protein 1 OS=Mus musculus OX=10090 GN=Vsig1 PE=1 SV=1;sp|Q9D2J4-2|VSIG1_MOUSE Isoform of Q9D2J4, Isoform 2 of V-set and immunoglobulin domain-containing protein 1 \\"\"\"\"\""	Vsig1	3	3	3	44.006	2.02523e+06	1.12027e+06	0.00109412	1.80781	2103500	1855800	2116400	1041500	1067400	1251900
A0A140T8R8;A0A0G2JGV7;Q3UT23;A0A1Y7VP24;Q9QZ73;A0A0G2JEA2;A0A0G2JDN9;A0A1B0GXL7;A0A0G2JDM0	DCN1, defective in cullin neddylation 1, domain containing 1 (S. cerevisiae)	\\tr|A0A140T8R8|A0A140T8R8_MOUSE Isoform of Q9QZ73, DCN1-like protein (Fragment) OS=Mus musculus OX=10090 GN=Dcun1d1 PE=1 SV=1;tr|A0A0G2JGV7|A0A0G2JGV7_MOUSE Isoform of Q9QZ73, DCN1-like protein (Fragment) OS=Mus musculus OX=10090 GN=Dcun1d1 PE=1 SV=1;tr|Q3U\\"\"\"\"\""	Dcun1d1	15	5	5	24.94	4.78657e+06	2650700	0.000703059	1.80577	4507200	4755800	5096700	2457600	2552000	2942500
Q9EST4-3;Q9EST4	proteasome (prosome, macropain) assembly chaperone 2	\\sp|Q9EST4-3|PSMG2_MOUSE Isoform of Q9EST4, Isoform 3 of Proteasome assembly chaperone 2 OS=Mus musculus OX=10090 GN=Psmg2;sp|Q9EST4|PSMG2_MOUSE Proteasome assembly chaperone 2 OS=Mus musculus OX=10090 GN=Psmg2 PE=1 SV=1\\"\"\"\"\""	Psmg2	3	7	7	25.351	3590700	1.98943e+06	0.00024279	1.80488	3534200	3555600	3682300	1766300	2022000	2180000
Q8C5U0;F6YRC2	RIKEN cDNA 4933409G03 gene	\\tr|Q8C5U0|Q8C5U0_MOUSE RIKEN cDNA 4933409G03 gene OS=Mus musculus OX=10090 GN=4933409G03Rik PE=1 SV=1;tr|F6YRC2|F6YRC2_MOUSE Isoform of Q8C5U0, RIKEN cDNA 4933409G03 gene (Fragment) OS=Mus musculus OX=10090 GN=4933409G03Rik PE=4 SV=1\\"\"\"\"\""	4933409G03Rik	2	4	4	35.182	1.96387e+06	1088140	0.000311857	1.80479	1932000	1900400	2059200	979720	1109000	1175700
Q9D416	ADP-ribosylation factor-like 13A	sp|Q9D416|AR13A_MOUSE ADP-ribosylation factor-like protein 13A OS=Mus musculus OX=10090 GN=Arl13a PE=2 SV=1	Arl13a	1	6	6	43.463	2.61103e+06	1.44693e+06	0.000147297	1.80453	2570900	2532400	2729800	1338600	1474100	1528100
O70250	phosphoglycerate mutase 2	sp|O70250|PGAM2_MOUSE Phosphoglycerate mutase 2 OS=Mus musculus OX=10090 GN=Pgam2 PE=1 SV=3	Pgam2	1	17	12	28.827	6.17817e+07	3.42663e+07	0.00094785	1.80298	60752000	58297000	66296000	30178000	35629000	36992000
Q9D771	transmembrane protein 206	sp|Q9D771|TM206_MOUSE Transmembrane protein 206 OS=Mus musculus OX=10090 GN=Tmem206 PE=1 SV=1	Tmem206	1	4	4	40.178	1.51743e+06	842227	0.00102989	1.80169	1489000	1440600	1622700	737260	855030	934390
Q62087	paraoxonase 3	sp|Q62087|PON3_MOUSE Serum paraoxonase/lactonase 3 OS=Mus musculus OX=10090 GN=Pon3 PE=1 SV=2	Pon3	1	4	4	39.351	2674100	1.48487e+06	0.000185954	1.8009	2604100	2630800	2787400	1366600	1482600	1605400
A0A087WQS2;Q9CQC6;A0A087WPF9	basic leucine zipper and W2 domains 1	\\tr|A0A087WQS2|A0A087WQS2_MOUSE Isoform of Q9CQC6, Basic leucine zipper and W2 domain-containing protein 1 OS=Mus musculus OX=10090 GN=Bzw1 PE=1 SV=1;sp|Q9CQC6|BZW1_MOUSE Basic leucine zipper and W2 domain-containing protein 1 OS=Mus musculus OX=10090 GN=Bz\\"\"\"\"\""	Bzw1	4	18	17	51.209	23051000	1.28003e+07	0.000551748	1.80081	22337000	22286000	24530000	11577000	12813000	14011000
B9EJ80	PDZ domain containing 8	sp|B9EJ80|PDZD8_MOUSE PDZ domain-containing protein 8 OS=Mus musculus OX=10090 GN=Pdzd8 PE=1 SV=1	Pdzd8	1	43	43	127.74	42768000	2.38297e+07	0.00053307	1.79474	42559000	40880000	44865000	21036000	24443000	26010000
Q8BYI6-2;Q8BYI6	lysophosphatidylcholine acyltransferase 2	\\sp|Q8BYI6-2|PCAT2_MOUSE Isoform of Q8BYI6, Isoform 2 of Lysophosphatidylcholine acyltransferase 2 OS=Mus musculus OX=10090 GN=Lpcat2;sp|Q8BYI6|PCAT2_MOUSE Lysophosphatidylcholine acyltransferase 2 OS=Mus musculus OX=10090 GN=Lpcat2 PE=1 SV=1\\"\"\"\"\""	Lpcat2	2	2	2	55.871	153657	85634.7	0.000128043	1.79431	145760	155290	159920	81882	85950	89072
Q925P2-3;Q925P2-2;Q925P2	carcinoembryonic antigen-related cell adhesion molecule 2	\\sp|Q925P2-3|CEAM2_MOUSE Isoform of Q925P2, Isoform 3 of Carcinoembryonic antigen-related cell adhesion molecule 2 OS=Mus musculus OX=10090 GN=Ceacam2;sp|Q925P2-2|CEAM2_MOUSE Isoform of Q925P2, Isoform 2 of Carcinoembryonic antigen-related cell adhesion mol\\"\"\"\"\""	Ceacam2	3	4	4	29.983	531730	296520	0.00176071	1.79323	563380	492080	539730	249500	313910	326150
P97401	frizzled-related protein	sp|P97401|SFRP3_MOUSE Secreted frizzled-related protein 3 OS=Mus musculus OX=10090 GN=Frzb PE=1 SV=1	Frzb	1	5	5	36.011	5.98213e+06	3.33657e+06	0.0018898	1.7929	5486800	6507800	5951800	3249900	3020700	3739100
O70291	G protein-coupled receptor kinase 4	sp|O70291|GRK4_MOUSE G protein-coupled receptor kinase 4 OS=Mus musculus OX=10090 GN=Grk4 PE=2 SV=2	Grk4	8	8	6	66.927	4531200	2527900	0.000654332	1.79248	4320100	4878700	4394800	2484900	2357300	2741500
E9Q0C6	predicted gene 14569	sp|E9Q0C6|K1210_MOUSE Acrosomal protein KIAA1210 OS=Mus musculus OX=10090 GN=Kiaa1210 PE=1 SV=1	Gm14569	1	65	65	181.03	7.56927e+07	4.22687e+07	0.000861472	1.79075	74334000	71681000	81063000	38015000	42190000	46601000
Q9EQ08;B1ATE0	N-sulfoglucosamine sulfohydrolase (sulfamidase)	\\tr|Q9EQ08|Q9EQ08_MOUSE Heparan N-sulfatase OS=Mus musculus OX=10090 GN=Sgsh PE=1 SV=1;tr|B1ATE0|B1ATE0_MOUSE Isoform of Q9EQ08, N-sulfoglucosamine sulfohydrolase (sulfamidase) OS=Mus musculus OX=10090 GN=Sgsh PE=1 SV=1\\"\"\"\"\""	Sgsh	2	2	2	56.722	479183	267897	0.000788985	1.78868	495640	470500	471410	225160	284420	294110
Q9CYA0	cysteine-rich with EGF-like domains 2	sp|Q9CYA0|CREL2_MOUSE Cysteine-rich with EGF-like domain protein 2 OS=Mus musculus OX=10090 GN=Creld2 PE=1 SV=1	Creld2	1	16	16	38.219	140890000	7.88707e+07	0.00116679	1.78634	137410000	136800000	148460000	65932000	85021000	85659000
Q6NSR8	aminopeptidase-like 1	sp|Q6NSR8|PEPL1_MOUSE Probable aminopeptidase NPEPL1 OS=Mus musculus OX=10090 GN=Npepl1 PE=1 SV=1	Npepl1	2	3	3	55.939	225240	126150	0.00242436	1.78548	231940	200980	242800	112840	138340	127270
Q9CZS1	aldehyde dehydrogenase 1 family, member B1	\\sp|Q9CZS1|AL1B1_MOUSE Aldehyde dehydrogenase X, mitochondrial OS=Mus musculus OX=10090 GN=Aldh1b1 PE=1 SV=1\\"\"\"\"\""	Aldh1b1	4	20	14	57.552	2.17213e+07	1.21657e+07	0.000663894	1.78546	21625000	20406000	23133000	10949000	12676000	12872000
D3Z6I8;E9Q7Q3	tropomyosin 3, gamma	\\tr|D3Z6I8|D3Z6I8_MOUSE Isoform of P21107, Tropomyosin alpha-3 chain OS=Mus musculus OX=10090 GN=Tpm3 PE=1 SV=1;tr|E9Q7Q3|E9Q7Q3_MOUSE Isoform of P21107, Tropomyosin alpha-3 chain OS=Mus musculus OX=10090 GN=Tpm3 PE=1 SV=1\\"\"\"\"\""	Tpm3	2	25	0	28.723	1.20597e+06	676503	0.00599025	1.78264	1167100	1076000	1374800	611290	654070	764150
F2Z3X6;Q9Z2A0;F2Z3Z9;Q3TRL2;F2Z400	3-phosphoinositide dependent protein kinase 1	\\tr|F2Z3X6|F2Z3X6_MOUSE Isoform of Q9Z2A0, 3-phosphoinositide-dependent protein kinase 1 OS=Mus musculus OX=10090 GN=Pdpk1 PE=1 SV=1;sp|Q9Z2A0|PDPK1_MOUSE 3-phosphoinositide-dependent protein kinase 1 OS=Mus musculus OX=10090 GN=Pdpk1 PE=1 SV=2;tr|F2Z3Z9|F2\\"\"\"\"\""	Pdpk1	6	12	12	60.935	3.37513e+06	1.89397e+06	0.000270015	1.78204	3447300	3229100	3449000	1728500	1883800	2069600
A0A1B0GT45	predicted gene, 39566	tr|A0A1B0GT45|A0A1B0GT45_MOUSE Uncharacterized protein OS=Mus musculus OX=10090 GN=Gm39566 PE=4 SV=1	Gm39566	1	46	46	136.34	37288000	20938000	0.000479349	1.78088	36441000	36174000	39249000	18602000	21479000	22733000
A0A087WQH1	LEM domain containing 1	\\tr|A0A087WQH1|A0A087WQH1_MOUSE Isoform of Q14C37, LEM domain-containing protein 1 OS=Mus musculus OX=10090 GN=Lemd1 PE=4 SV=1\\"\"\"\"\""	Lemd1	5	5	5	23.399	1940600	1090000	0.000217101	1.78037	1968300	1911200	1942300	1012500	1039300	1218200
P00342;A0A1B0GRE9;D3YVR7;D3YZE4	lactate dehydrogenase C	\\sp|P00342|LDHC_MOUSE L-lactate dehydrogenase C chain OS=Mus musculus OX=10090 GN=Ldhc PE=1 SV=2;tr|A0A1B0GRE9|A0A1B0GRE9_MOUSE Isoform of P00342, L-lactate dehydrogenase C chain OS=Mus musculus OX=10090 GN=Ldhc PE=1 SV=1;tr|D3YVR7|D3YVR7_MOUSE Isoform of P\\"\"\"\"\""	Ldhc	5	21	19	35.911	7.69327e+08	432150000	0.00151249	1.78023	742980000	726850000	838150000	383410000	438710000	474330000
O55234;Q8BTY5	proteasome (prosome, macropain) subunit, beta type 5	\\sp|O55234|PSB5_MOUSE Proteasome subunit beta type-5 OS=Mus musculus OX=10090 GN=Psmb5 PE=1 SV=3;tr|Q8BTY5|Q8BTY5_MOUSE Isoform of O55234, Proteasome subunit beta type-5 OS=Mus musculus OX=10090 GN=Psmb5 PE=1 SV=1\\"\"\"\"\""	Psmb5	2	14	14	28.532	1.66983e+07	9380700	0.00032457	1.78007	16735000	15789000	17571000	8668400	9547800	9925900
Q9DA59	RIKEN cDNA 1700020A23 gene	tr|Q9DA59|Q9DA59_MOUSE MCG9903 OS=Mus musculus OX=10090 GN=1700020A23Rik PE=2 SV=1	1700020A23Rik	1	1	1	13.696	149813	84177.3	0.000851142	1.77971	157060	136430	155950	80956	81563	90013
Q9CRY7	glycerophosphodiester phosphodiesterase domain containing 1	sp|Q9CRY7|GDPD1_MOUSE Lysophospholipase D GDPD1 OS=Mus musculus OX=10090 GN=Gdpd1 PE=1 SV=1	Gdpd1	1	11	11	35.866	1.20987e+07	6.80463e+06	0.00600947	1.778	12537000	10489000	13270000	5758600	7599000	7056300
Q9DCJ9	N-acetylneuraminate pyruvate lyase	sp|Q9DCJ9|NPL_MOUSE N-acetylneuraminate lyase OS=Mus musculus OX=10090 GN=Npl PE=1 SV=1	Npl	1	3	3	35.13	810577	455943	0.000274755	1.7778	859020	761530	811180	438230	465350	464250
Q80W21;D3YVP6;D3YVP5;E9QAC8	glutathione S-transferase, mu 7	\\sp|Q80W21|GSTM7_MOUSE Glutathione S-transferase Mu 7 OS=Mus musculus OX=10090 GN=Gstm7 PE=1 SV=1;tr|D3YVP6|D3YVP6_MOUSE Isoform of Q80W21, Glutathione S-transferase Mu 7 OS=Mus musculus OX=10090 GN=Gstm7 PE=1 SV=2;tr|D3YVP5|D3YVP5_MOUSE Isoform of Q80W21, \\"\"\"\"\""	Gstm7	5	14	6	25.709	2.24403e+06	1.26237e+06	0.000770672	1.77764	2200900	2194200	2337000	1071300	1344700	1371100
P47757-4;A2AMW0;P47757-2	capping protein (actin filament) muscle Z-line, beta	\\sp|P47757-4|CAPZB_MOUSE Isoform of P47757, Isoform 3 of F-actin-capping protein subunit beta OS=Mus musculus OX=10090 GN=Capzb;tr|A2AMW0|A2AMW0_MOUSE Isoform of P47757, Capping protein (Actin filament) muscle Z-line, beta, isoform CRA_a OS=Mus musculus OX=\\"\"\"\"\""	Capzb	3	20	3	33.767	4.88587e+07	2.74877e+07	0.00103	1.77748	48272000	45727000	52577000	24629000	28110000	29724000
Q8K4I3;F6WMJ3;A2AFJ8;H3BKQ0	Rac/Cdc42 guanine nucleotide exchange factor (GEF) 6	\\sp|Q8K4I3|ARHG6_MOUSE Rho guanine nucleotide exchange factor 6 OS=Mus musculus OX=10090 GN=Arhgef6 PE=1 SV=1;tr|F6WMJ3|F6WMJ3_MOUSE Isoform of Q8K4I3, Rho guanine nucleotide exchange factor 6 OS=Mus musculus OX=10090 GN=Arhgef6 PE=1 SV=1;tr|A2AFJ8|A2AFJ8_M\\"\"\"\"\""	Arhgef6	5	13	10	87.051	4.69353e+06	2.64263e+06	0.000720285	1.77608	4581800	4523700	4975100	2325900	2711900	2890100
I6L9E6;V9GXH0	EF-hand calcium binding domain 12	\\tr|I6L9E6|I6L9E6_MOUSE Isoform of V9GXH0, BC060267 protein OS=Mus musculus OX=10090 GN=Efcab12 PE=2 SV=1;tr|V9GXH0|V9GXH0_MOUSE EF-hand calcium-binding domain 12 OS=Mus musculus OX=10090 GN=Efcab12 PE=4 SV=1\\"\"\"\"\""	Efcab12	2	2	2	45.052	2.68173e+06	1.51033e+06	0.0026043	1.77559	2679900	2438900	2926400	1305000	1646000	1580000
Q8C634	RIKEN cDNA 4922502D21 gene	tr|Q8C634|Q8C634_MOUSE C-type lectin-like receptor 2m OS=Mus musculus OX=10090 GN=4922502D21Rik PE=2 SV=1	4922502D21Rik	2	9	9	22.107	10046700	5659200	0.000653006	1.77529	9657500	9899600	10583000	4935600	6053500	5988500
Q2NKH9	glycosyltransferase 6 domain containing 1	sp|Q2NKH9|GL6D1_MOUSE Glycosyltransferase 6 domain-containing protein 1 OS=Mus musculus OX=10090 GN=Glt6d1 PE=2 SV=1	Glt6d1	1	5	5	37.081	1621500	914103	0.000342752	1.77387	1587900	1625500	1651100	802510	934000	1005800
O35469;P26150;P26149	hydroxy-delta-5-steroid dehydrogenase, 3 beta- and steroid delta-isomerase 6	sp|O35469|3BHS6_MOUSE 3 beta-hydroxysteroid dehydrogenase/Delta 5-->4-isomerase type 6 OS=Mus musculus OX=10090 GN=Hsd3b6 PE=1 SV=4;sp|P26150|3BHS3_MOUSE 3 beta-hydroxysteroid dehydrogenase/Delta 5-->4-isomerase type 3 OS=Mus musculus OX=10090 GN=Hsd3b3 PE	Hsd3b6	4	6	4	41.977	4034300	2.27463e+06	0.00139105	1.7736	3913300	3819400	4370200	2017200	2291800	2514900
G5E8M9;P35330;B1ARJ2;G3UWJ5	intercellular adhesion molecule 2	\\tr|G5E8M9|G5E8M9_MOUSE Isoform of P35330, Intercellular adhesion molecule 2 (Fragment) OS=Mus musculus OX=10090 GN=Icam2 PE=1 SV=1;sp|P35330|ICAM2_MOUSE Intercellular adhesion molecule 2 OS=Mus musculus OX=10090 GN=Icam2 PE=1 SV=1;tr|B1ARJ2|B1ARJ2_MOUSE Is\\"\"\"\"\""	Icam2	4	2	2	18.283	291690	164557	0.0109561	1.77257	290140	244290	340640	154410	166200	173060
Q8R3I2-3;A0A217FL69;Q8R3I2-2;Q8R3I2	membrane bound O-acyltransferase domain containing 2	\\sp|Q8R3I2-3|MBOA2_MOUSE Isoform of Q8R3I2, Isoform 3 of Lysophospholipid acyltransferase 2 OS=Mus musculus OX=10090 GN=Mboat2;tr|A0A217FL69|A0A217FL69_MOUSE Isoform of Q8R3I2, Lysophospholipid acyltransferase 2 OS=Mus musculus OX=10090 GN=Mboat2 PE=1 SV=1;\\"\"\"\"\""	Mboat2	4	3	3	43.296	714177	403900	0.0138043	1.7682	740050	597740	804740	325790	468630	417280
Q2XU92	acyl-CoA synthetase bubblegum family member 2	sp|Q2XU92|ACBG2_MOUSE Long-chain-fatty-acid--CoA ligase ACSBG2 OS=Mus musculus OX=10090 GN=Acsbg2 PE=1 SV=1	Acsbg2	1	10	10	74.318	2.63907e+06	1.49333e+06	0.000227789	1.76723	2667700	2498300	2751200	1390600	1528800	1560600
G3X9J5;Q9WV74;A0A087WQE9;S4W6L8	ankyrin repeat and SOCS box-containing 1	\\tr|G3X9J5|G3X9J5_MOUSE Isoform of Q9WV74, Ankyrin repeat and SOCS box protein 1 OS=Mus musculus OX=10090 GN=Asb1 PE=1 SV=1;sp|Q9WV74|ASB1_MOUSE Ankyrin repeat and SOCS box protein 1 OS=Mus musculus OX=10090 GN=Asb1 PE=2 SV=1;tr|A0A087WQE9|A0A087WQE9_MOUSE \\"\"\"\"\""	Asb1	6	7	7	36.563	2.33777e+06	1323300	0.000318289	1.76662	2257700	2315700	2439900	1202100	1325900	1441900
Q8VEF1-2;F8WJ74;Q8VEF1-3;Q8VEF1;A0A0J9YU69	GRAM domain containing 1A	\\sp|Q8VEF1-2|GRM1A_MOUSE Isoform of Q8VEF1, Isoform 2 of GRAM domain-containing protein 1A OS=Mus musculus OX=10090 GN=Gramd1a;tr|F8WJ74|F8WJ74_MOUSE Isoform of Q8VEF1, GRAM domain-containing protein 1A OS=Mus musculus OX=10090 GN=Gramd1a PE=1 SV=1;sp|Q8VEF\\"\"\"\"\""	Gramd1a	5	2	1	54.85	128337	72700	0.001193	1.76527	130100	116780	138130	73798	67658	76644
Q9DAL3	coiled-coil domain containing 54	sp|Q9DAL3|CCD54_MOUSE Coiled-coil domain-containing protein 54 OS=Mus musculus OX=10090 GN=Ccdc54 PE=2 SV=1	Ccdc54	1	19	19	37.517	2.92587e+07	1.65787e+07	0.00100651	1.76484	29122000	27345000	31309000	14871000	16801000	18064000
O70435	proteasome (prosome, macropain) subunit, alpha type 3	sp|O70435|PSA3_MOUSE Proteasome subunit alpha type-3 OS=Mus musculus OX=10090 GN=Psma3 PE=1 SV=3	Psma3	5	15	15	28.405	3.16607e+07	1.79613e+07	0.000901214	1.76271	31301000	30008000	33673000	15901000	18247000	19736000
A0A0J9YTY0;Q8C1B7-3;Q8C1B7-2;Q8C1B7;A0A0J9YUL3;Q9R1T4-2;Q9R1T4-3;Q9R1T4	septin 11	\\tr|A0A0J9YTY0|A0A0J9YTY0_MOUSE Isoform of Q8C1B7, Septin-11 OS=Mus musculus OX=10090 GN=Sept11 PE=1 SV=1;sp|Q8C1B7-3|SEP11_MOUSE Isoform of Q8C1B7, Isoform 3 of Septin-11 OS=Mus musculus OX=10090 GN=Sept11;sp|Q8C1B7-2|SEP11_MOUSE Isoform of Q8C1B7, Isoform\\"\"\"\"\""	2019-09-11	11	6	4	48.978	1.43107e+06	813363	0.000110842	1.75944	1379800	1452900	1460500	766580	799820	873690
Q9DBL1;E9Q5L3	acyl-Coenzyme A dehydrogenase, short/branched chain	\\sp|Q9DBL1|ACDSB_MOUSE Short/branched chain specific acyl-CoA dehydrogenase, mitochondrial OS=Mus musculus OX=10090 GN=Acadsb PE=1 SV=1;tr|E9Q5L3|E9Q5L3_MOUSE Isoform of Q9DBL1, Short/branched chain-specific acyl-CoA dehydrogenase, mitochondrial OS=Mus musc\\"\"\"\"\""	Acadsb	2	8	8	47.874	5995000	3.40747e+06	0.00076552	1.75937	5894600	5669200	6421200	3078400	3497300	3646700
Q9Z247	FK506 binding protein 9	sp|Q9Z247|FKBP9_MOUSE Peptidyl-prolyl cis-trans isomerase FKBP9 OS=Mus musculus OX=10090 GN=Fkbp9 PE=1 SV=1	Fkbp9	1	9	9	62.995	3.45847e+06	1.96617e+06	0.000386091	1.75899	3360500	3379100	3635800	1771100	2010300	2117100
Q61024	asparagine synthetase	sp|Q61024|ASNS_MOUSE Asparagine synthetase [glutamine-hydrolyzing] OS=Mus musculus OX=10090 GN=Asns PE=1 SV=3	Asns	4	20	20	64.282	2.15087e+07	1.22337e+07	0.00103618	1.75815	21275000	20128000	23123000	11096000	12262000	13343000
Q6UQ17;Q0VF52	ATPase, class I, type 8B, member 3	\\sp|Q6UQ17|AT8B3_MOUSE Phospholipid-transporting ATPase IK OS=Mus musculus OX=10090 GN=Atp8b3 PE=1 SV=1;tr|Q0VF52|Q0VF52_MOUSE Isoform of Q6UQ17, Phospholipid-transporting ATPase OS=Mus musculus OX=10090 GN=Atp8b3 PE=2 SV=1\\"\"\"\"\""	Atp8b3	6	27	27	151.95	1.03578e+07	5895300	0.00106507	1.75695	10458000	9562300	11053000	5319400	6038400	6328100
Q9Z2I8;Q9Z2I8-2	succinate-Coenzyme A ligase, GDP-forming, beta subunit	\\sp|Q9Z2I8|SUCB2_MOUSE Succinate--CoA ligase [GDP-forming] subunit beta, mitochondrial OS=Mus musculus OX=10090 GN=Suclg2 PE=1 SV=3;sp|Q9Z2I8-2|SUCB2_MOUSE Isoform of Q9Z2I8, Isoform 2 of Succinate--CoA ligase [GDP-forming] subunit beta, mitochondrial OS=Mu\\"\"\"\"\""	Suclg2	3	18	18	46.839	12721000	7.24193e+06	0.00120719	1.75657	13099000	11814000	13250000	6336500	7373600	8015700
Q9Z329;Q9Z329-3;Q9Z329-2	inositol 1,4,5-triphosphate receptor 2	\\sp|Q9Z329|ITPR2_MOUSE Inositol 1,4,5-trisphosphate receptor type 2 OS=Mus musculus OX=10090 GN=Itpr2 PE=1 SV=4;sp|Q9Z329-3|ITPR2_MOUSE Isoform of Q9Z329, Isoform 3 of Inositol 1,4,5-trisphosphate receptor type 2 OS=Mus musculus OX=10090 GN=Itpr2;sp|Q9Z329-\\"\"\"\"\""	Itpr2	5	34	23	307.47	7.03583e+06	4007200	0.000741618	1.7558	7396800	6622500	7088200	3556400	4117200	4348000
Q921X9	protein disulfide isomerase associated 5	sp|Q921X9|PDIA5_MOUSE Protein disulfide-isomerase A5 OS=Mus musculus OX=10090 GN=Pdia5 PE=1 SV=1	Pdia5	1	14	14	59.266	1.31027e+07	7.46487e+06	0.000290327	1.75524	12839000	12691000	13778000	6876500	7491000	8027100
P15105	glutamate-ammonia ligase (glutamine synthetase)	sp|P15105|GLNA_MOUSE Glutamine synthetase OS=Mus musculus OX=10090 GN=Glul PE=1 SV=6	Glul	3	13	13	42.119	1.90483e+07	1.08605e+07	0.000535244	1.7539	18874000	18173000	20098000	9904600	10767000	11910000
Q6P902;H7BX21	thioredoxin domain containing 2 (spermatozoa)	\\sp|Q6P902|TXND2_MOUSE Thioredoxin domain-containing protein 2 OS=Mus musculus OX=10090 GN=Txndc2 PE=1 SV=1;tr|H7BX21|H7BX21_MOUSE Isoform of Q6P902, Thioredoxin domain-containing protein 2 OS=Mus musculus OX=10090 GN=Txndc2 PE=1 SV=1\\"\"\"\"\""	Txndc2	2	18	18	57.766	29559000	1.68557e+07	0.00110983	1.75365	28987000	28143000	31547000	14699000	17419000	18449000
Q5SSW2	proteasome (prosome, macropain) activator subunit 4	sp|Q5SSW2|PSME4_MOUSE Proteasome activator complex subunit 4 OS=Mus musculus OX=10090 GN=Psme4 PE=1 SV=1	Psme4	4	40	40	211.19	1.78633e+07	1.01908e+07	0.00114674	1.75288	17576000	16853000	19161000	9009500	10437000	11126000
A0A1B0GRJ3;A0A1B0GS05	predicted gene 6657	\\tr|A0A1B0GRJ3|A0A1B0GRJ3_MOUSE Predicted gene 6657 OS=Mus musculus OX=10090 GN=Gm6657 PE=4 SV=2;tr|A0A1B0GS05|A0A1B0GS05_MOUSE Isoform of A0A1B0GRJ3, MCG52111 OS=Mus musculus OX=10090 GN=Gm6657 PE=4 SV=1\\"\"\"\"\""	Gm6657	3	6	6	32.307	2.33477e+06	1332100	0.0022392	1.75269	2140900	2566500	2296900	1272700	1246700	1476900
B1B0C7;E9PZ16;Q05793	perlecan (heparan sulfate proteoglycan 2)	\\tr|B1B0C7|B1B0C7_MOUSE Isoform of Q05793, Basement membrane-specific heparan sulfate proteoglycan core protein OS=Mus musculus OX=10090 GN=Hspg2 PE=1 SV=1;tr|E9PZ16|E9PZ16_MOUSE Isoform of Q05793, Basement membrane-specific heparan sulfate proteoglycan cor\\"\"\"\"\""	Hspg2	3	35	35	469.02	1.10983e+07	6.33217e+06	0.00106738	1.75269	11585000	10585000	11125000	5367600	6867100	6761800
Q8VCX5;Q8VCX5-3;Q8VCX5-2;E9Q9E0	mitochondrial calcium uptake 1	\\sp|Q8VCX5|MICU1_MOUSE Calcium uptake protein 1, mitochondrial OS=Mus musculus OX=10090 GN=Micu1 PE=1 SV=1;sp|Q8VCX5-3|MICU1_MOUSE Isoform of Q8VCX5, Isoform 3 of Calcium uptake protein 1, mitochondrial OS=Mus musculus OX=10090 GN=Micu1;sp|Q8VCX5-2|MICU1_MO\\"\"\"\"\""	Micu1	4	8	8	54.352	5.07343e+06	2895400	0.00148131	1.75224	5053100	4668700	5498500	2619400	2953800	3113000
O88531;B1B0P8;B1B0P9	palmitoyl-protein thioesterase 1	\\sp|O88531|PPT1_MOUSE Palmitoyl-protein thioesterase 1 OS=Mus musculus OX=10090 GN=Ppt1 PE=1 SV=2;tr|B1B0P8|B1B0P8_MOUSE Isoform of O88531, Palmitoyl-protein thioesterase 1 OS=Mus musculus OX=10090 GN=Ppt1 PE=1 SV=1;tr|B1B0P9|B1B0P9_MOUSE Isoform of O88531,\\"\"\"\"\""	Ppt1	3	10	10	34.49	13593000	7761200	0.00115362	1.7514	13203000	13046000	14530000	6716600	8277500	8289500
G5E8H0;Q91YD6-2;G5E8C6;Q91YD6	villin-like	\\tr|G5E8H0|G5E8H0_MOUSE Isoform of Q91YD6, Villin-like protein OS=Mus musculus OX=10090 GN=Vill PE=1 SV=1;sp|Q91YD6-2|VILL_MOUSE Isoform of Q91YD6, Isoform 2 of Villin-like protein OS=Mus musculus OX=10090 GN=Vill;tr|G5E8C6|G5E8C6_MOUSE Isoform of Q91YD6, V\\"\"\"\"\""	Vill	4	3	3	86.908	444177	253653	0.0119005	1.75111	456380	370870	505280	217770	281060	262130
A0A0G2JGW6;A0A0G2JF79;Q3UTQ8;A0A0G2JFE2	cyclin-dependent kinase-like 5	\\tr|A0A0G2JGW6|A0A0G2JGW6_MOUSE Isoform of Q3UTQ8, Cyclin-dependent kinase-like 5 OS=Mus musculus OX=10090 GN=Cdkl5 PE=1 SV=1;tr|A0A0G2JF79|A0A0G2JF79_MOUSE Isoform of Q3UTQ8, Cyclin-dependent kinase-like 5 OS=Mus musculus OX=10090 GN=Cdkl5 PE=1 SV=1;sp|Q3U\\"\"\"\"\""	Cdkl5	8	7	6	107.57	3.95863e+06	2.26303e+06	0.00524289	1.74926	3700500	3759500	4415900	1855300	2481700	2452100
B2KF25;Q01755;B2KF23;Q5FWA2;B2KF24	t-complex protein 11	\\tr|B2KF25|B2KF25_MOUSE Isoform of Q01755, T-complex protein 11 OS=Mus musculus OX=10090 GN=Tcp11 PE=1 SV=1;sp|Q01755|TCP11_MOUSE T-complex protein 11 OS=Mus musculus OX=10090 GN=Tcp11 PE=1 SV=1;tr|B2KF23|B2KF23_MOUSE Isoform of Q01755, T-complex protein 11\\"\"\"\"\""	Tcp11	5	15	15	62.136	32322000	1.85077e+07	0.00124173	1.74641	32145000	30019000	34802000	16591000	19077000	19855000
F7BF80	carnitine acetyltransferase	\\tr|F7BF80|F7BF80_MOUSE Isoform of P47934, Carnitine O-acetyltransferase (Fragment) OS=Mus musculus OX=10090 GN=Crat PE=1 SV=1\\"\"\"\"\""	Crat	1	10	1	22.536	2.59997e+06	1.48933e+06	0.00356183	1.74572	2432100	2485600	2882200	1268400	1631600	1568000
Q62048-2;Q62048;D3Z375	phosphoprotein enriched in astrocytes 15A	\\sp|Q62048-2|PEA15_MOUSE Isoform of Q62048, Isoform 2 of Astrocytic phosphoprotein PEA-15 OS=Mus musculus OX=10090 GN=Pea15;sp|Q62048|PEA15_MOUSE Astrocytic phosphoprotein PEA-15 OS=Mus musculus OX=10090 GN=Pea15 PE=1 SV=1;tr|D3Z375|D3Z375_MOUSE Isoform of \\"\"\"\"\""	Pea15a	3	2	2	12.544	803920	460537	0.00442952	1.74561	797430	723280	891050	392920	486360	502330
Q62100	protamine 3	sp|Q62100|PRM3_MOUSE Protamine-3 OS=Mus musculus OX=10090 GN=Prm3 PE=1 SV=2	Prm3	1	6	6	11.166	3.71083e+06	2126000	0.00971434	1.74545	4011400	3072700	4048400	1932300	2097600	2348100
P48962	solute carrier family 25 (mitochondrial carrier, adenine nucleotide translocator), member 4	sp|P48962|ADT1_MOUSE ADP/ATP translocase 1 OS=Mus musculus OX=10090 GN=Slc25a4 PE=1 SV=4	Slc25a4	1	21	10	32.904	35397000	20282000	0.000412066	1.74524	35188000	34098000	36905000	18205000	20544000	22097000
Q8CH20;Q8CH20-2	cysteine-rich perinuclear theca 1	\\sp|Q8CH20|CYPT1_MOUSE Cysteine-rich perinuclear theca protein 1 OS=Mus musculus OX=10090 GN=Cypt1 PE=1 SV=1;sp|Q8CH20-2|CYPT1_MOUSE Isoform of Q8CH20, Isoform 2 of Cysteine-rich perinuclear theca protein 1 OS=Mus musculus OX=10090 GN=Cypt1\\"\"\"\"\""	Cypt1	2	5	5	18.957	2951800	1691900	1.9e-05	1.74466	2994100	2864900	2996400	1665300	1657000	1753400
A0A140LHH1	small VCP/p97-interacting protein	\\tr|A0A140LHH1|A0A140LHH1_MOUSE Isoform of Q3UZP4, Small VCP/p97-interacting protein OS=Mus musculus OX=10090 GN=Svip PE=4 SV=1\\"\"\"\"\""	Svip	1	3	3	7.0778	2070300	1186900	0.00412817	1.74429	1878100	2316000	2016800	1195500	1051800	1313400
P20060	hexosaminidase B	sp|P20060|HEXB_MOUSE Beta-hexosaminidase subunit beta OS=Mus musculus OX=10090 GN=Hexb PE=1 SV=2	Hexb	1	3	3	61.115	1.0432e+06	598180	0.00350475	1.74396	1049000	939710	1140900	515200	657000	622340
O35450	FK506 binding protein-like	sp|O35450|FKBPL_MOUSE FK506-binding protein-like OS=Mus musculus OX=10090 GN=Fkbpl PE=2 SV=1	Fkbpl	2	11	11	38.301	4.60617e+06	2.64367e+06	0.0012086	1.74234	4474900	4365900	4977700	2356500	2726000	2848500
Q08857	CD36 molecule	sp|Q08857|CD36_MOUSE Platelet glycoprotein 4 OS=Mus musculus OX=10090 GN=Cd36 PE=1 SV=2	Cd36	2	3	3	52.697	897920	515973	0.00121861	1.74024	846410	896790	950560	446620	535590	565710
Q80ZQ0	sperm acrosome associated 4	sp|Q80ZQ0|SACA4_MOUSE Sperm acrosome membrane-associated protein 4 OS=Mus musculus OX=10090 GN=Spaca4 PE=1 SV=1	Spaca4	1	4	4	13.38	1.59457e+07	9.16543e+06	0.000724015	1.73976	16208000	14892000	16737000	8502100	8914200	10080000
Q9DA60	testis expressed 44	sp|Q9DA60|TEX44_MOUSE Testis-expressed protein 44 OS=Mus musculus OX=10090 GN=Tex44 PE=2 SV=2	Tex44	1	8	8	56.574	8433500	4.84767e+06	0.00225261	1.7397	8494800	7659100	9146600	4281100	5085900	5176000
P70277	ST6 (alpha-N-acetyl-neuraminyl-2,3-beta-galactosyl-1,3)-N-acetylgalactosaminide alpha-2,6-sialyltransferase 2	\\sp|P70277|SIA7B_MOUSE Alpha-N-acetylgalactosaminide alpha-2,6-sialyltransferase 2 OS=Mus musculus OX=10090 GN=St6galnac2 PE=1 SV=2\\"\"\"\"\""	St6galnac2	1	11	11	42.481	6.85057e+06	3.94167e+06	0.0015471	1.73799	6657900	6490400	7403400	3436900	4137000	4251100
G5E8R1;G5E8R0;E9Q455;G5E8R2;E9Q453;E9Q456;P58771-2;E9Q452;Q8BSH3;P58771;E9Q454;E9Q450;Q8BP43	tropomyosin 1, alpha	\\tr|G5E8R1|G5E8R1_MOUSE Isoform of P58771, Tropomyosin 1, alpha, isoform CRA_j OS=Mus musculus OX=10090 GN=Tpm1 PE=1 SV=1;tr|G5E8R0|G5E8R0_MOUSE Isoform of P58771, Tropomyosin 1, alpha, isoform CRA_i OS=Mus musculus OX=10090 GN=Tpm1 PE=1 SV=1;tr|E9Q455|E9Q4\\"\"\"\"\""	Tpm1	17	13	3	28.556	2.35853e+06	1358100	0.00149927	1.73664	2339200	2210200	2526200	1212200	1336800	1525300
Q9QXS1-2;Q9QXS1;Q9QXS1-15;Q9QXS1-10;Q9QXS1-9;Q9QXS1-12;Q9QXS1-11;Q9QXS1-13;Q9QXS1-5;Q9QXS1-3;Q9QXS1-16;Q9QXS1-4;Q9QXS1-14;Q9QXS1-6;Q9QXS1-7;Q9QXS1-8;E9Q3W4	plectin	\\sp|Q9QXS1-2|PLEC_MOUSE Isoform of Q9QXS1, Isoform PLEC-1 of Plectin OS=Mus musculus OX=10090 GN=Plec;sp|Q9QXS1|PLEC_MOUSE Plectin OS=Mus musculus OX=10090 GN=Plec PE=1 SV=3;sp|Q9QXS1-15|PLEC_MOUSE Isoform of Q9QXS1, Isoform PLEC-1H of Plectin OS=Mus muscul\\"\"\"\"\""	Plec	22	265	262	533.5	2.35993e+08	1.35893e+08	0.000612218	1.73661	234600000	224430000	248950000	122050000	138490000	147140000
Q8K010;E9Q484	5-oxoprolinase (ATP-hydrolysing)	\\sp|Q8K010|OPLA_MOUSE 5-oxoprolinase OS=Mus musculus OX=10090 GN=Oplah PE=1 SV=1;tr|E9Q484|E9Q484_MOUSE Isoform of Q8K010, 5-oxoprolinase (Fragment) OS=Mus musculus OX=10090 GN=Oplah PE=1 SV=8\\"\"\"\"\""	Oplah	3	36	31	137.61	2.23763e+07	1.28867e+07	0.000585689	1.73639	22458000	21414000	23257000	11461000	12982000	14217000
A2AL85;Q8BSY0;Q8CBM2	aspartate-beta-hydroxylase	\\tr|A2AL85|A2AL85_MOUSE Isoform of Q8BSY0, Aspartyl/asparaginyl beta-hydroxylase OS=Mus musculus OX=10090 GN=Asph PE=1 SV=1;sp|Q8BSY0|ASPH_MOUSE Aspartyl/asparaginyl beta-hydroxylase OS=Mus musculus OX=10090 GN=Asph PE=1 SV=1;tr|Q8CBM2|Q8CBM2_MOUSE Isoform \\"\"\"\"\""	Asph	12	20	20	81.467	6.95527e+06	4006500	0.000235741	1.736	6934400	6721800	7209600	3628700	4184000	4206800
A0A0A6YXM4;S4R1M0;P06800-6;P06800-5;P06800	protein tyrosine phosphatase, receptor type, C	\\tr|A0A0A6YXM4|A0A0A6YXM4_MOUSE Isoform of P06800, Receptor-type tyrosine-protein phosphatase C (Fragment) OS=Mus musculus OX=10090 GN=Ptprc PE=1 SV=1;tr|S4R1M0|S4R1M0_MOUSE Isoform of P06800, Receptor-type tyrosine-protein phosphatase C OS=Mus musculus OX=\\"\"\"\"\""	Ptprc	5	1	1	22.299	197457	113822	0.00279263	1.73476	201790	183580	207000	94097	117010	130360
Q8R4H4;D3Z3T4;E9PYY7	carboxypeptidase A5	\\sp|Q8R4H4|CBPA5_MOUSE Carboxypeptidase A5 OS=Mus musculus OX=10090 GN=Cpa5 PE=2 SV=1;tr|D3Z3T4|D3Z3T4_MOUSE Isoform of Q8R4H4, Carboxypeptidase A5 OS=Mus musculus OX=10090 GN=Cpa5 PE=4 SV=1;tr|E9PYY7|E9PYY7_MOUSE Isoform of Q8R4H4, Carboxypeptidase A5 OS=M\\"\"\"\"\""	Cpa5	3	6	6	49.151	2.74637e+06	1.58397e+06	0.000767404	1.73385	2744100	2609500	2885500	1390700	1704500	1656700
E9QMU3;D3YWN7;O88735;O88735-2	microtubule-associated protein 7	\\tr|E9QMU3|E9QMU3_MOUSE Isoform of O88735, Ensconsin OS=Mus musculus OX=10090 GN=Map7 PE=1 SV=3;tr|D3YWN7|D3YWN7_MOUSE Isoform of O88735, Ensconsin OS=Mus musculus OX=10090 GN=Map7 PE=1 SV=2;sp|O88735|MAP7_MOUSE Ensconsin OS=Mus musculus OX=10090 GN=Map7 PE\\"\"\"\"\""	Map7	7	32	29	81.973	33853000	1.95263e+07	0.00130654	1.73371	33204000	31892000	36463000	17310000	20059000	21210000
O35887;G3UWV3;G3UWR0;G3UY49	calumenin	\\sp|O35887|CALU_MOUSE Calumenin OS=Mus musculus OX=10090 GN=Calu PE=1 SV=1;tr|G3UWV3|G3UWV3_MOUSE Isoform of O35887, Calumenin OS=Mus musculus OX=10090 GN=Calu PE=1 SV=1;tr|G3UWR0|G3UWR0_MOUSE Isoform of O35887, Calumenin OS=Mus musculus OX=10090 GN=Calu PE\\"\"\"\"\""	Calu	7	9	2	37.063	1.34453e+07	7.75803e+06	0.00135865	1.73309	13233000	12567000	14536000	6943300	7975400	8355400
Q921W7;Q3ULB1;P47226-2;P47226	testis derived transcript	\\tr|Q921W7|Q921W7_MOUSE Isoform of P47226, Testin OS=Mus musculus OX=10090 GN=Tes PE=1 SV=2;tr|Q3ULB1|Q3ULB1_MOUSE Isoform of P47226, Testin OS=Mus musculus OX=10090 GN=Tes PE=1 SV=1;sp|P47226-2|TES_MOUSE Isoform of P47226, Isoform TES1 of Testin OS=Mus mus\\"\"\"\"\""	Tes	5	26	19	47.692	5.21903e+07	3.01163e+07	0.000714331	1.73296	51428000	49979000	55164000	26826000	30633000	32890000
A2BI37;G5E8W8;Q62394	zinc finger protein 185	\\tr|A2BI37|A2BI37_MOUSE Isoform of Q62394, Zinc finger protein 185 OS=Mus musculus OX=10090 GN=Zfp185 PE=1 SV=1;tr|G5E8W8|G5E8W8_MOUSE Isoform of Q62394, Zinc finger protein 185 OS=Mus musculus OX=10090 GN=Zfp185 PE=1 SV=1;sp|Q62394|ZN185_MOUSE Zinc finger \\"\"\"\"\""	Zfp185	3	5	5	52.784	1.40233e+06	809337	0.00108031	1.73269	1448300	1271700	1487000	791400	780870	855740
Q9CQ45	neuron derived neurotrophic factor	sp|Q9CQ45|NENF_MOUSE Neudesin OS=Mus musculus OX=10090 GN=Nenf PE=1 SV=1	Nenf	1	6	6	18.904	4.04483e+06	2.33743e+06	0.000225101	1.73046	3985600	3915200	4233700	2196500	2299300	2516500
Q8K183	pyridoxal (pyridoxine, vitamin B6) kinase	sp|Q8K183|PDXK_MOUSE Pyridoxal kinase OS=Mus musculus OX=10090 GN=Pdxk PE=1 SV=1	Pdxk	1	2	2	35.015	672773	389017	0.00097785	1.72942	676000	688130	654190	341850	377160	448040
Q9Z2L6	multiple inositol polyphosphate histidine phosphatase 1	sp|Q9Z2L6|MINP1_MOUSE Multiple inositol polyphosphate phosphatase 1 OS=Mus musculus OX=10090 GN=Minpp1 PE=1 SV=3	Minpp1	1	7	7	54.537	1920400	1.11053e+06	0.00199343	1.72926	1940200	1800000	2021000	1295500	1014900	1021200
Q8C845;Q9D8Y0	EF hand domain containing 2	\\tr|Q8C845|Q8C845_MOUSE Isoform of Q9D8Y0, EF-hand domain-containing protein D2 OS=Mus musculus OX=10090 GN=Efhd2 PE=1 SV=1;sp|Q9D8Y0|EFHD2_MOUSE EF-hand domain-containing protein D2 OS=Mus musculus OX=10090 GN=Efhd2 PE=1 SV=1\\"\"\"\"\""	Efhd2	2	8	7	26.8	6002100	3.47153e+06	0.000482798	1.72895	5906900	5737000	6362400	3170400	3551100	3693100
Q8BG37	peroxiredoxin 6B	tr|Q8BG37|Q8BG37_MOUSE MCG48959 OS=Mus musculus OX=10090 GN=Prdx6b PE=1 SV=1	Prdx6b	1	10	6	24.996	3.49907e+06	2.02433e+06	0.00049257	1.7285	3466200	3331400	3699600	1850900	2050300	2171800
A0A0C3SFZ4;Q9D5U5	pseudouridine 5-phosphatase	\\tr|A0A0C3SFZ4|A0A0C3SFZ4_MOUSE Isoform of Q9D5U5, Haloacid dehalogenase-like hydrolase domain OS=Mus musculus OX=10090 GN=Pudp PE=1 SV=1;sp|Q9D5U5|HDHD1_MOUSE Pseudouridine-5-phosphatase OS=Mus musculus OX=10090 GN=Pudp PE=1 SV=1\\"\"\"\"\""	Pudp	2	4	4	26.201	2.35197e+06	1.36123e+06	0.000392156	1.72782	2304500	2294600	2456800	1214500	1427600	1441600
Q8C5R5	expressed sequence BB014433	tr|Q8C5R5|Q8C5R5_MOUSE Expressed sequence BB014433 OS=Mus musculus OX=10090 GN=BB014433 PE=2 SV=1	BB014433	2	16	16	40.399	1.43603e+07	8.31333e+06	0.000223933	1.72739	14066000	14005000	15010000	7773500	8198500	8968000
P36371	transporter 2, ATP-binding cassette, sub-family B (MDR/TAP)	sp|P36371|TAP2_MOUSE Antigen peptide transporter 2 OS=Mus musculus OX=10090 GN=Tap2 PE=1 SV=1	Tap2	1	4	4	77.444	401460	232410	0.000264916	1.72737	395730	391290	417360	221480	220600	255150
A2AVR2	maestro heat-like repeat family member 7	sp|A2AVR2|MROH7_MOUSE Maestro heat-like repeat-containing protein family member 7 OS=Mus musculus OX=10090 GN=Mroh7 PE=3 SV=1	Mroh7	2	28	28	141.71	1.98183e+07	11479000	0.000554648	1.72649	19584000	18892000	20979000	10456000	11594000	12387000
Q78Y63;Q78Y63-2	phosducin-like 2	\\sp|Q78Y63|PDCL2_MOUSE Phosducin-like protein 2 OS=Mus musculus OX=10090 GN=Pdcl2 PE=1 SV=1;sp|Q78Y63-2|PDCL2_MOUSE Isoform of Q78Y63, Isoform 2 of Phosducin-like protein 2 OS=Mus musculus OX=10090 GN=Pdcl2\\"\"\"\"\""	Pdcl2	2	6	6	27.769	5.70813e+06	3306400	0.00326512	1.72639	5726600	5171100	6226700	2854500	3458100	3606600
Q71RI9-2;Q71RI9;A0A0G2JGE1	kynurenine aminotransferase 3	\\sp|Q71RI9-2|KAT3_MOUSE Isoform of Q71RI9, Isoform 2 of Kynurenine--oxoglutarate transaminase 3 OS=Mus musculus OX=10090 GN=Kyat3;sp|Q71RI9|KAT3_MOUSE Kynurenine--oxoglutarate transaminase 3 OS=Mus musculus OX=10090 GN=Kyat3 PE=1 SV=1;tr|A0A0G2JGE1|A0A0G2JG\\"\"\"\"\""	Kyat3	4	12	12	47.32	4895800	2.83647e+06	0.00203154	1.72602	4910800	4493100	5283500	2487800	2968400	3053200
E9PVC5;E9PVC6;E9Q9E1;Q6NZJ6;A0A0J9YUS5;Q6NZJ6-2	eukaryotic translation initiation factor 4, gamma 1	\\tr|E9PVC5|E9PVC5_MOUSE Isoform of Q6NZJ6, Eukaryotic translation initiation factor 4 gamma 1 OS=Mus musculus OX=10090 GN=Eif4g1 PE=1 SV=1;tr|E9PVC6|E9PVC6_MOUSE Isoform of Q6NZJ6, Eukaryotic translation initiation factor 4 gamma 1 OS=Mus musculus OX=10090 \\"\"\"\"\""	Eif4g1	15	42	36	175.46	2.68183e+07	1.55627e+07	0.000950628	1.72325	26825000	25417000	28213000	13620000	16078000	16990000
D3YX52;P58749	transmembrane 6 superfamily member 1	\\tr|D3YX52|D3YX52_MOUSE Isoform of P58749, Transmembrane 6 superfamily member 1 OS=Mus musculus OX=10090 GN=Tm6sf1 PE=1 SV=1;sp|P58749|TM6S1_MOUSE Transmembrane 6 superfamily member 1 OS=Mus musculus OX=10090 GN=Tm6sf1 PE=2 SV=2\\"\"\"\"\""	Tm6sf1	2	1	1	31.865	72593	42133.3	0.00762042	1.72289	63050	79230	75499	36252	41240	48908
O08553	dihydropyrimidinase-like 2	sp|O08553|DPYL2_MOUSE Dihydropyrimidinase-related protein 2 OS=Mus musculus OX=10090 GN=Dpysl2 PE=1 SV=2	Dpysl2	1	14	9	62.277	2.89473e+06	1.68143e+06	0.000731563	1.72159	2858100	2784900	3041200	1473600	1757100	1813600
Q8QZT2	centriole, cilia and spindle associated protein	\\sp|Q8QZT2|CCSAP_MOUSE Centriole, cilia and spindle-associated protein OS=Mus musculus OX=10090 GN=Ccsap PE=1 SV=1\\"\"\"\"\""	Ccsap	1	10	10	28.378	4.71827e+06	2740900	0.00241301	1.72143	4826900	4246300	5081600	2447400	2823600	2951700
Q3UJK4;E9QA45	GTP binding protein 2	\\sp|Q3UJK4|GTPB2_MOUSE GTP-binding protein 2 OS=Mus musculus OX=10090 GN=Gtpbp2 PE=1 SV=1;tr|E9QA45|E9QA45_MOUSE Isoform of Q3UJK4, GTP-binding protein 2 OS=Mus musculus OX=10090 GN=Gtpbp2 PE=1 SV=1\\"\"\"\"\""	Gtpbp2	5	13	13	65.754	3.76787e+06	2189600	0.00459927	1.7208	4010100	3340300	3953200	1877100	2217000	2474700
P21981	transglutaminase 2, C polypeptide	sp|P21981|TGM2_MOUSE Protein-glutamine gamma-glutamyltransferase 2 OS=Mus musculus OX=10090 GN=Tgm2 PE=1 SV=4	Tgm2	2	13	13	77.06	4546300	2644300	0.00086144	1.71928	4412700	4386500	4839700	2340100	2760400	2832400
Q3ULJ0-2;Q3ULJ0	glycerol-3-phosphate dehydrogenase 1-like	\\sp|Q3ULJ0-2|GPD1L_MOUSE Isoform of Q3ULJ0, Isoform 2 of Glycerol-3-phosphate dehydrogenase 1-like protein OS=Mus musculus OX=10090 GN=Gpd1l;sp|Q3ULJ0|GPD1L_MOUSE Glycerol-3-phosphate dehydrogenase 1-like protein OS=Mus musculus OX=10090 GN=Gpd1l PE=1 SV=2\\"\"\"\"\""	Gpd1l	3	3	3	34.634	399973	232957	0.000315686	1.71694	381260	405590	413070	212250	238430	248190
G3X9K6;Q14BX2	protease, serine 55	\\tr|G3X9K6|G3X9K6_MOUSE Isoform of Q14BX2, MCG15875 OS=Mus musculus OX=10090 GN=Prss55 PE=3 SV=1;sp|Q14BX2|PRS55_MOUSE Serine protease 55 OS=Mus musculus OX=10090 GN=Prss55 PE=2 SV=1\\"\"\"\"\""	Prss55	2	3	3	36.086	1.35147e+06	787930	0.00142538	1.71521	1237100	1435100	1382200	721370	780660	861760
Q7TSG6	radixin	\\tr|Q7TSG6|Q7TSG6_MOUSE Isoform of P26043, Radixin OS=Mus musculus OX=10090 GN=Rdx PE=1 SV=1\\"\"\"\"\""	Rdx	1	24	2	46.367	796117	464320	0.00313651	1.71458	810920	705510	871920	426460	486020	480480
E9PYD9;E9Q543;E9PXL5;P35846;E9PXB5	folate receptor 1 (adult)	\\tr|E9PYD9|E9PYD9_MOUSE Isoform of P35846, Folate receptor alpha (Fragment) OS=Mus musculus OX=10090 GN=Folr1 PE=1 SV=1;tr|E9Q543|E9Q543_MOUSE Isoform of P35846, Folate receptor alpha (Fragment) OS=Mus musculus OX=10090 GN=Folr1 PE=1 SV=8;tr|E9PXL5|E9PXL5_M\\"\"\"\"\""	Folr1	5	2	2	16.004	1.16313e+06	678733	0.00271584	1.71368	1174200	1071100	1244100	572340	724930	738930
A0A0A0MQK8;Q9D0Z3-3;Q9D0Z3;Q9D0Z3-2	transmembrane protein 53	\\tr|A0A0A0MQK8|A0A0A0MQK8_MOUSE Isoform of Q9D0Z3, Transmembrane protein 53 (Fragment) OS=Mus musculus OX=10090 GN=Tmem53 PE=4 SV=1;sp|Q9D0Z3-3|TMM53_MOUSE Isoform of Q9D0Z3, Isoform 3 of Transmembrane protein 53 OS=Mus musculus OX=10090 GN=Tmem53;sp|Q9D0Z3\\"\"\"\"\""	Tmem53	4	8	8	28.759	7.32983e+06	4.27927e+06	0.000532495	1.71287	7330200	7144500	7514800	3729400	4451900	4656500
H3BJ37;Q8BIG7	catechol-O-methyltransferase domain containing 1	\\tr|H3BJ37|H3BJ37_MOUSE Isoform of Q8BIG7, Catechol O-methyltransferase domain-containing protein 1 OS=Mus musculus OX=10090 GN=Comtd1 PE=1 SV=1;sp|Q8BIG7|CMTD1_MOUSE Catechol O-methyltransferase domain-containing protein 1 OS=Mus musculus OX=10090 GN=Comtd\\"\"\"\"\""	Comtd1	2	4	4	22.215	1.38003e+06	806193	0.02423	1.71179	1483400	1103300	1553400	660130	947160	811290
Q6UJB9-2;Q6UJB9	transmembrane protein 270	\\sp|Q6UJB9-2|TM270_MOUSE Isoform of Q6UJB9, Isoform 2 of Transmembrane protein 270 OS=Mus musculus OX=10090 GN=Tmem270;sp|Q6UJB9|TM270_MOUSE Transmembrane protein 270 OS=Mus musculus OX=10090 GN=Tmem270 PE=2 SV=1\\"\"\"\"\""	Tmem270	2	3	3	23.331	2.53473e+06	1.48163e+06	0.000618194	1.71077	2544900	2422600	2636700	1305400	1580700	1558800
Q8VE91;Q8VE91-3;Q8VE91-2;Q8VE91-1;A0A2I3BQZ7	reticulophagy regulator 1	\\sp|Q8VE91|RETR1_MOUSE Reticulophagy regulator 1 OS=Mus musculus OX=10090 GN=Retreg1 PE=1 SV=2;sp|Q8VE91-3|RETR1_MOUSE Isoform of Q8VE91, Isoform 3 of Reticulophagy regulator 1 OS=Mus musculus OX=10090 GN=Retreg1;sp|Q8VE91-2|RETR1_MOUSE Isoform of Q8VE91, I\\"\"\"\"\""	Retreg1	5	6	6	52.966	2.59373e+06	1.51723e+06	0.000882874	1.70951	2497100	2568200	2715900	1355600	1489000	1707100
Q3V0P1	CPX chromosome region, candidate 1	sp|Q3V0P1|CPXCR_MOUSE CPX chromosomal region candidate gene 1 protein homolog OS=Mus musculus OX=10090 GN=Cpxcr1 PE=2 SV=2	Cpxcr1	1	1	1	37.706	223460	130843	0.000302499	1.70783	226650	232740	210990	124270	128760	139500
A2RSQ1;A0A1B0GSK9;A2RSQ1-2;F8WIH9	galactosidase, beta 1 like 3	\\sp|A2RSQ1|GLBL3_MOUSE Beta-galactosidase-1-like protein 3 OS=Mus musculus OX=10090 GN=Glb1l3 PE=1 SV=1;tr|A0A1B0GSK9|A0A1B0GSK9_MOUSE Isoform of A2RSQ1, Beta-galactosidase OS=Mus musculus OX=10090 GN=Glb1l3 PE=1 SV=1;sp|A2RSQ1-2|GLBL3_MOUSE Isoform of A2RS\\"\"\"\"\""	Glb1l3	5	9	9	73.921	7922200	4640800	0.000745834	1.70708	7441600	8150700	8174300	4398200	4366500	5157700
Q9EP52	twisted gastrulation BMP signaling modulator 1	sp|Q9EP52|TWSG1_MOUSE Twisted gastrulation protein homolog 1 OS=Mus musculus OX=10090 GN=Twsg1 PE=1 SV=1	Twsg1	1	2	2	24.8	772353	452483	0.00451582	1.70692	735310	773610	808140	349830	498210	509410
Q9R1P1	proteasome (prosome, macropain) subunit, beta type 3	sp|Q9R1P1|PSB3_MOUSE Proteasome subunit beta type-3 OS=Mus musculus OX=10090 GN=Psmb3 PE=1 SV=1	Psmb3	2	8	8	22.965	8.01333e+06	4696200	0.00164221	1.70634	7965500	7447800	8626700	4190300	4757500	5140800
A0A0G2JG59	nexilin	\\tr|A0A0G2JG59|A0A0G2JG59_MOUSE Isoform of Q7TPW1, Nexilin (Fragment) OS=Mus musculus OX=10090 GN=Nexn PE=1 SV=1\\"\"\"\"\""	Nexn	1	16	0	56.496	200640	117627	0.0121149	1.70572	182850	236020	183050	109340	111770	131770
Q8CGF5;Q8CGF5-2;D3Z3E6	transmembrane protein 56	\\sp|Q8CGF5|TMM56_MOUSE Transmembrane protein 56 OS=Mus musculus OX=10090 GN=Tmem56 PE=2 SV=1;sp|Q8CGF5-2|TMM56_MOUSE Isoform of Q8CGF5, Isoform 2 of Transmembrane protein 56 OS=Mus musculus OX=10090 GN=Tmem56;tr|D3Z3E6|D3Z3E6_MOUSE Isoform of Q8CGF5, Transm\\"\"\"\"\""	Tmem56	3	8	8	31.235	8394200	4924000	0.00198914	1.70475	8404500	7748800	9029300	4368400	4959800	5443800
P56371	RAB4A, member RAS oncogene family	sp|P56371|RAB4A_MOUSE Ras-related protein Rab-4A OS=Mus musculus OX=10090 GN=Rab4a PE=1 SV=2	Rab4a	1	4	2	24.408	389773	228753	0.000533342	1.70389	394150	388130	387040	198330	237020	250910
Q8R4U1;Q8R4U1-2	Myb-related transcription factor, partner of profilin	\\sp|Q8R4U1|MYPOP_MOUSE Myb-related transcription factor, partner of profilin OS=Mus musculus OX=10090 GN=Mypop PE=1 SV=1;sp|Q8R4U1-2|MYPOP_MOUSE Isoform of Q8R4U1, Isoform 2 of Myb-related transcription factor, partner of profilin OS=Mus musculus OX=10090 G\\"\"\"\"\""	Mypop	2	2	2	41.89	7.42037e+06	4.35947e+06	0.00173991	1.70213	7523100	6942100	7795900	3711200	4639300	4727900
Q61391	membrane metallo endopeptidase	sp|Q61391|NEP_MOUSE Neprilysin OS=Mus musculus OX=10090 GN=Mme PE=1 SV=3	Mme	4	8	8	85.701	1.43883e+06	846087	0.000339735	1.70057	1442800	1388200	1485500	762890	863910	911460
A0A087WRQ0	centrosome and spindle pole associated protein 1	\\tr|A0A087WRQ0|A0A087WRQ0_MOUSE Isoform of B2RX88, Centrosome and spindle pole-associated protein 1 (Fragment) OS=Mus musculus OX=10090 GN=Cspp1 PE=1 SV=1\\"\"\"\"\""	Cspp1	1	4	1	11.343	258173	151920	0.000426013	1.69939	242000	257280	275240	148920	150250	156590
Q9CQ94	DnaJ heat shock protein family (Hsp40) member C5 beta	sp|Q9CQ94|DNJ5B_MOUSE DnaJ homolog subfamily C member 5B OS=Mus musculus OX=10090 GN=Dnajc5b PE=1 SV=1	Dnajc5b	1	6	6	22.661	4.51617e+06	2658300	0.00058203	1.69889	4541600	4320400	4686500	2461900	2550300	2962700
Q3ULD5;Q6PD20	methylcrotonoyl-Coenzyme A carboxylase 2 (beta)	\\sp|Q3ULD5|MCCB_MOUSE Methylcrotonoyl-CoA carboxylase beta chain, mitochondrial OS=Mus musculus OX=10090 GN=Mccc2 PE=1 SV=1;tr|Q6PD20|Q6PD20_MOUSE Isoform of Q3ULD5, Mccc2 protein (Fragment) OS=Mus musculus OX=10090 GN=Mccc2 PE=1 SV=1\\"\"\"\"\""	Mccc2	2	19	19	61.378	7327300	4.31333e+06	0.000364651	1.69876	6981000	7528400	7472500	4027000	4199800	4713200
Q9D3X9;Q9D3X9-2	microfibrillar-associated protein 3-like	\\sp|Q9D3X9|MFA3L_MOUSE Microfibrillar-associated protein 3-like OS=Mus musculus OX=10090 GN=Mfap3l PE=1 SV=1;sp|Q9D3X9-2|MFA3L_MOUSE Isoform of Q9D3X9, Isoform 2 of Microfibrillar-associated protein 3-like OS=Mus musculus OX=10090 GN=Mfap3l\\"\"\"\"\""	Mfap3l	4	7	7	45.341	1991700	1.17257e+06	0.000322717	1.69858	2007400	1883900	2083800	1114300	1152600	1250800
Q91XV3	brain abundant, membrane attached signal protein 1	sp|Q91XV3|BASP1_MOUSE Brain acid soluble protein 1 OS=Mus musculus OX=10090 GN=Basp1 PE=1 SV=3	Basp1	1	14	14	22.086	2.07073e+07	1.21957e+07	0.00103329	1.69793	20874000	19307000	21941000	10993000	12420000	13174000
P03911	mitochondrially encoded NADH dehydrogenase 4DH dehydrogenase subunit 4	sp|P03911|NU4M_MOUSE NADH-ubiquinone oxidoreductase chain 4 OS=Mus musculus OX=10090 GN=Mtnd4 PE=1 SV=1	mt-Nd4;ND4	1	3	3	51.881	1.58767e+06	935657	0.00510912	1.69685	1660700	1396600	1705700	820000	1050700	936270
P23242	gap junction protein, alpha 1	sp|P23242|CXA1_MOUSE Gap junction alpha-1 protein OS=Mus musculus OX=10090 GN=Gja1 PE=1 SV=2	Gja1	3	5	5	43.004	3021200	1780600	0.000647394	1.69673	2907400	3125200	3031000	1654100	1683400	2004300
P21107-2;D3Z2H9	tropomyosin 3, gamma	\\sp|P21107-2|TPM3_MOUSE Isoform of P21107, Isoform 2 of Tropomyosin alpha-3 chain OS=Mus musculus OX=10090 GN=Tpm3;tr|D3Z2H9|D3Z2H9_MOUSE Uncharacterized protein OS=Mus musculus OX=10090 GN=Tpm3-rs7 PE=3 SV=1\\"\"\"\"\""	Tpm3	2	34	0	29.02	52930000	3.12037e+07	0.001658	1.69627	51346000	50345000	57099000	27505000	31883000	34223000
O08716;A0A0A6YXI2;A0A0A6YW05;A0A0A6YXB9	fatty acid binding protein 9, testis	\\sp|O08716|FABP9_MOUSE Fatty acid-binding protein 9 OS=Mus musculus OX=10090 GN=Fabp9 PE=1 SV=2;tr|A0A0A6YXI2|A0A0A6YXI2_MOUSE Isoform of O08716, Fatty acid binding protein 9, testis OS=Mus musculus OX=10090 GN=Fabp9 PE=1 SV=1;tr|A0A0A6YW05|A0A0A6YW05_MOUSE\\"\"\"\"\""	Fabp9	5	9	8	15.017	41412000	24415000	0.000439667	1.69617	39718000	42171000	42347000	22093000	24379000	26773000
Q9Z0R9	fatty acid desaturase 2	sp|Q9Z0R9|FADS2_MOUSE Fatty acid desaturase 2 OS=Mus musculus OX=10090 GN=Fads2 PE=1 SV=1	Fads2	1	8	8	52.387	3495100	2062500	0.000584272	1.69459	3433300	3393700	3658300	1830700	2132000	2224800
Q06890;E9PUU2;E9PXG5;E9Q8Y5	clusterin	\\sp|Q06890|CLUS_MOUSE Clusterin OS=Mus musculus OX=10090 GN=Clu PE=1 SV=1;tr|E9PUU2|E9PUU2_MOUSE Isoform of Q06890, Clusterin (Fragment) OS=Mus musculus OX=10090 GN=Clu PE=1 SV=1;tr|E9PXG5|E9PXG5_MOUSE Isoform of Q06890, Clusterin (Fragment) OS=Mus musculus\\"\"\"\"\""	Clu	6	13	13	51.655	2.19947e+07	1.29963e+07	0.00135146	1.69237	21565000	20655000	23764000	11812000	13109000	14068000
Q8VE42	ankyrin repeat domain 49	sp|Q8VE42|ANR49_MOUSE Ankyrin repeat domain-containing protein 49 OS=Mus musculus OX=10090 GN=Ankrd49 PE=1 SV=1	Ankrd49	2	3	3	27.111	686933	406410	0.00119737	1.69024	646750	680750	733300	376420	391020	451790
Q8CGQ2	a disintegrin and metallopeptidase domain 4	tr|Q8CGQ2|Q8CGQ2_MOUSE A disintegrin and metallopeptidase domain 4 OS=Mus musculus OX=10090 GN=Adam4 PE=2 SV=1	Adam4	1	25	16	84.406	3.03103e+07	17933000	0.0015388	1.6902	29302000	28976000	32653000	15744000	18835000	19220000
Q6P8X3;Q9D9T6	spermatogenesis associated 3	\\tr|Q6P8X3|Q6P8X3_MOUSE Isoform of Q9D9T6, Spermatogenesis associated 3 OS=Mus musculus OX=10090 GN=Spata3 PE=2 SV=1;sp|Q9D9T6|SPTA3_MOUSE Spermatogenesis-associated protein 3 OS=Mus musculus OX=10090 GN=Spata3 PE=2 SV=2\\"\"\"\"\""	Spata3	2	5	1	18.923	2571800	1522200	0.0194063	1.68953	2222500	3083800	2409100	1350500	1547500	1668600
A0A0R4J2A7;Q3UHI0-2;A0A286YEB1	coiled-coil serine rich 2	\\tr|A0A0R4J2A7|A0A0R4J2A7_MOUSE Isoform of Q3UHI0, Granule cell antiserum positive 14, isoform CRA_a OS=Mus musculus OX=10090 GN=Ccser2 PE=1 SV=1;sp|Q3UHI0-2|CCSE2_MOUSE Isoform of Q3UHI0, Isoform 2 of Serine-rich coiled-coil domain-containing protein 2 OS=\\"\"\"\"\""	Ccser2	7	12	12	54.431	7.03543e+06	4.16467e+06	0.001363	1.68931	7058700	6588000	7459600	3680100	4246200	4567700
Q9DAA4	protease, serine 37	sp|Q9DAA4|PRS37_MOUSE Probable inactive serine protease 37 OS=Mus musculus OX=10090 GN=Prss37 PE=1 SV=1	Prss37	1	11	11	26.698	54486000	3.22677e+07	0.00131566	1.68856	53454000	51956000	58048000	28721000	32156000	35926000
P28665;P28666	murinoglobulin 1	sp|P28665|MUG1_MOUSE Murinoglobulin-1 OS=Mus musculus OX=10090 GN=Mug1 PE=1 SV=3;sp|P28666|MUG2_MOUSE Murinoglobulin-2 OS=Mus musculus OX=10090 GN=Mug2 PE=1 SV=2	Mug1	3	5	4	165.3	275803	163547	0.000504248	1.68638	265540	267070	294800	173520	161970	155150
E0CXZ5	SAM domain and HD domain, 1	\\tr|E0CXZ5|E0CXZ5_MOUSE Isoform of Q60710, Deoxynucleoside triphosphate triphosphohydrolase SAMHD1 OS=Mus musculus OX=10090 GN=Samhd1 PE=1 SV=1\\"\"\"\"\""	Samhd1	1	1	1	16.625	108121	64118.7	0.00636706	1.68624	109960	96333	118070	53378	71695	67283
Q6IRU7	centrosomal protein 78	sp|Q6IRU7|CEP78_MOUSE Centrosomal protein of 78 kDa OS=Mus musculus OX=10090 GN=Cep78 PE=2 SV=1	Cep78	1	1	1	86.889	188330	111717	0.0186258	1.68577	194150	152620	218220	100250	116520	118380
Q8R502	leucine rich repeat containing 8 family, member C	sp|Q8R502|LRC8C_MOUSE Volume-regulated anion channel subunit LRRC8C OS=Mus musculus OX=10090 GN=Lrrc8c PE=1 SV=1	Lrrc8c	1	4	3	92.371	700137	415507	0.000893119	1.68502	728350	661830	710230	365190	443680	437650
A2CF65;P49300;F8WHB7;J3QPR7	C-type lectin domain family 10, member A	\\tr|A2CF65|A2CF65_MOUSE Isoform of P49300, C-type lectin domain family 10 member A (Fragment) OS=Mus musculus OX=10090 GN=Clec10a PE=1 SV=1;sp|P49300|CLC10_MOUSE C-type lectin domain family 10 member A OS=Mus musculus OX=10090 GN=Clec10a PE=1 SV=1;tr|F8WHB7\\"\"\"\"\""	Clec10a	7	5	2	24.516	206033	122286	0.0183932	1.68483	207390	208480	202230	96088	165350	105420
P05214	tubulin, alpha 3A;tubulin, alpha 3B	sp|P05214|TBA3_MOUSE Tubulin alpha-3 chain OS=Mus musculus OX=10090 GN=Tuba3a PE=1 SV=1	Tuba3a;Tuba3b	4	22	2	49.959	1.99933e+08	1.18677e+08	0.000426688	1.68469	191180000	202180000	206440000	108650000	117820000	129560000
O35350	calpain 1	sp|O35350|CAN1_MOUSE Calpain-1 catalytic subunit OS=Mus musculus OX=10090 GN=Capn1 PE=1 SV=1	Capn1	1	2	2	82.105	307933	183123	0.000516204	1.68155	307630	299130	317040	164640	181840	202890
Q99PL6	UBX domain protein 6	sp|Q99PL6|UBXN6_MOUSE UBX domain-containing protein 6 OS=Mus musculus OX=10090 GN=Ubxn6 PE=1 SV=1	Ubxn6	1	17	3	49.795	8179200	4.86527e+06	0.00189678	1.68114	8491600	7469300	8576700	4300000	5203500	5092300
Q9D9B0	coiled-coil domain containing 70	sp|Q9D9B0|CCD70_MOUSE Coiled-coil domain-containing protein 70 OS=Mus musculus OX=10090 GN=Ccdc70 PE=2 SV=1	Ccdc70	1	3	3	27.598	1.55203e+06	923660	0.00154521	1.68031	1497700	1479800	1678600	840740	911940	1018300
B1AST8;Q60592;B1AST7;E9QLW6;E9Q1Q1	microtubule associated serine/threonine kinase 2	\\tr|B1AST8|B1AST8_MOUSE Isoform of Q60592, Microtubule associated serine/threonine kinase 2, isoform CRA_b OS=Mus musculus OX=10090 GN=Mast2 PE=1 SV=1;sp|Q60592|MAST2_MOUSE Microtubule-associated serine/threonine-protein kinase 2 OS=Mus musculus OX=10090 GN\\"\"\"\"\""	Mast2	5	4	3	190.36	839337	499650	0.00198281	1.67985	807680	817350	892980	423570	524500	550880
Q99KC8	von Willebrand factor A domain containing 5A	sp|Q99KC8|VMA5A_MOUSE von Willebrand factor A domain-containing protein 5A OS=Mus musculus OX=10090 GN=Vwa5a PE=1 SV=2	Vwa5a	4	6	6	87.142	522483	311130	0.000758527	1.6793	526920	507940	532590	275300	308170	349920
A0A0R4J0G6;Q9CYK2;Q9CYK2-2	glutaminyl-peptide cyclotransferase (glutaminyl cyclase)	\\tr|A0A0R4J0G6|A0A0R4J0G6_MOUSE Isoform of Q9CYK2, Glutaminyl-peptide cyclotransferase OS=Mus musculus OX=10090 GN=Qpct PE=1 SV=1;sp|Q9CYK2|QPCT_MOUSE Glutaminyl-peptide cyclotransferase OS=Mus musculus OX=10090 GN=Qpct PE=1 SV=2;sp|Q9CYK2-2|QPCT_MOUSE Isof\\"\"\"\"\""	Qpct	3	3	3	41.075	1.24613e+06	742487	0.0060983	1.67832	1284800	1091900	1361700	647630	757500	822330
A0A1L1SV59;Q9D925	lysozyme-like 4	\\tr|A0A1L1SV59|A0A1L1SV59_MOUSE Isoform of Q9D925, Lysozyme-like protein 4 (Fragment) OS=Mus musculus OX=10090 GN=Lyzl4 PE=1 SV=1;sp|Q9D925|LYZL4_MOUSE Lysozyme-like protein 4 OS=Mus musculus OX=10090 GN=Lyzl4 PE=1 SV=3\\"\"\"\"\""	Lyzl4	4	5	5	15.395	9.24873e+06	5511000	0.000881771	1.67823	8650900	9333100	9762200	5109200	5404900	6018900
Q99J31	oligophrenin 1	sp|Q99J31|OPHN1_MOUSE Oligophrenin-1 OS=Mus musculus OX=10090 GN=Ophn1 PE=1 SV=1	Ophn1	1	4	4	91.984	447097	266773	0.00132091	1.67594	431110	472230	437950	244820	251760	303740
Q80VP2;Q3TTL3;Q3U5D0	spermatogenesis associated 7	\\sp|Q80VP2|SPAT7_MOUSE Spermatogenesis-associated protein 7 homolog OS=Mus musculus OX=10090 GN=Spata7 PE=1 SV=1;tr|Q3TTL3|Q3TTL3_MOUSE Isoform of Q80VP2, SPATA7 isoform OS=Mus musculus OX=10090 GN=Spata7 PE=2 SV=1;tr|Q3U5D0|Q3U5D0_MOUSE Isoform of Q80VP2, \\"\"\"\"\""	Spata7	3	18	18	65.654	9.31983e+06	5562300	0.00013093	1.67554	9083600	9194000	9681900	5214700	5641200	5831000
F7D3N3;Q8BGT8;F6U6Z2;Q8BGT8-2	phytanoyl-CoA hydroxylase interacting protein-like	\\tr|F7D3N3|F7D3N3_MOUSE Isoform of Q8BGT8, Phytanoyl-CoA hydroxylase-interacting protein-like OS=Mus musculus OX=10090 GN=Phyhipl PE=1 SV=1;sp|Q8BGT8|PHIPL_MOUSE Phytanoyl-CoA hydroxylase-interacting protein-like OS=Mus musculus OX=10090 GN=Phyhipl PE=1 SV=\\"\"\"\"\""	Phyhipl	7	16	16	37.474	8692700	5.18813e+06	0.0019478	1.6755	8515400	8304500	9258200	4445700	5355100	5763600
H3BKG0;P49817;D3Z148	caveolin 1, caveolae protein	\\tr|H3BKG0|H3BKG0_MOUSE Isoform of P49817, Caveolin-1 OS=Mus musculus OX=10090 GN=Cav1 PE=1 SV=1;sp|P49817|CAV1_MOUSE Caveolin-1 OS=Mus musculus OX=10090 GN=Cav1 PE=1 SV=1;tr|D3Z148|D3Z148_MOUSE Isoform of P49817, Caveolin (Fragment) OS=Mus musculus OX=1009\\"\"\"\"\""	Cav1	3	5	3	10.391	5.07197e+06	3031700	0.00135196	1.67298	5007600	4828700	5379600	2636100	3260100	3198900
E9QNC6;Q69ZB0-2;G5E8Y2;Q69ZB0;B9EI20;Q69ZB0-3;F7ANC5;E9Q8Q7	leucine rich repeat and coiled-coil domain containing 1	\\tr|E9QNC6|E9QNC6_MOUSE Isoform of Q69ZB0, Leucine-rich repeat and coiled-coil domain-containing protein 1 OS=Mus musculus OX=10090 GN=Lrrcc1 PE=1 SV=1;sp|Q69ZB0-2|LRCC1_MOUSE Isoform of Q69ZB0, Isoform 2 of Leucine-rich repeat and coiled-coil domain-contai\\"\"\"\"\""	Lrrcc1	11	35	35	117.28	1.90047e+07	1.13667e+07	0.000129914	1.67196	19021000	18693000	19300000	10531000	11325000	12244000
B2RUM3	expressed sequence AU015836	tr|B2RUM3|B2RUM3_MOUSE AU015836 protein OS=Mus musculus OX=10090 GN=AU015836 PE=1 SV=1	AU015836	1	5	5	30.529	3769800	2.25583e+06	0.00850197	1.67113	3667000	3333800	4308600	2003300	2334700	2429500
Q5EBG8	expressed sequence AU022252	sp|Q5EBG8|CA050_MOUSE Uncharacterized protein C1orf50 homolog OS=Mus musculus OX=10090 PE=1 SV=1	AU022252	1	2	2	21.862	344827	206533	0.00181844	1.66959	332860	323220	378400	191400	209660	218540
A6ZI47	aldolase 1 A, retrogene 2	tr|A6ZI47|A6ZI47_MOUSE Fructose-bisphosphate aldolase OS=Mus musculus OX=10090 GN=Aldoart2 PE=1 SV=1	Aldoart2	1	28	15	39.37	4.64133e+07	2.77997e+07	0.00159097	1.66956	45748000	43492000	50000000	24804000	28806000	29789000
Q02053	ubiquitin-like modifier activating enzyme 1	sp|Q02053|UBA1_MOUSE Ubiquitin-like modifier-activating enzyme 1 OS=Mus musculus OX=10090 GN=Uba1 PE=1 SV=1	Uba1	1	27	20	117.81	31131000	1.86523e+07	0.000850628	1.66901	30795000	29523000	33075000	16862000	19162000	19933000
Q9JJC9	HERPUD family member 2	sp|Q9JJC9|HERP2_MOUSE Homocysteine-responsive endoplasmic reticulum-resident ubiquitin-like domain member 2 protein OS=Mus musculus OX=10090 GN=Herpud2 PE=2 SV=1	Herpud2	1	1	1	44.501	587460	352067	0.0021131	1.6686	590670	539730	631980	312590	367050	376560
Q8C5U9	ubiquilin 3	sp|Q8C5U9|UBQL3_MOUSE Ubiquilin-3 OS=Mus musculus OX=10090 GN=Ubqln3 PE=1 SV=1	Ubqln3	1	12	12	70.752	9400400	5.63433e+06	0.00263403	1.66841	9369700	8829500	10002000	4772600	5827000	6303400
Q3U492;E9QNB3;Q3U492-2	kielin/chordin-like protein	\\sp|Q3U492|KCP_MOUSE Kielin/chordin-like protein OS=Mus musculus OX=10090 GN=Kcp PE=1 SV=2;tr|E9QNB3|E9QNB3_MOUSE Isoform of Q3U492, Kielin/chordin-like protein OS=Mus musculus OX=10090 GN=Kcp PE=1 SV=1;sp|Q3U492-2|KCP_MOUSE Isoform of Q3U492, Isoform 2 of \\"\"\"\"\""	Kcp	6	17	17	166.63	4.61877e+06	2.77007e+06	0.000753194	1.66738	4513000	4520700	4822600	2465300	2786500	3058400
Q6PHZ2-2;E9Q1V9;Q6PHZ2-4;Q6PHZ2;E9Q1W0;Q6PHZ2-5;E9Q1T1;A0A0G2JGS4;Q8CCM0	calcium/calmodulin-dependent protein kinase II, delta	\\sp|Q6PHZ2-2|KCC2D_MOUSE Isoform of Q6PHZ2, Isoform 2 of Calcium/calmodulin-dependent protein kinase type II subunit delta OS=Mus musculus OX=10090 GN=Camk2d;tr|E9Q1V9|E9Q1V9_MOUSE Isoform of Q6PHZ2, Calcium/calmodulin-dependent protein kinase type II subun\\"\"\"\"\""	Camk2d	25	8	6	54.113	1053880	632083	0.000760307	1.66731	1059100	979740	1122800	594970	642170	659110
P17047-3;P17047;P17047-2	lysosomal-associated membrane protein 2	\\sp|P17047-3|LAMP2_MOUSE Isoform of P17047, Isoform LAMP-2C of Lysosome-associated membrane glycoprotein 2 OS=Mus musculus OX=10090 GN=Lamp2;sp|P17047|LAMP2_MOUSE Lysosome-associated membrane glycoprotein 2 OS=Mus musculus OX=10090 GN=Lamp2 PE=1 SV=2;sp|P17\\"\"\"\"\""	Lamp2	3	8	8	45.655	1.16393e+07	6.98173e+06	0.00211881	1.66711	11525000	10846000	12547000	6140400	7201800	7603000
Q9D8N0	eukaryotic translation elongation factor 1 gamma	sp|Q9D8N0|EF1G_MOUSE Elongation factor 1-gamma OS=Mus musculus OX=10090 GN=Eef1g PE=1 SV=3	Eef1g	1	24	24	50.06	2.00883e+08	1.20583e+08	0.00178034	1.66593	199070000	188350000	215230000	105830000	125300000	130620000
Q8JZL3	thiamine triphosphatase	sp|Q8JZL3|THTPA_MOUSE Thiamine-triphosphatase OS=Mus musculus OX=10090 GN=Thtpa PE=1 SV=3	Thtpa	1	2	2	24.264	189860	114007	0.00469401	1.66532	170960	200710	197910	123480	95311	123230
Q8BHB7	RIKEN cDNA 1700030J22 gene	sp|Q8BHB7|CP046_MOUSE Uncharacterized protein C16orf46 homolog OS=Mus musculus OX=10090 PE=2 SV=1	1700030J22Rik	1	6	6	45.038	2.15793e+06	1.29657e+06	0.00052897	1.66434	2140700	2074500	2258600	1179600	1303900	1406200
Q8CFV9	riboflavin kinase	sp|Q8CFV9|RIFK_MOUSE Riboflavin kinase OS=Mus musculus OX=10090 GN=Rfk PE=1 SV=2	Rfk	1	1	1	17.437	443700	266797	0.000515564	1.66306	459440	415100	456560	251800	263630	284960
Q61333;D3Z4L9	tumor necrosis factor, alpha-induced protein 2	\\sp|Q61333|TNAP2_MOUSE Tumor necrosis factor alpha-induced protein 2 OS=Mus musculus OX=10090 GN=Tnfaip2 PE=1 SV=2;tr|D3Z4L9|D3Z4L9_MOUSE Isoform of Q61333, Tumor necrosis factor alpha-induced protein 2 OS=Mus musculus OX=10090 GN=Tnfaip2 PE=1 SV=2\\"\"\"\"\""	Tnfaip2	5	3	3	78.101	149107	89696	0.00422879	1.66234	152810	133160	161350	78585	92672	97831
E9QP49;Q99MS7;Q99MS7-4;Q99MS7-5;G5E8Y6;Q99MS7-3;Q99MS7-2	EH domain binding protein 1-like 1	\\tr|E9QP49|E9QP49_MOUSE Isoform of Q99MS7, EH domain-binding protein 1-like protein 1 OS=Mus musculus OX=10090 GN=Ehbp1l1 PE=1 SV=1;sp|Q99MS7|EH1L1_MOUSE EH domain-binding protein 1-like protein 1 OS=Mus musculus OX=10090 GN=Ehbp1l1 PE=1 SV=1;sp|Q99MS7-4|EH\\"\"\"\"\""	Ehbp1l1	7	12	12	184.8	3.27203e+06	1.96853e+06	0.00229287	1.66217	3388000	3009200	3418900	1705300	2049800	2150500
Q9ERZ0	hemogen	sp|Q9ERZ0|HEMGN_MOUSE Hemogen OS=Mus musculus OX=10090 GN=Hemgn PE=1 SV=1	Hemgn	1	16	16	55.042	2.92727e+07	1.76227e+07	0.0010915	1.66108	28539000	28349000	30930000	15801000	17442000	19625000
Q9CQM9;A0A1B0GS58	glutaredoxin 3	\\sp|Q9CQM9|GLRX3_MOUSE Glutaredoxin-3 OS=Mus musculus OX=10090 GN=Glrx3 PE=1 SV=1;tr|A0A1B0GS58|A0A1B0GS58_MOUSE Isoform of Q9CQM9, Glutaredoxin-3 OS=Mus musculus OX=10090 GN=Glrx3 PE=1 SV=1\\"\"\"\"\""	Glrx3	4	15	15	37.778	18959000	1.14226e+07	0.00170621	1.65978	19069000	17747000	20061000	9940700	11942000	12385000
Q6P9J9;A0A2I3BPX3;A0A2I3BPY8	anoctamin 6	\\sp|Q6P9J9|ANO6_MOUSE Anoctamin-6 OS=Mus musculus OX=10090 GN=Ano6 PE=1 SV=1;tr|A0A2I3BPX3|A0A2I3BPX3_MOUSE Isoform of Q6P9J9, Anoctamin OS=Mus musculus OX=10090 GN=Ano6 PE=1 SV=1;tr|A0A2I3BPY8|A0A2I3BPY8_MOUSE Isoform of Q6P9J9, Anoctamin OS=Mus musculus O\\"\"\"\"\""	Ano6	5	3	3	106.25	152143	91698	0.00763254	1.65916	148720	137070	170640	77995	95119	101980
Q61598-2;Q61598;A0A1Y7VL99	guanosine diphosphate (GDP) dissociation inhibitor 2	\\sp|Q61598-2|GDIB_MOUSE Isoform of Q61598, Isoform 2 of Rab GDP dissociation inhibitor beta OS=Mus musculus OX=10090 GN=Gdi2;sp|Q61598|GDIB_MOUSE Rab GDP dissociation inhibitor beta OS=Mus musculus OX=10090 GN=Gdi2 PE=1 SV=1;tr|A0A1Y7VL99|A0A1Y7VL99_MOUSE I\\"\"\"\"\""	Gdi2	4	17	13	46.657	1.34427e+07	8.10507e+06	0.0003486	1.65855	13525000	12799000	14004000	7527500	8169900	8617800
Q99J99	mercaptopyruvate sulfurtransferase	sp|Q99J99|THTM_MOUSE 3-mercaptopyruvate sulfurtransferase OS=Mus musculus OX=10090 GN=Mpst PE=1 SV=4	Mpst	2	5	5	33.097	2358300	1422800	0.000289399	1.65751	2286900	2423800	2364200	1314400	1405300	1548700
Q9R1P0	proteasome (prosome, macropain) subunit, alpha type 4	sp|Q9R1P0|PSA4_MOUSE Proteasome subunit alpha type-4 OS=Mus musculus OX=10090 GN=Psma4 PE=1 SV=1	Psma4	3	14	14	29.47	37472000	22609000	0.00113944	1.65739	37328000	35273000	39815000	20380000	22904000	24543000
Q8R1G1;Q8R1G1-2;Q3UJT0	taspase, threonine aspartase 1	\\sp|Q8R1G1|TASP1_MOUSE Threonine aspartase 1 OS=Mus musculus OX=10090 GN=Tasp1 PE=2 SV=1;sp|Q8R1G1-2|TASP1_MOUSE Isoform of Q8R1G1, Isoform 2 of Threonine aspartase 1 OS=Mus musculus OX=10090 GN=Tasp1;tr|Q3UJT0|Q3UJT0_MOUSE Isoform of Q8R1G1, Threonine aspa\\"\"\"\"\""	Tasp1	3	10	10	44.36	7491500	4.52277e+06	0.00251965	1.6564	7568600	6869700	8036200	3962200	4771300	4834800
Q920L1	fatty acid desaturase 1	sp|Q920L1|FADS1_MOUSE Fatty acid desaturase 1 OS=Mus musculus OX=10090 GN=Fads1 PE=1 SV=1	Fads1	1	5	5	52.322	846667	511237	0.000740181	1.65611	858580	836770	844650	475230	476340	582140
Q14B02;Q14B02-2	ring finger protein 133	\\sp|Q14B02|RN133_MOUSE E3 ubiquitin-protein ligase RNF133 OS=Mus musculus OX=10090 GN=Rnf133 PE=1 SV=1;sp|Q14B02-2|RN133_MOUSE Isoform of Q14B02, Isoform 2 of E3 ubiquitin-protein ligase RNF133 OS=Mus musculus OX=10090 GN=Rnf133\\"\"\"\"\""	Rnf133	2	8	8	43.101	9.48693e+06	5.73457e+06	0.000844099	1.65434	9335900	9135800	9989100	5212900	5651400	6339400
Q64521;A2AQR0	glycerol phosphate dehydrogenase 2, mitochondrial	\\sp|Q64521|GPDM_MOUSE Glycerol-3-phosphate dehydrogenase, mitochondrial OS=Mus musculus OX=10090 GN=Gpd2 PE=1 SV=2;tr|A2AQR0|A2AQR0_MOUSE Isoform of Q64521, Glycerol-3-phosphate dehydrogenase OS=Mus musculus OX=10090 GN=Gpd2 PE=1 SV=1\\"\"\"\"\""	Gpd2	2	47	47	80.953	119930000	7.25087e+07	0.000457723	1.65401	116980000	117090000	125720000	66403000	72808000	78315000
Q497P9	predicted gene 5941	tr|Q497P9|Q497P9_MOUSE MCG112829 OS=Mus musculus OX=10090 GN=Gm5941 PE=2 SV=1	Gm5941	1	4	4	13.247	5.66143e+06	3424600	0.000214129	1.65317	5673000	5527500	5783800	3189900	3358500	3725400
Q8K3K7	1-acylglycerol-3-phosphate O-acyltransferase 2 (lysophosphatidic acid acyltransferase, beta)	sp|Q8K3K7|PLCB_MOUSE 1-acyl-sn-glycerol-3-phosphate acyltransferase beta OS=Mus musculus OX=10090 GN=Agpat2 PE=1 SV=1	Agpat2	2	6	6	31.01	7.67603e+06	4643600	0.00218895	1.65303	7410100	7261000	8357000	4120200	4844000	4966600
A2A839;A2A838;P48193-2;P48193;A2A841;A2A842;A2AD32;A0A1D5RLV1	erythrocyte membrane protein band 4.1	\\tr|A2A839|A2A839_MOUSE Isoform of P48193, Protein 4.1 OS=Mus musculus OX=10090 GN=Epb41 PE=1 SV=1;tr|A2A838|A2A838_MOUSE Isoform of P48193, Protein 4.1 (Fragment) OS=Mus musculus OX=10090 GN=Epb41 PE=1 SV=1;sp|P48193-2|41_MOUSE Isoform of P48193, Isoform 2\\"\"\"\"\""	Epb41	11	6	5	72.423	2.42353e+06	1.46667e+06	0.000554346	1.65241	2397300	2394200	2479100	1285700	1537300	1577000
Q923T9-2;Q923T9-3;Q923T9;A0A2I3BQP6	calcium/calmodulin-dependent protein kinase II gamma	\\sp|Q923T9-2|KCC2G_MOUSE Isoform of Q923T9, Isoform 2 of Calcium/calmodulin-dependent protein kinase type II subunit gamma OS=Mus musculus OX=10090 GN=Camk2g;sp|Q923T9-3|KCC2G_MOUSE Isoform of Q923T9, Isoform 3 of Calcium/calmodulin-dependent protein kinase\\"\"\"\"\""	Camk2g	8	6	4	58.365	1.38043e+06	835623	0.000572882	1.65198	1352200	1338100	1451000	756480	852590	897800
Q8BH43	WAS protein family, member 2	sp|Q8BH43|WASF2_MOUSE Wiskott-Aldrich syndrome protein family member 2 OS=Mus musculus OX=10090 GN=Wasf2 PE=1 SV=1	Wasf2	2	5	5	54.073	1.49657e+06	907287	0.00218213	1.6495	1451400	1454600	1583700	770530	937130	1014200
Q8VCW8	acyl-CoA synthetase family member 2	\\sp|Q8VCW8|ACSF2_MOUSE Acyl-CoA synthetase family member 2, mitochondrial OS=Mus musculus OX=10090 GN=Acsf2 PE=1 SV=1\\"\"\"\"\""	Acsf2	1	19	19	67.95	1.27013e+07	7.70767e+06	0.00159718	1.64788	12463000	11965000	13676000	6885900	8021100	8216000
Q9Z0J0	NPC intracellular cholesterol transporter 2	sp|Q9Z0J0|NPC2_MOUSE NPC intracellular cholesterol transporter 2 OS=Mus musculus OX=10090 GN=Npc2 PE=1 SV=1	Npc2	1	5	5	16.442	4.61427e+06	2801600	0.00254607	1.64701	4724400	4189800	4928600	2521700	2824800	3058300
Q3TTL7;A0A2R8VJW4;Q8CI96;A0A2R8VHV0;Q8CI96-2;A0A2R8VI93	CAP-GLY domain containing linker protein family, member 4	\\tr|Q3TTL7|Q3TTL7_MOUSE Isoform of Q8CI96, CAP-Gly domain-containing linker protein 4 OS=Mus musculus OX=10090 GN=Clip4 PE=1 SV=1;tr|A0A2R8VJW4|A0A2R8VJW4_MOUSE Isoform of Q8CI96, CAP-Gly domain-containing linker protein 4 OS=Mus musculus OX=10090 GN=Clip4 \\"\"\"\"\""	Clip4	12	16	16	64.347	9.66603e+06	5.86943e+06	0.000290306	1.64684	9499500	9517500	9981100	5362200	5922000	6324100
Q80YD3	family with sequence similarity 205, member C	sp|Q80YD3|F205C_MOUSE Protein FAM205C OS=Mus musculus OX=10090 GN=Fam205c PE=2 SV=1	Fam205c	1	16	1	41.486	31160000	18923000	0.000693103	1.64667	30711000	30498000	32271000	16713000	19390000	20666000
P61164	ARP1 actin-related protein 1A, centractin alpha	sp|P61164|ACTZ_MOUSE Alpha-centractin OS=Mus musculus OX=10090 GN=Actr1a PE=1 SV=1	Actr1a	1	13	5	42.613	1.64953e+07	10036900	0.00144654	1.64347	16623000	15643000	17220000	8673700	10574000	10863000
Q9DAN1	protein disulfide isomerase-like, testis expressed	sp|Q9DAN1|PDILT_MOUSE Protein disulfide-isomerase-like protein of the testis OS=Mus musculus OX=10090 GN=Pdilt PE=1 SV=2	Pdilt	2	42	42	67.758	324010000	1.97213e+08	0.00202418	1.64294	297080000	332780000	342170000	181910000	190660000	219070000
Q497L1	H2A histone family member L1N	tr|Q497L1|Q497L1_MOUSE Histone H2A OS=Mus musculus OX=10090 GN=H2al1n PE=2 SV=1	H2al1n	1	3	2	12.352	334410	203600	0.000612869	1.64248	347280	348050	307900	200700	203230	206870
Q8BKE6	cytochrome P450, family 20, subfamily a, polypeptide 1	sp|Q8BKE6|CP20A_MOUSE Cytochrome P450 20A1 OS=Mus musculus OX=10090 GN=Cyp20a1 PE=1 SV=1	Cyp20a1	1	5	5	52.149	1.57363e+06	958680	0.00775382	1.64146	1425500	1753500	1541900	838990	929750	1107300
P28798;Q3U9N4	granulin	\\sp|P28798|GRN_MOUSE Granulins OS=Mus musculus OX=10090 GN=Grn PE=1 SV=2;tr|Q3U9N4|Q3U9N4_MOUSE Isoform of P28798, Granulins OS=Mus musculus OX=10090 GN=Grn PE=1 SV=1\\"\"\"\"\""	Grn	4	9	6	63.458	4.71393e+06	2.87183e+06	0.000786325	1.64144	4523900	4586300	5031600	2635200	2940200	3040100
P24472	glutathione S-transferase, alpha 4	sp|P24472|GSTA4_MOUSE Glutathione S-transferase A4 OS=Mus musculus OX=10090 GN=Gsta4 PE=1 SV=3	Gsta4	2	7	5	25.564	5078900	3096300	0.00131991	1.64031	5078400	4747100	5411200	2802900	3147400	3338600
Q80XI4	phosphatidylinositol-5-phosphate 4-kinase, type II, beta	sp|Q80XI4|PI42B_MOUSE Phosphatidylinositol 5-phosphate 4-kinase type-2 beta OS=Mus musculus OX=10090 GN=Pip4k2b PE=1 SV=1	Pip4k2b	1	1	1	47.318	79061.7	48240.3	0.000860647	1.63888	79082	73459	84644	48792	45954	49975
Q9DAC0;A0A1D5RLT3	CKLF-like MARVEL transmembrane domain containing 2B	\\sp|Q9DAC0|CLF2B_MOUSE CKLF-like MARVEL transmembrane domain-containing protein 2B OS=Mus musculus OX=10090 GN=Cmtm2b PE=2 SV=1;tr|A0A1D5RLT3|A0A1D5RLT3_MOUSE Isoform of Q9DAC0, CKLF-like MARVEL transmembrane domain-containing protein 2B (Fragment) OS=Mus m\\"\"\"\"\""	Cmtm2b	2	7	7	24.366	6626500	4.05017e+06	0.000356656	1.63611	6474300	6650000	6755200	3709400	3996200	4444900
Q9QZA0	carbonic anhydrase 5b, mitochondrial	\\sp|Q9QZA0|CAH5B_MOUSE Carbonic anhydrase 5B, mitochondrial OS=Mus musculus OX=10090 GN=Ca5b PE=1 SV=2\\"\"\"\"\""	Car5b	1	4	4	36.622	1.06947e+06	654050	0.000144514	1.63514	1032600	1083700	1092100	615710	652160	694280
O35604	NPC intracellular cholesterol transporter 1	sp|O35604|NPC1_MOUSE NPC intracellular cholesterol transporter 1 OS=Mus musculus OX=10090 GN=Npc1 PE=1 SV=2	Npc1	1	3	3	142.88	1.13617e+06	695457	0.00285816	1.6337	1085500	1074900	1248100	619960	730150	736260
Q6P069-2;Q6P069	sorcin	\\sp|Q6P069-2|SORCN_MOUSE Isoform of Q6P069, Isoform 2 of Sorcin OS=Mus musculus OX=10090 GN=Sri;sp|Q6P069|SORCN_MOUSE Sorcin OS=Mus musculus OX=10090 GN=Sri PE=1 SV=1\\"\"\"\"\""	Sri	2	3	3	20.296	404863	247883	0.000693574	1.63328	409630	383850	421110	227390	246080	270180
A0A0R4J083;P51174	acyl-Coenzyme A dehydrogenase, long-chain	\\tr|A0A0R4J083|A0A0R4J083_MOUSE Isoform of P51174, Long-chain-specific acyl-CoA dehydrogenase, mitochondrial OS=Mus musculus OX=10090 GN=Acadl PE=1 SV=1;sp|P51174|ACADL_MOUSE Long-chain specific acyl-CoA dehydrogenase, mitochondrial OS=Mus musculus OX=10090\\"\"\"\"\""	Acadl	2	14	14	47.896	21129000	12941000	0.00093493	1.63272	20986000	20178000	22223000	11675000	12977000	14171000
P14483;P06346;P06344;P06343	histocompatibility 2, class II antigen A, beta 1	\\sp|P14483|HB2A_MOUSE Isoform of P01921, H-2 class II histocompatibility antigen, A beta chain OS=Mus musculus OX=10090 GN=H2-Ab1 PE=1 SV=1;sp|P06346|HB2F_MOUSE Isoform of P01921, H-2 class II histocompatibility antigen, A-F beta chain (Fragment) OS=Mus mus\\"\"\"\"\""	H2-Ab1	7	3	3	30.128	875030	536243	0.000250022	1.63177	885510	854330	885250	506380	515380	586970
Q61233	lymphocyte cytosolic protein 1	sp|Q61233|PLSL_MOUSE Plastin-2 OS=Mus musculus OX=10090 GN=Lcp1 PE=1 SV=4	Lcp1	1	6	4	70.148	793377	486627	0.000848286	1.63036	770700	781790	827640	447450	468370	544060
Q9CPT4	myeloid derived growth factor	sp|Q9CPT4|MYDGF_MOUSE Myeloid-derived growth factor OS=Mus musculus OX=10090 GN=Mydgf PE=1 SV=1	Mydgf	1	5	5	17.982	1.21917e+07	7.47823e+06	0.0102591	1.63029	12811000	10375000	13389000	6597200	7695000	8142500
Q8K409	polymerase (DNA directed), beta	sp|Q8K409|DPOLB_MOUSE DNA polymerase beta OS=Mus musculus OX=10090 GN=Polb PE=1 SV=3	Polb	2	18	18	38.287	1.96447e+07	1.20517e+07	0.00312017	1.63004	19911000	17956000	21067000	10518000	12646000	12991000
A0A0R4J1G9;Q8CI59;E9QN92;Q8CI59-2;D3YTP0	STEAP family member 3	\\tr|A0A0R4J1G9|A0A0R4J1G9_MOUSE Isoform of Q8CI59, Metalloreductase STEAP3 OS=Mus musculus OX=10090 GN=Steap3 PE=1 SV=1;sp|Q8CI59|STEA3_MOUSE Metalloreductase STEAP3 OS=Mus musculus OX=10090 GN=Steap3 PE=1 SV=1;tr|E9QN92|E9QN92_MOUSE Isoform of Q8CI59, Meta\\"\"\"\"\""	Steap3	5	2	2	54.747	420883	258213	0.000153283	1.62998	432490	399970	430190	250130	256800	267710
Q5DTI8	extended synaptotagmin-like protein 3	sp|Q5DTI8|ESYT3_MOUSE Extended synaptotagmin-3 OS=Mus musculus OX=10090 GN=Esyt3 PE=2 SV=2	Esyt3	3	4	4	100.07	1.00464e+06	616727	0.00345681	1.62898	1067100	926210	1020600	531950	624080	694150
Q9QWR8;Q3UZX5;A0A2R8VHH9	N-acetyl galactosaminidase, alpha	\\sp|Q9QWR8|NAGAB_MOUSE Alpha-N-acetylgalactosaminidase OS=Mus musculus OX=10090 GN=Naga PE=1 SV=2;tr|Q3UZX5|Q3UZX5_MOUSE Isoform of Q9QWR8, Alpha-galactosidase OS=Mus musculus OX=10090 GN=Naga PE=1 SV=1;tr|A0A2R8VHH9|A0A2R8VHH9_MOUSE Isoform of Q9QWR8, Alph\\"\"\"\"\""	Naga	5	12	4	47.234	5.30023e+06	3.25433e+06	0.00181644	1.62867	5355300	5021000	5524400	2815700	3325500	3621800
Q80X86	armadillo repeat containing 12	sp|Q80X86|ARM12_MOUSE Armadillo repeat-containing protein 12 OS=Mus musculus OX=10090 GN=Armc12 PE=2 SV=1	Armc12	1	15	15	38.529	4.02343e+07	2.47043e+07	0.00172971	1.62863	38678000	39558000	42467000	21523000	25072000	27518000
P17710;P17710-4;G3UVV4;P17710-3	hexokinase 1	\\sp|P17710|HXK1_MOUSE Hexokinase-1 OS=Mus musculus OX=10090 GN=Hk1 PE=1 SV=3;sp|P17710-4|HXK1_MOUSE Isoform of P17710, Isoform HK1-SC of Hexokinase-1 OS=Mus musculus OX=10090 GN=Hk1;tr|G3UVV4|G3UVV4_MOUSE Isoform of P17710, Hexokinase 1, isoform CRA_f OS=Mu\\"\"\"\"\""	Hk1	13	45	2	108.3	9.13857e+07	5.61277e+07	0.00239917	1.62818	90906000	84782000	98469000	49610000	58384000	60389000
Q3V3R1	methylenetetrahydrofolate dehydrogenase (NADP+ dependent) 1-like	\\sp|Q3V3R1|C1TM_MOUSE Monofunctional C1-tetrahydrofolate synthase, mitochondrial OS=Mus musculus OX=10090 GN=Mthfd1l PE=1 SV=2\\"\"\"\"\""	Mthfd1l	1	28	27	105.73	1.39157e+07	8549000	0.00105535	1.62775	13650000	13410000	14687000	7591500	8803000	9252500
Q9CVD2;F6T5L3;E9Q717;Q5M8S1	ataxin 3	\\sp|Q9CVD2|ATX3_MOUSE Ataxin-3 OS=Mus musculus OX=10090 GN=Atxn3 PE=1 SV=2;tr|F6T5L3|F6T5L3_MOUSE Isoform of Q9CVD2, Ataxin-3 (Fragment) OS=Mus musculus OX=10090 GN=Atxn3 PE=1 SV=1;tr|E9Q717|E9Q717_MOUSE Isoform of Q9CVD2, Ataxin-3 OS=Mus musculus OX=10090 \\"\"\"\"\""	Atxn3	5	10	10	40.533	4.39437e+06	2.70053e+06	0.000334717	1.62722	4373400	4265900	4543800	2491600	2688600	2921400
P09242	alkaline phosphatase, liver/bone/kidney	\\sp|P09242|PPBT_MOUSE Alkaline phosphatase, tissue-nonspecific isozyme OS=Mus musculus OX=10090 GN=Alpl PE=1 SV=2\\"\"\"\"\""	Alpl	4	4	4	57.514	1.25183e+06	770733	0.00260098	1.62421	1248400	1163200	1343900	672650	807860	831690
Q07417	acyl-Coenzyme A dehydrogenase, short chain	\\sp|Q07417|ACADS_MOUSE Short-chain specific acyl-CoA dehydrogenase, mitochondrial OS=Mus musculus OX=10090 GN=Acads PE=1 SV=2\\"\"\"\"\""	Acads	1	13	13	44.889	10058600	6.19333e+06	0.00157176	1.6241	9779900	9656900	10739000	5477100	6375700	6727200
Q3V0M1;B7ZWJ3	predicted gene 906	\\tr|Q3V0M1|Q3V0M1_MOUSE Gene model 906, (NCBI) OS=Mus musculus OX=10090 GN=Gm906 PE=2 SV=1;tr|B7ZWJ3|B7ZWJ3_MOUSE Predicted gene, EG667693 OS=Mus musculus OX=10090 GN=Gm8765 PE=2 SV=1\\"\"\"\"\""	Gm906	2	12	11	114.38	2.08387e+06	1.28383e+06	0.00208636	1.62316	2104500	1933700	2213400	1132900	1324600	1394000
Q9DBG5	perilipin 3	sp|Q9DBG5|PLIN3_MOUSE Perilipin-3 OS=Mus musculus OX=10090 GN=Plin3 PE=1 SV=1	Plin3	1	8	8	47.262	3606800	2222200	0.000157786	1.62308	3642500	3539100	3638800	2085800	2178100	2402700
Q5SRX1-3;Q5SRX1-4;Q5SRX1-2;Q5SRX1;Q5SXA4;Q5SRX1-5;Q5SXA5	target of myb1-like 2 (chicken)	\\sp|Q5SRX1-3|TM1L2_MOUSE Isoform of Q5SRX1, Isoform 3 of TOM1-like protein 2 OS=Mus musculus OX=10090 GN=Tom1l2;sp|Q5SRX1-4|TM1L2_MOUSE Isoform of Q5SRX1, Isoform 4 of TOM1-like protein 2 OS=Mus musculus OX=10090 GN=Tom1l2;sp|Q5SRX1-2|TM1L2_MOUSE Isoform of\\"\"\"\"\""	Tom1l2	8	7	6	48.407	2.73557e+06	1.68547e+06	0.000844524	1.62303	2721100	2699900	2785700	1496300	1670400	1889700
E9Q1J7;Q99MN9	propionyl Coenzyme A carboxylase, beta polypeptide	\\tr|E9Q1J7|E9Q1J7_MOUSE Isoform of Q99MN9, Propionyl-CoA carboxylase beta chain, mitochondrial OS=Mus musculus OX=10090 GN=Pccb PE=1 SV=1;sp|Q99MN9|PCCB_MOUSE Propionyl-CoA carboxylase beta chain, mitochondrial OS=Mus musculus OX=10090 GN=Pccb PE=1 SV=2\\"\"\"\"\""	Pccb	4	15	15	54.613	5.94963e+06	3.66663e+06	0.00164548	1.62264	5728600	5728400	6391900	3269400	3770600	3959900
Q8K0D0-2;A0A1L1SUS7;Q8K0D0	cyclin-dependent kinase 17	\\sp|Q8K0D0-2|CDK17_MOUSE Isoform of Q8K0D0, Isoform 2 of Cyclin-dependent kinase 17 OS=Mus musculus OX=10090 GN=Cdk17;tr|A0A1L1SUS7|A0A1L1SUS7_MOUSE Isoform of Q8K0D0, Cyclin-dependent kinase 17 (Fragment) OS=Mus musculus OX=10090 GN=Cdk17 PE=1 SV=1;sp|Q8K0\\"\"\"\"\""	Cdk17	3	8	0	48.974	203500	125480	0.00413913	1.62176	212410	182870	215220	111830	124280	140330
Q91YJ2	sorting nexin 4	sp|Q91YJ2|SNX4_MOUSE Sorting nexin-4 OS=Mus musculus OX=10090 GN=Snx4 PE=1 SV=1	Snx4	1	3	3	51.777	282067	173983	0.00714732	1.62122	290120	248950	307130	150040	179600	192310
Q6ZWQ9;Q3THE2	myosin, light chain 12A, regulatory, non-sarcomeric;novel protein;predicted gene, 49909	tr|Q6ZWQ9|Q6ZWQ9_MOUSE MCG5400 OS=Mus musculus OX=10090 GN=Myl12a PE=1 SV=1;sp|Q3THE2|ML12B_MOUSE Myosin regulatory light chain 12B OS=Mus musculus OX=10090 GN=Myl12b PE=1 SV=2	Myl12a;AC154187.2;Gm49909	4	5	2	19.895	5.84853e+06	3608500	0.000144539	1.62077	5727400	5787500	6030700	3398700	3585700	3841100
Q60963;E9Q330	phospholipase A2, group VII (platelet-activating factor acetylhydrolase, plasma)	\\sp|Q60963|PAFA_MOUSE Platelet-activating factor acetylhydrolase OS=Mus musculus OX=10090 GN=Pla2g7 PE=2 SV=2;tr|E9Q330|E9Q330_MOUSE Isoform of Q60963, Platelet-activating factor acetylhydrolase (Fragment) OS=Mus musculus OX=10090 GN=Pla2g7 PE=1 SV=1\\"\"\"\"\""	Pla2g7	4	7	7	49.258	2.42013e+06	1.49373e+06	0.00141662	1.62019	2454400	2270500	2535500	1325700	1532200	1623300
G5E8B1;Q64512	protein tyrosine phosphatase, non-receptor type 13	\\tr|G5E8B1|G5E8B1_MOUSE Isoform of Q64512, Protein tyrosine phosphatase, non-receptor type 13 OS=Mus musculus OX=10090 GN=Ptpn13 PE=1 SV=1;sp|Q64512|PTN13_MOUSE Tyrosine-protein phosphatase non-receptor type 13 OS=Mus musculus OX=10090 GN=Ptpn13 PE=1 SV=2\\"\"\"\"\""	Ptpn13	2	4	4	270.23	671130	414283	0.00034827	1.61997	672470	646740	694180	380490	419930	442430
Q920S1;Q76HN3	granzyme N	\\tr|Q920S1|Q920S1_MOUSE Granzyme N OS=Mus musculus OX=10090 GN=Gzmn PE=1 SV=1;tr|Q76HN3|Q76HN3_MOUSE Isoform of Q920S1, Granzyme N OS=Mus musculus OX=10090 GN=Gzmn PE=2 SV=1\\"\"\"\"\""	Gzmn	2	4	4	26.888	3.41327e+06	2.10747e+06	0.00234224	1.61961	3384500	3175800	3679500	1865400	2241100	2215900
Q8BFW7-4	LIM domain containing preferred translocation partner in lipoma	\\sp|Q8BFW7-4|LPP_MOUSE Isoform of Q8BFW7, Isoform 4 of Lipoma-preferred partner homolog OS=Mus musculus OX=10090 GN=Lpp\\"\"\"\"\""	Lpp	1	19	2	52.535	1.77197e+07	10949000	0.00155799	1.61838	17833000	16435000	18891000	10023000	10987000	11837000
P68372;Q9D6F9	tubulin, beta 4B class IVB	sp|P68372|TBB4B_MOUSE Tubulin beta-4B chain OS=Mus musculus OX=10090 GN=Tubb4b PE=1 SV=1;sp|Q9D6F9|TBB4A_MOUSE Tubulin beta-4A chain OS=Mus musculus OX=10090 GN=Tubb4a PE=1 SV=3	Tubb4b	2	20	5	49.83	3.36353e+08	2.07837e+08	0.00116622	1.61835	322340000	330780000	355940000	185850000	211330000	226330000
D3Z5T8	RIKEN cDNA 4930407I10 gene	tr|D3Z5T8|D3Z5T8_MOUSE RIKEN cDNA 4930407I10 gene OS=Mus musculus OX=10090 GN=4930407I10Rik PE=1 SV=2	4930407I10Rik	1	38	38	168.1	1.56023e+07	9.64227e+06	0.0018353	1.61812	15455000	14640000	16712000	8562800	10059000	10305000
Q9CPW4;Q3UA72	actin related protein 2/3 complex, subunit 5	\\sp|Q9CPW4|ARPC5_MOUSE Actin-related protein 2/3 complex subunit 5 OS=Mus musculus OX=10090 GN=Arpc5 PE=1 SV=3;tr|Q3UA72|Q3UA72_MOUSE Isoform of Q9CPW4, Actin-related protein 2/3 complex subunit 5 OS=Mus musculus OX=10090 GN=Arpc5 PE=1 SV=1\\"\"\"\"\""	Arpc5	2	4	4	16.288	1.15497e+06	713880	0.000397673	1.61787	1124900	1141300	1198700	652770	720320	768550
P17439;A0A0G2JDK2	glucosidase, beta, acid	\\sp|P17439|GLCM_MOUSE Glucosylceramidase OS=Mus musculus OX=10090 GN=Gba PE=1 SV=1;tr|A0A0G2JDK2|A0A0G2JDK2_MOUSE Isoform of P17439, Glucosylceramidase OS=Mus musculus OX=10090 GN=Gba PE=1 SV=1\\"\"\"\"\""	Gba	2	7	7	57.621	1.11747e+06	690923	0.000105309	1.61735	1087600	1130200	1134600	644110	715580	713080
H7BXA9;Q80XD1-3;Q80XD1-2;Q80XD1;Q3V2R3;A0A0N4SVT0;A0A0N4SV96;A0A0N4SWG3	chimerin 2	\\tr|H7BXA9|H7BXA9_MOUSE Isoform of Q80XD1, Beta-chimaerin (Fragment) OS=Mus musculus OX=10090 GN=Chn2 PE=1 SV=1;sp|Q80XD1-3|CHIO_MOUSE Isoform of Q80XD1, Isoform 3 of Beta-chimaerin OS=Mus musculus OX=10090 GN=Chn2;sp|Q80XD1-2|CHIO_MOUSE Isoform of Q80XD1, \\"\"\"\"\""	Chn2	10	11	10	25.97	6594200	4.07723e+06	0.000704398	1.61732	6487800	6468400	6826400	3628700	4152500	4450500
P08226	apolipoprotein E	sp|P08226|APOE_MOUSE Apolipoprotein E OS=Mus musculus OX=10090 GN=Apoe PE=1 SV=2	Apoe	4	11	11	35.866	2.81573e+06	1741300	7.38e-05	1.61703	2821500	2796900	2828800	1636900	1731600	1855400
Q9CR86	calcium regulated heat stable protein 1	sp|Q9CR86|CHSP1_MOUSE Calcium-regulated heat stable protein 1 OS=Mus musculus OX=10090 GN=Carhsp1 PE=1 SV=1	Carhsp1	1	6	6	16.062	3.23627e+06	2.00273e+06	0.00245498	1.61592	3169100	3113500	3426200	1695000	2145600	2167600
Q91V12-2;Q91V12;E9PYH2;Q91V12-3	acyl-CoA thioesterase 7	\\sp|Q91V12-2|BACH_MOUSE Isoform of Q91V12, Isoform A of Cytosolic acyl coenzyme A thioester hydrolase OS=Mus musculus OX=10090 GN=Acot7;sp|Q91V12|BACH_MOUSE Cytosolic acyl coenzyme A thioester hydrolase OS=Mus musculus OX=10090 GN=Acot7 PE=1 SV=2;tr|E9PYH2|\\"\"\"\"\""	Acot7	4	18	1	37.555	3.06497e+07	1.89753e+07	0.000894795	1.61524	29960000	29849000	32140000	17225000	18738000	20963000
Q8VEE0;B2KGF0	ribulose-5-phosphate-3-epimerase	\\sp|Q8VEE0|RPE_MOUSE Ribulose-phosphate 3-epimerase OS=Mus musculus OX=10090 GN=Rpe PE=1 SV=1;tr|B2KGF0|B2KGF0_MOUSE Isoform of Q8VEE0, Ribulose-phosphate 3-epimerase OS=Mus musculus OX=10090 GN=Rpe PE=1 SV=1\\"\"\"\"\""	Rpe	2	1	1	24.945	114653	71001.3	0.0046592	1.61478	106270	120520	117170	59083	73296	80625
F6TY75	mex3 RNA binding family member D	\\tr|F6TY75|F6TY75_MOUSE Isoform of Q3UE17, RNA-binding protein MEX3D (Fragment) OS=Mus musculus OX=10090 GN=Mex3d PE=1 SV=1\\"\"\"\"\""	Mex3d	1	6	2	26.648	1.26357e+06	782700	0.000928203	1.61437	1236200	1210900	1343600	745080	746970	856050
Q8BVP6	Ly6/Plaur domain containing 4	sp|Q8BVP6|LYPD4_MOUSE Ly6/PLAUR domain-containing protein 4 OS=Mus musculus OX=10090 GN=Lypd4 PE=1 SV=1	Lypd4	2	7	7	26.996	17527000	1.08613e+07	0.000696842	1.61371	16691000	17400000	18490000	10278000	10510000	11796000
E9QMH7;Q9DBZ1	IKBKB interacting protein	\\tr|E9QMH7|E9QMH7_MOUSE Isoform of Q9DBZ1, Inhibitor of nuclear factor kappa-B kinase-interacting protein OS=Mus musculus OX=10090 GN=Ikbip PE=1 SV=1;sp|Q9DBZ1|IKIP_MOUSE Inhibitor of nuclear factor kappa-B kinase-interacting protein OS=Mus musculus OX=1009\\"\"\"\"\""	Ikbip	2	9	7	42.497	2.08897e+06	1294600	0.00027378	1.6136	2066400	2084400	2116100	1215400	1246200	1422200
Q9R1Z8;A0A2I3BS41;Q8K0M3	sorbin and SH3 domain containing 3	\\sp|Q9R1Z8|VINEX_MOUSE Vinexin OS=Mus musculus OX=10090 GN=Sorbs3 PE=1 SV=1;tr|A0A2I3BS41|A0A2I3BS41_MOUSE Isoform of Q9R1Z8, Vinexin OS=Mus musculus OX=10090 GN=Sorbs3 PE=1 SV=1;tr|Q8K0M3|Q8K0M3_MOUSE Isoform of Q9R1Z8, Sorbs3 protein OS=Mus musculus OX=10\\"\"\"\"\""	Sorbs3	3	36	36	82.348	3.21647e+07	1.99397e+07	0.00265858	1.6131	32285000	29862000	34347000	17401000	20687000	21731000
Q7TSD4;G5E8I6;Q7TSD4-6	thymus, brain and testes associated	\\sp|Q7TSD4|TBATA_MOUSE Protein TBATA OS=Mus musculus OX=10090 GN=Tbata PE=1 SV=2;tr|G5E8I6|G5E8I6_MOUSE Isoform of Q7TSD4, Protein TBATA OS=Mus musculus OX=10090 GN=Tbata PE=4 SV=2;sp|Q7TSD4-6|TBATA_MOUSE Isoform of Q7TSD4, Isoform 6 of Protein TBATA OS=Mus\\"\"\"\"\""	Tbata	8	9	1	43.841	4.50063e+06	2.79117e+06	0.0147064	1.61246	4567100	3902900	5031900	2307600	3178200	2887700
P59024;D6RDT0;D3YWB6	FK506 binding protein 14	\\sp|P59024|FKB14_MOUSE Peptidyl-prolyl cis-trans isomerase FKBP14 OS=Mus musculus OX=10090 GN=Fkbp14 PE=1 SV=1;tr|D6RDT0|D6RDT0_MOUSE Isoform of P59024, Peptidylprolyl isomerase OS=Mus musculus OX=10090 GN=Fkbp14 PE=1 SV=1;tr|D3YWB6|D3YWB6_MOUSE Isoform of \\"\"\"\"\""	Fkbp14	3	4	4	24.251	1588300	985180	0.00779527	1.61219	1649900	1377900	1737100	874440	1021900	1059200
Q6PHU5;Q6PHU5-2	sortilin 1	\\sp|Q6PHU5|SORT_MOUSE Sortilin OS=Mus musculus OX=10090 GN=Sort1 PE=1 SV=1;sp|Q6PHU5-2|SORT_MOUSE Isoform of Q6PHU5, Isoform 2 of Sortilin OS=Mus musculus OX=10090 GN=Sort1\\"\"\"\"\""	Sort1	2	17	17	91.199	9.12627e+06	5.66367e+06	0.00143833	1.61137	8778600	8981800	9618400	5046200	5642000	6302800
E9Q265;Q8R0F3;E9Q0Z7	sulfatase modifying factor 1	\\tr|E9Q265|E9Q265_MOUSE Isoform of Q8R0F3, Formylglycine-generating enzyme OS=Mus musculus OX=10090 GN=Sumf1 PE=1 SV=1;sp|Q8R0F3|SUMF1_MOUSE Formylglycine-generating enzyme OS=Mus musculus OX=10090 GN=Sumf1 PE=1 SV=2;tr|E9Q0Z7|E9Q0Z7_MOUSE Isoform of Q8R0F3\\"\"\"\"\""	Sumf1	3	4	4	37.841	642310	398743	0.00963898	1.61083	618420	739340	569170	387170	383270	425790
A0A0A6YY64;A2AUP3;A2AUP5;A2AUP1;Q7TS91;A2AUP4;A7UAK8;Q3U3S6;A7UAK5;A7UAK4;A0A0A6YW89	6-phosphofructo-2-kinase/fructose-2,6-biphosphatase 3	\\tr|A0A0A6YY64|A0A0A6YY64_MOUSE Isoform of A7UAK5, 6-phosphofructo-2-kinase/fructose-2,6-biphosphatase 3 OS=Mus musculus OX=10090 GN=Pfkfb3 PE=1 SV=1;tr|A2AUP3|A2AUP3_MOUSE Isoform of A7UAK5, 6-phosphofructo-2-kinase/fructose-2,6-biphosphatase 3 OS=Mus musc\\"\"\"\"\""	Pfkfb3	11	16	14	57.349	4.50237e+06	2.79563e+06	0.000609588	1.6105	4314900	4576400	4615800	2536900	2805900	3044100
Q99JI4	proteasome (prosome, macropain) 26S subunit, non-ATPase, 6	sp|Q99JI4|PSMD6_MOUSE 26S proteasome non-ATPase regulatory subunit 6 OS=Mus musculus OX=10090 GN=Psmd6 PE=1 SV=1	Psmd6	2	20	20	45.536	16061000	9975500	0.00211957	1.61004	15819000	15032000	17332000	8921500	10337000	10668000
Q9JK39-2	butyrophilin-like 10	\\sp|Q9JK39-2|BTNLA_MOUSE Isoform of Q9JK39, Isoform 2 of Butyrophilin-like protein 10 OS=Mus musculus OX=10090 GN=Btnl10\\"\"\"\"\""	Btnl10	3	3	3	54.151	944290	586583	0.00259216	1.60981	914740	899630	1018500	510160	625970	623620
A0A2I3BQ43;A0JP53;D3YXJ0	diacylglycerol kinase, eta	\\tr|A0A2I3BQ43|A0A2I3BQ43_MOUSE Isoform of D3YXJ0, Diacylglycerol kinase OS=Mus musculus OX=10090 GN=Dgkh PE=1 SV=1;tr|A0JP53|A0JP53_MOUSE Isoform of D3YXJ0, Diacylglycerol kinase OS=Mus musculus OX=10090 GN=Dgkh PE=1 SV=1;tr|D3YXJ0|D3YXJ0_MOUSE Diacylglyce\\"\"\"\"\""	Dgkh	4	4	4	114.26	1.52813e+06	949627	0.000286783	1.60919	1509100	1486700	1588600	881290	956690	1010900
P56392;A0A140LIU4	cytochrome c oxidase subunit 7A1	\\sp|P56392|CX7A1_MOUSE Cytochrome c oxidase subunit 7A1, mitochondrial OS=Mus musculus OX=10090 GN=Cox7a1 PE=1 SV=1;tr|A0A140LIU4|A0A140LIU4_MOUSE Isoform of P56392, Cytochrome c oxidase subunit 7A1, mitochondrial OS=Mus musculus OX=10090 GN=Cox7a1 PE=1 SV=\\"\"\"\"\""	Cox7a1	2	2	2	8.9863	583503	363177	0.000462907	1.60666	584690	576010	589810	339840	345510	404180
Q9ERR1-2;Q9ERR1	nudE neurodevelopment protein 1 like 1	\\sp|Q9ERR1-2|NDEL1_MOUSE Isoform of Q9ERR1, Isoform 2 of Nuclear distribution protein nudE-like 1 OS=Mus musculus OX=10090 GN=Ndel1;sp|Q9ERR1|NDEL1_MOUSE Nuclear distribution protein nudE-like 1 OS=Mus musculus OX=10090 GN=Ndel1 PE=1 SV=2\\"\"\"\"\""	Ndel1	5	17	17	35.51	5513700	3.43293e+06	0.00113494	1.60612	5598700	5154800	5787600	3119500	3500300	3679000
Q8BFP9	pyruvate dehydrogenase kinase, isoenzyme 1	\\sp|Q8BFP9|PDK1_MOUSE [Pyruvate dehydrogenase (acetyl-transferring)] kinase isozyme 1, mitochondrial OS=Mus musculus OX=10090 GN=Pdk1 PE=1 SV=2\\"\"\"\"\""	Pdk1	1	9	7	48.994	2.85203e+06	1775900	0.00042245	1.60596	2956600	2722700	2876800	1668600	1744600	1914500
Q8R2Y0;Q8R2Y0-2	abhydrolase domain containing 6	\\sp|Q8R2Y0|ABHD6_MOUSE Monoacylglycerol lipase ABHD6 OS=Mus musculus OX=10090 GN=Abhd6 PE=1 SV=1;sp|Q8R2Y0-2|ABHD6_MOUSE Isoform of Q8R2Y0, Isoform 2 of Monoacylglycerol lipase ABHD6 OS=Mus musculus OX=10090 GN=Abhd6\\"\"\"\"\""	Abhd6	2	13	13	38.204	4.00453e+06	2494600	0.000463839	1.60528	3967800	3913200	4132600	2242100	2587900	2653800
A2AC29;P70245	phenylalkylamine Ca2+ antagonist (emopamil) binding protein	\\tr|A2AC29|A2AC29_MOUSE Isoform of P70245, 3-beta-hydroxysteroid-Delta(8),Delta(7)-isomerase (Fragment) OS=Mus musculus OX=10090 GN=Ebp PE=1 SV=1;sp|P70245|EBP_MOUSE 3-beta-hydroxysteroid-Delta(8),Delta(7)-isomerase OS=Mus musculus OX=10090 GN=Ebp PE=1 SV=3\\"\"\"\"\""	Ebp	2	2	2	13.686	501763	312613	0.000741051	1.60506	498540	501540	505210	293440	291350	353050
Q7TPM5	sperm acrosome associated 9	sp|Q7TPM5|SACA9_MOUSE Sperm acrosome-associated protein 9 OS=Mus musculus OX=10090 GN=Spaca9 PE=1 SV=1	Spaca9	2	5	5	19.482	4.33047e+06	2.69903e+06	0.00313719	1.60445	4490200	3910700	4590500	2433100	2732800	2931200
Q9CPP7	lipase, gastric	sp|Q9CPP7|LIPG_MOUSE Gastric triacylglycerol lipase OS=Mus musculus OX=10090 GN=Lipf PE=2 SV=1	Lipf	1	3	3	44.637	1.15673e+06	721727	0.00589654	1.60273	1150300	1064900	1255000	601790	782000	781390
Q9D0J8	parathymosin	sp|Q9D0J8|PTMS_MOUSE Parathymosin OS=Mus musculus OX=10090 GN=Ptms PE=1 SV=3	Ptms	1	1	1	11.43	1.42327e+06	888317	0.000596706	1.6022	1392000	1519200	1358600	842220	920320	902410
Q99JR1	sideroflexin 1	sp|Q99JR1|SFXN1_MOUSE Sideroflexin-1 OS=Mus musculus OX=10090 GN=Sfxn1 PE=1 SV=3	Sfxn1	1	12	12	35.649	5.11667e+06	3193800	0.000622464	1.60206	5023800	5090600	5235600	2889400	3157000	3535000
Q80ZP8;Q3TMX5;Q9CXI5	mesencephalic astrocyte-derived neurotrophic factor	\\tr|Q80ZP8|Q80ZP8_MOUSE Isoform of Q9CXI5, Armet protein OS=Mus musculus OX=10090 GN=Manf PE=1 SV=1;tr|Q3TMX5|Q3TMX5_MOUSE Isoform of Q9CXI5, Arginine-rich, mutated in early stage tumors, isoform CRA_b OS=Mus musculus OX=10090 GN=Manf PE=1 SV=1;sp|Q9CXI5|MA\\"\"\"\"\""	Manf	6	14	14	19.012	1.04049e+08	6.49723e+07	0.000629365	1.60143	99536000	104240000	108370000	61449000	62293000	71175000
Q8BW41-2;Q8BW41	protein O-linked mannose beta 1,4-N-acetylglucosaminyltransferase 2	\\sp|Q8BW41-2|PMGT2_MOUSE Isoform of Q8BW41, Isoform 2 of Protein O-linked-mannose beta-1,4-N-acetylglucosaminyltransferase 2 OS=Mus musculus OX=10090 GN=Pomgnt2;sp|Q8BW41|PMGT2_MOUSE Protein O-linked-mannose beta-1,4-N-acetylglucosaminyltransferase 2 OS=Mus\\"\"\"\"\""	Pomgnt2	2	4	4	66.66	1.15787e+06	723020	0.00178083	1.60143	1091600	1167500	1214500	655810	700660	812590
F7CK55;Q63ZW6	collagen, type IV, alpha 5	\\tr|F7CK55|F7CK55_MOUSE Isoform of Q63ZW6, Collagen, type IV, alpha 5 (Fragment) OS=Mus musculus OX=10090 GN=Col4a5 PE=1 SV=1;tr|Q63ZW6|Q63ZW6_MOUSE Col4a5 protein OS=Mus musculus OX=10090 GN=Col4a5 PE=1 SV=1\\"\"\"\"\""	Col4a5	2	5	3	77.887	1322600	826980	0.000677097	1.59931	1359400	1264400	1344000	741290	872670	866980
Q60813	a disintegrin and metallopeptidase domain 1a	sp|Q60813|ADM1A_MOUSE Disintegrin and metalloproteinase domain-containing protein 1a OS=Mus musculus OX=10090 GN=Adam1a PE=2 SV=3	Adam1a	1	19	11	87.489	8951700	5599000	0.00176389	1.5988	8730000	8547700	9577400	5129000	5452600	6215400
Q9Z1Q4;G3UYS0	lymphocyte antigen 6 complex, locus G6C	\\sp|Q9Z1Q4|LY66C_MOUSE Lymphocyte antigen 6 complex locus protein G6c OS=Mus musculus OX=10090 GN=Ly6g6c PE=1 SV=1;tr|G3UYS0|G3UYS0_MOUSE Isoform of Q9Z1Q4, Lymphocyte antigen 6 complex locus protein G6c OS=Mus musculus OX=10090 GN=Ly6g6c PE=1 SV=1\\"\"\"\"\""	Ly6g6c	3	3	3	14.066	974473	609760	0.00427782	1.59812	920390	949530	1053500	520400	626100	682780
P12025	midkine	sp|P12025|MK_MOUSE Midkine OS=Mus musculus OX=10090 GN=Mdk PE=2 SV=2	Mdk	1	9	9	15.434	15968000	9.99687e+06	0.00822886	1.5973	15349000	14515000	18040000	8800600	10381000	10809000
F8WIT2;P14824	annexin A6	\\tr|F8WIT2|F8WIT2_MOUSE Isoform of P14824, Annexin OS=Mus musculus OX=10090 GN=Anxa6 PE=1 SV=1;sp|P14824|ANXA6_MOUSE Annexin A6 OS=Mus musculus OX=10090 GN=Anxa6 PE=1 SV=3\\"\"\"\"\""	Anxa6	2	19	19	75.288	8.33397e+06	5.21843e+06	0.000560623	1.59702	8529500	7947200	8525200	4827500	5160900	5666900
Q9CWS0;D3YU15	dimethylarginine dimethylaminohydrolase 1	\\sp|Q9CWS0|DDAH1_MOUSE N(G),N(G)-dimethylarginine dimethylaminohydrolase 1 OS=Mus musculus OX=10090 GN=Ddah1 PE=1 SV=3;tr|D3YU15|D3YU15_MOUSE Isoform of Q9CWS0, Dimethylarginine dimethylaminohydrolase 1, isoform CRA_a OS=Mus musculus OX=10090 GN=Ddah1 PE=1 \\"\"\"\"\""	Ddah1	2	4	3	31.381	532207	333337	0.00156927	1.5966	551060	489680	555880	304010	343480	352520
Q9DC37	major facilitator superfamily domain containing 1	sp|Q9DC37|MFSD1_MOUSE Major facilitator superfamily domain-containing protein 1 OS=Mus musculus OX=10090 GN=Mfsd1 PE=1 SV=1	Mfsd1	1	1	1	51.396	187707	117566	0.011673	1.59659	175800	177180	210140	95028	130500	127170
Q5NCU4;P07214;A0A1L1SSH9	secreted acidic cysteine rich glycoprotein	\\tr|Q5NCU4|Q5NCU4_MOUSE Isoform of P07214, SPARC OS=Mus musculus OX=10090 GN=Sparc PE=1 SV=1;sp|P07214|SPRC_MOUSE SPARC OS=Mus musculus OX=10090 GN=Sparc PE=1 SV=1;tr|A0A1L1SSH9|A0A1L1SSH9_MOUSE Isoform of P07214, SPARC OS=Mus musculus OX=10090 GN=Sparc PE=\\"\"\"\"\""	Sparc	4	6	6	34.322	4.51957e+06	2.83077e+06	0.0115339	1.59659	4581100	3932200	5045400	2424400	2989500	3078400
Q99MR8;A0A0G2JFQ5	methylcrotonoyl-Coenzyme A carboxylase 1 (alpha)	\\sp|Q99MR8|MCCA_MOUSE Methylcrotonoyl-CoA carboxylase subunit alpha, mitochondrial OS=Mus musculus OX=10090 GN=Mccc1 PE=1 SV=2;tr|A0A0G2JFQ5|A0A0G2JFQ5_MOUSE Isoform of Q99MR8, Methylcrotonoyl-CoA carboxylase subunit alpha, mitochondrial OS=Mus musculus OX=\\"\"\"\"\""	Mccc1	3	13	13	79.343	3.18043e+06	1.99367e+06	0.0110807	1.59527	3152200	3643600	2745500	2018200	1887400	2075400
E9PYI8;Q9JMA1	ubiquitin specific peptidase 14	\\tr|E9PYI8|E9PYI8_MOUSE Isoform of Q9JMA1, Ubiquitin carboxyl-terminal hydrolase 14 OS=Mus musculus OX=10090 GN=Usp14 PE=1 SV=1;sp|Q9JMA1|UBP14_MOUSE Ubiquitin carboxyl-terminal hydrolase 14 OS=Mus musculus OX=10090 GN=Usp14 PE=1 SV=3\\"\"\"\"\""	Usp14	2	12	12	52.318	10175300	6.38567e+06	0.00241628	1.59346	9776200	9735700	11014000	5730400	6437200	6989400
Q64727	vinculin	sp|Q64727|VINC_MOUSE Vinculin OS=Mus musculus OX=10090 GN=Vcl PE=1 SV=4	Vcl	2	53	53	116.72	4.26797e+07	26812000	0.00278018	1.59181	42507000	39418000	46114000	23977000	27730000	28729000
Q5RL26;O35723	DnaJ heat shock protein family (Hsp40) member B3	\\tr|Q5RL26|Q5RL26_MOUSE Isoform of O35723, DnaJ (Hsp40) homolog, subfamily B, member 3 OS=Mus musculus OX=10090 GN=Dnajb3 PE=2 SV=1;sp|O35723|DNJB3_MOUSE DnaJ homolog subfamily B member 3 OS=Mus musculus OX=10090 GN=Dnajb3 PE=2 SV=1\\"\"\"\"\""	Dnajb3	2	13	11	26.65	33761000	21214000	0.0028949	1.59145	33738000	31133000	36412000	18904000	21901000	22837000
Q8VDQ8;A0A140LHL5;Q8VDQ8-2;Q8VDQ8-4;Q8VDQ8-3	sirtuin 2	\\sp|Q8VDQ8|SIR2_MOUSE NAD-dependent protein deacetylase sirtuin-2 OS=Mus musculus OX=10090 GN=Sirt2 PE=1 SV=2;tr|A0A140LHL5|A0A140LHL5_MOUSE Isoform of Q8VDQ8, NAD-dependent protein deacetylase OS=Mus musculus OX=10090 GN=Sirt2 PE=1 SV=1;sp|Q8VDQ8-2|SIR2_MO\\"\"\"\"\""	Sirt2	5	11	11	43.256	1.06499e+07	6.69273e+06	0.00179475	1.59126	10746000	9865600	11338000	6058000	6905900	7114300
Q9ERD7	tubulin, beta 3 class III	sp|Q9ERD7|TBB3_MOUSE Tubulin beta-3 chain OS=Mus musculus OX=10090 GN=Tubb3 PE=1 SV=1	Tubb3	2	15	3	50.418	10462100	6577000	0.00217559	1.59071	10360000	9848300	11178000	5893900	6571300	7265800
A0A087WQ94;A0A087WQM0;A0A087WQS0;A0A1D5RM59;E9Q0S6;A0A087WRU0;Q9DBT6	tensin 1	\\tr|A0A087WQ94|A0A087WQ94_MOUSE Isoform of E9Q0S6, Tensin 1 (Fragment) OS=Mus musculus OX=10090 GN=Tns1 PE=1 SV=1;tr|A0A087WQM0|A0A087WQM0_MOUSE Isoform of E9Q0S6, Tensin 1 OS=Mus musculus OX=10090 GN=Tns1 PE=1 SV=1;tr|A0A087WQS0|A0A087WQS0_MOUSE Isoform of\\"\"\"\"\""	Tns1	16	25	25	183.31	1.06153e+07	6.67453e+06	0.000536865	1.59042	10411000	10442000	10993000	6098500	6648000	7277100
Q3TXS7	proteasome (prosome, macropain) 26S subunit, non-ATPase, 1	sp|Q3TXS7|PSMD1_MOUSE 26S proteasome non-ATPase regulatory subunit 1 OS=Mus musculus OX=10090 GN=Psmd1 PE=1 SV=1	Psmd1	2	28	28	105.73	32160000	2.02287e+07	0.00526376	1.58982	31563000	29742000	35175000	17315000	21588000	21783000
Q8BMD8	solute carrier family 25 (mitochondrial carrier, phosphate carrier), member 24	sp|Q8BMD8|SCMC1_MOUSE Calcium-binding mitochondrial carrier protein SCaMC-1 OS=Mus musculus OX=10090 GN=Slc25a24 PE=1 SV=1	Slc25a24	1	8	8	52.901	5460500	3435000	0.00078902	1.58966	5396900	5205600	5779000	3150500	3549000	3605500
Q9D6V8	polyadenylate-binding protein-interacting protein 2	sp|Q9D6V8|PAIP2_MOUSE Polyadenylate-binding protein-interacting protein 2 OS=Mus musculus OX=10090 GN=Paip2 PE=1 SV=1	Paip2	1	2	1	14.7	2.04127e+06	1.28423e+06	0.00609433	1.58948	1913700	1953100	2257000	1118700	1293500	1440500
Q8K3U4	defensin beta 36	sp|Q8K3U4|DFB36_MOUSE Beta-defensin 36 OS=Mus musculus OX=10090 GN=Defb36 PE=3 SV=2	Defb36	1	4	4	7.7554	7.59097e+06	4.77763e+06	0.00356419	1.58885	7602100	7061100	8109700	4171600	4799400	5361900
O88174;O88174-2;A0A0R4J1X9	CD46 antigen, complement regulatory protein	\\sp|O88174|MCP_MOUSE Membrane cofactor protein OS=Mus musculus OX=10090 GN=Cd46 PE=1 SV=1;sp|O88174-2|MCP_MOUSE Isoform of O88174, Isoform 2 of Membrane cofactor protein OS=Mus musculus OX=10090 GN=Cd46;tr|A0A0R4J1X9|A0A0R4J1X9_MOUSE Isoform of O88174, CD46\\"\"\"\"\""	Cd46	3	6	6	40.881	9.65577e+06	6077200	0.00475802	1.58885	9696000	8743300	10528000	5364600	6312300	6554700
E0CXN5;P13707	glycerol-3-phosphate dehydrogenase 1 (soluble)	\\tr|E0CXN5|E0CXN5_MOUSE Isoform of P13707, Glycerol-3-phosphate dehydrogenase [NAD(+)] OS=Mus musculus OX=10090 GN=Gpd1 PE=1 SV=1;sp|P13707|GPDA_MOUSE Glycerol-3-phosphate dehydrogenase [NAD(+)], cytoplasmic OS=Mus musculus OX=10090 GN=Gpd1 PE=1 SV=3\\"\"\"\"\""	Gpd1	2	7	7	35.231	1749800	1.10153e+06	0.000726102	1.58851	1770600	1723700	1755100	1033200	1034100	1237300
P50285	flavin containing monooxygenase 1	sp|P50285|FMO1_MOUSE Dimethylaniline monooxygenase [N-oxide-forming] 1 OS=Mus musculus OX=10090 GN=Fmo1 PE=1 SV=1	Fmo1	5	8	8	59.914	1.23967e+06	780583	0.000390731	1.58813	1213200	1244400	1261400	728720	755250	857780
Q6NSQ9	glucose 6 phosphatase, catalytic, 3	sp|Q6NSQ9|G6PC3_MOUSE Glucose-6-phosphatase 3 OS=Mus musculus OX=10090 GN=G6pc3 PE=1 SV=1	G6pc3	1	3	3	38.781	1735900	1.09392e+06	0.00358599	1.58687	1747900	1586200	1873600	974750	1115000	1192000
E9Q175;E9Q3L1;E9PVU0;E9Q174;V9GXM4;V9GX76;Q64331	myosin VI	\\tr|E9Q175|E9Q175_MOUSE Isoform of Q64331, Unconventional myosin-VI OS=Mus musculus OX=10090 GN=Myo6 PE=1 SV=1;tr|E9Q3L1|E9Q3L1_MOUSE Isoform of Q64331, Unconventional myosin-VI OS=Mus musculus OX=10090 GN=Myo6 PE=1 SV=1;tr|E9PVU0|E9PVU0_MOUSE Isoform of Q6\\"\"\"\"\""	Myo6	7	33	33	144.77	1.51613e+07	9.56087e+06	0.00158697	1.58577	14998000	14437000	16049000	8461400	9907200	10314000
Q9JHI5	isovaleryl coenzyme A dehydrogenase	\\sp|Q9JHI5|IVD_MOUSE Isovaleryl-CoA dehydrogenase, mitochondrial OS=Mus musculus OX=10090 GN=Ivd PE=1 SV=1\\"\"\"\"\""	Ivd	1	17	17	46.325	2.60787e+07	16449000	0.000190062	1.58543	24953000	26216000	27067000	15866000	16283000	17198000
O35593	proteasome (prosome, macropain) 26S subunit, non-ATPase, 14	sp|O35593|PSDE_MOUSE 26S proteasome non-ATPase regulatory subunit 14 OS=Mus musculus OX=10090 GN=Psmd14 PE=1 SV=2	Psmd14	1	9	9	34.577	9.47887e+06	5980400	0.00267816	1.58499	9678100	8686500	10072000	5324500	6265400	6351300
Q8C0P5;B1AVH5	coronin, actin binding protein 2A	\\sp|Q8C0P5|COR2A_MOUSE Coronin-2A OS=Mus musculus OX=10090 GN=Coro2a PE=2 SV=1;tr|B1AVH5|B1AVH5_MOUSE Isoform of Q8C0P5, Coronin OS=Mus musculus OX=10090 GN=Coro2a PE=1 SV=1\\"\"\"\"\""	Coro2a	2	17	16	59.573	1.41053e+07	8.90933e+06	0.00196077	1.58321	13975000	13309000	15032000	8030800	8875500	9821700
Q9QXX4	solute carrier family 25 (mitochondrial carrier, adenine nucleotide translocator), member 13	sp|Q9QXX4|CMC2_MOUSE Calcium-binding mitochondrial carrier protein Aralar2 OS=Mus musculus OX=10090 GN=Slc25a13 PE=1 SV=1	Slc25a13	1	17	14	74.466	4.72243e+06	2983500	0.000358116	1.58285	4741700	4599600	4826000	2769300	2934300	3246900
P63001;Q3TLP8	Rac family small GTPase 1	\\sp|P63001|RAC1_MOUSE Ras-related C3 botulinum toxin substrate 1 OS=Mus musculus OX=10090 GN=Rac1 PE=1 SV=1;tr|Q3TLP8|Q3TLP8_MOUSE Isoform of P63001, RAS-related C3 botulinum substrate 1, isoform CRA_a OS=Mus musculus OX=10090 GN=Rac1 PE=1 SV=1\\"\"\"\"\""	Rac1	13	9	4	21.45	5.49473e+06	3.47673e+06	0.000425749	1.58043	5538500	5338100	5607600	3188400	3466200	3775600
Q9Z2D6;Q9Z2D6-2	methyl CpG binding protein 2	\\sp|Q9Z2D6|MECP2_MOUSE Methyl-CpG-binding protein 2 OS=Mus musculus OX=10090 GN=Mecp2 PE=1 SV=1;sp|Q9Z2D6-2|MECP2_MOUSE Isoform of Q9Z2D6, Isoform B of Methyl-CpG-binding protein 2 OS=Mus musculus OX=10090 GN=Mecp2\\"\"\"\"\""	Mecp2	4	13	13	52.307	6.10133e+06	3.86173e+06	0.00110253	1.57995	5799500	6105900	6398600	3546800	3796800	4241600
P61922;P61922-2	4-aminobutyrate aminotransferase	\\sp|P61922|GABT_MOUSE 4-aminobutyrate aminotransferase, mitochondrial OS=Mus musculus OX=10090 GN=Abat PE=1 SV=1;sp|P61922-2|GABT_MOUSE Isoform of P61922, Isoform 2 of 4-aminobutyrate aminotransferase, mitochondrial OS=Mus musculus OX=10090 GN=Abat\\"\"\"\"\""	Abat	5	15	15	56.451	1.58063e+07	1.00086e+07	0.00205409	1.57927	15722000	15142000	16555000	8679900	10274000	11072000
E9Q4T0;Q6PG16-3;Q6PG16-2;E9QKG8;Q6PG16	Holliday junction recognition protein	\\tr|E9Q4T0|E9Q4T0_MOUSE Isoform of Q6PG16, Holliday junction recognition protein OS=Mus musculus OX=10090 GN=Hjurp PE=1 SV=1;sp|Q6PG16-3|HJURP_MOUSE Isoform of Q6PG16, Isoform 3 of Holliday junction recognition protein OS=Mus musculus OX=10090 GN=Hjurp;sp|Q\\"\"\"\"\""	Hjurp	5	2	2	65.714	2772500	1.75667e+06	0.0143839	1.57827	2860100	2355400	3102000	1538900	1865900	1865200
P68368;A0A0A0MQA5	tubulin, alpha 4A	\\sp|P68368|TBA4A_MOUSE Tubulin alpha-4A chain OS=Mus musculus OX=10090 GN=Tuba4a PE=1 SV=1;tr|A0A0A0MQA5|A0A0A0MQA5_MOUSE Isoform of P68368, Tubulin alpha chain (Fragment) OS=Mus musculus OX=10090 GN=Tuba4a PE=1 SV=1\\"\"\"\"\""	Tuba4a	3	19	2	49.924	2.39263e+06	1.51603e+06	0.000639047	1.57822	2423300	2270900	2483700	1387400	1594500	1566200
P97742	carnitine palmitoyltransferase 1a, liver	\\sp|P97742|CPT1A_MOUSE Carnitine O-palmitoyltransferase 1, liver isoform OS=Mus musculus OX=10090 GN=Cpt1a PE=1 SV=4\\"\"\"\"\""	Cpt1a	1	14	13	88.25	1.11787e+07	7.08753e+06	0.00127623	1.57723	10738000	11085000	11713000	6289600	7267800	7705200
B7XG49	family with sequence similarity 71, member A	\\tr|B7XG49|B7XG49_MOUSE Family with sequence similarity 71, member A OS=Mus musculus OX=10090 GN=Fam71a PE=2 SV=1\\"\"\"\"\""	Fam71a	1	20	20	64.23	47071000	29865000	0.00360064	1.57613	47105000	43220000	50888000	26705000	30225000	32665000
Q91VR7	microtubule-associated protein 1 light chain 3 alpha	sp|Q91VR7|MLP3A_MOUSE Microtubule-associated proteins 1A/1B light chain 3A OS=Mus musculus OX=10090 GN=Map1lc3a PE=1 SV=1	Map1lc3a	2	4	4	14.272	739203	469033	0.000370635	1.57601	724150	734350	759110	426160	482380	498560
Q80VX2;O54901;E9QMY1;E9PZI9;Q05D16	CD200 antigen	\\tr|Q80VX2|Q80VX2_MOUSE Isoform of O54901, CD200 antigen OS=Mus musculus OX=10090 GN=Cd200 PE=1 SV=1;sp|O54901|OX2G_MOUSE OX-2 membrane glycoprotein OS=Mus musculus OX=10090 GN=Cd200 PE=1 SV=1;tr|E9QMY1|E9QMY1_MOUSE Isoform of O54901, OX-2 membrane glycopro\\"\"\"\"\""	Cd200	5	4	4	31.27	848557	538553	0.00387027	1.57562	752390	901400	891880	507530	536340	571790
P55144-3;P55144;P55144-2	TYRO3 protein tyrosine kinase 3	\\sp|P55144-3|TYRO3_MOUSE Isoform of P55144, Isoform 1 of Tyrosine-protein kinase receptor TYRO3 OS=Mus musculus OX=10090 GN=Tyro3;sp|P55144|TYRO3_MOUSE Tyrosine-protein kinase receptor TYRO3 OS=Mus musculus OX=10090 GN=Tyro3 PE=1 SV=2;sp|P55144-2|TYRO3_MOUS\\"\"\"\"\""	Tyro3	3	1	1	96.041	81712.3	51885	0.0072738	1.57484	79709	92728	72700	51698	50679	53278
Q9D529	WBP2 N-terminal like	sp|Q9D529|WBP2L_MOUSE Postacrosomal sheath WW domain-binding protein OS=Mus musculus OX=10090 GN=Wbp2nl PE=2 SV=1	Wbp2nl	1	9	9	37.485	6.42387e+06	4.08017e+06	0.000237635	1.57441	6414900	6248400	6608300	3814000	4070600	4355900
Q9CY64	biliverdin reductase A	sp|Q9CY64|BIEA_MOUSE Biliverdin reductase A OS=Mus musculus OX=10090 GN=Blvra PE=1 SV=1	Blvra	4	5	5	33.524	2.94507e+06	1.87133e+06	0.00478909	1.57378	2953200	2691400	3190600	1645000	1900700	2068300
E9QAF1	spermatogenesis associated 31 subfamily D, member 1C	\\tr|E9QAF1|E9QAF1_MOUSE Spermatogenesis-associated 31 subfamily D, member 1C OS=Mus musculus OX=10090 GN=Spata31d1c PE=4 SV=1\\"\"\"\"\""	Spata31d1c	1	22	22	95.08	2.04187e+07	1.29763e+07	0.0017545	1.57353	20041000	19553000	21662000	11516000	13266000	14147000
Q07797;E9Q5X5	lectin, galactoside-binding, soluble, 3 binding protein	\\sp|Q07797|LG3BP_MOUSE Galectin-3-binding protein OS=Mus musculus OX=10090 GN=Lgals3bp PE=1 SV=1;tr|E9Q5X5|E9Q5X5_MOUSE Isoform of Q07797, Galectin-3-binding protein (Fragment) OS=Mus musculus OX=10090 GN=Lgals3bp PE=1 SV=1\\"\"\"\"\""	Lgals3bp	2	2	2	64.49	246240	156557	0.00205045	1.57284	235550	245150	258020	140600	152000	177070
P97429;F7ANV6;D3Z0S1;A0A0N4SW89;A0A0N4SV57	annexin A4	\\sp|P97429|ANXA4_MOUSE Annexin A4 OS=Mus musculus OX=10090 GN=Anxa4 PE=1 SV=4;tr|F7ANV6|F7ANV6_MOUSE Isoform of P97429, Annexin (Fragment) OS=Mus musculus OX=10090 GN=Anxa4 PE=1 SV=1;tr|D3Z0S1|D3Z0S1_MOUSE Isoform of P97429, Annexin (Fragment) OS=Mus muscul\\"\"\"\"\""	Anxa4	6	11	11	35.915	4459500	2836300	0.000893134	1.57229	4368100	4359200	4651200	2574000	2821400	3113500
Q9D5N8;F7BXA4	spermidine/spermine N1-acetyl transferase-like 1	\\sp|Q9D5N8|SATL1_MOUSE Spermidine/spermine N(1)-acetyltransferase-like protein 1 OS=Mus musculus OX=10090 GN=Satl1 PE=2 SV=2;tr|F7BXA4|F7BXA4_MOUSE Isoform of Q9D5N8, Spermidine/spermine N(1)-acetyltransferase-like protein 1 (Fragment) OS=Mus musculus OX=10\\"\"\"\"\""	Satl1	2	11	11	83.275	3.75727e+06	2.39037e+06	0.00112045	1.57184	3606500	3715700	3949600	2161800	2403000	2606300
A0A0J9YV03	family with sequence similarity 187, member B	\\tr|A0A0J9YV03|A0A0J9YV03_MOUSE Isoform of Q0VAY3, Protein FAM187B OS=Mus musculus OX=10090 GN=Fam187b PE=4 SV=1\\"\"\"\"\""	Fam187b	1	10	3	41.952	2.01383e+07	12816000	0.000786868	1.57134	19611000	19455000	21349000	11796000	13155000	13497000
P45377	aldo-keto reductase family 1, member B8	sp|P45377|ALD2_MOUSE Aldose reductase-related protein 2 OS=Mus musculus OX=10090 GN=Akr1b8 PE=1 SV=2	Akr1b8	3	8	5	36.12	5.12327e+06	3.26067e+06	0.00066248	1.57123	4932800	5174000	5263000	3006600	3198700	3576700
Q8K248	4-hydroxyphenylpyruvate dioxygenase-like	sp|Q8K248|HPDL_MOUSE 4-hydroxyphenylpyruvate dioxygenase-like protein OS=Mus musculus OX=10090 GN=Hpdl PE=2 SV=1	Hpdl	1	1	1	39.909	80485	51247	0.00534006	1.5705	75408	82837	83210	42898	51783	59060
F6XQM2;Q9JIY0;F6VV25	pleckstrin homology domain containing, family O member 1	\\tr|F6XQM2|F6XQM2_MOUSE Isoform of Q9JIY0, Pleckstrin homology domain-containing family O member 1 (Fragment) OS=Mus musculus OX=10090 GN=Plekho1 PE=1 SV=1;sp|Q9JIY0|PKHO1_MOUSE Pleckstrin homology domain-containing family O member 1 OS=Mus musculus OX=1009\\"\"\"\"\""	Plekho1	4	8	8	41.129	1.38953e+06	885417	0.00204814	1.56935	1341600	1359100	1467900	806200	850080	999970
A0A0G2JE03;Q8BTZ4-2;Q3TWF7;A0A0G2JDM7;Q8BTZ4	anaphase-promoting complex subunit 5	\\tr|A0A0G2JE03|A0A0G2JE03_MOUSE Isoform of Q8BTZ4, Anaphase-promoting complex subunit 5 OS=Mus musculus OX=10090 GN=Anapc5 PE=1 SV=1;sp|Q8BTZ4-2|APC5_MOUSE Isoform of Q8BTZ4, Isoform 2 of Anaphase-promoting complex subunit 5 OS=Mus musculus OX=10090 GN=Anap\\"\"\"\"\""	Anapc5	7	3	3	80.831	2.82927e+06	1.80303e+06	0.00661458	1.56917	2721200	2612600	3154000	1591000	1863500	1954600
P28654	decorin	sp|P28654|PGS2_MOUSE Decorin OS=Mus musculus OX=10090 GN=Dcn PE=1 SV=1	Dcn	1	4	3	39.809	894447	570480	0.00094866	1.56788	857510	885930	939900	524880	564630	621930
G3X9T8;G3X8Q5;Q61147;E9PZD8	ceruloplasmin	\\tr|G3X9T8|G3X9T8_MOUSE Isoform of Q61147, Ceruloplasmin OS=Mus musculus OX=10090 GN=Cp PE=1 SV=1;tr|G3X8Q5|G3X8Q5_MOUSE Isoform of Q61147, Ceruloplasmin OS=Mus musculus OX=10090 GN=Cp PE=1 SV=1;sp|Q61147|CERU_MOUSE Ceruloplasmin OS=Mus musculus OX=10090 GN\\"\"\"\"\""	Cp	7	11	11	121.08	2.73503e+06	1.74483e+06	0.00586357	1.5675	2758900	2514900	2931300	1511300	1727900	1995300
Q9EP71	retinoic acid induced 14	sp|Q9EP71|RAI14_MOUSE Ankycorbin OS=Mus musculus OX=10090 GN=Rai14 PE=1 SV=1	Rai14	6	59	1	108.85	5.40647e+07	3.44967e+07	0.00440191	1.56724	54027000	49921000	58246000	29757000	36917000	36816000
Q6P1J1;P97427	collapsin response mediator protein 1	\\tr|Q6P1J1|Q6P1J1_MOUSE Isoform of P97427, Crmp1 protein OS=Mus musculus OX=10090 GN=Crmp1 PE=1 SV=1;sp|P97427|DPYL1_MOUSE Dihydropyrimidinase-related protein 1 OS=Mus musculus OX=10090 GN=Crmp1 PE=1 SV=1\\"\"\"\"\""	Crmp1	3	10	6	74.22	1.72347e+06	1.09968e+06	0.00183083	1.56724	1681100	1689400	1799900	958150	1123300	1217600
Q9R171	cerebellin 1 precursor protein	sp|Q9R171|CBLN1_MOUSE Cerebellin-1 OS=Mus musculus OX=10090 GN=Cbln1 PE=1 SV=1	Cbln1	2	3	3	21.113	663890	424120	0.00164924	1.56533	619860	699010	672800	390650	417190	464520
Q3TTL0	RIKEN cDNA 4930453N24 gene	sp|Q3TTL0|CC038_MOUSE Uncharacterized protein C3orf38 homolog OS=Mus musculus OX=10090 PE=2 SV=1	4930453N24Rik	1	6	6	39.532	588390	375920	0.000436471	1.5652	563150	584450	617570	358720	369860	399180
Q8K482	elastin microfibril interfacer 2	sp|Q8K482|EMIL2_MOUSE EMILIN-2 OS=Mus musculus OX=10090 GN=Emilin2 PE=1 SV=1	Emilin2	1	22	22	117.31	7.53177e+06	4.81207e+06	0.00187929	1.56518	7459100	7131700	8004500	4319300	4856700	5260200
Q9WVQ0	polyamine modulated factor 1 binding protein 1	sp|Q9WVQ0|PMFBP_MOUSE Polyamine-modulated factor 1-binding protein 1 OS=Mus musculus OX=10090 GN=Pmfbp1 PE=2 SV=1	Pmfbp1	1	54	54	119.4	26554000	1.69743e+07	0.00153292	1.56436	26773000	25021000	27868000	15311000	17092000	18520000
Q9JLB9	nectin cell adhesion molecule 3	sp|Q9JLB9|NECT3_MOUSE Nectin-3 OS=Mus musculus OX=10090 GN=Nectin3 PE=1 SV=1	Nectin3	4	11	11	60.582	1.01214e+07	6.47143e+06	0.00129505	1.56402	9990300	9729000	10645000	5766200	6677000	6971100
A0A087WSG3	predicted gene 28269	tr|A0A087WSG3|A0A087WSG3_MOUSE MCG1047152 OS=Mus musculus OX=10090 GN=Gm28269 PE=4 SV=1	Gm28269	1	7	7	13.857	2.30003e+07	1.47227e+07	0.00434254	1.56224	21999000	21546000	25456000	13527000	14669000	15972000
A2BFF8;O88487;Q3TPJ8;A2BFF5;A2BFF9	dynein cytoplasmic 1 intermediate chain 2	\\tr|A2BFF8|A2BFF8_MOUSE Isoform of O88487, Cytoplasmic dynein 1 intermediate chain 2 OS=Mus musculus OX=10090 GN=Dync1i2 PE=1 SV=1;sp|O88487|DC1I2_MOUSE Cytoplasmic dynein 1 intermediate chain 2 OS=Mus musculus OX=10090 GN=Dync1i2 PE=1 SV=1;tr|Q3TPJ8|Q3TPJ8\\"\"\"\"\""	Dync1i2	11	14	14	68.265	17345000	1.11027e+07	0.000695563	1.56224	17109000	16837000	18089000	10159000	11123000	12026000
Q02357-5;E9QNT8;Q02357;G8JL84;Q02357-3;D3Z5M4;Q0VGY9;Q02357-4;A0A0R4J1N7;Q02357-6;G5E8J2;Q02357-2;B7ZW98;D3YTV8;F7D1P5;D6RJ51;G3UY11	ankyrin 1, erythroid	\\sp|Q02357-5|ANK1_MOUSE Isoform of Q02357, Isoform 5 of Ankyrin-1 OS=Mus musculus OX=10090 GN=Ank1;tr|E9QNT8|E9QNT8_MOUSE Isoform of Q02357, Ankyrin-1 OS=Mus musculus OX=10090 GN=Ank1 PE=1 SV=1;sp|Q02357|ANK1_MOUSE Ankyrin-1 OS=Mus musculus OX=10090 GN=Ank1\\"\"\"\"\""	Ank1	20	13	12	192.03	3.07283e+06	1967300	0.00154999	1.56195	3086100	2970400	3162000	1719900	2007100	2174900
Q8BXF8	actin related protein T3	sp|Q8BXF8|ACTT3_MOUSE Actin-related protein T3 OS=Mus musculus OX=10090 GN=Actrt3 PE=1 SV=1	Actrt3	1	15	15	40.442	10134700	6.49367e+06	0.00245649	1.56071	9992200	9698900	10713000	5685600	6580600	7214800
Q91X96	RAB interacting factor	sp|Q91X96|MSS4_MOUSE Guanine nucleotide exchange factor MSS4 OS=Mus musculus OX=10090 GN=Rabif PE=1 SV=1	Rabif	1	6	6	13.915	2426200	1.55513e+06	0.00251046	1.56012	2420900	2299100	2558600	1351400	1612700	1701300
P49722;Q8BKE0	proteasome (prosome, macropain) subunit, alpha type 2	\\sp|P49722|PSA2_MOUSE Proteasome subunit alpha type-2 OS=Mus musculus OX=10090 GN=Psma2 PE=1 SV=3;tr|Q8BKE0|Q8BKE0_MOUSE Isoform of P49722, Proteasome endopeptidase complex (Fragment) OS=Mus musculus OX=10090 GN=Psma2 PE=1 SV=1\\"\"\"\"\""	Psma2	2	8	8	25.926	8.19483e+06	5.25593e+06	0.00096929	1.55916	8066500	7895300	8622700	4744000	5460200	5563600
P16546;P16546-2;A3KGU7;A3KGU9;A3KGU5;E9Q447	spectrin alpha, non-erythrocytic 1	\\sp|P16546|SPTN1_MOUSE Spectrin alpha chain, non-erythrocytic 1 OS=Mus musculus OX=10090 GN=Sptan1 PE=1 SV=4;sp|P16546-2|SPTN1_MOUSE Isoform of P16546, Isoform 2 of Spectrin alpha chain, non-erythrocytic 1 OS=Mus musculus OX=10090 GN=Sptan1;tr|A3KGU7|A3KGU7\\"\"\"\"\""	Sptan1	7	87	86	284.59	49739000	31908000	0.00143936	1.55883	49664000	47220000	52333000	28684000	32407000	34633000
O88792	F11 receptor	sp|O88792|JAM1_MOUSE Junctional adhesion molecule A OS=Mus musculus OX=10090 GN=F11r PE=1 SV=2	F11r	1	3	3	32.423	575650	369657	0.00585301	1.55725	595510	526490	604950	341960	338520	428490
E9Q4M2;P54310;P54310-2	lipase, hormone sensitive	\\tr|E9Q4M2|E9Q4M2_MOUSE Isoform of P54310, Hormone-sensitive lipase OS=Mus musculus OX=10090 GN=Lipe PE=1 SV=1;sp|P54310|LIPS_MOUSE Hormone-sensitive lipase OS=Mus musculus OX=10090 GN=Lipe PE=1 SV=2;sp|P54310-2|LIPS_MOUSE Isoform of P54310, Isoform 2 of Ho\\"\"\"\"\""	Lipe	5	28	28	117.28	3.45937e+07	22225000	0.0080132	1.55652	35340000	32605000	35836000	17898000	22973000	25804000
Q61425	hydroxyacyl-Coenzyme A dehydrogenase	\\sp|Q61425|HCDH_MOUSE Hydroxyacyl-coenzyme A dehydrogenase, mitochondrial OS=Mus musculus OX=10090 GN=Hadh PE=1 SV=2\\"\"\"\"\""	Hadh	1	16	15	34.463	4.18143e+07	26870000	0.00240751	1.55617	41857000	38841000	44745000	24551000	26754000	29305000
Q9DCT5;A0A0R4IZW9	stromal cell derived factor 2	\\sp|Q9DCT5|SDF2_MOUSE Stromal cell-derived factor 2 OS=Mus musculus OX=10090 GN=Sdf2 PE=1 SV=1;tr|A0A0R4IZW9|A0A0R4IZW9_MOUSE Isoform of Q9DCT5, Stromal cell-derived factor 2 OS=Mus musculus OX=10090 GN=Sdf2 PE=1 SV=1\\"\"\"\"\""	Sdf2	2	4	4	23.159	2.97857e+06	1914700	0.00073468	1.55563	2792300	3138900	3004500	1824100	1911900	2008100
Q8BX02;Q8BX02-2	KN motif and ankyrin repeat domains 2	\\sp|Q8BX02|KANK2_MOUSE KN motif and ankyrin repeat domain-containing protein 2 OS=Mus musculus OX=10090 GN=Kank2 PE=1 SV=1;sp|Q8BX02-2|KANK2_MOUSE Isoform of Q8BX02, Isoform 2 of KN motif and ankyrin repeat domain-containing protein 2 OS=Mus musculus OX=100\\"\"\"\"\""	Kank2	2	3	3	90.244	284653	183010	0.00389322	1.55539	291120	268500	294340	157050	208580	183400
P10605	cathepsin B	sp|P10605|CATB_MOUSE Cathepsin B OS=Mus musculus OX=10090 GN=Ctsb PE=1 SV=2	Ctsb	1	5	5	37.279	2.42223e+06	1557500	0.00373532	1.5552	2407200	2289500	2570000	1325700	1703000	1643800
Q99JW4;A0A0R4J005;E9QP62;Q91XD2;Q9D7B2	LIM and senescent cell antigen-like domains 1	\\sp|Q99JW4|LIMS1_MOUSE LIM and senescent cell antigen-like-containing domain protein 1 OS=Mus musculus OX=10090 GN=Lims1 PE=1 SV=3;tr|A0A0R4J005|A0A0R4J005_MOUSE Isoform of Q99JW4, LIM and senescent cell antigen-like-containing domain protein OS=Mus musculu\\"\"\"\"\""	Lims1	5	2	2	37.24	228160	146723	0.0106552	1.55502	233020	201370	250090	128660	144900	166610
Q8BH64	EH-domain containing 2	sp|Q8BH64|EHD2_MOUSE EH domain-containing protein 2 OS=Mus musculus OX=10090 GN=Ehd2 PE=1 SV=1	Ehd2	2	8	7	61.174	1.22873e+06	790400	0.00135078	1.55457	1193700	1277600	1214900	798910	701620	870670
Q9D7J9	enoyl Coenzyme A hydratase domain containing 3	\\sp|Q9D7J9|ECHD3_MOUSE Enoyl-CoA hydratase domain-containing protein 3, mitochondrial OS=Mus musculus OX=10090 GN=Echdc3 PE=1 SV=1\\"\"\"\"\""	Echdc3	1	4	4	32.402	1.57093e+06	1.01056e+06	0.00183646	1.55451	1526200	1533800	1652800	882590	1061400	1087700
A2AFH2	ubiquitin-conjugating enzyme E2D N-terminal like 2	tr|A2AFH2|A2AFH2_MOUSE Similar to ubiquitin-conjugating enzyme E2D 2 OS=Mus musculus OX=10090 GN=Ube2dnl2 PE=3 SV=1	Ube2dnl2	1	2	2	17.537	209777	134957	0.00187646	1.55439	222580	206330	200420	119320	142100	143450
P63005;P63005-2	platelet-activating factor acetylhydrolase, isoform 1b, subunit 1	\\sp|P63005|LIS1_MOUSE Platelet-activating factor acetylhydrolase IB subunit alpha OS=Mus musculus OX=10090 GN=Pafah1b1 PE=1 SV=2;sp|P63005-2|LIS1_MOUSE Isoform of P63005, Isoform 2 of Platelet-activating factor acetylhydrolase IB subunit alpha OS=Mus muscul\\"\"\"\"\""	Pafah1b1	3	21	21	46.67	22227000	14301000	0.0111387	1.55423	22545000	19458000	24678000	12450000	15306000	15147000
Z4YLT8;Q9QYK7	ring finger protein 11	\\tr|Z4YLT8|Z4YLT8_MOUSE Isoform of Q9QYK7, RING finger protein 11 (Fragment) OS=Mus musculus OX=10090 GN=Rnf11 PE=1 SV=1;sp|Q9QYK7|RNF11_MOUSE RING finger protein 11 OS=Mus musculus OX=10090 GN=Rnf11 PE=1 SV=1\\"\"\"\"\""	Rnf11	2	2	2	16.407	2.52523e+06	1.62477e+06	0.00346818	1.55421	2497900	2346400	2731400	1493400	1576500	1804400
Q9D9Q3	RIKEN cDNA 1700034I23 gene	tr|Q9D9Q3|Q9D9Q3_MOUSE RIKEN cDNA 1700034I23 gene OS=Mus musculus OX=10090 GN=1700034I23Rik PE=2 SV=1	1700034I23Rik	1	10	10	20.197	1.63977e+07	10554800	0.00186338	1.55357	16222000	15645000	17326000	9321400	10956000	11387000
Q68EF0;A0A1W2P7K6	RAB3A interacting protein	\\sp|Q68EF0|RAB3I_MOUSE Rab-3A-interacting protein OS=Mus musculus OX=10090 GN=Rab3ip PE=1 SV=1;tr|A0A1W2P7K6|A0A1W2P7K6_MOUSE Isoform of Q68EF0, RAB3A interacting protein, isoform CRA_b OS=Mus musculus OX=10090 GN=Rab3ip PE=1 SV=1\\"\"\"\"\""	Rab3ip	2	7	7	47.133	3.00407e+06	1934500	0.000421386	1.55289	2916200	3010100	3085900	1832900	1864400	2106200
Q9CQ07-2;Q9CQ07;D3Z3F9	leucine rich repeat containing 18	\\sp|Q9CQ07-2|LRC18_MOUSE Isoform of Q9CQ07, Isoform 2 of Leucine-rich repeat-containing protein 18 OS=Mus musculus OX=10090 GN=Lrrc18;sp|Q9CQ07|LRC18_MOUSE Leucine-rich repeat-containing protein 18 OS=Mus musculus OX=10090 GN=Lrrc18 PE=2 SV=1;tr|D3Z3F9|D3Z3\\"\"\"\"\""	Lrrc18	5	3	3	28.731	1.17483e+06	756687	0.000841694	1.5526	1190300	1149300	1184900	718250	706170	845640
Q3UFJ6;G3X923	transmembrane protein 184a	\\sp|Q3UFJ6|T184A_MOUSE Transmembrane protein 184A OS=Mus musculus OX=10090 GN=Tmem184a PE=1 SV=1;tr|G3X923|G3X923_MOUSE Isoform of Q3UFJ6, Transmembrane protein 184A OS=Mus musculus OX=10090 GN=Tmem184a PE=4 SV=1\\"\"\"\"\""	Tmem184a	2	3	3	46.818	219173	141200	0.00327076	1.55221	214750	232240	210530	121590	144630	157380
E9Q2P5;Q3V129-6;Q3V129;E9QKJ7;Q3V129-3	unc-51-like kinase 4	\\tr|E9Q2P5|E9Q2P5_MOUSE Isoform of Q3V129, Serine/threonine-protein kinase ULK4 OS=Mus musculus OX=10090 GN=Ulk4 PE=1 SV=1;sp|Q3V129-6|ULK4_MOUSE Isoform of Q3V129, Isoform 6 of Serine/threonine-protein kinase ULK4 OS=Mus musculus OX=10090 GN=Ulk4;sp|Q3V129\\"\"\"\"\""	Ulk4	9	24	24	142.2	1.20767e+07	7.78233e+06	0.000920094	1.55181	11855000	11657000	12718000	7151100	7785900	8410000
Q60605-2;Q60605;A0A1W2P6F6;A0A1W2P7Q9;A0A1W2P6G5	myosin, light polypeptide 6, alkali, smooth muscle and non-muscle	\\sp|Q60605-2|MYL6_MOUSE Isoform of Q60605, Isoform Smooth muscle of Myosin light polypeptide 6 OS=Mus musculus OX=10090 GN=Myl6;sp|Q60605|MYL6_MOUSE Myosin light polypeptide 6 OS=Mus musculus OX=10090 GN=Myl6 PE=1 SV=3;tr|A0A1W2P6F6|A0A1W2P6F6_MOUSE Isoform\\"\"\"\"\""	Myl6	5	8	7	16.961	4.31167e+06	2778600	0.000614678	1.55174	4263300	4338600	4333100	2488800	2828100	3018900
P58019	CD59b antigen	sp|P58019|CD59B_MOUSE CD59B glycoprotein OS=Mus musculus OX=10090 GN=Cd59b PE=2 SV=2	Cd59b	3	5	5	14.227	4.35143e+06	2.80443e+06	0.00298405	1.55163	4156600	4208900	4688800	2466500	2938800	3008000
Q8BSE0;A0A286YCZ2	regulator of microtubule dynamics 2	\\sp|Q8BSE0|RMD2_MOUSE Regulator of microtubule dynamics protein 2 OS=Mus musculus OX=10090 GN=Rmdn2 PE=1 SV=1;tr|A0A286YCZ2|A0A286YCZ2_MOUSE Isoform of Q8BSE0, Regulator of microtubule dynamics protein 2 (Fragment) OS=Mus musculus OX=10090 GN=Rmdn2 PE=1 SV=\\"\"\"\"\""	Rmdn2	5	12	12	47.016	7.19177e+06	4.63623e+06	0.00275206	1.55121	7233900	6808000	7533400	4033800	4721600	5153300
D3Z220;P97821	cathepsin C	\\tr|D3Z220|D3Z220_MOUSE Isoform of P97821, Dipeptidyl peptidase 1 (Fragment) OS=Mus musculus OX=10090 GN=Ctsc PE=1 SV=1;sp|P97821|CATC_MOUSE Dipeptidyl peptidase 1 OS=Mus musculus OX=10090 GN=Ctsc PE=1 SV=1\\"\"\"\"\""	Ctsc	2	1	1	29.178	322110	208130	0.0146794	1.54763	274320	343530	348480	180380	219610	224400
P08032	spectrin alpha, erythrocytic 1	\\sp|P08032|SPTA1_MOUSE Spectrin alpha chain, erythrocytic 1 OS=Mus musculus OX=10090 GN=Spta1 PE=1 SV=3\\"\"\"\"\""	Spta1	1	25	24	279.86	5.02247e+06	3.24533e+06	0.000903887	1.5476	4920800	4899800	5246800	2957700	3243100	3535200
Q9JHU4	dynein cytoplasmic 1 heavy chain 1	sp|Q9JHU4|DYHC1_MOUSE Cytoplasmic dynein 1 heavy chain 1 OS=Mus musculus OX=10090 GN=Dync1h1 PE=1 SV=2	Dync1h1	2	190	190	532.04	271500000	1.75487e+08	0.00224782	1.54713	263630000	258850000	292020000	158070000	179400000	188990000
Q9DB41-2;Q9DB41	solute carrier family 25 (mitochondrial carrier), member 18	\\sp|Q9DB41-2|GHC2_MOUSE Isoform of Q9DB41, Isoform 2 of Mitochondrial glutamate carrier 2 OS=Mus musculus OX=10090 GN=Slc25a18;sp|Q9DB41|GHC2_MOUSE Mitochondrial glutamate carrier 2 OS=Mus musculus OX=10090 GN=Slc25a18 PE=1 SV=4\\"\"\"\"\""	Slc25a18	2	14	12	33.304	5.24563e+06	3.39287e+06	0.00394863	1.54608	5359400	4823100	5554400	2967200	3508700	3702700
Q9WV32;Q91Z25	actin related protein 2/3 complex, subunit 1B	\\sp|Q9WV32|ARC1B_MOUSE Actin-related protein 2/3 complex subunit 1B OS=Mus musculus OX=10090 GN=Arpc1b PE=1 SV=4;tr|Q91Z25|Q91Z25_MOUSE Isoform of Q9WV32, Actin-related protein 2/3 complex subunit OS=Mus musculus OX=10090 GN=Arpc1b PE=1 SV=1\\"\"\"\"\""	Arpc1b	4	7	7	41.063	3998000	2.58643e+06	0.00105361	1.54576	3881700	3932500	4179800	2367100	2550000	2842200
Q811W1	alanine and arginine rich domain containing protein	sp|Q811W1|AARD_MOUSE Alanine and arginine-rich domain-containing protein OS=Mus musculus OX=10090 GN=Aard PE=2 SV=1	Aard	1	4	4	18.923	1341600	868257	0.000332178	1.54516	1339200	1307600	1378000	837110	827640	940020
Q14DL3-3;Q14DL3-2;Q14DL3	leucine-rich repeats and IQ motif containing 3	\\sp|Q14DL3-3|LRIQ3_MOUSE Isoform of Q14DL3, Isoform 3 of Leucine-rich repeat and IQ domain-containing protein 3 OS=Mus musculus OX=10090 GN=Lrriq3;sp|Q14DL3-2|LRIQ3_MOUSE Isoform of Q14DL3, Isoform 2 of Leucine-rich repeat and IQ domain-containing protein 3\\"\"\"\"\""	Lrriq3	3	1	1	35.363	220633	142793	0.000130687	1.54511	217690	220690	223520	145980	132830	149570
Q60648	GM2 ganglioside activator protein	sp|Q60648|SAP3_MOUSE Ganglioside GM2 activator OS=Mus musculus OX=10090 GN=Gm2a PE=1 SV=2	Gm2a	1	5	5	20.824	1.01836e+07	6.59327e+06	0.00398485	1.54454	9858400	9505300	11187000	6001500	6687700	7090600
B1AYG7;B1AYG6;Q9Z0T9	integrin beta 6	\\tr|B1AYG7|B1AYG7_MOUSE Isoform of Q9Z0T9, Integrin beta (Fragment) OS=Mus musculus OX=10090 GN=Itgb6 PE=1 SV=1;tr|B1AYG6|B1AYG6_MOUSE Isoform of Q9Z0T9, Integrin beta OS=Mus musculus OX=10090 GN=Itgb6 PE=1 SV=1;sp|Q9Z0T9|ITB6_MOUSE Integrin beta-6 OS=Mus m\\"\"\"\"\""	Itgb6	3	1	1	82.521	1.14797e+06	743350	0.00126366	1.54431	1159300	1069000	1215600	692680	759000	778370
Q8BKC5;Q8BKC5-2	importin 5	\\sp|Q8BKC5|IPO5_MOUSE Importin-5 OS=Mus musculus OX=10090 GN=Ipo5 PE=1 SV=3;sp|Q8BKC5-2|IPO5_MOUSE Isoform of Q8BKC5, Isoform 2 of Importin-5 OS=Mus musculus OX=10090 GN=Ipo5\\"\"\"\"\""	Ipo5	3	41	41	123.59	9.66717e+07	6.26133e+07	0.00151032	1.54395	93083000	93632000	103300000	57350000	63129000	67361000
Q99LU0;Q9CQD4	charged multivesicular body protein 1B	sp|Q99LU0|CH1B1_MOUSE Charged multivesicular body protein 1b-1 OS=Mus musculus OX=10090 GN=Chmp1b1 PE=1 SV=1;sp|Q9CQD4|CH1B2_MOUSE Charged multivesicular body protein 1b-2 OS=Mus musculus OX=10090 GN=Chmp1b2 PE=2 SV=2	Chmp1b	2	3	3	22.124	758277	491310	0.00172841	1.54337	766050	707960	800820	451940	489040	532950
G3UXZ5;P97371;G3UXY0;G3UWN9;G3X9K9	proteasome (prosome, macropain) activator subunit 1 (PA28 alpha)	\\tr|G3UXZ5|G3UXZ5_MOUSE Isoform of P97371, Proteasome activator complex subunit 1 (Fragment) OS=Mus musculus OX=10090 GN=Psme1 PE=1 SV=1;sp|P97371|PSME1_MOUSE Proteasome activator complex subunit 1 OS=Mus musculus OX=10090 GN=Psme1 PE=1 SV=2;tr|G3UXY0|G3UXY\\"\"\"\"\""	Psme1	6	9	9	27.411	5.68593e+06	3.68653e+06	0.00561656	1.54235	5762700	5154400	6140700	3331500	3607000	4121100
Q99LJ1	fucosidase, alpha-L- 1, tissue	sp|Q99LJ1|FUCO_MOUSE Tissue alpha-L-fucosidase OS=Mus musculus OX=10090 GN=Fuca1 PE=1 SV=1	Fuca1	1	3	3	52.28	1888900	1.22503e+06	0.00244107	1.54192	1902100	1748400	2016200	1106600	1284800	1283700
Q8R4U7	leucine zipper protein 1	sp|Q8R4U7|LUZP1_MOUSE Leucine zipper protein 1 OS=Mus musculus OX=10090 GN=Luzp1 PE=1 SV=2	Luzp1	2	14	14	119.31	4.26433e+06	2.76587e+06	0.00030885	1.54177	4317300	4147800	4327900	2629700	2674600	2993300
Q9QYR6;Q9QYR6-2;A2ARP8	microtubule-associated protein 1 A	\\sp|Q9QYR6|MAP1A_MOUSE Microtubule-associated protein 1A OS=Mus musculus OX=10090 GN=Map1a PE=1 SV=2;sp|Q9QYR6-2|MAP1A_MOUSE Isoform of Q9QYR6, Isoform 2 of Microtubule-associated protein 1A OS=Mus musculus OX=10090 GN=Map1a;tr|A2ARP8|A2ARP8_MOUSE Isoform o\\"\"\"\"\""	Map1a	3	3	1	300.14	150503	97628.7	0.0196264	1.54157	145830	139280	166400	77961	97455	117470
P35276;D3YWL1;D3YW33	RAB3D, member RAS oncogene family	\\sp|P35276|RAB3D_MOUSE Ras-related protein Rab-3D OS=Mus musculus OX=10090 GN=Rab3d PE=1 SV=1;tr|D3YWL1|D3YWL1_MOUSE Isoform of P35276, Ras-related protein Rab-3D (Fragment) OS=Mus musculus OX=10090 GN=Rab3d PE=1 SV=1;tr|D3YW33|D3YW33_MOUSE Isoform of P3527\\"\"\"\"\""	Rab3d	5	5	3	24.416	1.06383e+06	690580	0.000335542	1.54049	1061000	1044400	1086100	636280	694210	741250
J3QNR9;Q9CQ90;J3QQ03;J3QNC2	RIKEN cDNA 1110059E24 gene	\\tr|J3QNR9|J3QNR9_MOUSE Isoform of Q9CQ90, RIKEN cDNA 1110059E24 gene OS=Mus musculus OX=10090 GN=1110059E24Rik PE=1 SV=1;sp|Q9CQ90|CI085_MOUSE Uncharacterized protein C9orf85 homolog OS=Mus musculus OX=10090 PE=2 SV=1;tr|J3QQ03|J3QQ03_MOUSE Isoform of Q9CQ\\"\"\"\"\""	1110059E24Rik	4	2	2	12.566	384710	249767	0.00184274	1.54027	400890	360380	392860	235750	236550	277000
Q9QUG3;A0A075B668	prion like protein doppel	\\sp|Q9QUG3|PRND_MOUSE Prion-like protein doppel OS=Mus musculus OX=10090 GN=Prnd PE=1 SV=1;tr|A0A075B668|A0A075B668_MOUSE MCG15178, isoform CRA_a OS=Mus musculus OX=10090 GN=Prn PE=3 SV=1\\"\"\"\"\""	Prnd	2	3	3	20.441	2071800	1.34523e+06	0.00251073	1.5401	2022600	2012500	2180300	1167900	1385800	1482000
P24270	catalase	sp|P24270|CATA_MOUSE Catalase OS=Mus musculus OX=10090 GN=Cat PE=1 SV=4	Cat	2	14	14	59.795	4.21023e+06	2.73373e+06	0.00198936	1.5401	4064700	4098300	4467700	2451100	2745300	3004800
P49443;Q9EQE2	protein phosphatase 1A, magnesium dependent, alpha isoform	\\sp|P49443|PPM1A_MOUSE Protein phosphatase 1A OS=Mus musculus OX=10090 GN=Ppm1a PE=1 SV=1;tr|Q9EQE2|Q9EQE2_MOUSE Isoform of P49443, Protein phosphatase 1A OS=Mus musculus OX=10090 GN=Ppm1a PE=1 SV=1\\"\"\"\"\""	Ppm1a	5	18	15	42.432	2.38453e+07	15488000	0.00274696	1.5396	23245000	22541000	25750000	14027000	15602000	16835000
Q8CHH9;Q8CHH9-2;B7ZC46;B1AQY9;B1AQZ0	septin 8	\\sp|Q8CHH9|SEPT8_MOUSE Septin-8 OS=Mus musculus OX=10090 GN=Sept8 PE=1 SV=4;sp|Q8CHH9-2|SEPT8_MOUSE Isoform of Q8CHH9, Isoform 2 of Septin-8 OS=Mus musculus OX=10090 GN=Sept8;tr|B7ZC46|B7ZC46_MOUSE Isoform of Q8CHH9, Septin-8 OS=Mus musculus OX=10090 GN=Sep\\"\"\"\"\""	2019-09-08	5	3	2	49.812	572070	371647	0.00670887	1.53928	577070	507250	631890	342970	382690	389280
P61222	ATP-binding cassette, sub-family E (OABP), member 1	sp|P61222|ABCE1_MOUSE ATP-binding cassette sub-family E member 1 OS=Mus musculus OX=10090 GN=Abce1 PE=1 SV=1	Abce1	1	16	16	67.314	1.20983e+07	7.86317e+06	0.00131219	1.53861	11680000	11910000	12705000	7029400	8118100	8442000
P05213;A0A2R8VHF3	tubulin, alpha 1B	sp|P05213|TBA1B_MOUSE Tubulin alpha-1B chain OS=Mus musculus OX=10090 GN=Tuba1b PE=1 SV=2;tr|A0A2R8VHF3|A0A2R8VHF3_MOUSE Tubulin alpha chain (Fragment) OS=Mus musculus OX=10090 PE=3 SV=1	Tuba1b	2	20	0	50.151	106400	69186.3	0.00705376	1.53785	102550	106600	110050	62837	61576	83146
P50427	steroid sulfatase	sp|P50427|STS_MOUSE Steryl-sulfatase OS=Mus musculus OX=10090 GN=Sts PE=1 SV=1	Sts	1	13	13	66.59	7.43457e+06	4.83647e+06	0.00124247	1.53719	7534500	7046800	7722400	4366500	4934400	5208500
Q8K299	scavenger receptor class A, member 5	sp|Q8K299|SCAR5_MOUSE Scavenger receptor class A member 5 OS=Mus musculus OX=10090 GN=Scara5 PE=1 SV=1	Scara5	3	8	8	53.666	2027600	1319300	0.00145851	1.53687	2034400	2082600	1965800	1157900	1358000	1442000
Q3V157;P42228	signal transducer and activator of transcription 4	\\tr|Q3V157|Q3V157_MOUSE Isoform of P42228, Signal transducer and activator of transcription OS=Mus musculus OX=10090 GN=Stat4 PE=1 SV=1;sp|P42228|STAT4_MOUSE Signal transducer and activator of transcription 4 OS=Mus musculus OX=10090 GN=Stat4 PE=1 SV=1\\"\"\"\"\""	Stat4	2	28	28	85.853	3.07407e+07	20006000	0.0013398	1.53657	30126000	29629000	32467000	18045000	20482000	21491000
A0A0N4SW73;Q8R361	RAB11 family interacting protein 5 (class I)	\\tr|A0A0N4SW73|A0A0N4SW73_MOUSE Isoform of Q8R361, Rab11 family-interacting protein 5 OS=Mus musculus OX=10090 GN=Rab11fip5 PE=1 SV=1;sp|Q8R361|RFIP5_MOUSE Rab11 family-interacting protein 5 OS=Mus musculus OX=10090 GN=Rab11fip5 PE=1 SV=2\\"\"\"\"\""	Rab11fip5	2	24	24	139.55	6.91147e+06	4.49903e+06	0.00140065	1.53621	6987500	6625600	7121300	3968600	4699200	4829300
Q8CF27	family with sequence similarity 24, member A	sp|Q8CF27|FA24A_MOUSE Protein FAM24A OS=Mus musculus OX=10090 GN=Fam24a PE=3 SV=1	Fam24a	1	5	5	10.857	8885800	5.78617e+06	0.00401359	1.5357	8224300	9602200	8830900	5158200	5893700	6306600
B2KF54;Q3TT38;B2KF52	DNA segment, Chr 17, Wayne State University 92, expressed;inflammation and lipid regulator with UBA-like and NBR1-like domains	\\tr|B2KF54|B2KF54_MOUSE Isoform of Q3TT38, DNA segment, Chr 17, Wayne State University 92, expressed OS=Mus musculus OX=10090 GN=D17Wsu92e PE=1 SV=1;sp|Q3TT38|CF106_MOUSE Uncharacterized protein C6orf106 homolog OS=Mus musculus OX=10090 GN=D17Wsu92e PE=2 SV\\"\"\"\"\""	D17Wsu92e;Ilrun	3	2	2	23.929	269050	175203	0.0002231	1.53564	265250	274290	267610	167750	168890	188970
P26645	myristoylated alanine rich protein kinase C substrate	sp|P26645|MARCS_MOUSE Myristoylated alanine-rich C-kinase substrate OS=Mus musculus OX=10090 GN=Marcks PE=1 SV=2	Marcks	1	4	4	29.661	2.22827e+06	1451100	0.00746897	1.53557	2241500	2064500	2378800	1199400	1581300	1572600
Q8VDV3-2;Q8VDV3;D3Z585	RAB3A interacting protein (rabin3)-like 1	\\sp|Q8VDV3-2|R3GEF_MOUSE Isoform of Q8VDV3, Isoform 2 of Guanine nucleotide exchange factor for Rab-3A OS=Mus musculus OX=10090 GN=Rab3il1;sp|Q8VDV3|R3GEF_MOUSE Guanine nucleotide exchange factor for Rab-3A OS=Mus musculus OX=10090 GN=Rab3il1 PE=1 SV=1;tr|D\\"\"\"\"\""	Rab3il1	3	5	5	35.419	1333300	868527	0.00899924	1.53513	1219900	1491300	1288700	827690	801670	976220
P18293	natriuretic peptide receptor 1	sp|P18293|ANPRA_MOUSE Atrial natriuretic peptide receptor 1 OS=Mus musculus OX=10090 GN=Npr1 PE=1 SV=2	Npr1	5	10	10	119.11	1.59473e+06	1038940	0.00101072	1.53496	1605800	1520400	1658000	962820	1018700	1135300
H9KV17;Q9CZW6	ring finger protein 146	\\tr|H9KV17|H9KV17_MOUSE Isoform of Q9CZW6, E3 ubiquitin-protein ligase RNF146 (Fragment) OS=Mus musculus OX=10090 GN=Rnf146 PE=1 SV=1;sp|Q9CZW6|RN146_MOUSE E3 ubiquitin-protein ligase RNF146 OS=Mus musculus OX=10090 GN=Rnf146 PE=1 SV=2\\"\"\"\"\""	Rnf146	2	2	2	24.753	1283800	837620	0.000834052	1.53267	1250500	1268100	1332800	758230	850420	904210
P28653	biglycan	sp|P28653|PGS1_MOUSE Biglycan OS=Mus musculus OX=10090 GN=Bgn PE=1 SV=1	Bgn	1	4	3	41.639	3.95347e+06	2.57993e+06	0.00109801	1.53239	3741800	4017100	4101500	2345600	2637100	2757100
Q8CH19	casein kinase 2, alpha prime interacting protein	sp|Q8CH19|CS2IP_MOUSE Casein kinase II subunit alpha-interacting protein OS=Mus musculus OX=10090 GN=Csnka2ip PE=1 SV=2	Csnka2ip	2	13	13	79.204	3708500	2.42027e+06	0.000659336	1.53227	3681100	3627600	3816800	2200600	2438600	2621600
S4R2P6;Q9DA97	septin 14	\\tr|S4R2P6|S4R2P6_MOUSE Isoform of Q9DA97, Septin-14 OS=Mus musculus OX=10090 GN=Sept14 PE=1 SV=1;sp|Q9DA97|SEP14_MOUSE Septin-14 OS=Mus musculus OX=10090 GN=Sept14 PE=1 SV=3\\"\"\"\"\""	2019-09-14	2	6	5	49.681	3641800	2377500	0.000740389	1.53178	3707600	3465600	3752200	2194600	2388700	2549200
Q9Z1G4-3;K3W4T3;Q9Z1G4-2;Q9Z1G4	ATPase, H+ transporting, lysosomal V0 subunit A1	\\sp|Q9Z1G4-3|VPP1_MOUSE Isoform of Q9Z1G4, Isoform A1-III of V-type proton ATPase 116 kDa subunit a isoform 1 OS=Mus musculus OX=10090 GN=Atp6v0a1;tr|K3W4T3|K3W4T3_MOUSE Isoform of Q9Z1G4, V-type proton ATPase subunit a OS=Mus musculus OX=10090 GN=Atp6v0a1 \\"\"\"\"\""	Atp6v0a1	6	16	15	95.622	8.88123e+06	5.79907e+06	0.00127728	1.53149	8868000	8513500	9262200	5375000	5608800	6413400
P45376;D3YVJ7	aldo-keto reductase family 1, member B3 (aldose reductase)	\\sp|P45376|ALDR_MOUSE Aldose reductase OS=Mus musculus OX=10090 GN=Akr1b1 PE=1 SV=3;tr|D3YVJ7|D3YVJ7_MOUSE Isoform of P45376, Aldo-keto reductase family 1, member B3 (aldose reductase) (Fragment) OS=Mus musculus OX=10090 GN=Akr1b3 PE=1 SV=1\\"\"\"\"\""	Akr1b3	2	17	17	35.732	30139000	19680000	0.00210853	1.53145	29592000	28609000	32216000	17801000	19960000	21279000
A0A0R4J2B2;Q6WVG3;Q8C7J6	potassium channel tetramerisation domain containing 12	\\tr|A0A0R4J2B2|A0A0R4J2B2_MOUSE Isoform of Q6WVG3, BTB/POZ domain-containing protein KCTD12 OS=Mus musculus OX=10090 GN=Kctd12 PE=1 SV=1;sp|Q6WVG3|KCD12_MOUSE BTB/POZ domain-containing protein KCTD12 OS=Mus musculus OX=10090 GN=Kctd12 PE=1 SV=1;tr|Q8C7J6|Q8\\"\"\"\"\""	Kctd12	3	2	2	35.888	479253	312953	0.000913526	1.53138	448680	504000	485080	294820	316510	327530
Q8K4D7;Q8K4D7-2	phospholipase C, zeta 1	\\sp|Q8K4D7|PLCZ1_MOUSE 1-phosphatidylinositol 4,5-bisphosphate phosphodiesterase zeta-1 OS=Mus musculus OX=10090 GN=Plcz1 PE=1 SV=1;sp|Q8K4D7-2|PLCZ1_MOUSE Isoform of Q8K4D7, Isoform 2 of 1-phosphatidylinositol 4,5-bisphosphate phosphodiesterase zeta-1 OS=M\\"\"\"\"\""	Plcz1	4	9	9	74.613	2.55103e+06	1.66767e+06	0.00102821	1.5297	2494000	2484100	2675000	1540900	1639200	1822900
Q8BVR0	barrier to autointegration factor 2	sp|Q8BVR0|BAFL_MOUSE Barrier-to-autointegration factor-like protein OS=Mus musculus OX=10090 GN=Banf2 PE=1 SV=1	Banf2	1	6	6	10.267	4572100	2989900	0.00466747	1.52918	4552200	4244200	4919900	2609800	3090700	3269200
P40240	CD9 antigen	sp|P40240|CD9_MOUSE CD9 antigen OS=Mus musculus OX=10090 GN=Cd9 PE=1 SV=2	Cd9	1	3	3	25.258	3.31633e+06	2168700	0.00220587	1.52918	3167100	3258400	3523500	1939400	2198500	2368200
Q9QXU7	prokineticin 2	sp|Q9QXU7|PROK2_MOUSE Prokineticin-2 OS=Mus musculus OX=10090 GN=Prok2 PE=2 SV=1	Prok2	1	2	1	14.185	1.16983e+06	765137	0.00586023	1.52892	1289200	1047400	1172900	716390	762700	816320
Q9JHJ0;A0A1L1SQ12;A0A1L1SR42	tropomodulin 3	\\sp|Q9JHJ0|TMOD3_MOUSE Tropomodulin-3 OS=Mus musculus OX=10090 GN=Tmod3 PE=1 SV=1;tr|A0A1L1SQ12|A0A1L1SQ12_MOUSE Isoform of Q9JHJ0, Tropomodulin-3 OS=Mus musculus OX=10090 GN=Tmod3 PE=1 SV=1;tr|A0A1L1SR42|A0A1L1SR42_MOUSE Isoform of Q9JHJ0, Tropomodulin-3 (\\"\"\"\"\""	Tmod3	3	8	8	39.502	2964200	1.93903e+06	0.00077843	1.5287	2866100	2920700	3105800	1825600	1886700	2104800
A2A9Q2;Q8BHG1;A6PWC3	nardilysin, N-arginine dibasic convertase, NRD convertase 1	\\tr|A2A9Q2|A2A9Q2_MOUSE Isoform of Q8BHG1, Nardilysin, N-arginine dibasic convertase, NRD convertase 1 OS=Mus musculus OX=10090 GN=Nrd1 PE=1 SV=1;sp|Q8BHG1|NRDC_MOUSE Nardilysin OS=Mus musculus OX=10090 GN=Nrdc PE=1 SV=1;tr|A6PWC3|A6PWC3_MOUSE Isoform of Q8\\"\"\"\"\""	Nrd1	4	34	34	140.62	1.89957e+07	1.24297e+07	0.00200907	1.52825	18963000	17915000	20109000	11130000	12859000	13300000
Q8C632;A0A087WQK2;A0A087WSK1	DnaJ heat shock protein family (Hsp40) member C5 gamma	\\tr|Q8C632|Q8C632_MOUSE DnaJ (Hsp40) homolog, subfamily C, member 5 gamma OS=Mus musculus OX=10090 GN=Dnajc5g PE=2 SV=1;tr|A0A087WQK2|A0A087WQK2_MOUSE Isoform of Q8C632, DnaJ heat shock protein family (Hsp40) member C5 gamma OS=Mus musculus OX=10090 GN=Dnaj\\"\"\"\"\""	Dnajc5g	3	4	4	18.716	3959700	2.59257e+06	0.0174083	1.52733	3908000	3463400	4507700	2297100	2576500	2904100
Q8K4X7	1-acylglycerol-3-phosphate O-acyltransferase 4 (lysophosphatidic acid acyltransferase, delta)	sp|Q8K4X7|PLCD_MOUSE 1-acyl-sn-glycerol-3-phosphate acyltransferase delta OS=Mus musculus OX=10090 GN=Agpat4 PE=1 SV=1	Agpat4	3	14	14	43.81	7.11427e+06	4.65873e+06	0.00137856	1.52708	7242700	6777900	7322200	4217100	4642900	5116200
Q3UTJ2-3;Q3UTJ2-4;A0A0R4J1W0;B2RXQ9;D3Z080;Q3UTJ2-5;Z4YJR7;A0A0R4J1T1;Q3UTJ2;B7ZWM6;B9EKP8;Q3UTJ2-2;A0A0R4J1X5;F6V513	sorbin and SH3 domain containing 2	\\sp|Q3UTJ2-3|SRBS2_MOUSE Isoform of Q3UTJ2, Isoform 3 of Sorbin and SH3 domain-containing protein 2 OS=Mus musculus OX=10090 GN=Sorbs2;sp|Q3UTJ2-4|SRBS2_MOUSE Isoform of Q3UTJ2, Isoform 4 of Sorbin and SH3 domain-containing protein 2 OS=Mus musculus OX=1009\\"\"\"\"\""	Sorbs2	19	7	7	64.989	1.25573e+06	822483	0.000890142	1.52676	1274300	1229700	1263200	778120	773020	916310
A0A1L1SRN0;Q9R1Z7	6-pyruvoyl-tetrahydropterin synthase	\\tr|A0A1L1SRN0|A0A1L1SRN0_MOUSE Isoform of Q9R1Z7, 6-pyruvoyl tetrahydrobiopterin synthase OS=Mus musculus OX=10090 GN=Pts PE=1 SV=1;sp|Q9R1Z7|PTPS_MOUSE 6-pyruvoyl tetrahydrobiopterin synthase OS=Mus musculus OX=10090 GN=Pts PE=1 SV=2\\"\"\"\"\""	Pts	2	1	1	8.8551	126567	82911.7	0.00085693	1.52651	118540	128660	132500	87957	80620	80158
E9QM22;Q9D565-3;A0A0A6YWX3;Q9D565;Q9D565-2	WD repeat domain 64	\\tr|E9QM22|E9QM22_MOUSE Isoform of Q9D565, WD repeat-containing protein 64 OS=Mus musculus OX=10090 GN=Wdr64 PE=4 SV=1;sp|Q9D565-3|WDR64_MOUSE Isoform of Q9D565, Isoform 3 of WD repeat-containing protein 64 OS=Mus musculus OX=10090 GN=Wdr64;tr|A0A0A6YWX3|A0\\"\"\"\"\""	Wdr64	6	19	19	123.62	5.32157e+06	3.48617e+06	0.00361872	1.52648	5592000	4840700	5532000	3171500	3496600	3790400
Q9D273;Q9D273-2;D3Z1G7	methylmalonic aciduria (cobalamin deficiency) cblB type homolog (human)	\\sp|Q9D273|MMAB_MOUSE Cob(I)yrinic acid a,c-diamide adenosyltransferase, mitochondrial OS=Mus musculus OX=10090 GN=Mmab PE=1 SV=1;sp|Q9D273-2|MMAB_MOUSE Isoform of Q9D273, Isoform 2 of Cob(I)yrinic acid a,c-diamide adenosyltransferase, mitochondrial OS=Mus \\"\"\"\"\""	Mmab	3	4	4	26.273	912543	598287	0.0207107	1.52526	789750	1051400	896480	611010	527650	656200
O08715;O08715-4;O08715-2;O08715-3;O08715-6	A kinase (PRKA) anchor protein 1	\\sp|O08715|AKAP1_MOUSE A-kinase anchor protein 1, mitochondrial OS=Mus musculus OX=10090 GN=Akap1 PE=1 SV=4;sp|O08715-4|AKAP1_MOUSE Isoform of O08715, Isoform 4 of A-kinase anchor protein 1, mitochondrial OS=Mus musculus OX=10090 GN=Akap1;sp|O08715-2|AKAP1_\\"\"\"\"\""	Akap1	5	20	2	92.194	17408000	1.14217e+07	0.00565551	1.52411	17465000	15999000	18760000	9892200	12083000	12290000
Q921E2;Q3TXV4	RAB31, member RAS oncogene family	\\sp|Q921E2|RAB31_MOUSE Ras-related protein Rab-31 OS=Mus musculus OX=10090 GN=Rab31 PE=1 SV=1;tr|Q3TXV4|Q3TXV4_MOUSE Isoform of Q921E2, Rab22B OS=Mus musculus OX=10090 GN=Rab31 PE=1 SV=1\\"\"\"\"\""	Rab31	2	6	4	21.331	3364400	2.20813e+06	0.00179447	1.52364	3269400	3258500	3565300	1968200	2317600	2338600
P16460	argininosuccinate synthetase 1	sp|P16460|ASSY_MOUSE Argininosuccinate synthase OS=Mus musculus OX=10090 GN=Ass1 PE=1 SV=1	Ass1	1	7	7	46.584	3.84973e+06	2.52743e+06	0.00384599	1.52318	3765800	3743000	4040400	2287900	2374200	2920200
A0A2I3BQE0;Q9JI10;Q9JI10-2	serine/threonine kinase 3	\\tr|A0A2I3BQE0|A0A2I3BQE0_MOUSE Isoform of Q9JI10, Serine/threonine-protein kinase 3 OS=Mus musculus OX=10090 GN=Stk3 PE=1 SV=1;sp|Q9JI10|STK3_MOUSE Serine/threonine-protein kinase 3 OS=Mus musculus OX=10090 GN=Stk3 PE=1 SV=1;sp|Q9JI10-2|STK3_MOUSE Isoform \\"\"\"\"\""	Stk3	3	3	2	56.673	437723	287440	0.00205809	1.52283	453120	428110	431940	248500	302630	311190
Q9D9Q6;Q8BL82	calreticulin 3	\\sp|Q9D9Q6|CALR3_MOUSE Calreticulin-3 OS=Mus musculus OX=10090 GN=Calr3 PE=1 SV=2;tr|Q8BL82|Q8BL82_MOUSE Isoform of Q9D9Q6, Calreticulin-3 OS=Mus musculus OX=10090 GN=Calr3 PE=1 SV=1\\"\"\"\"\""	Calr3	2	23	23	44.231	1.06483e+08	7.00037e+07	0.00209173	1.52111	103700000	101990000	113760000	64094000	69377000	76540000
P26443	glutamate dehydrogenase 1	\\sp|P26443|DHE3_MOUSE Glutamate dehydrogenase 1, mitochondrial OS=Mus musculus OX=10090 GN=Glud1 PE=1 SV=1\\"\"\"\"\""	Glud1	2	19	19	61.336	3.22647e+07	2.12133e+07	0.00148986	1.52096	33482000	31471000	31841000	18737000	21862000	23041000
A0A2R8VHF9;E9QPE7;O08638-2;O08638	myosin, heavy polypeptide 11, smooth muscle	\\tr|A0A2R8VHF9|A0A2R8VHF9_MOUSE Isoform of O08638, Myosin-11 OS=Mus musculus OX=10090 GN=Myh11 PE=1 SV=1;tr|E9QPE7|E9QPE7_MOUSE Isoform of O08638, Myosin-11 OS=Mus musculus OX=10090 GN=Myh11 PE=1 SV=2;sp|O08638-2|MYH11_MOUSE Isoform of O08638, Isoform 2 of \\"\"\"\"\""	Myh11	4	37	19	223.35	3688600	2.42523e+06	0.00072762	1.52093	3605000	3689100	3771700	2242000	2366500	2667200
Q3V0F0	RIMS binding protein 3	sp|Q3V0F0|RIMB3_MOUSE RIMS-binding protein 3 OS=Mus musculus OX=10090 GN=Rimbp3 PE=1 SV=2	Rimbp3	1	70	70	177.28	94844000	62371000	0.00131809	1.52064	92283000	92660000	99589000	56433000	62901000	67779000
Q9WTQ5;Q9WTQ5-2	A kinase (PRKA) anchor protein (gravin) 12	\\sp|Q9WTQ5|AKA12_MOUSE A-kinase anchor protein 12 OS=Mus musculus OX=10090 GN=Akap12 PE=1 SV=1;sp|Q9WTQ5-2|AKA12_MOUSE Isoform of Q9WTQ5, Isoform 2 of A-kinase anchor protein 12 OS=Mus musculus OX=10090 GN=Akap12\\"\"\"\"\""	Akap12	2	44	44	180.69	3.84513e+07	25294000	0.00147934	1.52018	38253000	36549000	40552000	23228000	25158000	27496000
Q9WVJ2;E9Q5I9;E9Q0U1	proteasome (prosome, macropain) 26S subunit, non-ATPase, 13	\\sp|Q9WVJ2|PSD13_MOUSE 26S proteasome non-ATPase regulatory subunit 13 OS=Mus musculus OX=10090 GN=Psmd13 PE=1 SV=1;tr|E9Q5I9|E9Q5I9_MOUSE Isoform of Q9WVJ2, 26S proteasome non-ATPase regulatory subunit 13 OS=Mus musculus OX=10090 GN=Psmd13 PE=1 SV=1;tr|E9Q\\"\"\"\"\""	Psmd13	6	18	18	42.809	12817000	8.43807e+06	0.00212115	1.51895	12856000	11980000	13615000	7712400	8502300	9099500
F6RIS8;Q9QZS0	collagen, type IV, alpha 3	\\tr|F6RIS8|F6RIS8_MOUSE Isoform of Q9QZS0, Collagen alpha-3(IV) chain (Fragment) OS=Mus musculus OX=10090 GN=Col4a3 PE=1 SV=1;sp|Q9QZS0|CO4A3_MOUSE Collagen alpha-3(IV) chain OS=Mus musculus OX=10090 GN=Col4a3 PE=1 SV=2\\"\"\"\"\""	Col4a3	2	2	2	22.381	3.28797e+06	2164800	0.009172	1.51883	3389700	3100600	3373600	1727900	2365300	2401200
Q6IMH7	a disintegrin and metallopeptidase domain 6B	tr|Q6IMH7|Q6IMH7_MOUSE A disintegrin and metallopeptidase domain 6B OS=Mus musculus OX=10090 GN=Adam6b PE=4 SV=1	Adam6b	1	19	12	85.35	7.64903e+06	5.04013e+06	0.00079657	1.51762	7626200	7395700	7925200	4574900	5164000	5381500
Q3UHB1;A0A1W2P799	5'-nucleotidase domain containing 3	sp|Q3UHB1|NT5D3_MOUSE 5-nucleotidase domain-containing protein 3 OS=Mus musculus OX=10090 GN=Nt5dc3 PE=1 SV=1;tr|A0A1W2P799|A0A1W2P799_MOUSE Uncharacterized protein (Fragment) OS=Mus musculus OX=10090 GN=Gm49358 PE=4 SV=1	Nt5dc3	2	4	4	63.17	871717	574953	0.000958177	1.51615	905120	886400	823630	533130	577120	614610
Q8C0M2;Q8VD66;Q3U7M5;A0A0G2JEC8	abhydrolase domain containing 4	\\tr|Q8C0M2|Q8C0M2_MOUSE Isoform of Q8VD66, Protein ABHD4 OS=Mus musculus OX=10090 GN=Abhd4 PE=1 SV=1;sp|Q8VD66|ABHD4_MOUSE Protein ABHD4 OS=Mus musculus OX=10090 GN=Abhd4 PE=1 SV=1;tr|Q3U7M5|Q3U7M5_MOUSE Isoform of Q8VD66, Protein ABHD4 OS=Mus musculus OX=1\\"\"\"\"\""	Abhd4	6	6	2	36.048	930523	613853	0.000312434	1.51587	920860	932780	937930	563750	622630	655180
F7BE40;Q6IMB2	ADP-ribosylation factor-like 9	\\tr|F7BE40|F7BE40_MOUSE ADP-ribosylation factor-like 9 (Fragment) OS=Mus musculus OX=10090 GN=Arl9 PE=3 SV=1;tr|Q6IMB2|Q6IMB2_MOUSE Isoform of F7BE40, ADP-ribosylation factor-like 9 OS=Mus musculus OX=10090 GN=Arl9 PE=2 SV=1\\"\"\"\"\""	Arl9	2	2	2	19.04	895543	590807	0.0227637	1.5158	933580	756750	996300	502300	648970	621150
Q9CYD3	cartilage associated protein	sp|Q9CYD3|CRTAP_MOUSE Cartilage-associated protein OS=Mus musculus OX=10090 GN=Crtap PE=1 SV=3	Crtap	1	6	6	46.169	1024000	675630	0.00221332	1.51562	992590	1086700	992710	600730	695400	730760
D3Z3F8;Q8R1X6;Q8R1X6-2	spastic paraplegia 20, spartin (Troyer syndrome) homolog (human)	\\tr|D3Z3F8|D3Z3F8_MOUSE Isoform of Q8R1X6, Spastic paraplegia 20, spartin (Troyer syndrome) homolog (human) OS=Mus musculus OX=10090 GN=Spg20 PE=1 SV=1;sp|Q8R1X6|SPART_MOUSE Spartin OS=Mus musculus OX=10090 GN=Spart PE=1 SV=1;sp|Q8R1X6-2|SPART_MOUSE Isoform\\"\"\"\"\""	Spg20	5	11	11	63.079	4.77727e+06	3152100	0.00371192	1.51558	4822100	4399300	5110400	2825400	3233000	3397900
C0HKD3;C0HKD2;C0HKD1	Mus musculus family with sequence similarity 205, member A2 (Fam205a2), transcript variant 2, mRNA.;family with sequence similarity 205, member A4;family with sequence similarity 205, member A3;family with sequence similarity 205, member A2	sp|C0HKD3|F25A4_MOUSE Protein FAM205A-4 OS=Mus musculus OX=10090 GN=Fam205a4 PE=3 SV=1;sp|C0HKD2|F25A3_MOUSE Protein FAM205A-3 OS=Mus musculus OX=10090 GN=Fam205a3 PE=3 SV=1;sp|C0HKD1|F25A2_MOUSE Protein FAM205A-2 OS=Mus musculus OX=10090 GN=Fam205a2 PE=3	Fam205a4;Fam205a3;Fam205a2	3	30	3	146.15	401657	265020	0.00419402	1.51557	447230	377280	380460	259300	261710	274050
Q9R112;F6ZKZ3	sulfide quinone oxidoreductase	\\sp|Q9R112|SQOR_MOUSE Sulfide:quinone oxidoreductase, mitochondrial OS=Mus musculus OX=10090 GN=Sqor PE=1 SV=3;tr|F6ZKZ3|F6ZKZ3_MOUSE Isoform of Q9R112, Sulfide:quinone oxidoreductase, mitochondrial OS=Mus musculus OX=10090 GN=Sqor PE=1 SV=1\\"\"\"\"\""	Sqor	3	25	25	50.282	2.01783e+07	1.33263e+07	0.00222678	1.51417	20116000	19055000	21364000	11894000	13887000	14198000
Q3TXN1;Q8VDQ1-2;Q8VDQ1	prostaglandin reductase 2	\\tr|Q3TXN1|Q3TXN1_MOUSE Isoform of Q8VDQ1, Prostaglandin reductase 2 OS=Mus musculus OX=10090 GN=Ptgr2 PE=1 SV=1;sp|Q8VDQ1-2|PTGR2_MOUSE Isoform of Q8VDQ1, Isoform 2 of Prostaglandin reductase 2 OS=Mus musculus OX=10090 GN=Ptgr2;sp|Q8VDQ1|PTGR2_MOUSE Prosta\\"\"\"\"\""	Ptgr2	4	4	4	34.268	7537600	4.97963e+06	0.00315882	1.51369	7377800	7093200	8141800	4523400	5014600	5400900
P40142;A0A286YE28	transketolase	\\sp|P40142|TKT_MOUSE Transketolase OS=Mus musculus OX=10090 GN=Tkt PE=1 SV=1;tr|A0A286YE28|A0A286YE28_MOUSE Isoform of P40142, Transketolase (Fragment) OS=Mus musculus OX=10090 GN=Tkt PE=1 SV=1\\"\"\"\"\""	Tkt	3	13	13	67.63	7.60423e+06	5.02367e+06	0.00106693	1.51368	7831900	7899200	7081600	5096100	4725100	5249800
E9Q8J5	predicted gene 597	tr|E9Q8J5|E9Q8J5_MOUSE Uncharacterized protein OS=Mus musculus OX=10090 GN=Gm597 PE=1 SV=1	Gm597	1	29	28	100.1	1.13207e+07	7.48113e+06	0.00137773	1.51323	10995000	11061000	11906000	6818800	7467900	8156700
Q3UV95;P49222	erythrocyte membrane protein band 4.2	\\tr|Q3UV95|Q3UV95_MOUSE Isoform of P49222, Erythrocyte membrane protein band 4.2 OS=Mus musculus OX=10090 GN=Epb42 PE=1 SV=1;sp|P49222|EPB42_MOUSE Erythrocyte membrane protein band 4.2 OS=Mus musculus OX=10090 GN=Epb42 PE=1 SV=3\\"\"\"\"\""	Epb42	2	5	4	74.866	489393	323440	0.000559443	1.51308	482120	493760	492300	292500	330780	347040
Q8VDG5;Q8VDG5-2	phosphopantothenoylcysteine synthetase	\\sp|Q8VDG5|PPCS_MOUSE Phosphopantothenate--cysteine ligase OS=Mus musculus OX=10090 GN=Ppcs PE=1 SV=1;sp|Q8VDG5-2|PPCS_MOUSE Isoform of Q8VDG5, Isoform 2 of Phosphopantothenate--cysteine ligase OS=Mus musculus OX=10090 GN=Ppcs\\"\"\"\"\""	Ppcs	2	3	3	33.794	409097	270470	0.00216162	1.51253	411370	379660	436260	248500	280440	282470
Q9D9D3;A0A1L1STB7	TBC1 domain family, member 21	\\sp|Q9D9D3|TBC21_MOUSE TBC1 domain family member 21 OS=Mus musculus OX=10090 GN=Tbc1d21 PE=1 SV=1;tr|A0A1L1STB7|A0A1L1STB7_MOUSE Isoform of Q9D9D3, TBC1 domain family member 21 OS=Mus musculus OX=10090 GN=Tbc1d21 PE=4 SV=1\\"\"\"\"\""	Tbc1d21	2	19	19	39.261	2.01083e+07	1.33027e+07	0.000705866	1.5116	20081000	19528000	20716000	12197000	13314000	14397000
F6TCF9;A0A1L1SRT0;Q60739;Q60739-2	BCL2-associated athanogene 1	\\tr|F6TCF9|F6TCF9_MOUSE Isoform of Q60739, BAG family molecular chaperone regulator 1 OS=Mus musculus OX=10090 GN=Bag1 PE=1 SV=1;tr|A0A1L1SRT0|A0A1L1SRT0_MOUSE Isoform of Q60739, BAG family molecular chaperone regulator 1 OS=Mus musculus OX=10090 GN=Bag1 PE\\"\"\"\"\""	Bag1	4	15	15	39.696	1.26293e+07	8359900	0.000934838	1.5107	12253000	12584000	13051000	7722600	8181800	9175300
Q8BH95	enoyl Coenzyme A hydratase, short chain, 1, mitochondrial	\\sp|Q8BH95|ECHM_MOUSE Enoyl-CoA hydratase, mitochondrial OS=Mus musculus OX=10090 GN=Echs1 PE=1 SV=1\\"\"\"\"\""	Echs1	1	16	16	31.474	18253000	12083000	0.00492006	1.51063	18076000	17088000	19595000	10445000	12827000	12977000
G3UZ30;A5A4Y9;Q8K1L5	protein phosphatase 1, regulatory inhibitor subunit 11	\\tr|G3UZ30|G3UZ30_MOUSE Isoform of Q8K1L5, E3 ubiquitin-protein ligase PPP1R11 (Fragment) OS=Mus musculus OX=10090 GN=Ppp1r11 PE=1 SV=2;tr|A5A4Y9|A5A4Y9_MOUSE Isoform of Q8K1L5, E3 ubiquitin-protein ligase PPP1R11 OS=Mus musculus OX=10090 GN=Ppp1r11 PE=1 SV\\"\"\"\"\""	Ppp1r11	3	5	5	13.836	5169900	3.42327e+06	0.00351048	1.51022	4997900	5021600	5490200	2961200	3595600	3713000
Q8VCH7	retinol dehydrogenase 10 (all-trans)	sp|Q8VCH7|RDH10_MOUSE Retinol dehydrogenase 10 OS=Mus musculus OX=10090 GN=Rdh10 PE=1 SV=2	Rdh10	1	2	2	38.075	200370	132697	0.00062325	1.50997	200610	210600	189900	129340	128960	139790
Q99LG0;D3YVU1	ubiquitin specific peptidase 16	\\sp|Q99LG0|UBP16_MOUSE Ubiquitin carboxyl-terminal hydrolase 16 OS=Mus musculus OX=10090 GN=Usp16 PE=1 SV=2;tr|D3YVU1|D3YVU1_MOUSE Isoform of Q99LG0, Ubiquitinyl hydrolase 1 OS=Mus musculus OX=10090 GN=Usp16 PE=1 SV=1\\"\"\"\"\""	Usp16	4	16	16	93.433	8.15323e+06	5.40337e+06	0.000862114	1.50892	8007000	7958700	8494000	4946700	5433900	5829500
E9PXT9	family with sequence similarity 170, member B	sp|E9PXT9|F170B_MOUSE Protein FAM170B OS=Mus musculus OX=10090 GN=Fam170b PE=1 SV=1	Fam170b	1	9	9	43.766	3915000	2594800	0.0180368	1.50879	3851200	3457800	4436000	2365000	2449400	2970000
Q8CJ19;Q8CJ19-3;Q8CJ19-2;A0A0N4SWA5;A0A0N4SVV2	microtubule associated monooxygenase, calponin and LIM domain containing 3	\\sp|Q8CJ19|MICA3_MOUSE [F-actin]-monooxygenase MICAL3 OS=Mus musculus OX=10090 GN=Mical3 PE=1 SV=2;sp|Q8CJ19-3|MICA3_MOUSE Isoform of Q8CJ19, Isoform 3 of [F-actin]-monooxygenase MICAL3 OS=Mus musculus OX=10090 GN=Mical3;sp|Q8CJ19-2|MICA3_MOUSE Isoform of Q\\"\"\"\"\""	Mical3	12	10	9	223.72	1.67217e+06	1.10953e+06	0.00133409	1.50709	1654100	1637100	1725300	1004000	1096300	1228300
Q9CRC9-2;Q9CRC9;D3YWR1	glucosamine-6-phosphate deaminase 2	\\sp|Q9CRC9-2|GNPI2_MOUSE Isoform of Q9CRC9, Isoform 2 of Glucosamine-6-phosphate isomerase 2 OS=Mus musculus OX=10090 GN=Gnpda2;sp|Q9CRC9|GNPI2_MOUSE Glucosamine-6-phosphate isomerase 2 OS=Mus musculus OX=10090 GN=Gnpda2 PE=1 SV=1;tr|D3YWR1|D3YWR1_MOUSE Iso\\"\"\"\"\""	Gnpda2	4	9	7	30.913	5.38573e+06	3573700	0.00220351	1.50705	5371600	5116000	5669600	3254500	3513300	3953300
Q9DAK4	fatty acid binding protein 12	sp|Q9DAK4|FBP12_MOUSE Fatty acid-binding protein 12 OS=Mus musculus OX=10090 GN=Fabp12 PE=2 SV=1	Fabp12	1	3	3	14.758	410913	272777	0.000887858	1.5064	422070	391400	419270	252170	294020	272140
Q5M8M2;A0A2I3BQN6	outer dense fiber of sperm tails 3B	\\sp|Q5M8M2|ODF3B_MOUSE Outer dense fiber protein 3B OS=Mus musculus OX=10090 GN=Odf3b PE=2 SV=1;tr|A0A2I3BQN6|A0A2I3BQN6_MOUSE Isoform of Q5M8M2, Outer dense fiber protein 3B OS=Mus musculus OX=10090 GN=Odf3b PE=1 SV=1\\"\"\"\"\""	Odf3b	3	9	9	25.922	3.61363e+06	2.40137e+06	0.00123107	1.50482	3567900	3511000	3762000	2170100	2422800	2611200
Q9JME7	trafficking protein particle complex 2-like	sp|Q9JME7|TPC2L_MOUSE Trafficking protein particle complex subunit 2-like protein OS=Mus musculus OX=10090 GN=Trappc2l PE=1 SV=1	Trappc2l	1	2	2	16.018	2557300	1.69943e+06	0.00214313	1.50479	2511500	2458200	2702200	1516100	1737700	1844500
P58242	sphingomyelin phosphodiesterase, acid-like 3B	sp|P58242|ASM3B_MOUSE Acid sphingomyelinase-like phosphodiesterase 3b OS=Mus musculus OX=10090 GN=Smpdl3b PE=1 SV=1	Smpdl3b	1	5	5	51.599	1.43813e+06	955770	0.00597518	1.50468	1437900	1298200	1578300	892380	943130	1031800
P39061-2;P39061-1;E9QPX1;P39061	collagen, type XVIII, alpha 1	\\sp|P39061-2|COIA1_MOUSE Isoform of P39061, Isoform 3 of Collagen alpha-1(XVIII) chain OS=Mus musculus OX=10090 GN=Col18a1;sp|P39061-1|COIA1_MOUSE Isoform of P39061, Isoform 2 of Collagen alpha-1(XVIII) chain OS=Mus musculus OX=10090 GN=Col18a1;tr|E9QPX1|E9\\"\"\"\"\""	Col18a1	4	2	2	134.2	388200	257997	0.00268912	1.50466	391470	393680	379450	229110	250680	294200
O35215;G3UZN1	D-dopachrome tautomerase	\\sp|O35215|DOPD_MOUSE D-dopachrome decarboxylase OS=Mus musculus OX=10090 GN=Ddt PE=1 SV=3;tr|G3UZN1|G3UZN1_MOUSE Isoform of O35215, D-dopachrome decarboxylase OS=Mus musculus OX=10090 GN=Ddt PE=1 SV=1\\"\"\"\"\""	Ddt	2	7	4	13.077	4.22053e+06	2.80613e+06	0.00184352	1.50404	4112900	4013200	4535500	2618000	2809300	2991100
A0A0R4J1V0;Q9JIL4	PDZ domain containing 1	\\tr|A0A0R4J1V0|A0A0R4J1V0_MOUSE Isoform of Q9JIL4, Na(+)/H(+) exchange regulatory cofactor NHE-RF3 OS=Mus musculus OX=10090 GN=Pdzk1 PE=1 SV=1;sp|Q9JIL4|NHRF3_MOUSE Na(+)/H(+) exchange regulatory cofactor NHE-RF3 OS=Mus musculus OX=10090 GN=Pdzk1 PE=1 SV=1\\"\"\"\"\""	Pdzk1	5	11	11	56.497	3.71023e+06	2467100	0.00162099	1.50388	3567800	3699600	3863300	2225200	2466400	2709700
Q9CQ71	replication protein A3	sp|Q9CQ71|RFA3_MOUSE Replication protein A 14 kDa subunit OS=Mus musculus OX=10090 GN=Rpa3 PE=1 SV=1	Rpa3	1	2	2	13.584	1.04317e+06	693863	0.000518248	1.50342	1034400	1011100	1084000	674340	660750	746500
Q3V1T4;A6PW84;A2A7Q5;Q3V1T4-3	prolyl 3-hydroxylase 1	\\sp|Q3V1T4|P3H1_MOUSE Prolyl 3-hydroxylase 1 OS=Mus musculus OX=10090 GN=P3h1 PE=1 SV=2;tr|A6PW84|A6PW84_MOUSE Isoform of Q3V1T4, Prolyl 3-hydroxylase 1 OS=Mus musculus OX=10090 GN=P3h1 PE=1 SV=1;tr|A2A7Q5|A2A7Q5_MOUSE Isoform of Q3V1T4, Prolyl 3-hydroxylas\\"\"\"\"\""	P3h1	6	9	9	83.65	3.25633e+06	2.16613e+06	0.00207499	1.50329	3122600	3225200	3421200	1985000	2104900	2408500
P14873	microtubule-associated protein 1B	sp|P14873|MAP1B_MOUSE Microtubule-associated protein 1B OS=Mus musculus OX=10090 GN=Map1b PE=1 SV=2	Map1b	1	29	27	270.25	8.71423e+06	5799200	0.000919343	1.50266	8577300	8469400	9096000	5325100	5816500	6256000
Q8C0M9	asparaginase like 1	sp|Q8C0M9|ASGL1_MOUSE Isoaspartyl peptidase/L-asparaginase OS=Mus musculus OX=10090 GN=Asrgl1 PE=1 SV=1	Asrgl1	1	15	15	33.95	82739000	5.50677e+07	0.00304176	1.5025	80390000	79779000	88048000	49723000	54102000	61378000
G3X970;Q60736;E9PVX4;E9PZ07	zona pellucida 3 receptor	\\tr|G3X970|G3X970_MOUSE Isoform of Q60736, Zona pellucida 3 receptor OS=Mus musculus OX=10090 GN=Zp3r PE=1 SV=1;sp|Q60736|ZP3R_MOUSE Zona pellucida sperm-binding protein 3 receptor OS=Mus musculus OX=10090 GN=Zp3r PE=1 SV=1;tr|E9PVX4|E9PVX4_MOUSE Isoform of\\"\"\"\"\""	Zp3r	4	22	22	64.98	8.73103e+07	5.81183e+07	0.00703679	1.50229	84867000	81837000	95227000	50594000	59243000	64518000
G8JL63;J3QNP0;Q0KK59;E5CYJ9	unc-79 homolog	\\tr|G8JL63|G8JL63_MOUSE Isoform of Q0KK59, Protein unc-79 homolog OS=Mus musculus OX=10090 GN=Unc79 PE=1 SV=1;tr|J3QNP0|J3QNP0_MOUSE Isoform of Q0KK59, Protein unc-79 homolog (Fragment) OS=Mus musculus OX=10090 GN=Unc79 PE=1 SV=1;sp|Q0KK59|UNC79_MOUSE Prote\\"\"\"\"\""	Unc79	4	1	1	275.37	452253	301380	0.0176566	1.5006	442260	412600	501900	245050	321850	337240
D3Z795;Q9JK23	proteasome (prosome, macropain) assembly chaperone 1	\\tr|D3Z795|D3Z795_MOUSE Isoform of Q9JK23, Proteasome assembly chaperone 1 OS=Mus musculus OX=10090 GN=Psmg1 PE=1 SV=1;sp|Q9JK23|PSMG1_MOUSE Proteasome assembly chaperone 1 OS=Mus musculus OX=10090 GN=Psmg1 PE=1 SV=1\\"\"\"\"\""	Psmg1	3	7	7	30.54	3.34377e+06	2.22897e+06	0.00514367	1.50014	3336200	3120600	3574500	1933400	2438400	2315100
Q9JKB3-2	Y box protein 3	\\sp|Q9JKB3-2|YBOX3_MOUSE Isoform of Q9JKB3, Isoform 2 of Y-box-binding protein 3 OS=Mus musculus OX=10090 GN=Ybx3\\"\"\"\"\""	Ybx3	1	15	1	30.764	144860	416913	0.000437229	0.347457	142870	138580	153130	366650	442400	441690
Q9CTN5;F8WHJ9	RIKEN cDNA 4930447C04 gene	\\sp|Q9CTN5|S6OS1_MOUSE Protein SIX6OS1 OS=Mus musculus OX=10090 GN=Six6os1 PE=1 SV=2;tr|F8WHJ9|F8WHJ9_MOUSE Isoform of Q9CTN5, RIKEN cDNA 4930447C04 gene OS=Mus musculus OX=10090 GN=4930447C04Rik PE=1 SV=1\\"\"\"\"\""	4930447C04Rik	2	3	3	66.866	92747.7	268637	0.000124087	0.345252	93237	87812	97194	245360	280120	280430
D3YWT1;D3Z3N4	heterogeneous nuclear ribonucleoprotein H3	\\tr|D3YWT1|D3YWT1_MOUSE Isoform of D3Z3N4, Heterogeneous nuclear ribonucleoprotein H3 OS=Mus musculus OX=10090 GN=Hnrnph3 PE=1 SV=1;tr|D3Z3N4|D3Z3N4_MOUSE Heterogeneous nuclear ribonucleoprotein H3 OS=Mus musculus OX=10090 GN=Hnrnph3 PE=1 SV=1\\"\"\"\"\""	Hnrnph3	3	9	8	35.181	9471600	2.75577e+07	0.000827112	0.343701	9540500	9433700	9440600	25083000	26076000	31514000
P61327;Q9CQL1;G3UZW7	mago homolog, exon junction complex core component	\\sp|P61327|MGN_MOUSE Protein mago nashi homolog OS=Mus musculus OX=10090 GN=Magoh PE=2 SV=1;sp|Q9CQL1|MGN2_MOUSE Protein mago nashi homolog 2 OS=Mus musculus OX=10090 GN=Magohb PE=2 SV=1;tr|G3UZW7|G3UZW7_MOUSE Isoform of Q9CQL1, Protein mago nashi homolog 2\\"\"\"\"\""	Magoh	3	8	1	17.163	5024500	1.46463e+07	0.00023132	0.343055	5189100	4784000	5100400	13715000	14080000	16144000
Q5SUT0;Q61545;Q5SUS9	Ewing sarcoma breakpoint region 1	\\tr|Q5SUT0|Q5SUT0_MOUSE Isoform of Q61545, RNA-binding protein EWS OS=Mus musculus OX=10090 GN=Ewsr1 PE=1 SV=1;sp|Q61545|EWS_MOUSE RNA-binding protein EWS OS=Mus musculus OX=10090 GN=Ewsr1 PE=1 SV=2;tr|Q5SUS9|Q5SUS9_MOUSE Isoform of Q61545, RNA-binding prot\\"\"\"\"\""	Ewsr1	4	12	12	64.988	6.96157e+06	20461000	0.000324624	0.340236	7284600	6833300	6766800	18605000	20181000	22597000
Q6PDM2;H7BX95;Q6PDM2-3;Q6PDM2-2	serine/arginine-rich splicing factor 1	\\sp|Q6PDM2|SRSF1_MOUSE Serine/arginine-rich splicing factor 1 OS=Mus musculus OX=10090 GN=Srsf1 PE=1 SV=3;tr|H7BX95|H7BX95_MOUSE Isoform of Q6PDM2, Serine/arginine-rich-splicing factor 1 OS=Mus musculus OX=10090 GN=Srsf1 PE=1 SV=1;sp|Q6PDM2-3|SRSF1_MOUSE Is\\"\"\"\"\""	Srsf1	6	19	18	27.744	25409000	74751000	0.000146746	0.339915	25298000	25651000	25278000	69593000	73240000	81420000
Q9D424-2	calcium-binding tyrosine-(Y)-phosphorylation regulated (fibrousheathin 2)	\\sp|Q9D424-2|CABYR_MOUSE Isoform of Q9D424, Isoform 2 of Calcium-binding tyrosine phosphorylation-regulated protein OS=Mus musculus OX=10090 GN=Cabyr\\"\"\"\"\""	Cabyr	1	12	3	41.306	5310000	15694000	8.15e-05	0.338346	5668600	5096500	5164900	14743000	15513000	16826000
Q60749	KH domain containing, RNA binding, signal transduction associated 1	\\sp|Q60749|KHDR1_MOUSE KH domain-containing, RNA-binding, signal transduction-associated protein 1 OS=Mus musculus OX=10090 GN=Khdrbs1 PE=1 SV=2\\"\"\"\"\""	Khdrbs1	5	13	11	48.37	1.93517e+07	5.74847e+07	0.000191488	0.33664	19731000	18512000	19812000	52979000	56678000	62797000
D3YTQ3;Q9Z130;F6VQH5	heterogeneous nuclear ribonucleoprotein D-like	\\tr|D3YTQ3|D3YTQ3_MOUSE Isoform of Q9Z130, Heterogeneous nuclear ribonucleoprotein D-like OS=Mus musculus OX=10090 GN=Hnrnpdl PE=1 SV=1;sp|Q9Z130|HNRDL_MOUSE Heterogeneous nuclear ribonucleoprotein D-like OS=Mus musculus OX=10090 GN=Hnrnpdl PE=1 SV=1;tr|F6V\\"\"\"\"\""	Hnrnpdl	20	19	18	46.27	5136000	15265000	0.000295132	0.336456	5425000	4913000	5070000	13637000	15687000	16471000
A2A9P6;P24788;P24788-2	cyclin-dependent kinase 11B	\\tr|A2A9P6|A2A9P6_MOUSE Isoform of P24788, Cyclin-dependent kinase 11B OS=Mus musculus OX=10090 GN=Cdk11b PE=1 SV=1;sp|P24788|CD11B_MOUSE Cyclin-dependent kinase 11B OS=Mus musculus OX=10090 GN=Cdk11b PE=1 SV=2;sp|P24788-2|CD11B_MOUSE Isoform of P24788, Iso\\"\"\"\"\""	Cdk11b	4	17	17	87.319	4.88933e+06	14546000	0.000214273	0.336129	5003800	4649900	5014300	13176000	14726000	15736000
Q9D5Q6;E9Q366	spermatogenesis associated glutamate (E)-rich protein 4F1	tr|Q9D5Q6|Q9D5Q6_MOUSE MCG6381 OS=Mus musculus OX=10090 GN=Speer4f1 PE=2 SV=1;tr|E9Q366|E9Q366_MOUSE Spermatogenesis-associated glutamate (E)-rich protein 4f2 OS=Mus musculus OX=10090 GN=Speer4f2 PE=4 SV=2	Speer4f1	2	3	2	30.112	506740	1.50857e+06	0.000611714	0.335908	520180	475890	524150	1471400	1354800	1699500
P47911	ribosomal protein L6	sp|P47911|RL6_MOUSE 60S ribosomal protein L6 OS=Mus musculus OX=10090 GN=Rpl6 PE=1 SV=3	Rpl6	1	24	23	33.509	1.49267e+07	4.45393e+07	9.28e-05	0.335134	15693000	14279000	14808000	41939000	43625000	48054000
Q920N1;E9QNR9	outer dense fiber of sperm tails 3	\\sp|Q920N1|ODF3A_MOUSE Outer dense fiber protein 3 OS=Mus musculus OX=10090 GN=Odf3 PE=1 SV=2;tr|E9QNR9|E9QNR9_MOUSE Isoform of Q920N1, Outer dense fiber protein 3 OS=Mus musculus OX=10090 GN=Odf3 PE=4 SV=1\\"\"\"\"\""	Odf3	2	16	16	27.65	3.35343e+06	1.00098e+07	5.61e-05	0.335014	3507200	3287500	3265600	9368500	10040000	10621000
Q9JIX8-4;F6RJ39;Q9JIX8;Q9JIX8-3;Q9JIX8-2;B8JJ91	apoptotic chromatin condensation inducer 1	\\sp|Q9JIX8-4|ACINU_MOUSE Isoform of Q9JIX8, Isoform 4 of Apoptotic chromatin condensation inducer in the nucleus OS=Mus musculus OX=10090 GN=Acin1;tr|F6RJ39|F6RJ39_MOUSE Isoform of Q9JIX8, Apoptotic chromatin condensation inducer in the nucleus (Fragment) O\\"\"\"\"\""	Acin1	8	61	21	146.3	3.84857e+07	1.15277e+08	0.000187027	0.333855	40471000	37275000	37711000	105480000	115110000	125240000
Q9D1J3;A0A1W2P6N2;A0A1W2P7G2	predicted pseudogene 6563;SAP domain containing ribonucleoprotein	\\sp|Q9D1J3|SARNP_MOUSE SAP domain-containing ribonucleoprotein OS=Mus musculus OX=10090 GN=Sarnp PE=1 SV=3;tr|A0A1W2P6N2|A0A1W2P6N2_MOUSE Isoform of Q9D1J3, SAP domain-containing ribonucleoprotein OS=Mus musculus OX=10090 GN=Sarnp PE=1 SV=1;tr|A0A1W2P7G2|A0\\"\"\"\"\""	Gm6563;Sarnp	3	13	13	23.532	7.46357e+06	22378000	8.05e-05	0.333522	7647800	7178500	7564400	20909000	22222000	24003000
P27048;P63163	small nuclear ribonucleoprotein B	sp|P27048|RSMB_MOUSE Small nuclear ribonucleoprotein-associated protein B OS=Mus musculus OX=10090 GN=Snrpb PE=1 SV=1;sp|P63163|RSMN_MOUSE Small nuclear ribonucleoprotein-associated protein N OS=Mus musculus OX=10090 GN=Snrpn PE=1 SV=1	Snrpb	3	9	9	23.656	7.68377e+06	2.30987e+07	0.000201689	0.33265	7672800	8060700	7317800	21171000	22927000	25198000
P84104-2;P84104;A2A4X6	serine/arginine-rich splicing factor 3	\\sp|P84104-2|SRSF3_MOUSE Isoform of P84104, Isoform Short of Serine/arginine-rich splicing factor 3 OS=Mus musculus OX=10090 GN=Srsf3;sp|P84104|SRSF3_MOUSE Serine/arginine-rich splicing factor 3 OS=Mus musculus OX=10090 GN=Srsf3 PE=1 SV=1;tr|A2A4X6|A2A4X6_M\\"\"\"\"\""	Srsf3	3	13	12	14.203	2.66327e+07	8.05973e+07	0.000179195	0.330441	26658000	26116000	27124000	74123000	79719000	87950000
A2A8V9;E9PUK6;A2A8V8;Q52KI8;E9QKA4;Q52KI8-2	serine/arginine repetitive matrix 1	\\tr|A2A8V9|A2A8V9_MOUSE Isoform of Q52KI8, Serine/arginine repetitive matrix protein 1 OS=Mus musculus OX=10090 GN=Srrm1 PE=1 SV=1;tr|E9PUK6|E9PUK6_MOUSE Isoform of Q52KI8, Serine/arginine repetitive matrix protein 1 OS=Mus musculus OX=10090 GN=Srrm1 PE=1 S\\"\"\"\"\""	Srrm1	10	17	17	103.71	8627300	2.61137e+07	6.58e-05	0.330375	8883000	8371600	8627300	24390000	26093000	27858000
Q9CQI7;A2CES4	U2 small nuclear ribonucleoprotein B	\\sp|Q9CQI7|RU2B_MOUSE U2 small nuclear ribonucleoprotein B OS=Mus musculus OX=10090 GN=Snrpb2 PE=1 SV=1;tr|A2CES4|A2CES4_MOUSE Isoform of Q9CQI7, U2 small nuclear ribonucleoprotein B (Fragment) OS=Mus musculus OX=10090 GN=Snrpb2 PE=1 SV=1\\"\"\"\"\""	Snrpb2	2	10	7	25.323	6683200	2.03113e+07	0.000103771	0.329038	6542500	6705000	6802100	19065000	19854000	22015000
P62996;F8WJG3	transformer 2 beta	\\sp|P62996|TRA2B_MOUSE Transformer-2 protein homolog beta OS=Mus musculus OX=10090 GN=Tra2b PE=1 SV=1;tr|F8WJG3|F8WJG3_MOUSE Isoform of P62996, Transformer-2 protein homolog beta OS=Mus musculus OX=10090 GN=Tra2b PE=1 SV=1\\"\"\"\"\""	Tra2b	4	13	11	33.665	30971000	9.42423e+07	0.000158719	0.328632	31134000	30022000	31757000	87234000	92723000	102770000
Q8C854-3;Q8C854;A2ATP5;A2ATP6;G8JL68;Q8C854-1;Q8C854-2;F6XJA1	predicted gene 9833;myelin basic protein expression factor 2, repressor	\\sp|Q8C854-3|MYEF2_MOUSE Isoform of Q8C854, Isoform 2 of Myelin expression factor 2 OS=Mus musculus OX=10090 GN=Myef2;sp|Q8C854|MYEF2_MOUSE Myelin expression factor 2 OS=Mus musculus OX=10090 GN=Myef2 PE=1 SV=1;tr|A2ATP5|A2ATP5_MOUSE Isoform of Q8C854, Myel\\"\"\"\"\""	Gm9833;Myef2	8	27	27	61.733	2.20003e+07	6.71077e+07	0.000156748	0.327836	22649000	21606000	21746000	63580000	64172000	73571000
F7D1J2;Q60855	receptor (TNFRSF)-interacting serine-threonine kinase 1	\\tr|F7D1J2|F7D1J2_MOUSE Isoform of Q60855, Receptor-interacting serine/threonine-protein kinase 1 (Fragment) OS=Mus musculus OX=10090 GN=Ripk1 PE=1 SV=1;sp|Q60855|RIPK1_MOUSE Receptor-interacting serine/threonine-protein kinase 1 OS=Mus musculus OX=10090 GN\\"\"\"\"\""	Ripk1	2	1	1	68.027	215780	658817	0.000122822	0.327526	225760	186680	234900	610080	666830	699540
Q8CFQ9;P56959;G3UXT7	fused in sarcoma	\\tr|Q8CFQ9|Q8CFQ9_MOUSE Isoform of P56959, Fusion, derived from t(1216) malignant liposarcoma (Human) OS=Mus musculus OX=10090 GN=Fus PE=1 SV=1;sp|P56959|FUS_MOUSE RNA-binding protein FUS OS=Mus musculus OX=10090 GN=Fus PE=1 SV=1;tr|G3UXT7|G3UXT7_MOUSE Isof\\"\"\"\"\""	Fus	5	13	11	52.601	7.82413e+06	2.40097e+07	0.000247932	0.325874	7701900	8064600	7705900	22328000	23119000	26582000
B2RW38	cilia and flagella associated protein 58	sp|B2RW38|CFA58_MOUSE Cilia- and flagella-associated protein 58 OS=Mus musculus OX=10090 GN=Cfap58 PE=2 SV=1	Cfap58	1	15	15	103.52	951657	2920600	3.69e-05	0.325843	969490	960930	924550	2739600	2948200	3074000
Q9D823	ribosomal protein L37, retrotransposed;ribosomal protein L37	sp|Q9D823|RL37_MOUSE 60S ribosomal protein L37 OS=Mus musculus OX=10090 GN=Rpl37 PE=3 SV=3	Rpl37rt;Rpl37	1	8	8	11.078	7.43437e+06	22868000	0.000313655	0.325099	7684500	6774900	7843700	20952000	22340000	25312000
Q3U1D9	RIKEN cDNA 1700029J07 gene	sp|Q3U1D9|CD047_MOUSE UPF0602 protein C4orf47 homolog OS=Mus musculus OX=10090 PE=2 SV=1	1700029J07Rik	1	5	5	35.26	417963	1.28897e+06	0.00071571	0.324262	391880	454670	407340	1207800	1188900	1470200
A2AR02	peptidyl-prolyl isomerase G (cyclophilin G)	sp|A2AR02|PPIG_MOUSE Peptidyl-prolyl cis-trans isomerase G OS=Mus musculus OX=10090 GN=Ppig PE=1 SV=1	Ppig	2	23	23	88.324	8211200	2.53947e+07	0.000333139	0.323343	8601600	7953400	8078600	22873000	25284000	28027000
Q8VBW5-3;Q8VBW5;B8JK50;Q8VBW5-4;Q8VBW5-2	bobby sox HMG box containing	\\sp|Q8VBW5-3|BBX_MOUSE Isoform of Q8VBW5, Isoform 3 of HMG box transcription factor BBX OS=Mus musculus OX=10090 GN=Bbx;sp|Q8VBW5|BBX_MOUSE HMG box transcription factor BBX OS=Mus musculus OX=10090 GN=Bbx PE=1 SV=2;tr|B8JK50|B8JK50_MOUSE Isoform of Q8VBW5, \\"\"\"\"\""	Bbx	5	22	22	98.499	4530700	14014000	0.000194076	0.323298	4465100	4475100	4651900	13461000	13140000	15441000
Q9DAY9;Q5SQB5;Q61937;Q5SQB0	nucleophosmin 1	\\tr|Q9DAY9|Q9DAY9_MOUSE Isoform of Q61937, Nucleophosmin OS=Mus musculus OX=10090 GN=Npm1 PE=1 SV=1;tr|Q5SQB5|Q5SQB5_MOUSE Isoform of Q61937, Nucleophosmin OS=Mus musculus OX=10090 GN=Npm1 PE=1 SV=1;sp|Q61937|NPM_MOUSE Nucleophosmin OS=Mus musculus OX=10090\\"\"\"\"\""	Npm1	4	14	14	28.385	2.24493e+07	69706000	0.000367141	0.322057	23406000	20414000	23528000	61485000	73905000	73728000
A2BE93;Q9EQU5-2;Q9EQU5;A2BE92	SET nuclear oncogene	\\tr|A2BE93|A2BE93_MOUSE Isoform of Q9EQU5, Protein SET (Fragment) OS=Mus musculus OX=10090 GN=Set PE=1 SV=1;sp|Q9EQU5-2|SET_MOUSE Isoform of Q9EQU5, Isoform 2 of Protein SET OS=Mus musculus OX=10090 GN=Set;sp|Q9EQU5|SET_MOUSE Protein SET OS=Mus musculus OX=\\"\"\"\"\""	Set	5	5	5	24.923	2.19717e+06	6846900	0.000164633	0.320899	2107100	2352500	2131900	6310400	6781000	7449300
Q9QXN3;Q9QXN3-2	thyroid hormone receptor interactor 4	\\sp|Q9QXN3|TRIP4_MOUSE Activating signal cointegrator 1 OS=Mus musculus OX=10090 GN=Trip4 PE=1 SV=2;sp|Q9QXN3-2|TRIP4_MOUSE Isoform of Q9QXN3, Isoform 2 of Activating signal cointegrator 1 OS=Mus musculus OX=10090 GN=Trip4\\"\"\"\"\""	Trip4	2	7	7	66.197	3427800	1.07206e+07	0.00103289	0.319741	3045100	3762700	3475600	9166700	11000000	11995000
E9Q5K9-3;E9Q5K9-2	YTH domain containing 1	\\sp|E9Q5K9-3|YTDC1_MOUSE Isoform of E9Q5K9, Isoform 3 of YTH domain-containing protein 1 OS=Mus musculus OX=10090 GN=Ythdc1;sp|E9Q5K9-2|YTDC1_MOUSE Isoform of E9Q5K9, Isoform 2 of YTH domain-containing protein 1 OS=Mus musculus OX=10090 GN=Ythdc1\\"\"\"\"\""	Ythdc1	2	20	1	82.753	8286900	25998000	0.000152084	0.318751	8463600	8278500	8118600	24291000	25238000	28465000
Q91Z49;Q91Z49-2;Q91Z49-3	forty-two-three domain containing 1	\\sp|Q91Z49|UIF_MOUSE UAP56-interacting factor OS=Mus musculus OX=10090 GN=Fyttd1 PE=1 SV=1;sp|Q91Z49-2|UIF_MOUSE Isoform of Q91Z49, Isoform 2 of UAP56-interacting factor OS=Mus musculus OX=10090 GN=Fyttd1;sp|Q91Z49-3|UIF_MOUSE Isoform of Q91Z49, Isoform 3 o\\"\"\"\"\""	Fyttd1	4	19	19	35.887	5.97147e+06	18739000	9.53e-05	0.318665	6074100	6061200	5779100	17389000	18652000	20176000
P62307	small nuclear ribonucleoprotein polypeptide F	sp|P62307|RUXF_MOUSE Small nuclear ribonucleoprotein F OS=Mus musculus OX=10090 GN=Snrpf PE=1 SV=1	Snrpf	1	2	2	9.7251	2553300	8014800	4.34e-05	0.318573	2681800	2629700	2348400	7706400	7795600	8542400
Q9DAE2	RNA binding motif protein, X-linked-like 2	\\tr|Q9DAE2|Q9DAE2_MOUSE RNA-binding motif protein, X-linked-like 2 OS=Mus musculus OX=10090 GN=Rbmxl2 PE=1 SV=1\\"\"\"\"\""	Rbmxl2	1	40	37	41.912	88430000	2.89037e+08	6.53e-05	0.305947	90430000	86271000	88589000	273120000	282560000	311430000
D3Z5E1;Q9WVB3	transducin-like enhancer of split 6	\\tr|D3Z5E1|D3Z5E1_MOUSE Isoform of Q9WVB3, Transducin-like enhancer of split 6, homolog of Drosophila E(Spl), isoform CRA_c OS=Mus musculus OX=10090 GN=Tle6 PE=4 SV=1;sp|Q9WVB3|TLE6_MOUSE Transducin-like enhancer protein 6 OS=Mus musculus OX=10090 GN=Tle6 P\\"\"\"\"\""	Tle6	2	4	4	64.059	239520	787313	0.000167692	0.304224	243780	242490	232290	735570	760300	866070
Q02614	SAP30 binding protein	sp|Q02614|S30BP_MOUSE SAP30-binding protein OS=Mus musculus OX=10090 GN=Sap30bp PE=1 SV=2	Sap30bp	1	5	5	33.832	961390	3.18037e+06	2.6e-05	0.302289	945340	948490	990340	2999300	3195200	3346600
Q80Y37	heat shock transcription factor, Y-linked 2	\\tr|Q80Y37|Q80Y37_MOUSE Heat shock transcription factor, Y-linked 2 OS=Mus musculus OX=10090 GN=Hsfy2 PE=2 SV=1\\"\"\"\"\""	Hsfy2	1	9	8	44.228	2.01667e+06	6.71933e+06	6.72e-05	0.300129	2035900	2050200	1963900	6406700	6489600	7261700
A2BI12	PC4 and SFRS1 interacting protein 1	\\tr|A2BI12|A2BI12_MOUSE Isoform of Q99JF8, PC4 and SFRS1-interacting protein OS=Mus musculus OX=10090 GN=Psip1 PE=1 SV=1\\"\"\"\"\""	Psip1	1	35	3	36.968	1673300	5.58703e+06	0.000392047	0.299497	1671600	1635400	1712900	5079100	5408900	6273100
A0A286YE36;O88491;E9QAE4	nuclear receptor-binding SET-domain protein 1	\\tr|A0A286YE36|A0A286YE36_MOUSE Isoform of O88491, Histone-lysine N-methyltransferase, H3 lysine-36 and H4 lysine-20-specific OS=Mus musculus OX=10090 GN=Nsd1 PE=1 SV=1;sp|O88491|NSD1_MOUSE Histone-lysine N-methyltransferase, H3 lysine-36 and H4 lysine-20 s\\"\"\"\"\""	Nsd1	3	3	2	284.04	5.51837e+06	18457000	0.000464085	0.298985	5544300	5868500	5142300	16732000	17841000	20798000
P15864	histone cluster 1, H1c	sp|P15864|H12_MOUSE Histone H1.2 OS=Mus musculus OX=10090 GN=Hist1h1c PE=1 SV=2	Hist1h1c	1	16	5	21.266	4.68667e+07	1.57613e+08	0.000241876	0.297352	46037000	49271000	45292000	147250000	150400000	175190000
A2ARZ3	fibrous sheath-interacting protein 2	sp|A2ARZ3|FSIP2_MOUSE Fibrous sheath-interacting protein 2 OS=Mus musculus OX=10090 GN=Fsip2 PE=1 SV=3	Fsip2	3	118	118	784.85	1.64867e+07	5.60373e+07	5.03e-05	0.294209	16737000	17128000	15595000	52890000	55234000	59988000
E9PUJ8;B9EKG2	maestro heat-like repeat family member 5	\\tr|E9PUJ8|E9PUJ8_MOUSE Maestro heat-like repeat family member 5 OS=Mus musculus OX=10090 GN=Mroh5 PE=4 SV=1;tr|B9EKG2|B9EKG2_MOUSE Isoform of E9PUJ8, Gm628 protein OS=Mus musculus OX=10090 GN=Mroh5 PE=2 SV=1\\"\"\"\"\""	Mroh5	2	2	2	86.853	57979.3	197800	0.000155638	0.29312	52894	68433	52611	189220	189180	215000
Q08288	Ly1 antibody reactive clone	sp|Q08288|LYAR_MOUSE Cell growth-regulating nucleolar protein OS=Mus musculus OX=10090 GN=Lyar PE=1 SV=2	Lyar	7	31	31	43.735	3.30147e+07	1.13033e+08	0.00019224	0.292079	33323000	31400000	34321000	101320000	116500000	121280000
D3Z773;D3Z0R0;D3Z011;D3Z4K8	cAMP responsive element modulator	\\tr|D3Z773|D3Z773_MOUSE Isoform of P27699, cAMP-responsive element modulator OS=Mus musculus OX=10090 GN=Crem PE=1 SV=1;tr|D3Z0R0|D3Z0R0_MOUSE Isoform of P27699, cAMP-responsive element modulator OS=Mus musculus OX=10090 GN=Crem PE=1 SV=1;tr|D3Z011|D3Z011_M\\"\"\"\"\""	Crem	4	4	1	24.524	918837	3.18257e+06	3.9e-05	0.288709	922650	841390	992470	3011700	3158900	3377100
Q9CX86	heterogeneous nuclear ribonucleoprotein A0	sp|Q9CX86|ROA0_MOUSE Heterogeneous nuclear ribonucleoprotein A0 OS=Mus musculus OX=10090 GN=Hnrnpa0 PE=1 SV=1	Hnrnpa0	1	14	14	30.53	27676000	9.59243e+07	9.99e-05	0.288519	28001000	27151000	27876000	88990000	94753000	104030000
Q62376;Q62376-2;A0A1B0GRR8	small nuclear ribonucleoprotein 70 (U1)	\\sp|Q62376|RU17_MOUSE U1 small nuclear ribonucleoprotein 70 kDa OS=Mus musculus OX=10090 GN=Snrnp70 PE=1 SV=2;sp|Q62376-2|RU17_MOUSE Isoform of Q62376, Isoform 2 of U1 small nuclear ribonucleoprotein 70 kDa OS=Mus musculus OX=10090 GN=Snrnp70;tr|A0A1B0GRR8|\\"\"\"\"\""	Snrnp70	8	22	22	51.991	1.17383e+07	40919000	9.52e-05	0.286868	11607000	12535000	11073000	39041000	39190000	44526000
O08583;O08583-2	Aly/REF export factor	\\sp|O08583|THOC4_MOUSE THO complex subunit 4 OS=Mus musculus OX=10090 GN=Alyref PE=1 SV=3;sp|O08583-2|THOC4_MOUSE Isoform of O08583, Isoform 2 of THO complex subunit 4 OS=Mus musculus OX=10090 GN=Alyref\\"\"\"\"\""	Alyref	5	10	9	26.94	6.45263e+06	22494000	0.000209411	0.28686	6635500	6370800	6351600	20716000	21881000	24885000
G5E924;Q8R081;G3UY38	heterogeneous nuclear ribonucleoprotein L	\\tr|G5E924|G5E924_MOUSE Isoform of Q8R081, Heterogeneous nuclear ribonucleoprotein L (Fragment) OS=Mus musculus OX=10090 GN=Hnrnpl PE=1 SV=1;sp|Q8R081|HNRPL_MOUSE Heterogeneous nuclear ribonucleoprotein L OS=Mus musculus OX=10090 GN=Hnrnpl PE=1 SV=2;tr|G3UY\\"\"\"\"\""	Hnrnpl	5	32	32	66.821	73617000	2.59263e+08	7.52e-05	0.283947	73393000	73229000	74229000	243230000	253960000	280600000
Q8CDM4;A2A6Z7;A2A6Z8	coiled-coil domain containing 73	\\sp|Q8CDM4|CCD73_MOUSE Coiled-coil domain-containing protein 73 OS=Mus musculus OX=10090 GN=Ccdc73 PE=2 SV=2;tr|A2A6Z7|A2A6Z7_MOUSE Isoform of Q8CDM4, Coiled-coil domain containing 73 (Fragment) OS=Mus musculus OX=10090 GN=Ccdc73 PE=4 SV=1;tr|A2A6Z8|A2A6Z8_\\"\"\"\"\""	Ccdc73	3	2	2	120.39	202463	724570	0.000247367	0.279425	181360	243960	182070	701570	675430	796710
Q99020;Q20BD0;Q80XR6	heterogeneous nuclear ribonucleoprotein A/B	\\sp|Q99020|ROAA_MOUSE Heterogeneous nuclear ribonucleoprotein A/B OS=Mus musculus OX=10090 GN=Hnrnpab PE=1 SV=1;tr|Q20BD0|Q20BD0_MOUSE Isoform of Q99020, Heterogeneous nuclear ribonucleoprotein A/B OS=Mus musculus OX=10090 GN=Hnrnpab PE=1 SV=1;tr|Q80XR6|Q80\\"\"\"\"\""	Hnrnpab	3	15	15	30.831	5540300	1.98983e+07	0.00036592	0.27843	5943900	5364300	5312700	18140000	19191000	22364000
E9Q3P4	centromere protein F	tr|E9Q3P4|E9Q3P4_MOUSE Centromere protein F OS=Mus musculus OX=10090 GN=Cenpf PE=1 SV=1	Cenpf	3	5	5	342.47	233920	841807	0.000175941	0.277878	277410	206470	217880	820770	786520	918130
Q61656;Q8BTS0;S4R1I6	DEAD (Asp-Glu-Ala-Asp) box polypeptide 5	\\sp|Q61656|DDX5_MOUSE Probable ATP-dependent RNA helicase DDX5 OS=Mus musculus OX=10090 GN=Ddx5 PE=1 SV=2;tr|Q8BTS0|Q8BTS0_MOUSE Isoform of Q61656, DEAD (Asp-Glu-Ala-Asp) box polypeptide 5 OS=Mus musculus OX=10090 GN=Ddx5 PE=1 SV=1;tr|S4R1I6|S4R1I6_MOUSE Is\\"\"\"\"\""	Ddx5	6	51	39	69.289	4.88087e+07	1.75803e+08	0.000155128	0.277632	48096000	50181000	48149000	162930000	171080000	193400000
Q8VEK3-2;Q8VEK3	heterogeneous nuclear ribonucleoprotein U	\\sp|Q8VEK3-2|HNRPU_MOUSE Isoform of Q8VEK3, Isoform 2 of Heterogeneous nuclear ribonucleoprotein U OS=Mus musculus OX=10090 GN=Hnrnpu;sp|Q8VEK3|HNRPU_MOUSE Heterogeneous nuclear ribonucleoprotein U OS=Mus musculus OX=10090 GN=Hnrnpu PE=1 SV=1\\"\"\"\"\""	Hnrnpu	3	50	50	86.805	98980000	362860000	9.45e-05	0.272777	100670000	96645000	99625000	338590000	355150000	394840000
Q3TWW8	serine/arginine-rich splicing factor 6	sp|Q3TWW8|SRSF6_MOUSE Serine/arginine-rich splicing factor 6 OS=Mus musculus OX=10090 GN=Srsf6 PE=1 SV=1	Srsf6	2	18	14	39.025	1.11843e+07	41034000	9.81e-05	0.272563	11449000	10835000	11269000	37774000	40965000	44363000
P43277	histone cluster 1, H1d	sp|P43277|H13_MOUSE Histone H1.3 OS=Mus musculus OX=10090 GN=Hist1h1d PE=1 SV=2	Hist1h1d	1	15	1	22.099	36669000	1.34933e+08	0.000308774	0.271756	35464000	36292000	38251000	120360000	135040000	149400000
E9Q9U8	coiled-coil domain containing 74A	tr|E9Q9U8|E9Q9U8_MOUSE Coiled-coil domain-containing 74A OS=Mus musculus OX=10090 GN=Ccdc74a PE=1 SV=1	Ccdc74a	1	2	2	39.682	47750.3	176137	0.000327191	0.271097	64216	39881	39154	166610	170760	191040
Q9CWE6	oocyte expressed protein	sp|Q9CWE6|OOEP_MOUSE Oocyte-expressed protein homolog OS=Mus musculus OX=10090 GN=Ooep PE=1 SV=1	Ooep	1	1	1	18.46	38453.7	146473	0.000128843	0.262528	51646	34686	29029	149840	149000	140580
A0A286YDA2;A0A286YDT3;A0A286YDV7;E9Q5C9;E9Q5C9-2	nucleolar and coiled-body phosphoprotein 1	\\tr|A0A286YDA2|A0A286YDA2_MOUSE Isoform of E9Q5C9, Nucleolar and coiled-body phosphoprotein 1 OS=Mus musculus OX=10090 GN=Nolc1 PE=1 SV=1;tr|A0A286YDT3|A0A286YDT3_MOUSE Isoform of E9Q5C9, Nucleolar and coiled-body phosphoprotein 1 OS=Mus musculus OX=10090 G\\"\"\"\"\""	Nolc1	7	22	22	73.427	5723900	2.18573e+07	4.23e-05	0.261875	5682300	5641900	5847500	20699000	21400000	23473000
A3KG49;A2BG95	predicted gene 5640	tr|A3KG49|A3KG49_MOUSE Uncharacterized protein OS=Mus musculus OX=10090 GN=Gm5640 PE=4 SV=1;tr|A2BG95|A2BG95_MOUSE Uncharacterized protein OS=Mus musculus OX=10090 GN=Gm5936 PE=4 SV=1	Gm5640	2	5	1	81.425	13654.3	52869.3	0.000203032	0.258261	16982	12329	11652	47935	56165	54508
Q8CCS6;Q8CCS6-2;G3UY42;D3Z5F7;D3YUB9	poly(A) binding protein, nuclear 1	\\sp|Q8CCS6|PABP2_MOUSE Polyadenylate-binding protein 2 OS=Mus musculus OX=10090 GN=Pabpn1 PE=1 SV=3;sp|Q8CCS6-2|PABP2_MOUSE Isoform of Q8CCS6, Isoform 2 of Polyadenylate-binding protein 2 OS=Mus musculus OX=10090 GN=Pabpn1;tr|G3UY42|G3UY42_MOUSE Isoform of \\"\"\"\"\""	Pabpn1	7	13	5	32.296	8379500	32869000	0.000101515	0.254936	8361300	8782000	7995200	30452000	32355000	35800000
Q9DAF1	RIKEN cDNA 1700012A03 gene	tr|Q9DAF1|Q9DAF1_MOUSE RIKEN cDNA 1700012A03 gene OS=Mus musculus OX=10090 GN=1700012A03Rik PE=2 SV=1	1700012A03Rik	1	3	3	14.949	481847	1929700	0.00376999	0.2497	463200	457440	524900	1513900	2339700	1935500
O88569;O88569-2;O88569-3	heterogeneous nuclear ribonucleoprotein A2/B1;heterogeneous nuclear ribonucleoproteins A2/B1	\\sp|O88569|ROA2_MOUSE Heterogeneous nuclear ribonucleoproteins A2/B1 OS=Mus musculus OX=10090 GN=Hnrnpa2b1 PE=1 SV=2;sp|O88569-2|ROA2_MOUSE Isoform of O88569, Isoform 2 of Heterogeneous nuclear ribonucleoproteins A2/B1 OS=Mus musculus OX=10090 GN=Hnrnpa2b1;\\"\"\"\"\""	Hnrnpa2b1;LOC102642938	4	24	23	37.402	1.02761e+08	418610000	0.000181567	0.245481	101500000	107800000	98982000	400650000	389980000	465200000
O35326;Q9D8S5	serine/arginine-rich splicing factor 5	\\sp|O35326|SRSF5_MOUSE Serine/arginine-rich splicing factor 5 OS=Mus musculus OX=10090 GN=Srsf5 PE=1 SV=2;tr|Q9D8S5|Q9D8S5_MOUSE Isoform of O35326, MCG7614, isoform CRA_c OS=Mus musculus OX=10090 GN=Srsf5 PE=1 SV=1\\"\"\"\"\""	Srsf5	3	10	9	30.891	5690800	2.39233e+07	0.000140777	0.237877	5818500	5536100	5717800	22049000	23359000	26362000
Q9D2F5	sperm tail PG rich repeat containing 1	sp|Q9D2F5|STPG1_MOUSE O(6)-methylguanine-induced apoptosis 2 OS=Mus musculus OX=10090 GN=Stpg1 PE=2 SV=1	Stpg1	1	1	1	37.498	110713	468393	8.39e-05	0.236368	129820	100780	101540	440440	458020	506720
Q64GA5;Q64GA5-2	phospholipase A2, group IVC (cytosolic, calcium-independent)	\\sp|Q64GA5|PA24C_MOUSE Cytosolic phospholipase A2 gamma OS=Mus musculus OX=10090 GN=Pla2g4c PE=1 SV=1;sp|Q64GA5-2|PA24C_MOUSE Isoform of Q64GA5, Isoform 2 of Cytosolic phospholipase A2 gamma OS=Mus musculus OX=10090 GN=Pla2g4c\\"\"\"\"\""	Pla2g4c	2	1	1	67.881	22075.7	97334.7	1.5e-05	0.226799	22452	26806	16969	98521	98029	95454
F2Z472-2;Q8BZH8;F2Z472	seminal vesicle secretory protein 3A	\\sp|F2Z472-2|SVS3A_MOUSE Isoform of F2Z472, Isoform 2 of Seminal vesicle secretory protein 3A OS=Mus musculus OX=10090 GN=Svs3a;tr|Q8BZH8|Q8BZH8_MOUSE Seminal vesicle secretory protein 3B OS=Mus musculus OX=10090 GN=Svs3b PE=2 SV=1;sp|F2Z472|SVS3A_MOUSE Sem\\"\"\"\"\""	Svs3a	3	2	2	29.896	74463.7	333017	1.28e-05	0.223603	74393	77484	71514	313570	341510	343970
Q8K3V4	peptidyl arginine deiminase, type VI	sp|Q8K3V4|PADI6_MOUSE Protein-arginine deiminase type-6 OS=Mus musculus OX=10090 GN=Padi6 PE=1 SV=2	Padi6	2	14	14	76.778	2230700	1.00584e+07	6.51e-05	0.221776	2386300	2101200	2204600	9741600	9498500	10935000
P43275	histone cluster 1, H1a	sp|P43275|H11_MOUSE Histone H1.1 OS=Mus musculus OX=10090 GN=Hist1h1a PE=1 SV=2	Hist1h1a	1	12	9	21.785	1.99683e+07	9.00827e+07	5.94e-05	0.221667	20656000	19682000	19567000	86630000	85679000	97939000
Q62189;D3Z0S6;F8VQ88	small nuclear ribonucleoprotein polypeptide A	\\sp|Q62189|SNRPA_MOUSE U1 small nuclear ribonucleoprotein A OS=Mus musculus OX=10090 GN=Snrpa PE=1 SV=3;tr|D3Z0S6|D3Z0S6_MOUSE Isoform of Q62189, U1 small nuclear ribonucleoprotein A (Fragment) OS=Mus musculus OX=10090 GN=Snrpa PE=1 SV=1;tr|F8VQ88|F8VQ88_MO\\"\"\"\"\""	Snrpa	4	10	8	31.835	1.07357e+07	5.04263e+07	9.35e-05	0.212898	10658000	10773000	10776000	47307000	48579000	55393000
Q8R3C6-2;A0A0J9YUT8;Q8R3C6	RNA binding motif protein 19	\\sp|Q8R3C6-2|RBM19_MOUSE Isoform of Q8R3C6, Isoform 2 of Probable RNA-binding protein 19 OS=Mus musculus OX=10090 GN=Rbm19;tr|A0A0J9YUT8|A0A0J9YUT8_MOUSE Isoform of Q8R3C6, Probable RNA-binding protein 19 OS=Mus musculus OX=10090 GN=Rbm19 PE=1 SV=1;sp|Q8R3C\\"\"\"\"\""	Rbm19	3	2	2	57.939	958963	4519100	5.65e-05	0.212202	925460	990950	960480	4147600	4589600	4820100
Q9D411;Q9D411-2;A9P6P9;A3QQR1;A0A2I3BQE9;A0A2I3BQS0	testis-specific serine kinase 4	\\sp|Q9D411|TSSK4_MOUSE Testis-specific serine/threonine-protein kinase 4 OS=Mus musculus OX=10090 GN=Tssk4 PE=2 SV=1;sp|Q9D411-2|TSSK4_MOUSE Isoform of Q9D411, Isoform 2 of Testis-specific serine/threonine-protein kinase 4 OS=Mus musculus OX=10090 GN=Tssk4;\\"\"\"\"\""	Tssk4	7	5	5	37.377	271450	1.29327e+06	5.65e-06	0.209895	279830	287440	247080	1245100	1288200	1346500
Q9JI48	placenta-specific 8	sp|Q9JI48|PLAC8_MOUSE Placenta-specific gene 8 protein OS=Mus musculus OX=10090 GN=Plac8 PE=1 SV=1	Plac8	1	1	1	12.353	3743.67	17990.3	0.0219893	0.208082	0	11231	0	18072	15965	19934
Q8BQ46;F6QCI0	TATA-box binding protein associated factor 15	\\tr|Q8BQ46|Q8BQ46_MOUSE TAF15 RNA polymerase II, TATA box binding protein (TBP)-associated factor OS=Mus musculus OX=10090 GN=Taf15 PE=1 SV=1;tr|F6QCI0|F6QCI0_MOUSE Isoform of Q8BQ46, TATA-box-binding protein-associated factor 15 (Fragment) OS=Mus musculus \\"\"\"\"\""	Taf15	2	10	8	58.6	1.14037e+06	5.59737e+06	0.000195956	0.203733	1181400	1165400	1074300	4920600	5917600	5953900
Q14DL2;Q9D5W6;E0CXJ0	solute carrier organic anion transporter family, member 6d1	\\tr|Q14DL2|Q14DL2_MOUSE Isoform of Q9D5W6, Slco6d1 protein OS=Mus musculus OX=10090 GN=Slco6d1 PE=2 SV=1;tr|Q9D5W6|Q9D5W6_MOUSE MCG6225 OS=Mus musculus OX=10090 GN=Slco6d1 PE=2 SV=1;tr|E0CXJ0|E0CXJ0_MOUSE Isoform of Q9D5W6, Solute carrier organic anion tran\\"\"\"\"\""	Slco6d1	3	2	2	72.882	121670	606067	0.000294704	0.200753	115270	130300	119440	559960	570840	687400
Q6WIZ7	seminal vesicle secretory protein 1	tr|Q6WIZ7|Q6WIZ7_MOUSE Amine oxidase OS=Mus musculus OX=10090 GN=Svs1 PE=2 SV=1	Svs1	2	7	6	93.529	312710	1676800	1.26e-05	0.186492	319090	320640	298400	1598500	1657900	1774000
Q60662-2;Q60662	A kinase (PRKA) anchor protein 4	\\sp|Q60662-2|AKAP4_MOUSE Isoform of Q60662, Isoform 2 of A-kinase anchor protein 4 OS=Mus musculus OX=10090 GN=Akap4;sp|Q60662|AKAP4_MOUSE A-kinase anchor protein 4 OS=Mus musculus OX=10090 GN=Akap4 PE=1 SV=1\\"\"\"\"\""	Akap4	2	58	58	92.853	68545000	3.84953e+08	9.09e-05	0.178061	70798000	68956000	65881000	360740000	369880000	424240000
P60824;K4DI65	cold inducible RNA binding protein	\\sp|P60824|CIRBP_MOUSE Cold-inducible RNA-binding protein OS=Mus musculus OX=10090 GN=Cirbp PE=1 SV=1;tr|K4DI65|K4DI65_MOUSE Isoform of P60824, Cold inducible RNA binding protein, isoform CRA_a OS=Mus musculus OX=10090 GN=Cirbp PE=1 SV=1\\"\"\"\"\""	Cirbp	3	7	7	18.607	4.94547e+06	2.97867e+07	0.000398006	0.16603	5032600	4915500	4888300	26149000	29246000	33965000
Q9Z204-4	heterogeneous nuclear ribonucleoprotein C	\\sp|Q9Z204-4|HNRPC_MOUSE Isoform of Q9Z204, Isoform 4 of Heterogeneous nuclear ribonucleoproteins C1/C2 OS=Mus musculus OX=10090 GN=Hnrnpc\\"\"\"\"\""	Hnrnpc	1	24	1	32.223	399737	2.52773e+06	0.000103239	0.15814	398880	383800	416530	2441200	2344600	2797400
Q3UWK9	predicted gene 813	tr|Q3UWK9|Q3UWK9_MOUSE Ferritin OS=Mus musculus OX=10090 GN=Gm813 PE=2 SV=1	Gm813	1	1	1	20.621	40474.3	308170	4.38e-05	0.131337	43798	46402	31223	294770	295230	334510

## Sheet: Supplementary file 1B
Supplementary file 1B. The enriched cellular components of different expression proteins between Cep78+/- and Cep78-/- male mice elongating spermatids.
Gene names	Protein names	Fold change (Cep78+/-/Cep78-/-)	Cellular component	p value (Cep78+/-/Cep78-/-)
Trim36	Tripartite motif-containing 36	4.92116	acrosomal vesicle	5.6e-11
Acrv1	Acrosomal vesicle protein 1	3.91619	acrosomal vesicle	5.6e-11
Itga1	Integrin alpha 1	3.41095	acrosomal vesicle	5.6e-11
Rab3a	RAB3A, member RAS oncogene family(	3.04577	acrosomal vesicle	5.6e-11
Capza3	Capping protein (actin filament) muscle Z-line, alpha 3	2.91682	acrosomal vesicle	5.6e-11
Tssk1	Testis-specific serine kinase 1	2.86491	acrosomal vesicle	5.6e-11
Tssk2	Testis-specific serine kinase 2	2.67953	acrosomal vesicle	5.6e-11
Prss39	Protease, serine 39	2.66624	acrosomal vesicle	5.6e-11
Spaca3	Sperm acrosome associated 3	2.65298	acrosomal vesicle	5.6e-11
Tsks	Testis-specific serine kinase substrate	2.64953	acrosomal vesicle	5.6e-11
Cypt1	Cysteine-rich perinuclear theca 1	2.59659	acrosomal vesicle	5.6e-11
Prss40	Protease, serine 40	2.56373	acrosomal vesicle	5.6e-11
Capzb	Capping protein (actin filament) muscle Z-line, beta	2.53443	acrosomal vesicle	5.6e-11
Spaca4	Sperm acrosome associated 4	2.51851	acrosomal vesicle	5.6e-11
Atp8b3	ATPase, class I, type 8B, member 3	2.5127	acrosomal vesicle	5.6e-11
Hexb	Hexosaminidase B	2.44627	acrosomal vesicle	5.6e-11
Fabp9	Fatty acid binding protein 9, testis	2.42876	acrosomal vesicle	5.6e-11
Spaca9	Sperm acrosome associated 9	2.29368	acrosomal vesicle	5.6e-11
Dnajb3	DnaJ heat shock protein family (Hsp40) member B3	2.26391	acrosomal vesicle	5.6e-11
Cd46	CD46 antigen, complement regulatory protein	2.25129	acrosomal vesicle	5.6e-11
Tbc1d21	TBC1 domain family, member 21	2.17693	acrosomal vesicle	5.6e-11
Fam170b	Family with sequence similarity 170, member B	2.16721	acrosomal vesicle	5.6e-11
Itgb1	Integrin beta 1 (fibronectin receptor beta)	2.16607	acrosomal vesicle	5.6e-11
Spesp1	Sperm equatorial segment protein 1	2.1291	acrosomal vesicle	5.6e-11
Spink2	Serine peptidase inhibitor, Kazal type 2	2.122	acrosomal vesicle	5.6e-11
Hyal5	Hyaluronoglucosaminidase 5	2.11961	acrosomal vesicle	5.6e-11
Zp3r	Zona pellucida 3 receptor	2.11643	acrosomal vesicle	5.6e-11
Arsa	Arylsulfatase A	2.09351	acrosomal vesicle	5.6e-11
Izumo1	Izumo sperm-egg fusion 1	2.0368	acrosomal vesicle	5.6e-11
Txndc8	Thioredoxin domain containing 8	2.02946	acrosomal vesicle	5.6e-11
Tssk4	Testis-specific serine kinase 4	0.309086	acrosomal vesicle	5.6e-11
Mbnl1	Muscleblind-like 1	3.45231	Centrosome	0.0072
Clasp1	CLIP associating protein 1	3.26193	Centrosome	0.0072
Clip1	CAP-GLY domain containing linker protein 1	2.86929	Centrosome	0.0072
Psma5	Proteasome (prosome, macropain) subunit, alpha type 5	2.84752	Centrosome	0.0072
Ndrg1	N-myc downstream regulated gene 1	2.69593	Centrosome	0.0072
Numa1	Nuclear mitotic apparatus protein 1	2.63946	Centrosome	0.0072
Cep85l	Centrosomal protein 85-like	2.61652	Centrosome	0.0072
Psma1	Proteasome (prosome, macropain) subunit, alpha type 1	2.616	Centrosome	0.0072
Cspp1	Centrosome and spindle pole associated protein 1	2.52418	Centrosome	0.0072
Ccsap	centriole, cilia and spindle associated protein	2.45092	Centrosome	0.0072
Lrrcc1	leucine rich repeat and coiled-coil domain containing 1	2.41902	Centrosome	0.0072
Actr1a	ARP1 actin-related protein 1A, centractin alpha	2.30844	Centrosome	0.0072
Ndel1	NudE neurodevelopment protein 1 like 1	2.304	Centrosome	0.0072
Sirt2	Sirtuin 2	2.27883	Centrosome	0.0072
Dnajb3	DnaJ heat shock protein family (Hsp40) member B3	2.26391	Centrosome	0.0072
Dync1i2	Dynein cytoplasmic 1 intermediate chain 2	2.24783	Centrosome	0.0072
Dync1h1	Dynein cytoplasmic 1 heavy chain 1	2.21097	Centrosome	0.0072
Pafah1b1	Platelet-activating factor acetylhydrolase, isoform 1b, subunit 1	2.18964	Centrosome	0.0072
Vps4a	Vacuolar protein sorting 4A	2.14411	Centrosome	0.0072
Prkar2a	Protein kinase, cAMP dependent regulatory, type II alpha	2.14291	Centrosome	0.0072
Marcks	Myristoylated alanine rich protein kinase C substrate	2.11953	Centrosome	0.0072
Dynll2	Dynein light chain LC8-type 2	2.11311	Centrosome	0.0072
Ddah2	Dimethylarginine dimethylaminohydrolase 2	2.09458	Centrosome	0.0072
Cdk5rap2	CDK5 regulatory subunit associated protein 2	2.08993	Centrosome	0.0072
Cep350	Centrosomal protein 350	2.07741	Centrosome	0.0072
Arl2bp	ADP-ribosylation factor-like 2 binding protein	2.06635	Centrosome	0.0072
Gnai2	Guanine nucleotide binding protein (G protein), alpha inhibiting 2	2.04875	Centrosome	0.0072
Dctn2	Dynactin 2	2.03634	Centrosome	0.0072
Dctn6	Dynactin 6	2.03593	Centrosome	0.0072
Dctn1	Dynactin 1	2.03532	Centrosome	0.0072
Cep55	Centrosomal protein 55	2.01834	Centrosome	0.0072
Lzts2	Leucine zipper, putative tumor suppressor 2	2.00867	Centrosome	0.0072
1700029J07Rik	RIKEN cDNA 1700029J07 gene	0.471547	Centrosome	0.0072
Npm1	Nucleophosmin 1	0.456185	Centrosome	0.0072
Cenpf	Centromere protein F	0.411674	Centrosome	0.0072
Dynlt3	Dynein light chain Tctex-type 3	2.82111	dynein complex	0.021
Dync1i2	Dynein cytoplasmic 1 intermediate chain 2	2.24783	dynein complex	0.021
Dync1h1	Dynein cytoplasmic 1 heavy chain 1	2.21097	dynein complex	0.021
Dynll2	Dynein light chain LC8-type 2	2.11311	dynein complex	0.021
Dctn2	Dynactin 2	2.03634	dynein complex	0.021
Dctn1	Dynactin 1	2.03532	dynein complex	0.021
Knstrn	Kinetochore-localized astrin/SPAG5 binding	3.29468	microtubule cytoskeleton	0.00058
Usp44	Ubiquitin specific peptidase 44	3.19461	microtubule cytoskeleton	0.00058
Mapre3	Microtubule-associated protein, RP/EB family, member 3	3.14169	microtubule cytoskeleton	0.00058
Clip1	CAP-GLY domain containing linker protein 1	2.86929	microtubule cytoskeleton	0.00058
Hook1	Hook microtubule tethering protein 1	2.82388	microtubule cytoskeleton	0.00058
Nav1	Neuron navigator 1	2.78364	microtubule cytoskeleton	0.00058
Ndrg1	N-myc downstream regulated gene 1	2.69593	microtubule cytoskeleton	0.00058
Tex35	Testis expressed 35	2.66056	microtubule cytoskeleton	0.00058
Map7	Microtubule-associated protein 7	2.4609	microtubule cytoskeleton	0.00058
Spata7	Spermatogenesis associated 7	2.43715	microtubule cytoskeleton	0.00058
Ccser2	Coiled-coil serine rich 2	2.39466	microtubule cytoskeleton	0.00058
Mast2	Microtubule associated serine/threonine kinase 2	2.34151	microtubule cytoskeleton	0.00058
Actr1a	ARP1 actin-related protein 1A, centractin alpha	2.30844	microtubule cytoskeleton	0.00058
Tubb3	Tubulin, beta 3 class III	2.26827	microtubule cytoskeleton	0.00058
Map1lc3a	Microtubule-associated protein 1 light chain 3 alpha	2.2607	microtubule cytoskeleton	0.00058
F11r	F11 receptor	2.25154	microtubule cytoskeleton	0.00058
Sptan1	Spectrin alpha, non-erythrocytic 1	2.22579	microtubule cytoskeleton	0.00058
Pafah1b1	Platelet-activating factor acetylhydrolase, isoform 1b, subunit 1	2.18964	microtubule cytoskeleton	0.00058
Dst	Dystonin	2.13056	microtubule cytoskeleton	0.00058
Wapl	WAPL cohesin release factor	2.05258	microtubule cytoskeleton	0.00058
Cabs1	Calcium binding protein, spermatid specific 1	3.19829	motile cilium	0.0082
Sord	Sorbitol dehydrogenase	2.96206	motile cilium	0.0082
Tssk1	Testis-specific serine kinase 1	2.86491	motile cilium	0.0082
Pfkm	Phosphofructokinase, muscle	2.70112	motile cilium	0.0082
Ldhc	Lactate dehydrogenase C	2.5278	motile cilium	0.0082
Pafah1b1	Platelet-activating factor acetylhydrolase, isoform 1b, subunit 1	2.18964	motile cilium	0.0082
Oxct2b	3-oxoacid CoA transferase 2B	2.07977	motile cilium	0.0082
Cabyr	Calcium-binding tyrosine-(Y)-phosphorylation regulated (fibrousheathin 2)	2.05264	motile cilium	0.0082
Klc3	Kinesin light chain 3	2.01229	motile cilium	0.0082
Fsip2	Fibrous sheath-interacting protein 2	0.429258	motile cilium	0.0082
Tssk4	Testis-specific serine kinase 4	0.309086	motile cilium	0.0082
Akap4	A kinase (PRKA) anchor protein 4	0.258947	motile cilium	0.0082
Gstm5	Glutathione S-transferase, mu 5	3.82773	sperm fibrous sheath	0.00051
Pgk2	Phosphoglycerate kinase 2	3.81449	sperm fibrous sheath	0.00051
Aldoart1	Aldolase 1 A, retrogene 1	2.63452	sperm fibrous sheath	0.00051
Cabyr	Calcium-binding tyrosine-(Y)-phosphorylation regulated (fibrousheathin 2)	2.05264	sperm fibrous sheath	0.00051
Nme8	NME/NM23 family member 8	2.03854	sperm fibrous sheath	0.00051
Akap4	A kinase (PRKA) anchor protein 4	0.258947	sperm fibrous sheath	0.00051
Pfkm	Phosphofructokinase, muscle	2.70112	sperm principal piece	0.01
Hk1	Hexokinase 1	2.49131	sperm principal piece	0.01
Cabyr	Calcium-binding tyrosine-(Y)-phosphorylation regulated (fibrousheathin 2)	2.05264	sperm principal piece	0.01
Nme8	NME/NM23 family member 8	2.03854	sperm principal piece	0.01
Pgam1	phosphoglycerate mutase 1	2.00723	sperm principal piece	0.01
Akap4	A kinase (PRKA) anchor protein 4	0.258947	sperm principal piece	0.01
