# Supplementary figures and images for: Absence of CEP78 causes photoreceptor and sperm flagella impairments in mice and a human individual
Source: eLife journal article supplement (doi:10.7554/elife.76157), 2023-02-09

Figure 6-figure supplement 1-Source data

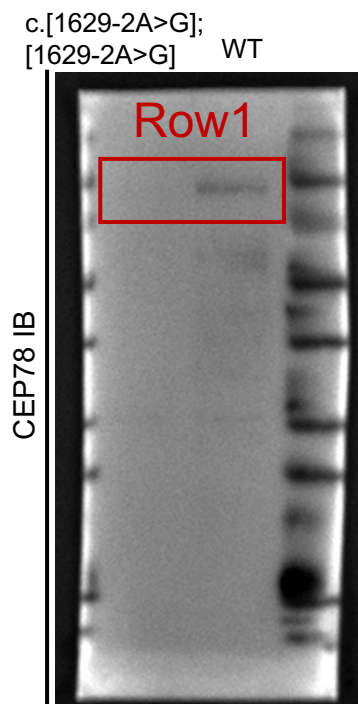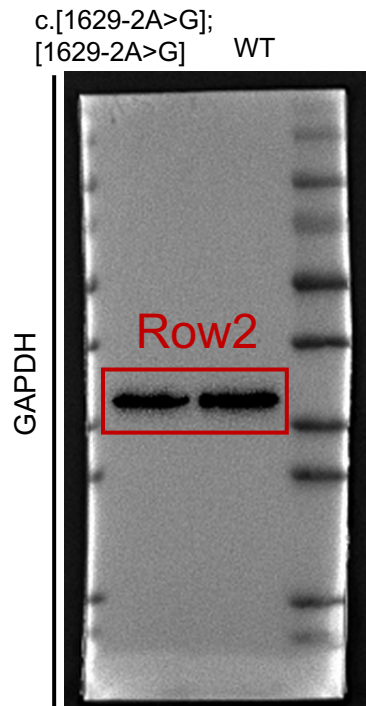

Supplement: fig6-figsupp1-data1 [file elife-76157-fig6-figsupp1-data1-v2.zip]

Figure 7-figure supplement 1-source data

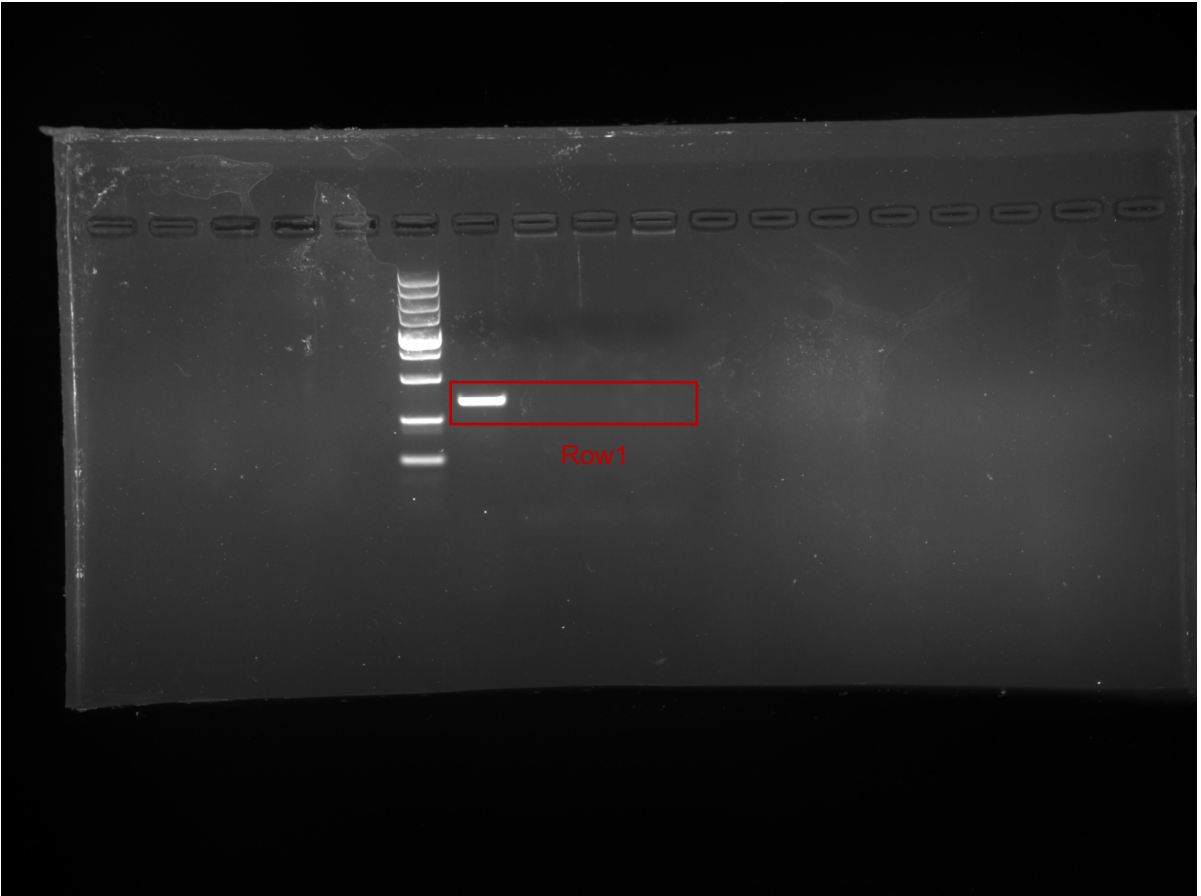

Supplement: fig7-figsupp1-data1 [file elife-76157-fig7-figsupp1-data1-v2.zip]

Figure 7-figure supplement 3D-source data

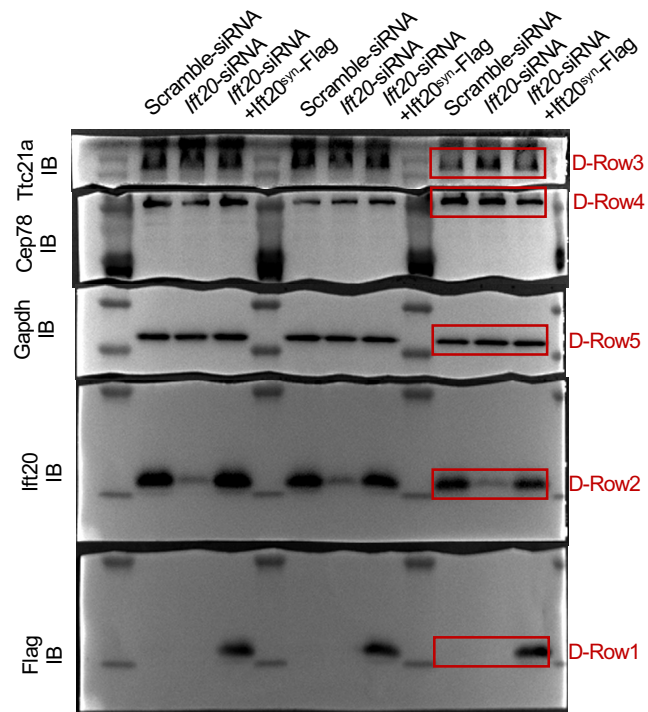

Figure 7-figure supplement 3H-source data

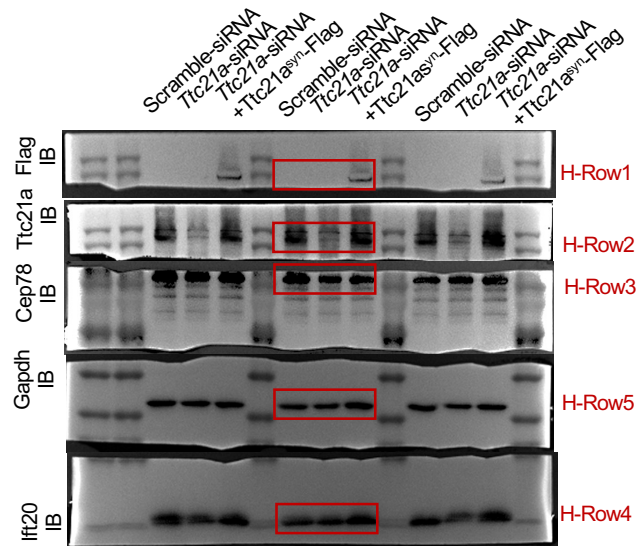

Supplement: fig7-figsupp3-data1 [file elife-76157-fig7-figsupp3-data1-v2.zip]

Figure 7-figure supplement 5-source data

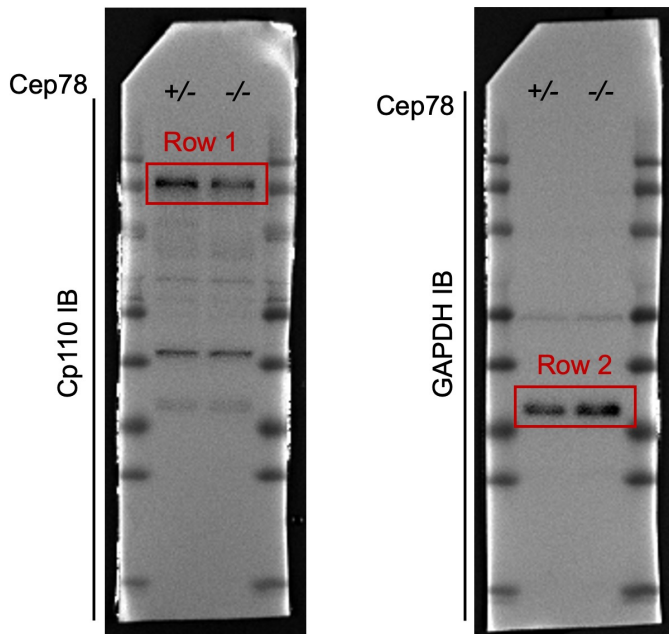

Supplement: fig7-figsupp5-data1 [file elife-76157-fig7-figsupp5-data1-v2.zip]
